# Supplementary material for: Towards the generation of potential energy surfaces of weakly bound medium-sized molecular systems: the case of benzonitrile–He complex
Source: Royal Society of Chemistry journal article supplement (doi:10.1039/d3cp02720a), 2023-01-01
Supplement: d3cp02720a1.pdf [file d3cp02720a1.pdf]

## **Supplementary Material**

### **Towards the generation of potential energy surfaces of weakly bound medium sized molecular systems: The case of benzonitrile – He complex**

Eya Derbali, Yosra Ajili, Bilel Mehnen, Piotr Żuchowski, Dariusz Kędziera,  
Muneerah Mogren Al-Mogren, Nejm-Edine Jaidane and Majdi Hochlaf

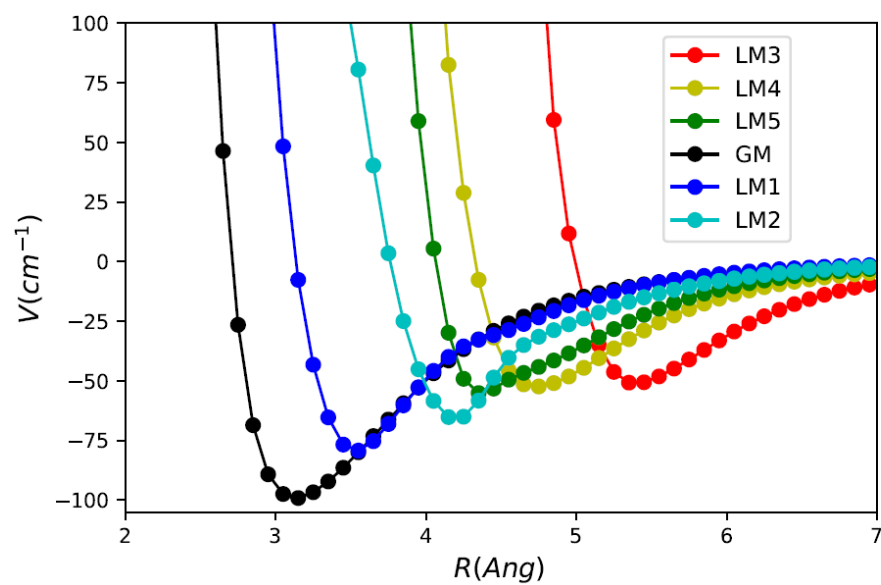

**Figure S1:** Radial cuts along the  $R$  intermolecular distance for the stationary points of the 3D-PES obtained using the autoPES protocol as described in the main manuscript.

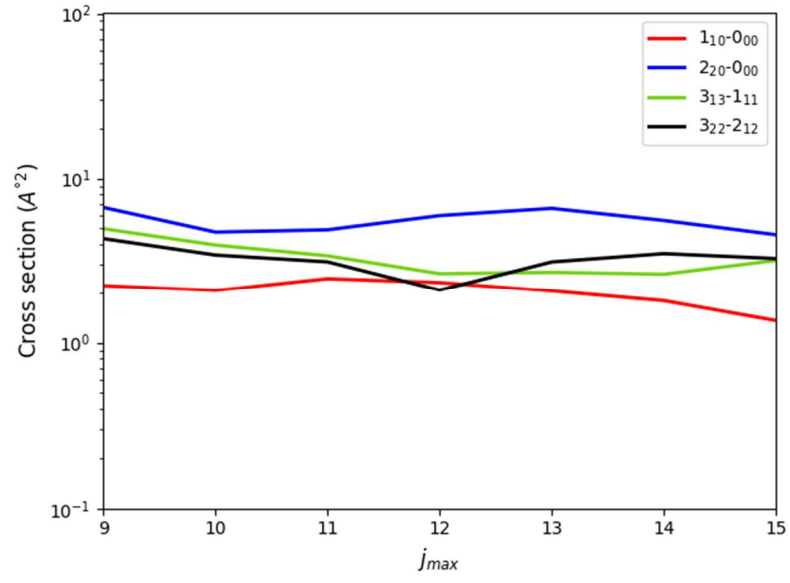

**Figure S2:** Cross sections convergence as function of  $j_{\max}$  parameter for selected transitions for collisional energy  $E = 10 \text{ cm}^{-1}$ .

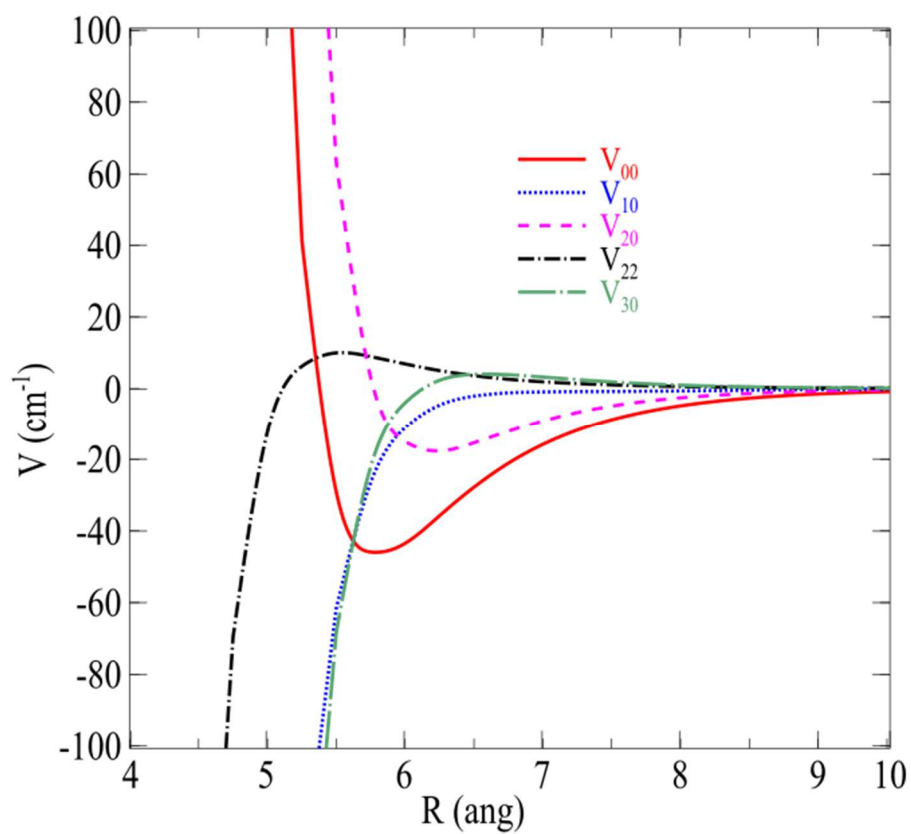

**Figure S3:**  $v_{lm}$  expansions of the interaction 3D-PES as a function of the radial Jacobi coordinate  $R$ . These terms are given below.

**Table S1:** Experimental geometry in Cartesian coordinates (in Å) of benzonitrile in its vibrational ground state as determined by Császár and Fogarasi <sup>i</sup>.

|   | X             | y             | z             |
|---|---------------|---------------|---------------|
| C | 0.0006149094  | -0.0000001128 | -0.5438779176 |
| C | 1.2100449580  | -0.0000001926 | 0.1515070538  |
| C | 1.2030045887  | 0.0000000005  | 1.5353315122  |
| C | -0.0006600570 | 0.0000002549  | 2.2267842345  |
| C | -1.2038006052 | 0.0000000913  | 1.5341493694  |
| C | -1.2094825364 | -0.0000003466 | 0.1502660736  |
| C | 0.0010579760  | 0.0000000517  | -1.9713054935 |
| N | -0.0005503274 | 0.0000002064  | -3.1230669198 |
| H | -2.1413882698 | -0.0000004181 | -0.4000784362 |
| H | -2.1420620879 | 0.0000005356  | 2.0744328563  |
| H | -0.0014471530 | 0.0000003427  | 3.3098610852  |
| H | 2.1407892284  | -0.0000002296 | 2.0765465937  |
| H | 2.1424701853  | -0.0000000788 | -0.3979726135 |

**Table S2:** R Jacobi coordinates used in the present computations.

100, 50, 40, 30, 25, 20, 18, 16, 14, 13, 12, 11, 10.5, 10, 9.75, 9.5, 9.25, 9, 8.75, 8.5, 8.25, 8, 7.75, 7.5, 7.25, 7, 6.75, 6.5, 6.25, 6, 5.75, 5.5, 5.25, 5, 4.75, 4.5, 4.25, 4, 3.75, 3.5, 3.25, 3, 2.75, 2.5

**Table S3:** Minimal distance (R in Å) and the corresponding well depth (V in cm<sup>-1</sup>) of benzonitrile – He for various nuclear configurations (Figure 2) as obtained using standard and explicitly correlated methods, where the atoms are described with the aug-cc-pVTZ basis set.

| Method                                           | CCSD(T)-F12 |       | DCSD-F12 |       | DCSD |       | MP2-F12 |       | MP2  |       | Gaussian process model <sup>a)</sup> |        | SAPT2+3 |        | SAPT(DFT) |       |
|--------------------------------------------------|-------------|-------|----------|-------|------|-------|---------|-------|------|-------|--------------------------------------|--------|---------|--------|-----------|-------|
|                                                  | R           | V     | R        | V     | R    | V     | R       | V     | R    | V     | R                                    | V      | R       | V      | R         | V     |
| Position 1<br>$\phi=0^\circ / \theta=180^\circ$  | 6.44        | -25.0 | 6.45     | -22.5 | 6.45 | -22.5 | 6.51    | -20.4 | 6.61 | -17.6 | 6.75                                 | -17.21 | 6.50    | -23.12 | 6.61      | -24.6 |
| Position 2<br>$\phi=0^\circ / \theta=135^\circ$  | 4.67        | -44.7 | 4.69     | -40.8 | 4.71 | -38.7 | 4.76    | -34.0 | 4.79 | -33.5 | 4.75                                 | -38.80 | 4.66    | -40.6  | 4.70      | -41.1 |
| Position 3<br>$\phi=0^\circ / \theta=120^\circ$  | 4.75        | -37.4 | 4.67     | -34.6 | 4.71 | -31.6 | 4.71    | -31.6 | 4.75 | -28.6 | 4.75                                 | -28.57 | 4.64    | -38.4  | 4.70      | -37.9 |
| Position 4<br>$\phi=0^\circ / \theta=90^\circ$   | 4.87        | -31.7 | 4.83     | -35.2 | 4.83 | -35.2 | 4.87    | -31.7 | 4.91 | -29.3 | 5.00                                 | -28.77 | 4.81    | -37.8  | 4.86      | -37.6 |
| Position 5<br>$\phi=0^\circ / \theta=0^\circ$    | 6.13        | -25.3 | 6.12     | -22.8 | 6.14 | -21.5 | 6.18    | -19.7 | 6.21 | -18.2 | 6.25                                 | -17.59 | 6.11    | -26.5  | 6.15      | -26.3 |
| Position 6<br>$\phi=90^\circ / \theta=90^\circ$  | 3.26        | -77.2 | 3.29     | -69.4 | 3.35 | -60.6 | 3.25    | -80.8 | 3.31 | -70.5 | 3.25                                 | -80.48 | 3.32    | -77.6  | 3.28      | -81.7 |
| Position 7<br>$\phi=90^\circ / \theta=45^\circ$  | 4.69        | -34.1 | 4.71     | -30.1 | 4.81 | -26.7 | 4.70    | -32.2 | 4.79 | -28.0 | 4.75                                 | -32.05 | 4.68    | -34.2  | 4.68      | -35.8 |
| Position 8<br>$\phi=90^\circ / \theta=135^\circ$ | 4.69        | -35.0 | 4.70     | -31.5 | 4.83 | -26.3 | 4.67    | -34.1 | 4.80 | -27.8 | 4.75                                 | -27.43 | 4.71    | -33.2  | 4.75      | -33.3 |

a) Results of Gaussian process model for extrapolation. Ref. [2].

**Table S4:** Characteristics of a single point computations for  $R = 8.25 \text{ \AA}$ ,  $\theta = 180^\circ$   $\phi = 0^\circ$  using different methods in conjunction with the aug-cc-pVTZ basis set.

| MOLPRO package              |                  |                                   |
|-----------------------------|------------------|-----------------------------------|
| Approach                    | CPU time (Hours) | Disk occupancy (GB) <sup>a)</sup> |
| CCSD(T)-F12                 | 28.04            | 95.4                              |
| DCSD-F12                    | 9.67             | 95.4                              |
| DCSD                        | 6.55             | 95.4                              |
| MP2-F12                     | 1.59             | 95.4                              |
| MP2                         | 1.36             | 95.4                              |
| Psi4 package                |                  |                                   |
| SAPT0                       | 0.05             | 4.8                               |
| SAPT2                       | 0.79             | 11.0                              |
| SAPT2+                      | 0.88             | 14.0                              |
| SAPT2+(3)                   | 1.28             | 14.0                              |
| SAPT2+3                     | 1.97             | 14.0                              |
| SAPT from Szalewicz's group |                  |                                   |
| SAPT(DFT)                   | 0.55             | 18.0                              |

**Table S5:** Comparison between calculated and experimental frequencies (in MHz) for the detected transitions of benzonitrile – He system. The Observed frequencies are taken for  $F = j$  and  $F' = j'$ , where we give the corresponding uncertainties between parentheses.

| $j_{K_a K_c} - j'_{K'_a K'_c}$ transitions | Calculated  | Observed <sup>3</sup> |
|--------------------------------------------|-------------|-----------------------|
| $7_{07} - 6_{06}$                          | 18 409.3490 | 18 409.3879(2)        |
| $7_{26} - 6_{25}$                          | 19 178.3021 | 19 179.0017(2)        |
| $5_{25} - 6_{24}$                          | 20 095.6940 | 20 095.9645(2)        |
| $7_{16} - 6_{15}$                          | 20 192.4430 | 20 192.9342(2)        |
| $8_{08} - 7_{07}$                          | 20 826.1863 | 20 828.2045(2)        |
| $8_{27} - 7_{26}$                          | 21 854.7442 | 21 855.9322(3)        |
| $8_{17} - 7_{16}$                          | 22 942.6161 | 22 943.4729(3)        |
| $8_{26} - 7_{25}$                          | 23 110.4669 | 23 110.9171(3)        |
| $9_{09} - 8_{08}$                          | 23 224.7298 | 23 227.7127(3)        |

**Table S6:** Cross sections tests of convergence for  $R_{\min}$ ,  $R_{\max}$  and STEPS parameters for selected transitions

| $R_{\min}$ |                    |                    |                    |                    |                    |
|------------|--------------------|--------------------|--------------------|--------------------|--------------------|
| j - j'     | $R_{\min} = 1.05$  | $R_{\min} = 1.19$  | $R_{\min} = 1.32$  | $R_{\min} = 1.45$  | $R_{\min} = 1.58$  |
| 4→1        | 1.33863            | 1.33862            | 1.34210            | 1.39544            | 1.44347            |
| 9→1        | 3.77598            | 3.77599            | 3.77474            | 3.74429            | 3.79684            |
| 45→1       | 1.47014            | 1.47014            | 1.47091            | 1.47757            | 1.43646            |
| 8→2        | 2.71120            | 2.71120            | 2.71096            | 2.70138            | 2.73937            |
| 4→6        | 1.21233            | 1.21233            | 1.21622            | 1.24285            | 1.30436            |
| 6→12       | 1.21614            | 1.21614            | 1.21655            | 1.20314            | 1.25692            |
| 7→19       | 1.26821            | 1.26821            | 1.26773            | 1.26367            | 1.31203            |
| 44→27      | 1.19451            | 1.19451            | 1.19462            | 1.19653            | 1.22322            |
| 49→47      | 2.03749            | 2.03749            | 2.03748            | 2.03730            | 2.03209            |
| $R_{\max}$ |                    |                    |                    |                    |                    |
| j - j'     | $R_{\max} = 15.87$ | $R_{\max} = 18.52$ | $R_{\max} = 21.16$ | $R_{\max} = 23.81$ | $R_{\max} = 26.45$ |
| 4→1        | 1.51650            | 1.51290            | 1.52116            | 1.51758            | 1.51493            |
| 9→1        | 7.70615            | 7.71971            | 7.68998            | 7.70225            | 7.71191            |
| 45→1       | 1.07628            | 1.07340            | 1.07992            | 1.07713            | 1.07503            |
| 8→2        | 7.67924            | 7.68420            | 7.66374            | 7.66934            | 7.67378            |
| 9→6        | 1.98698            | 1.99265            | 1.97252            | 1.97852            | 1.98326            |
| 4→12       | 2.94734            | 2.94575            | 2.94829            | 2.94692            | 2.94586            |
| 8→19       | 2.10856            | 2.11450            | 2.08895            | 2.09582            | 2.10122            |
| 44→27      | 2.34519            | 2.34468            | 2.34536            | 2.34498            | 2.34467            |
| 7→47       | 1.13531            | 1.13657            | 1.13284            | 1.13412            | 1.13512            |

| STEPS / $E = 10 \text{ cm}^{-1}$ |         |         |         |         |         |
|----------------------------------|---------|---------|---------|---------|---------|
| j - j'                           | 40      | 50      | 60      | 70      | 80      |
| 4→1                              | 1.26204 | 1.30863 | 1.32761 | 1.33602 | 1.34023 |
| 9→1                              | 7.38233 | 7.42739 | 7.44506 | 7.45278 | 7.45663 |
| 45→1                             | 1.61096 | 1.67068 | 1.69349 | 1.70335 | 1.70825 |
| 7→2                              | 2.21073 | 2.17876 | 2.16853 | 2.16443 | 2.16248 |
| 4→6                              | 2.82002 | 2.74958 | 2.72338 | 2.71210 | 2.70653 |
| 4→12                             | 2.44421 | 2.45088 | 2.45365 | 2.45489 | 2.45552 |
| 44→27                            | 2.42098 | 2.42177 | 2.42225 | 2.42249 | 2.42261 |
| 10→47                            | 2.75818 | 2.77984 | 2.78406 | 2.78511 | 2.78543 |

## Benzonitrile - He $v_{\text{im}}(\text{R})$ for 151 values of R starting from 2.25 angstrom with a regular step of 0.25 angstrom

1 m  
0 0  
0.2854634511E+05 0.2482062847E+05 0.2117429489E+05 0.1729900074E+05 0.1348858222E+05 0.9934277033E+04 0.7123632436E+04 0.4772027213E+04 0.2936219174E+04 0.1566307552E+04 0.7311281369E+03 0.2439826554E+03 0.4138524529E+02 -0.2911982588E+02 -0.4588372753E+02 -0.4345668700E+02 -0.3575611488E+02 -0.2780582242E+02 -0.2109110561E+02 -0.1581906595E+02 -0.1180480609E+02 -0.8789366536E+01 -0.6538574997E+01 -0.4864324678E+01 -0.3621785086E+01 -0.2701238933E+01 -0.2020100090E+01 -0.1516436638E+01 -0.114396683E+01 -0.8682373938E+00 -0.6636988605E+00 -0.5114857420E+00 -0.3975209765E+00 -0.3122133838E+00 -0.2475754305E+00 -0.1982224376E+00 -0.1599001612E+00 -0.1302732422E+00 -0.1074860432E+00 -0.8968292660E-01 -0.7524082049E-01 -0.6346691596E-01 -0.5390096983E-01 -0.4608273888E-01 -0.3959598597E-01 -0.3420049815E-01 -0.2970006854E-01 -0.2589849025E-01 -0.2262416784E-01 -0.1980395173E-01 -0.1738930379E-01 -0.1533168590E-01 -0.1358255992E-01 -0.1209338772E-01 -0.1081563119E-01 -0.9700752184E-02 -0.8706864035E-02 -0.7818685870E-02 -0.7027588271E-02 -0.6324941819E-02 -0.5702117094E-02 -0.5150484677E-02 -0.4661415151E-02 -0.4226279094E-02 -0.3837227790E-02 -0.3489535319E-02 -0.3179256465E-02 -0.2902446008E-02 -0.2655158731E-02 -0.2433449417E-02 -0.2233732847E-02 -0.2050983804E-02 -0.1882889823E-02 -0.1727909453E-02 -0.1585413997E-02 -0.1454774759E-02 -0.1335363040E-02 -0.122650144E-02 -0.1127707373E-02 -0.1038206031E-02 -0.9574174198E-03 -0.8847128424E-03 -0.8194636016E-03 -0.7610410003E-03 -0.7088163413E-03 -0.6621609273E-03 -0.62604460612E-03 -0.5830430458E-03 -0.5493231838E-03 -0.5186577782E-03 -0.494183116E-03 -0.4639755469E-03 -0.4388009755E-03 -0.4147639631E-03 -0.3918337041E-03 -0.3699793929E-03 -0.3491702237E-03 -0.3293753909E-03 -0.3105640889E-03 -0.2927055121E-03 -0.2757688547E-03 -0.2597233111E-03 -0.2445380757E-03 -0.2301823427E-03 -0.2166253067E-03 -0.2038361618E-03 -0.1917841025E-03 -0.1804383231E-03 -0.1697680180E-03 -0.1597423814E-03 -0.1503306078E-03 -0.1415018914E-03 -0.1332271094E-03 -0.1254838696E-03 -0.1182514625E-03 -0.1115091788E-03 -0.1052363090E-03 -0.9941214358E-04 -0.9401597321E-04 -0.8902708842E-04 -0.8442477977E-04 -0.8018833783E-04 -0.7629705316E-04 -0.7273021633E-04 -0.6946711789E-04 -0.6648704842E-04 -0.6376929847E-04 -0.6129315861E-04 -0.5903791940E-04 -0.5698287142E-04 -0.5510730521E-04 -0.5339051135E-04 -0.5181178039E-04 -0.5035040291E-04 -0.4898566946E-04 -0.4769687061E-04 -0.4646329693E-04 -0.4526423897E-04 -0.4407898731E-04 -0.4288683250E-04 -0.4166706510E-04 -0.4039897569E-04 -0.3906185483E-04 -0.3763499307E-04 -0.3609768099E-04 -0.3442920914E-04 -0.3260886810E-04 -0.3061594842E-04 -0.2842974067E-04 -0.2602953541E-04 -0.2339462321E-04 -0.2050429462E-04  
1 0  
0.3780719522E+03 0.1307265741E+04 0.2226160228E+04 0.3037682619E+04 0.3174197483E+04 0.2724527999E+04 0.1975170436E+04 0.6497289030E+03 -0.4096311747E+03 -0.7329243868E+03 -0.6124539443E+03 -0.3049336389E+03 -0.1397145108E+03 -0.6167394307E+02 -0.2646522371E+02 -0.1111454803E+02 -0.4679384768E+01 -0.2137544840E+01 -0.1225111329E+01 -0.9405449863E+00 -0.8575499895E+00 -0.8098339678E+00 -0.7451596280E+00 -0.6575222398E+00 -0.5562705584E+00 -0.4529118457E+00 -0.3562903956E+00 -0.2716434817E+00 -0.2010906415E+00 -0.1445913076E+00 -0.1008279007E+00 -0.6789925408E-01 -0.4374896342E-01 -0.2652589266E-01 -0.1452285069E-01 -0.6730882512E-02 -0.9114045625E-03 0.2510917163E-02 0.4524604285E-02 0.5362178421E-02 0.5778653483E-02 0.5847012544E-02 0.5667730968E-02 0.5341284120E-02 0.4954836764E-02 0.4542311256E-02 0.421439352E-02 0.3721472808E-02 0.3350601256E-02 0.3013405833E-02 0.2707805556E-02 0.2431719438E-02 0.2183066494E-02 0.1959765739E-02 0.1759736188E-02 0.1580896856E-02 0.1421251841E-02 0.1279145578E-02 0.1153007586E-02 0.1041267384E-02 0.9423544895E-03 0.8546984221E-03 0.7767287003E-03 0.7068748428E-03 0.6437426564E-03 0.5866430999E-03 0.5350634203E-03 0.4884908645E-03 0.4464126796E-03 0.4083161122E-03 0.3736884096E-03 0.3420168185E-03 0.3128551683E-03 0.2860236179E-03 0.2614089088E-03 0.2388977823E-03 0.2183769797E-03 0.1997332424E-03 0.182853118E-03 0.1676239291E-03 0.1539318359E-03 0.1416637734E-03 0.1307064829E-03 0.1209467059E-03 0.1122711838E-03 0.1045666578E-03 0.9771986926E-04 0.9161755966E-04 0.8614647030E-04 0.8119334254E-04 0.7664491774E-04 0.7238793257E-04 0.6832731877E-04 0.6444068526E-04 0.6072383603E-04 0.5717257036E-04 0.5378268757E-04 0.5054998694E-04 0.4747026778E-04 0.4453932938E-04 0.4175297104E-04 0.3910699207E-04 0.3659719174E-04 0.3421936938E-04 0.3196932727E-04 0.2984285571E-04 0.2783576300E-04 0.2594384544E-04 0.2416290232E-04 0.2248873295E-04 0.2091713662E-04 0.1944391263E-04 0.1806497183E-04 0.1677667122E-04 0.1557547938E-04 0.1445786487E-04 0.1342029625E-04 0.1245924209E-04 0.1157117095E-04 0.1075255139E-04 0.9999851979E-05 0.9309541277E-05 0.8678087849E-05 0.8101960259E-05 0.7577627070E-05 0.7110556845E-05 0.6670218149E-05 0.6280079544E-05 0.5927609595E-05 0.5609276864E-05 0.5321549916E-05 0.50680897314E-05 0.4823787622E-05 0.4606689402E-05 0.4406071220E-05 0.4218401637E-05 0.4040149219E-05 0.3867782528E-05 0.3697770128E-05 0.3526580624E-05 0.335068254E-05 0.3166544308E-05 0.2970634708E-05 0.2759422216E-05 0.2529375396E-05 0.2276962813E-05 0.1998653028E-05 0.1690914607E-05 0.1350216113E-05 0.9730261083E-06 0.5558131576E-06 0.9504582427E-07  
2 0  
0.4623494050E+04 0.6259366511E+04 0.7337190594E+04 0.8028042445E+04 0.8893036815E+04 0.9305322755E+04 0.8335063643E+04 0.6583352867E+04 0.4757969147E+04 0.2888725214E+04 0.1531564447E+04 0.6337605738E+03 0.2278770438E+03 0.6317578317E+02 0.3052611415E+01 -0.1502965904E+02 -0.1764787472E+02 -0.1537797792E+02 -0.1211947890E+02 -0.9144342631E+01 -0.6757307031E+01 -0.4941448379E+01 -0.3594592078E+01 -0.2608764559E+01 -0.1892665202E+01 -0.1374889584E+01 -0.1001542785E+01 -0.7326702249E+00 -0.5390116567E+00 -0.3993192655E+00 -0.2982697211E+00 -0.2248686903E+00 -0.1711473339E+00 -0.1318512075E+00 -0.1026750847E+00 -0.8082669138E-01 -0.6414515717E-01 -0.514827240E-01 -0.4194299260E-01 -0.3463227335E-01 -0.2877079638E-01 -0.2404214825E-01 -0.2024564169E-01 -0.1718058943E-01 -0.1466572156E-01 -0.1259743756E-01 -0.1089155429E-01 -0.9463888581E-02 -0.8241097004E-02 -0.7193195034E-02 -0.6301037875E-02 -0.5545480729E-02 -0.4907378799E-02 -0.4367587288E-02 -0.3906961400E-02 -0.3506356336E-02 -0.3149308123E-02 -0.2830076085E-02 -0.2545600367E-02 -0.2292821117E-02 -0.2068678481E-02 -0.1870112606E-02 -0.1694063638E-02 -0.1537471725E-02 -0.1397546880E-02 -0.1272578593E-02 -0.1161126220E-02 -0.1061749117E-02 -0.9730066405E-03 0.8934581474E-03 -0.8216629940E-03 -0.7561805369E-03 -0.6957733052E-03 -0.6400165187E-03 -0.5886885701E-03 -0.5415678518E-03 -0.4984327563E-03 -0.4590616763E-03 -0.423330042E-03 -0.3907251325E-03 -0.3613164539E-03 -0.3347853608E-03 -0.3109102457E-03 -0.2894695013E-03 -0.2702415200E-03 -0.2530046944E-03 -0.2375374169E-03 -0.2263180803E-03 -0.2110250768E-03 -0.1995367992E-03 -0.1889316400E-03 -0.178979916E-03 -0.1695192615E-03 -0.1604789166E-03 -0.1518554389E-03 -0.1436373103E-03 -0.1358130125E-03 -0.1283710275E-03 -0.1212998371E-03 -0.1145879231E-03 -0.1086927676E-03 -0.1021958522E-03 -0.9649265902E-04 -0.9110266975E-04 -0.8601436632E-04 -0.8121623059E-04 -0.7669674444E-04 -0.7244438973E-04 -0.6844764833E-04 -0.6469500211E-04 -0.61117493295E-04 -0.5787592270E-04 -0.5478706329E-04 -0.5189988690E-04 -0.4920635373E-04 -0.4669915202E-04 -0.4436987797E-04 -0.4221085582E-04 -0.4021422777E-04 -0.3837213605E-04 -0.3667672289E-04 -0.3512013050E-04 -0.3369450110E-04 -0.3239197691E-04 -0.3120470016E-04 -0.3012481306E-04 -0.2914445784E-04 -0.2825577671E-04 -0.2745091189E-04 -0.2672200561E-04 -0.2606120009E-04 -0.2546063754E-04 -0.2491246019E-04 -0.2448891026E-04 -0.2394182997E-04 -0.2350366153E-04 -0.2308647117E-04 -0.2268232911E-04 -0.2228344957E-04 -0.2218819507E-04 -0.2146997494E-04 -0.2103966428E-04 -0.2058316103E-04 -0.2009260739E-04 -0.1956014560E-04 -0.1897791787E-04 -0.1833806643E-04 -0.1763273349E-04 -0.1685406127E-04 -0.1599419200E-04 -0.1504526789E-04 -0.1399943117E-04  
2 2  
-0.5162140857E+04 -0.6692800753E+04 -0.7061957450E+04 -0.6456992363E+04 -0.5026990984E+04 -0.3363598111E+04 -0.2265871729E+04 -0.1344650619E+04 -0.5955275398E+03 -0.2213585652E+03 -0.6964029727E+02 -0.1227537059E+02 0.6210920166E+01 0.9964293974E+01 0.8932390133E+01 0.6878886952E+01 0.5016936463E+01 0.3605189122E+01 0.2599574281E+01 0.1894187890E+01 0.1395715369E+01 0.1037455983E+01 0.7752937574E+00 0.5806675776E+00 0.3438247071E+00 0.3250665485E+00 0.2462128676E+00 0.1803227772E+00 0.11338270835E+00 0.9916001582E+01 0.734185886E+01 0.5437819626E+01 0.4031531432E+01 0.3000783288E+01 0.2242037476E+01 0.1683182012E+01 0.1266464347E+01 0.9600570642E+02 0.7386194563E-02 0.5768108175E-02 0.45252668903E-02 0.3569292104E-02 0.2842157622E-02 0.2287445301E-02 0.185379718E-02 0.1516364396E-02 0.1252847595E-02 0.1043277572E-02 0.8699245828E-03 0.763468598E-03 0.6089246320E-03 0.5140381278E-03 0.4480675761E-03 0.3773932054E-03 0.3283952442E-03 0.2874539214E-03 0.2515000480E-03 0.2196667658E-03 0.1916377991E-03 0.1670968723E-03 0.1457277097E-03 0.1272140355E-03 0.1112395742E-03 0.9748804997E-04 0.8566250396E-04 0.7554324420E-04 0.6692989545E-04 0.5962208249E-04 0.5341943011E-04 0.4812156309E-04 0.44352810619E-04 0.3943868420E-04 0.3568416156E-04 0.3222036131E-04 0.2903434618E-04 0.2611371887E-04 0.2344392209E-04 0.2101363856E-04 0.1880939099E-04 0.1681824209E-04 0.1502725456E-04 0.1342349113E-04 0.1199401451E-04 0.1072588740E-04 0.9606172514E-05 0.8621932570E-05 0.7760230277E-05 0.7008128346E-05 0.6352689489E-05 0.5780976417E-05 0.5280051843E-05 0.4836978477E-05 0.4440565546E-05 0.4086608332E-05 0.3772648632E-05 0.3496228243E-05 0.3254888961E-05 0.3046172584E-05 0.2867620907E-05 0.2716775729E-05 0.2591178846E-05 0.2488372054E-05 0.2405897150E-05 0.2341295931E-05 0.2292110195E-05 0.2255881737E-05 0.2230152354E-05 0.2212463844E-05 0.2200358003E-05 0.2191376628E-05 0.2183061516E-05 0.2127954463E-05 0.2159033530E-05 0.2141021834E-05 0.2119078755E-05 0.2093363673E-05 0.2064035969E-05 0.2031255024E-05 0.1995180217E-05 0.1955970929E-05 0.1913786540E-05 0.1868786432E-05 0.1821129983E-05 0.1770976575E-05 0.1718485588E-05 0.1663816402E-05 0.1607128398E-05 0.1548580956E-05 0.1488333457E-05 0.1426545280E-05 0.1363375807E-05 0.1298984418E-05 0.1233530492E-05 0.1167173411E-05 0.1100072555E-05 0.1032387304E-05 0.9642770389E-06 0.8959011396E-06 0.8274189868E-06 0.7589899607E-06 0.6907734418E-06 0.6229288105E-06 0.5556154472E-06 0.4889927322E-06 0.4232200460E-06 0.3584567689E-06 0.2948622813E-06 0.2325959637E-06 0.1718171963E-06 0.1126853597E-06 0.5535983410E-07 0.5203176346E-08  
3 0  
-0.3897435174E+03 -0.1243366410E+04 -0.1760241314E+04 -0.1998164368E+04 -0.1998489904E+04 -0.1832803536E+04 -0.1518077556E+04 -0.1578029841E+04 -0.1522500634E+04 -0.1334637641E+04 -0.9432639579E+03 -0.4334031035E+03 -0.1798475202E+03 -0.6831807195E+02 -0.2205710850E+02 -0.4023602038E+01 0.2297324161E+01 0.3950011380E+01 0.3861058498E+01 0.3220632006E+01 0.2496067192E+01 0.1855124034E+01 0.1342587204E+01 0.9548120326E+00 0.6716040716E+00 0.467722536E+00 0.3282327086E+00 0.2301907238E+00 0.1626983185E+00 0.1163316352E+00 0.8440421293E+01 0.6228178588E+01 0.467470484E+01 0.3580985250E-01 0.2789639827E-01 0.2207383079E-01 0.1765705228E-01 0.1431102001E-01 0.1178820506E-01 0.9841078471E-02 0.8255754737E-02 0.6952922030E-02 0.5886911946E-02 0.5012056085E-02 0.4286583727E-02 0.3684314888E-02 0.3182967267E-02 0.2760258564E-02 0.2396718427E-02 0.2084124312E-02 0.1817065624E-02 0.1590131769E-02 0.139791251E-02 0.123405176E-02 0.1095973251E-02 0.9754327790E-03 0.8686928422E-03 0.7739862209E-03 0.6902473708E-03 0.6165187476E-03 0.5516808072E-03 0.4947220052E-03 0.4446037975E-03 0.4002876398E-03 0.3608385522E-03 0.3257358129E-03 0.2945622642E-03 0.2669007487E-03 0.2423341087E-03 0.2204451868E-03 0.2008168255E-03 0.1830318671E-03 0.1667313234E-03 0.1517888826E-03 0.1381364024E-03 0.1257057404E-03 0.1144287539E-03 0.1042373008E-03 0.9506323835E-04 0.8683842428E-04 0.7944971609E-04 0.7296397134E-04 0.6717804758E-04 0.62068080238E-04 0.5765809328E-04 0.5360777785E-04 0.5011971363E-04 0.4703575818E-04 0.4428776905E-04 0.4180760381E-04 0.3952712000E-04 0.3737817518E-04 0.3530398751E-04 0.3329321760E-04 0.3134588663E-04 0.2946201582E-04 0.2764162636E-04 0.2588473947E-04 0.2419137634E-04 0.2256155817E-04 0.2099530618E-04 0.1949264156E-04 0.1805358551E-04 0.1667815924E-04 0.1536638395E-04 0.1411828085E-04 0.1293887114E-04 0.1181317601E-04 0.1075621668E-04 0.9763014350E-05 0.8833590217E-05 0.7967965486E-05 0.

-0.1484853301E+03 -0.3758513210E+02 -0.6853791669E+03 -0.1806818355E+04 -0.2766098950E+04 -0.3280719822E+04 -0.3019115333E+04 -0.2058676309E+04 -0.9631694744E+03 -0.3830850322E+03 -0.1403317658E+03 -0.4299756592E+02 -0.7426849047E+01 -0.3493706573E+01 -0.5481109335E+01 -0.4775027190E+01 -0.3596116686E+01 -0.2592794933E+01 -0.1865760295E+01 -0.1363308488E+01 -0.1015174445E+01 -0.7675410540E+00 -0.5855779108E+00 -0.4481686144E+00 -0.3425902369E+00 -0.2606096082E+00 -0.1975772930E+00 -0.1884196033E+00 -0.1114695494E+00 -0.8312604949E+01 -0.6177865897E+01 -0.4581980207E+01 -0.3395124681E+01 -0.2521263504E+01 -0.1877533713E-01 -0.1404172487E-01 -0.1052548692E-01 -0.7954577952E-02 -0.6110519170E-02 -0.4774831763E-02 -0.3757227378E-02 -0.2980179480E-02 -0.2394351987E-02 -0.1950408820E-02 -0.1604451731E-02 -0.1334333803E-02 -0.1123345954E-02 -0.9547790999E-03 -0.8142500611E-03 -0.6966792723E-03 -0.5993130713E-03 -0.5193977962E-03 -0.4541797848E-03 -0.4009053753E-03 -0.3568209055E-03 -0.3191727135E-03 -0.2856238833E-03 -0.2555041237E-03 -0.2285601146E-03 -0.2045385595E-03 -0.1813853925E-03 -0.1642477692E-03 -0.1474720309E-03 -0.1326047226E-03 -0.1194095920E-03 -0.1077191989E-03 -0.9738330595E-04 -0.8825167578E-04 -0.8017407106E-04 -0.7300025445E-04 -0.6657998861E-04 -0.6076303621E-04 -0.5542069034E-04 -0.5051036587E-04 -0.4601100810E-04 -0.4190156234E-04 -0.3816097389E-04 -0.3476818806E-04 -0.3170215015E-04 -0.2894180547E-04 -0.2646609932E-04 -0.2425397701E-04 -0.2228438384E-04 -0.2053626512E-04 -0.1898856614E-04 -0.1762023223E-04 -0.1641020867E-04 -0.1533744078E-04 -0.1438087387E-04 -0.1351945322E-04 -0.1273212416E-04 -0.1199783198E-04 -0.1129889760E-04 -0.1063114432E-04 -0.9993771076E-05 -0.9385976783E-05 -0.8806960361E-05 -0.8255920731E-05 -0.7732056813E-05 -0.7234567528E-05 -0.6762651796E-05 -0.6315508537E-05 -0.5892336672E-05 -0.5492335122E-05 -0.5114702806E-05 -0.4758638645E-05 -0.4423341560E-05 -0.4108010470E-05 -0.3811844297E-05 -0.3534041960E-05 -0.3273802380E-05 -0.3030324478E-05 -0.2802840933E-05 -0.2590719464E-05 -0.2393361547E-05 -0.2210168661E-05 -0.2040542283E-05 -0.1883883891E-05 -0.1739594962E-05 -0.1607076974E-05 -0.1485731405E-05 -0.1374959732E-05 -0.1274163432E-05 -0.1182745983E-05 -0.1100102864E-05 -0.1025641550E-05 -0.9587615207E-06 -0.8988642528E-06 -0.8453512241E-06 -0.7976239120E-06 -0.7550837943E-06 -0.7171323480E-06 -0.6831710520E-06 -0.6526013826E-06 -0.6248248178E-06 -0.5992428352E-06 -0.5752569124E-06 -0.5522685270E-06 -0.5296791565E-06 -0.5068902785E-06 -0.4833033770E-06 -0.4583199105E-06 -0.4313413757E-06 -0.4017692436E-06 -0.3690049920E-06 -0.3324500985E-06 -0.2915060405E-06 -0.2455742957E-06 -0.1940563417E-06 -0.1363536560E-06 -0.7186771624E-07 -0.4160302859E-21

4 0

-0.9047477071E+03 -0.8886260205E+02 -0.1082261665E+04 -0.2381190745E+04 -0.3065286508E+04 -0.3262983442E+04 -0.3602751632E+04 -0.3675505230E+04 -0.3471972452E+04 -0.2485509539E+04 -0.1459111725E+04 -0.6412860076E+03 -0.2563114782E+03 -0.9315760274E+02 -0.2846805272E+02 -0.4796026425E+01 -0.2731225666E+01 -0.4320611166E+01 -0.3962007148E+01 -0.3128321714E+01 -0.2315302257E+01 -0.1657039282E+01 -0.1163227690E+01 -0.807085319E+00 -0.5562038280E+00 -0.3821900447E+00 -0.2627556824E+00 -0.1813516072E+00 -0.1260714170E+00 -0.8855257954E+01 -0.6301638568E+01 -0.4553210258E+01 -0.3340678708E+01 -0.2499512217E+01 -0.1900268794E+01 -0.1466790296E+01 -0.1143418737E+01 -0.9032129108E+02 -0.7264108067E+02 -0.5932504147E+02 -0.4866904995E+02 -0.4005729262E+02 -0.3314603348E+02 -0.2759153655E+02 -0.230799443E+02 -0.194169143E+02 -0.1643798126E+02 -0.1397868142E+02 -0.1189601166E+02 -0.8653394588E+03 -0.7422055529E+03 -0.6403101624E+03 -0.5560837000E+03 -0.4859565783E+03 -0.4263592098E+03 -0.3742192200E+03 -0.3284530854E+03 -0.2884744952E+03 -0.2536971387E+03 -0.2235347051E+03 -0.1974008837E+03 -0.1747093636E+03 -0.1548738343E+03 -0.1373721764E+03 -0.1219390365E+03 -0.1083732530E+03 -0.9647366379E+03 -0.8603910722E+04 -0.7686842141E+04 -0.6876044452E+04 -0.6151401472E+04 -0.5495579696E+04 -0.4902376328E+04 -0.4368371251E+04 -0.3890144346E+04 -0.3464275498E+04 -0.3087344587E+04 -0.2755931497E+04 -0.2466616110E+04 -0.2215978309E+04 -0.2000597975E+04 -0.1817054992E+04 -0.1661929241E+04 -0.1531800606E+04 -0.1423248968E+04 -0.1332854210E+04 -0.1257196215E+04 -0.1192854866E+04 -0.1136410043E+04 -0.1084441631E+04 -0.1033529511E+04 -0.9808674035E+05 -0.9261043821E+05 -0.8695033575E+05 -0.8113272404E+05 -0.7518389418E+05 -0.6913013726E+05 -0.6299774438E+05 -0.5681300663E+05 -0.5060221509E+05 -0.4449166085E+05 -0.3820763502E+05 -0.3207642868E+05 -0.2602433919E+05 -0.2007763883E+05 -0.142623750E+05 -0.8605620035E+06 -0.3132877515E+06 -0.2129298967E+06 -0.154618319E+06 -0.1191678945E+06 -0.1639571211E+06 -0.205964943E+06 -0.2452865539E+06 -0.2820438396E+06 -0.3163408912E+06 -0.3482862483E+06 -0.3779884507E+06 -0.4055560382E+06 -0.4310975505E+06 -0.4547215274E+06 -0.4765365086E+06 -0.4966510338E+06 -0.5151736427E+06 -0.5322128752E+06 -0.5478772710E+06 -0.5622753698E+06 -0.5755157113E+06 -0.5877068353E+06 -0.5989572816E+06 -0.6093755898E+06 -0.6190702997E+06 -0.6281499511E+06 -0.6367230837E+06 -0.6448982373E+06 -0.6527839515E+06 -0.6604887662E+06 -0.6681212210E+06 -0.6757898558E+06 -0.6836032102E+06 -0.6916698240E+06 -0.7000982369E+06 -0.7089969888E+06 -0.7184746192E+06 -0.7286396681E+06 -0.7396006750E+06 -0.7514661798E+06 -0.7643447222E+06 -0.7783448419E+06 -0.7935750787E+06 -0.8101439723E+05

4 2

0.2007624154E+04 -0.1818111968E+04 -0.1449448701E+04 -0.7719483824E+03 -0.5342576737E+03 -0.2115812078E+04 -0.2531693498E+04 -0.1872856075E+04 -0.8754387939E+03 -0.3460048997E+03 -0.1279136422E+03 -0.4101023644E+02 -0.9091055154E+01 -0.1013548490E+01 -0.3182818046E+01 -0.2903672081E+01 -0.2136647598E+01 -0.1466101307E+01 -0.9945247981E+00 -0.6871445297E+00 -0.4895820816E+00 -0.3595794075E+00 -0.2701657034E+00 -0.2056530229E+00 -0.1572703402E+00 -0.1200961734E+00 -0.9123916318E+01 -0.6882299281E+01 -0.5150442279E+01 -0.3823772000E+01 -0.2817649427E+01 -0.2062100701E+01 -0.1499641845E+01 -0.1086361136E+01 -0.7838138981E+02 -0.5636349302E+02 -0.4024940882E+02 -0.2871219854E+02 -0.2067644244E+02 -0.1506672081E+02 -0.1094650983E+02 -0.7934869495E+02 -0.5789755699E+02 -0.4269124355E+02 -0.3158699161E+03 -0.2355274971E+03 -0.1783414427E+03 -0.1043578774E+03 -0.7903925251E+03 -0.5983476392E+04 -0.4576703330E+04 -0.3585868231E+04 -0.2913233259E+04 -0.2461060577E+04 -0.2131612350E+04 -0.1843378822E+04 -0.1579762553E+04 -0.1340394184E+04 -0.1124904357E+04 -0.9329237106E+05 -0.7640828866E+05 -0.6180125253E+05 -0.4943432675E+05 -0.3922654631E+05 -0.3100082995E+05 -0.2448606735E+05 -0.1945114819E+05 -0.1565496214E+05 -0.1285639888E+05 -0.1081434809E+05 -0.9287769945E+06 -0.8072179152E+06 -0.7110859434E+06 -0.6386469059E+06 -0.5870456786E+06 -0.5551191375E+06 -0.5405761585E+06 -0.5414076175E+06 -0.5556043905E+06 -0.5811573534E+06 -0.6160573820E+06 -0.6582953524E+06 -0.7058621405E+06 -0.7567486222E+06 -0.8089456734E+06 -0.8604441700E+06 -0.9092349881E+06 -0.9533090034E+06 -0.9906570920E+06 -0.1019270130E+06 -0.1037138993E+06 -0.1042744294E+06 -0.1036525595E+06 -0.1019412197E+06 -0.9923333971E+06 -0.9562184960E+06 -0.9119967927E+06 -0.8605951865E+06 -0.8029501769E+06 -0.7399838632E+06 -0.6726279447E+06 -0.6018117208E+06 -0.5284644909E+06 -0.4535155542E+06 -0.3778942103E+06 -0.3525297584E+06 -0.32687281E+06 -0.8727074833E+07 -0.2222668581E+07 -0.3791364333E+07 -0.9241279413E+07 -0.1412979826E+06 -0.1847879344E+06 -0.2231013756E+06 -0.2564570318E+06 -0.2850736288E+06 -0.3091698926E+06 -0.3289645488E+06 -0.3446763233E+06 -0.3565239418E+06 -0.3647261303E+06 -0.3695016145E+06 -0.3771069120E+06 -0.3696473732E+06 -0.3654550993E+06 -0.3587110244E+06 -0.3496388742E+06 -0.3384423745E+06 -0.3253552512E+06 -0.3105912300E+06 -0.2943690368E+06 -0.2769073973E+06 -0.2584250374E+06 -0.2391406829E+06 -0.2192730596E+06 -0.1990403933E+06 -0.1786629097E+06 -0.1583578348E+06 -0.1384343943E+06 -0.1188413139E+06 -0.1000673197E+06 -0.8224113719E+07 -0.6558149236E+07 -0.5030711097E+07 -0.3663671883E+07 -0.2478904173E+07 -0.1498280550E+07 -0.7436735924E+08 -0.2369558824E+08 -0.1268477234E+19

4 4

-0.1590414613E+04 -0.4928554379E+03 -0.8976957790E+03 -0.1770559732E+04 -0.1857460098E+04 -0.1396087704E+04 -0.1247236567E+04 -0.9448270264E+03 -0.4572699231E+03 -0.1842127104E+03 -0.6933150294E+02 -0.2259279695E+02 -0.5157521552E+01 -0.4549600592E+00 -0.1694474912E+01 -0.1556085822E+01 -0.1130563447E+01 -0.7516589707E+00 -0.4831479871E+00 -0.3091547253E+00 -0.2003704186E+00 -0.1327648743E+00 -0.9019790271E+01 -0.6274180598E+01 -0.4449759809E+01 -0.3202193412E+01 -0.2327790185E+01 -0.1703202926E+01 -0.1251506781E+01 -0.9221838799E+02 -0.6809392326E+02 -0.5036976368E+02 -0.3731586717E+02 -0.2775969847E+02 -0.2072099547E+02 -0.1553009929E+02 -0.1165469423E+02 -0.8801234136E+03 -0.6735865247E+03 -0.5224733802E+03 -0.406431586E+03 -0.3172532568E+03 -0.2497556268E+03 -0.1987622201E+03 -0.1596010499E+03 -0.1296243751E+03 -0.1066905158E+03 -0.8865779245E+04 -0.7369412946E+04 -0.6120586873E+04 -0.5090895647E+04 -0.4251933885E+04 -0.3575296208E+04 -0.3032577235E+04 -0.2595371583E+04 -0.2235273874E+04 -0.1927817752E+04 -0.1664292971E+04 -0.1439928311E+04 -0.1249952510E+04 -0.1089594470E+04 -0.9540828497E+05 -0.8386464688E+05 -0.7385141072E+05 -0.6495651303E+05 -0.5702812448E+05 -0.4997974743E+05 -0.4372379178E+05 -0.3817430611E+05 -0.3324424654E+05 -0.2884684230E+05 -0.2489532264E+05 -0.2131471150E+05 -0.1807721167E+05 -0.1516682064E+05 -0.1256753590E+05 -0.1026335496E+05 -0.8238275295E+06 -0.6476294411E+06 -0.4961409799E+06 -0.3677618954E+06 -0.2608919370E+06 -0.1739308541E+06 -0.1052783961E+06 -0.5333431251E+06 -0.1649835272E+06 -0.6829733847E+06 -0.1825019776E+07 -0.1936328859E+07 -0.1176925992E+07 -0.2931640688E+08 -0.2313916166E+07 -0.4745401317E+07 -0.7528075276E+07 -0.1062248960E+06 -0.1398919607E+06 -0.1758874640E+06 -0.2138169231E+06 -0.2532885875E+06 -0.2938997777E+06 -0.3352642075E+06 -0.3769486620E+06 -0.4186666584E+06 -0.4599157139E+06 -0.5003373457E+06 -0.5395370709E+06 -0.5771204696E+06 -0.6129828502E+06 -0.6458599797E+06 -0.6762272511E+06 -0.7034002019E+06 -0.7269843495E+06 -0.7466758538E+06 -0.7625334452E+06 -0.7747064970E+06 -0.7834348252E+06 -0.7885964748E+06 -0.7906121472E+06 -0.7895407729E+06 -0.7855317252E+06 -0.7787343772E+06 -0.7692981022E+06 -0.7573722735E+06 -0.7431062642E+06 -0.7266494475E+06 -0.7126004777E+06 -0.6877608852E+06 -0.6656278859E+06 -0.6419015725E+06 -0.6167713174E+06 -0.5902664946E+06 -0.5626564770E+06 -0.5340560380E+06 -0.5045983506E+06 -0.4744489882E+06 -0.4437519240E+06 -0.4126565311E+06 -0.3813121829E+06 -0.3498682525E+06 -0.3184741132E+06 -0.2872791382E+06 -0.2564327007E+06 -0.2260841740E+06 -0.1963829313E+06 -0.1674783458E+06 -0.1395197907E+06 -0.1126566393E+06 -0.8703826472E+07 -0.6281404030E+07 -0.4013333922E+07 -0.1914553471E+07 -0.3508162382E+20

5 0

0.6928458839E+02 -0.1279721964E+03 -0.7834134573E+03 -0.1575547213E+04 -0.1830393798E+04 -0.1651092927E+04 -0.1454886670E+04 -0.1342888715E+04 -0.1095421143E+04 -0.1094928881E+04 -0.8527863672E+03 -0.3953978199E+03 -0.1663183971E+03 -0.6640272775E+02 -0.2496126612E+02 -0.8402230436E+01 -0.2045897365E+01 -0.227549767E+00 -0.9036268417E+00 -0.9790179930E+00 -0.880547587E+00 -0.6747725230E+00 -0.5093379833E+00 -0.372261570E+00 -0.2671180923E+00 -0.1887130976E+00 -0.1320686412E+00 -0.9192787739E+01 -0.6386581778E+01 -0.4442617767E+01 -0.3103367505E+01 -0.2182260966E+01 -0.1546333348E+01 -0.1110515759E+01 -0.8064732182E+02 -0.5927532476E+02 -0.4385622887E+02 -0.3288180918E+02 -0.2523666894E+02 -0.1980541141E+02 -0.1562960429E+02 -0.1237867322E+02 -0.9879008278E+03 -0.7956999570E+03 -0.6455841054E+03 -0.5285942164E+03 -0.4374516201E+03 -0.3648776466E+03 -0.3046069802E+03 -0.2544277217E+03 -0.2131413264E+03 -0.1795492491E+03 -0.1524529449E+03 -0.1306538690E+03 -0.1129534763E+03 -0.9815322187E+04 -0.8523274351E+04 -0.7388440967E+04 -0.6397877150E+04 -0.5538638017E+04 -0.4797778683E+04 -0.4162354264E+04 -0.3619419877E+04 -0.3156030636E+04 -0.2760223307E+04 -0.2423961248E+04 -0.2140189464E+04 -0.1901852961E+04 -0.1701896746E+04 -0.1533265825E+04 -0.1388905204E+04 -0.1261759889E+04 -0.1145864872E+04 -0.1039615083E+04 -0.9424945390E+05 -0.8539908570E+05 -0.7735862533E+05 -0.7007665444E+05 -0.6350166467E+05 -0.5758214768E+05 -0.5226659512E+05 -0.4750349864E+05 -0.4324134989E+05 -0.3942864051E+05 -0.3601386217E+05 -0.3294550650E+05 -0.3017206517E+05 -0.2764202982E+05 -0.2530389210E+05 -0.2310614367E+05 -0.2099727616E+05 -0.1892578125E+05 -0.1684995613E+05 -0.1476732030E+05 -0.1268519879E+05 -0.1061091667E+05 -0.8551798975E+05 -0.6551705756E+06 -0.4508357062E+06 -0.2538682941E+06 -0.6134734415E+07 -0.1259946389E+06 -0.3074251501E+06 -0.4822116847E+06 -0.6496217379E+06 -0.8089228047E+06 -0.9913827960E+06 -0.1100267960E+06 -0.1230847039E+06 -0.1350387113E+06 -0.1458155676E+06 -0.1553420223E+06 -0.1635653063E+06 -0.1705145753E+06 -0.1762394661E+06 -0.1807896157E+06 -0.1842146612E+06 -0.1865642394E+06 -0.1878879873E+06 -0.1882355418E

0.3166982430E-04 0.2660541106E-04 0.2274162938E-04 0.1967290779E-04 0.1705603963E-04 0.1479727756E-04 0.1286523908E-04 0.1122854167E-04 0.9855802832E-05 0.8715640059E-05 0.181716670845E-05 0.7007512682E-05 0.6378752547E-05 0.5868855341E-05 0.5458255450E-05 0.5127387258E-05 0.485685150E-05 0.4626583509E-05 0.4417516721E-05 0.4209919170E-05 0.3987878887E-05 0.3750098481E-05 0.349893421E-05 0.3236742332E-05 0.2965879101E-05 0.2688700775E-05 0.2407563610E-05 0.2124823863E-05 0.1842837917E-05 0.1563961650E-05 0.1290551696E-05 0.1024964187E-05 0.7695533782E-06 0.5266815272E-06 0.2986988902E-06 0.8276372392E-07 0.1031677151E-06 -0.2723391703E-06 -0.4171943851E-06 -0.5353771028E-06 -0.6252493649E-06 -0.6880464050E-06 -0.7257217548E-06 -0.7402289458E-06 -0.7335215097E-06 -0.705529782E-06 -0.6642768828E-06 -0.6056467552E-06 -0.5336161271E-06 -0.4501385300E-06 -0.3571674956E-06 -0.2566565555E-06 -0.1505592414E-06 -0.4082908482E-07 0.707838249E-07 0.1817162900E-06 0.2906321229E-06 0.3953493328E-06 0.4939407269E-06 0.5844437736E-06 0.6652932917E-06 0.7364775012E-06 0.7983729726E-06 0.8513562763E-06 0.8958039830E-06 0.9320926629E-06 0.9605988866E-06 0.9816992245E-06 0.9957702471E-06 0.1003188525E-05 0.1004330628E-05 0.9995731276E-06 0.9892925936E-06 0.9738655966E-06 0.9536687071E-06 0.9290784955E-06 0.9004715322E-06 0.8682243879E-06 0.8327136328E-06 0.7943158376E-06 0.7534075262E-06 0.7103654083E-06 0.6655659151E-06 0.6193856636E-06 0.5722012242E-06 0.5243891674E-06 0.4763260636E-06 0.4283884833E-06 0.3809529969E-06 0.3343961749E-06 0.2890945879E-06 0.2454248061E-06 0.2037634002E-06 0.1644869405E-06 0.1297971997E-06 0.9459514182E-07 0.6473294372E-07 0.3876197374E-07 0.1705880235E-07 0.4939339803E-21

5 4

-0.9280922413E+03 -0.1802165799E+04 -0.2187229554E+04 -0.1580876358E+04 -0.3405949043E+03 0.9803099718E+03 0.1944262728E+04 0.1827196989E+04 0.9233507699E+03 0.3821249632E+03 0.1506330131E+03 0.5394170562E+02 0.1625569127E+02 0.2976916133E+01 -0.8865051460E+00 -0.1506279765E+01 -0.1226097505E+01 -0.8294707605E+00 -0.5216599591E+00 -0.3203349358E+00 -0.1978415512E+00 -0.1252613923E+00 -0.8212126235E-01 -0.5582694753E-01 -0.3916484970E-01 -0.2813184965E-01 -0.2051735345E-01 -0.1509874709E-01 -0.1115359052E-01 -0.8249677655E-02 -0.6094743889E-02 -0.4502330796E-02 -0.3318684665E-02 -0.2445714235E-02 -0.1804159647E-02 -0.1333436879E-02 -0.9834187993E-03 -0.7271300074E-03 -0.5433830342E-03 -0.4109904110E-03 -0.3114276531E-03 -0.2368222111E-03 -0.1819645201E-03 -0.1416450147E-03 -0.1112263654E-03 -0.8836018492E-04 -0.7127032149E-04 -0.5818062344E-04 -0.4756814498E-04 -0.3892276396E-04 -0.3198756410E-04 -0.2650562917E-04 -0.2222004291E-04 -0.1887388905E-04 -0.1621025135E-04 -0.1397221355E-04 -0.1194590842E-04 -0.1008966482E-04 -0.8404860629E-05 -0.6892873732E-05 -0.5555082011E-05 -0.4392863348E-05 -0.3407595624E-05 -0.2600656723E-05 -0.1969759255E-05 -0.1497954743E-05 -0.1164962435E-05 -0.9491695935E-06 -0.8309614600E-06 -0.7893912894E-06 -0.8038453336E-06 -0.8537098442E-06 -0.9215005926E-06 -0.1002251429E-05 -0.1094125724E-05 -0.1195286847E-05 -0.1303898168E-05 -0.1418123058E-05 -0.1536124886E-05 -0.1656067022E-05 -0.1776112837E-05 -0.1894425700E-05 -0.2009168981E-05 -0.2118506052E-05 -0.2226000280E-05 -0.2313615038E-05 -0.2395713694E-05 -0.2465059619E-05 -0.2519816182E-05 -0.2558146755E-05 -0.2578214706E-05 -0.2578183406E-05 -0.2556799000E-05 -0.2515138730E-05 -0.2454862614E-05 -0.2377630669E-05 -0.2285102915E-05 -0.2178939366E-05 -0.2068000434E-05 -0.1932344961E-05 -0.1795234139E-05 -0.1651127595E-05 -0.1501685345E-05 -0.1348567407E-05 -0.1193433800E-05 -0.1037944540E-05 -0.8837596455E-06 0.7325391336E-06 -0.5859430221E-06 -0.4456313286E-06 -0.3132640706E-06 -0.1905012658E-06 -0.7865585916E-07 0.2234749438E-07 0.1129312125E-06 0.1935177128E-06 0.2645294130E-06 0.3263887307E-06 0.3795180836E-06 0.4243398893E-06 0.4612765655E-06 0.4907505298E-06 0.5131842000E-06 0.5289999935E-06 0.5386203282E-06 0.542676216E-06 0.5409642914E-06 0.5345327552E-06 0.5235954308E-06 0.5085747357E-06 0.4898930876E-06 0.4679729042E-06 0.4432366030E-06 0.4161066019E-06 0.3870053184E-06 0.3653551701E-06 0.3245785748E-06 0.2920979501E-06 0.259337136E-06 0.2267142829E-06 0.1946560758E-06 0.1635835099E-06 0.1339190029E-06 0.1060849723E-06 0.850338951E-07 0.579801130E-07 0.3778991614E-07 0.2150196809E-07 0.9156584796E-08 0.1176183915E-08 -0.2016816902E-08 -0.2310981608E-21

6 0

-0.5908448135E+03 -0.1293866837E+04 -0.1562926537E+04 -0.1243159868E+04 -0.7681320908E+03 0.1526442839E+03 0.1282573593E+04 0.2055256633E+04 0.2366428757E+04 0.1919488919E+04 0.1208655518E+04 0.5389808092E+03 0.2193524681E+03 0.8375951942E+02 0.2947347536E+02 0.8926576307E+01 0.1693712481E+01 0.15418205500E+00 -0.1018765976E+01 -0.9428353367E+00 -0.7378742308E+00 -0.5391065804E+00 -0.3804714467E+00 -0.2632028507E+00 -0.1797625300E+00 -0.1217258405E+00 -0.8196670486E-01 -0.5503261587E-01 -0.3693263646E-01 -0.2484262259E-01 -0.1679436809E-01 -0.1144057320E-01 -0.7859431325E-02 -0.5487150695E-02 -0.3880662409E-02 -0.2783318694E-02 -0.2009717603E-02 -0.1473019389E-02 -0.1111024855E-02 -0.8615348020E-02 -0.6714129779E-03 -0.5237749102E-03 -0.4107990717E-03 -0.3246639543E-03 -0.2582635349E-03 -0.2073541474E-03 -0.1684076111E-03 -0.1378957641E-03 -0.1127917037E-03 -0.9207356440E-04 -0.7522074014E-04 -0.6171262472E-04 -0.5102861797E-04 -0.4264809573E-04 -0.3605046983E-04 -0.3071512811E-04 -0.2619686847E-04 -0.2235210504E-04 -0.1911265599E-04 -0.1641033952E-04 -0.1417697381E-04 -0.1234437705E-04 -0.1084436742E-04 -0.9608763106E-05 -0.8576764918E-05 -0.7717104120E-05 -0.7005894595E-05 -0.6419250230E-05 -0.5933284907E-05 -0.5524112511E-05 -0.5167846928E-05 -0.4840602040E-05 -0.4522677871E-05 -0.4211118993E-05 -0.3907156117E-05 -0.3612019953E-05 -0.3326941211E-05 -0.3053150603E-05 -0.2791878838E-05 -0.2544356628E-05 -0.2311814682E-05 -0.2095483712E-05 -0.1896594427E-05 -0.1716377539E-05 -0.1556063757E-05 -0.1416883793E-05 -0.1300668357E-05 -0.1206848158E-05 -0.1138453909E-05 -0.1096116319E-05 -0.1081066099E-05 -0.1094533959E-05 -0.1137139676E-05 -0.1207059286E-05 -0.1301857894E-05 -0.1419100603E-05 -0.1556352515E-05 -0.1711178734E-05 -0.1881144362E-05 -0.2063814504E-05 -0.2256754262E-05 -0.2457528740E-05 -0.2663703041E-05 -0.2872842267E-05 -0.3082511523E-05 -0.3290275910E-05 -0.3493700534E-05 -0.3690530495E-05 -0.3877790899E-05 -0.4053586848E-05 -0.4215303444E-05 -0.4360550792E-05 -0.4487283243E-05 -0.4595822142E-05 -0.4686833801E-05 -0.4761026653E-05 -0.4819113451E-05 -0.4861804069E-05 -0.4888909099E-05 -0.4903839135E-05 -0.4904604768E-05 -0.4892816593E-05 -0.4869185202E-05 -0.4834421188E-05 -0.4789231435E-05 -0.4734373662E-05 -0.4670439337E-05 -0.4598250760E-05 -0.4518482525E-05 -0.4431845225E-05 -0.4339049453E-05 -0.4240805802E-05 -0.4137824864E-05 -0.4030817423E-05 -0.3920493501E-05 -0.3807564261E-05 -0.3692740107E-05 -0.3576731632E-05 -0.3460249428E-05 -0.3344004088E-05 -0.3228706206E-05 -0.3115066374E-05 -0.3003795184E-05 -0.2895603323E-05 -0.2791201108E-05 -0.2691299406E-05 -0.2596608719E-05 -0.2507839640E-05 -0.2425702762E-05 -0.2350908678E-05 -0.2284167981E-05 -0.2226191264E-05

6 2

0.4028583628E+03 0.1162071277E+04 0.1382889695E+04 0.1119054168E+04 0.9667248444E+03 0.6649888696E+03 0.2795085884E+03 0.2012475142E+03 0.172446503E+03 0.9714691562E+02 0.4807593405E+02 0.2127246928E+02 0.9138337772E+01 0.3589715117E+01 0.1310815996E+01 0.4355810192E+00 0.1244463227E+00 0.2517547875E-01 -0.5497476254E-02 -0.3591742263E-02 -0.1219025001E-02 0.938949836E-02 0.3076049232E-02 0.3840683940E-02 0.3964358402E-02 0.3701866374E-02 0.3245507949E-02 0.2723367158E-02 0.2209684681E-02 0.1745800895E-02 0.1350653777E-02 0.1024866803E-02 0.7674980824E-03 0.5685859982E-03 0.4162892235E-03 0.3013492660E-03 0.2157142314E-03 0.1535758406E-03 0.1096867144E-03 0.7879947374E-04 0.5630040656E-04 0.4011046854E-04 0.2878428233E-04 0.2087647057E-04 0.1512052609E-04 0.1096542235E-04 0.8039003006E-05 0.5969111678E-05 0.4433648788E-05 0.3310741878E-05 0.2528575270E-05 0.2015333288E-05 0.1699200255E-05 0.1508360494E-05 0.1370998328E-05 0.1215298080E-05 0.9854563280E-06 0.6897186635E-06 0.3523429339E-06 -0.2413014176E-08 -0.3502913339E-06 -0.6670341785E-06 -0.108387012E-06 -0.1110082055E-05 -0.1194317694E-05 -0.1189064272E-05 -0.1108741743E-05 -0.9677700607E-06 -0.7805691804E-06 -0.5615590559E-06 -0.3251596415E-06 -0.8579089134E-07 0.1444597894E-06 0.3628351922E-06 0.5689106579E-06 0.7622615272E-06 0.9424631407E-06 0.1109090839E-05 0.1261719963E-05 0.13999255854E-05 0.1523838525E-05 0.1631369297E-05 0.1723757531E-05 0.1800023894E-05 0.1859743727E-05 0.1902492371E-05 0.1927845166E-05 0.1935377453E-05 0.1924664573E-05 0.1895281867E-05 0.1848680474E-05 0.1778808336E-05 0.1691235282E-05 0.1585496290E-05 0.1463369229E-05 0.1326631965E-05 0.1177062365E-05 0.1016438298E-05 0.8465376290E-06 0.6691382266E-06 0.4860179579E-06 0.2989546899E-06 0.1097262901E-06 -0.7988937449E-07 -0.2681144365E-06 -0.4531710286E-06 -0.6332812837E-06 -0.8066673345E-06 -0.9715513137E-06 -0.1126155354E-06 -0.1268701588E-05 -0.1397412149E-05 -0.1510903066E-05 -0.1609365949E-05 -0.1693386308E-05 -0.1763549649E-05 -0.1820441481E-05 -0.1864647311E-05 -0.1896752647E-05 -0.1917324997E-05 -0.1927003868E-05 -0.1926320769E-05 -0.1915879207E-05 -0.1896264690E-05 -0.1868062726E-05 -0.1831858822E-05 -0.1788238486E-05 -0.1737787226E-05 -0.1681090550E-05 -0.1627393966E-05 -0.1551302981E-05 -0.1479383103E-05 -0.1403559840E-05 -0.1324418700E-05 -0.1242545189E-05 -0.1158524818E-05 -0.1072943092E-05 -0.9863855194E-06 -0.8994376086E-06 -0.8126848671E-06 -0.7267128027E-06 -0.6421069230E-06 -0.5594527359E-06 -0.4793357491E-06 -0.4023414705E-06 -0.3290554078E-06 -0.2600630687E-06 -0.1959499610E-06 -0.1373015925E-06 -0.8470347101E-07 -0.3874110425E-07 0.4179694297E-20

6 4

0.2726256467E+03 -0.3082565576E+03 -0.8613284751E+03 -0.1639349714E+03 -0.1199245898E+04 0.5529007980E+03 0.2161106247E+04 0.2257420413E+04 0.1142475347E+04 0.4771189454E+03 0.1862063459E+03 0.6757282058E+02 0.2117644590E+02 0.4607300511E+01 -0.4181703483E+00 -0.1216421322E+01 -0.8308997212E+00 -0.5161424266E+00 -0.3080526604E+00 -0.1823059405E+00 -0.1093556435E+00 -0.6749456378E-01 -0.4322956571E-01 -0.2875275517E-01 -0.1976407083E-01 -0.1393617393E-01 -0.9991568986E-02 -0.7373695949E-02 -0.5277234050E-02 -0.3851817085E-02 -0.2811752596E-02 -0.2047137636E-02 -0.1489247138E-02 -0.1082653055E-02 -0.7867585815E-03 -0.5690247574E-03 -0.4115569609E-03 -0.3003030045E-03 -0.2211999009E-03 -0.1620536192E-03 -0.118073552E-03 -0.8631176080E-04 -0.6383948833E-04 -0.4796741875E-04 -0.3701834848E-04 -0.2956730274E-04 -0.2418930679E-04 -0.1968987652E-04 -0.1579641851E-04 -0.1246687492E-04 -0.9659151969E-05 -0.7331164847E-05 -0.5440828761E-05 -0.3946058909E-05 -0.2804770492E-05 -0.1974600219E-05 -0.1420780754E-05 -0.1073426554E-05 -0.9149116489E-06 -0.8927703544E-06 -0.9632469138E-06 -0.1082585571E-05 -0.1207030569E-05 -0.1301124658E-05 -0.1362604616E-05 -0.1397505729E-05 -0.1411863279E-05 -0.1411712551E-05 -0.1403088831E-05 -0.1392027402E-05 -0.1384563549E-05 -0.1385531703E-05 -0.1394962882E-05 -0.1411687251E-05 -0.1434534975E-05 -0.1462336219E-05 -0.1493921148E-05 -0.1528119926E-05 -0.156376719E-05 -0.1599679691E-05 -0.1634701007E-05 -0.1667656832E-05 -0.1697377332E-05 -0.172629670E-05 -0.1742433012E-05 -0.1755428523E-05 -0.1760509367E-05 -0.1756055709E-05 -0.1742247715E-05 -0.1716565549E-05 -0.1678289377E-05 -0.1626639420E-05 -0.1562396133E-05 -0.1486730028E-05 -0.1400811617E-05 -0.1305811413E-05 -0.1202899928E-05 -0.1093247673E-05 -0.9780251612E-06 -0.8584029042E-06 -0.7355514142E-06 -0.6106412033E-06 -0.4848427837E-06 -0.3593266676E-06 -0.2352633670E-06 -0.1138233940E-06 0.3822739203E-08 0.1165045205E-06 0.2230514378E-06 0.3222929789E-06 0.4130586318E-06 0.4944332597E-06 0.5665232272E-06 0.6296902743E-06 0.6842961411E-06 0.7307025675E-06 0.7692712937E-06 0.8003640595E-06 0.8243426051E-06 0.8415686704E-06 0.8524039955E-06 0.8572103203E-06 0.8563493848E-06 0.8501829292E-06 0.8390726934E-06 0.8233804174E-06 0.8034678412E-06 0.7796967049E-06 0.7524287484E-06 0.7220257118E-06 0.6888493351E-06 0.6532613583E-06 0.6156232514E-06 0.5762975645E-06 0.5356452275E-06 0.4940282504E-06 0.4518083734E-06 0.4093473363E-06 0.3670068792E-06 0.3251487422E-06 0.2841346652E-06 0.2443263882E-06 0.2060856513E-06 0.1697741944E-06 0.1357537577E-06 0.1043860811E-06 0.7603290456E-07 0.5105596819E-07 0.2981701196E-07 0.126777589E-07 -0.1478850568E-19

6 6

0.1424575762E+02 0.7265923080E+03 0.5089795770E+03 -0.1071686312E+03 -0.4093078179E+03 -0.1927285753E+03 -0.3855214122E+03 -0.5120347677E+03 -0.2722902237E+03 -0.1117901055E+03 -0.4440997458E+02 -0.1612394905E+02 -0.509386310E+01 -0.1125331702E+01 0.8498940658E-01 0.3261444878E+00 0.2850050043E+00 0

0.2168334674E-06 -0.2013094422E-06 -0.1853898290E-06 -0.1692229734E-06 -0.1259572208E-06 -0.1367409167E-06 -0.1207224066E-06 -0.1050503359E-06 -0.8987215007E-07 -0.7533709461E-07 -0.6159321498E-07 -0.4878885664E-07 -0.3707236507E-07 -0.2659208572E-07 -0.1749636408E-07 -0.9933545594E-08 -0.4051975747E-08 0.5438720492E-20

7 0

0.1038659601E+03 0.6841826856E+03 0.1239613177E+04 0.1534177257E+04 0.1649418817E+04 0.1452418082E+04 0.1037162690E+04 0.7935746745E+03 0.4007680569E+03 -0.3035182864E+03 -0.48181349801E+03 -0.2384525910E+03 -0.1032973383E+03 -0.4325348818E+02 -0.1783277040E+02 -0.7281228406E+01 -0.2916800926E+01 -0.1106249682E+01 -0.3575681654E+00 -0.5684631839E-01 0.5291629304E-01 0.8207979834E-01 0.7909898809E-01 0.6535014357E-01 0.4995671608E-01 0.3643556520E-01 0.2575234096E-01 0.1781240578E-01 0.1213976538E-01 0.8193772729E-02 0.5501458089E-02 0.3690254076E-02 0.2477580328E-02 0.1679191684E-02 0.1147005223E-02 0.7917449607E-03 0.5476065786E-03 0.3838654837E-03 0.2785670141E-03 0.2097565084E-03 0.1587539058E-03 0.1199775497E-03 0.9112038394E-04 0.6987535282E-04 0.5413862971E-04 0.4261930511E-04 0.3422969881E-04 0.2788213059E-04 0.2265440078E-04 0.1828623191E-04 0.1468282702E-04 0.1174938917E-04 0.93911121430E-05 0.7513226849E-05 0.6020908489E-05 0.4819369408E-05 0.3826360819E-05 0.3009826562E-05 0.2350258632E-05 0.1828149021E-05 0.1423989725E-05 0.1118272738E-05 0.8914900548E-06 0.7241336689E-06 0.5992071684E-06 0.5097605153E-06 0.4513552647E-06 0.4195529719E-06 0.4099151921E-06 0.4180034807E-06 0.4393793929E-06 0.4696044840E-06 0.5049526478E-06 0.5445471328E-06 0.5882235626E-06 0.6358174151E-06 0.6871643866E-06 0.7421000277E-06 0.8004599257E-06 0.8620796675E-06 0.9267948405E-06 0.9944410315E-06 0.1064853828E-05 0.1137868817E-05 0.1213321585E-05 0.1291047720E-05 0.1370882808E-05 0.1452662438E-05 0.1536222195E-05 0.1621397667E-05 0.1708024442E-05 0.1795938106E-05 0.1884920450E-05 0.1974538081E-05 0.2064303807E-05 0.2153730440E-05 0.2242330788E-05 0.2329617663E-05 0.2415103873E-05 0.2498302229E-05 0.2578725540E-05 0.2655886616E-05 0.2729298268E-05 0.2798473305E-05 0.2862924537E-05 0.2922164774E-05 0.2975706826E-05 0.3021036350E-05 0.3063747613E-05 0.3097271968E-05 0.3123149377E-05 0.3140892651E-05 0.3150149681E-05 0.3151108684E-05 0.3144092960E-05 0.312945810E-05 0.3160743053E-05 0.3078430429E-05 0.3042748797E-05 0.3000708937E-05 0.2952634149E-05 0.2898847732E-05 0.2839672987E-05 0.2797543321E-05 0.2706451710E-05 0.2633051777E-05 0.2555556714E-05 0.2474289821E-05 0.2389574398E-05 0.2301733744E-05 0.2211091159E-05 0.2117969943E-05 0.2022693395E-05 0.1925584816E-05 0.1826967505E-05 0.1727164761E-05 0.1626499885E-05 0.1525296176E-05 0.1423876934E-05 0.1322565458E-05 0.1221685049E-05 0.1121559005E-05 0.1022510628E-05 0.9248632154E-06 0.8289400684E-06 0.7350644864E-06 0.6435597690E-06 0.5547492159E-06 0.4689561269E-06 0.3865038017E-06 0.3077155400E-06 0.2329146416E-06

7 2

0.1318005544E+03 0.6451083706E+02 0.4990924358E+03 0.1265169333E+04 0.1763983617E+04 0.1533557821E+04 0.1131338332E+04 0.8994216559E+03 0.5128843090E+03 0.2334016375E+03 0.1006272268E+03 0.4061013934E+02 0.1511524307E+02 0.4995136921E+01 0.1307121940E+01 0.1268355498E+00 -0.1620795598E+00 -0.1758951958E+00 -0.1279748517E+00 -0.8139886000E-01 -0.4874940361E-01 -0.284403293E-01 -0.1643525462E-01 -0.9524641305E-02 -0.5566101249E-02 -0.3290906217E-02 -0.1969462969E-02 -0.1192245271E-02 -0.7290682534E-03 -0.4499828699E-03 -0.2788498674E-03 -0.1743424490E-03 -0.1092528317E-03 -0.6932470428E-04 -0.4437830278E-04 0.2876860497E-04 -0.1855214787E-04 -0.1205696347E-04 -0.8178957489E-05 -0.5814035648E-05 -0.4307149017E-05 -0.2639430040E-05 -0.1591056502E-05 -0.8622601893E-06 -0.4137185362E-06 -0.1690795673E-06 -0.4243695482E-07 0.5206162894E-07 0.1830308276E-06 0.3501345488E-06 0.5357990162E-06 0.7224504533E-06 0.8925150837E-06 0.1028419131E-05 0.112588819E-05 0.1127450371E-05 0.1061354679E-05 0.9263513078E-05 0.7404144903E-06 0.5215184593E-06 0.2876374480E-06 0.5674568932E-07 -0.1253825838E-06 -0.3241731385E-06 -0.4425156544E-06 -0.5115554629E-06 -0.5389018080E-06 -0.5321639337E-06 -0.4989510839E-06 -0.4468725028E-06 -0.3835374343E-06 -0.3165551225E-06 -0.2522112666E-06 -0.1914973861E-06 -0.1340814559E-06 -0.7963145065E-07 -0.2781534517E-07 0.2169888577E-07 0.6924326743E-07 0.1151498250E-06 0.159705838E-06 0.2033775690E-06 0.2463628058E-06 0.2890383196E-06 0.3317313615E-06 0.3747882786E-06 0.4185267744E-06 0.4632836481E-06 0.5093090247E-06 0.5571806297E-06 0.6069847883E-06 0.6591354256E-06 0.7138360071E-06 0.7707757591E-06 0.8295153481E-06 0.8896154406E-06 0.9506367031E-06 0.1012139802E-05 0.1073685404E-05 0.1134834175E-05 0.1195146783E-05 0.1254183892E-05 0.1311506712E-05 0.1366674285E-05 0.1419248901E-05 0.1468790685E-05 0.1514860305E-05 0.1557018425E-05 0.1594825714E-05 0.1627842837E-05 0.1655630460E-05 0.1677749252E-05 0.1693871275E-05 0.1704114188E-05 0.1708770488E-05 0.170788910E-05 0.1701858831E-05 0.1690875867E-05 0.1675159074E-05 0.1654937508E-05 0.1630440227E-05 0.1601896285E-05 0.1569534739E-05 0.1533584646E-05 0.1494275062E-05 0.1451835042E-05 0.1406493643E-05 0.1358479922E-05 0.1308022934E-05 0.125531736E-05 0.1200695384E-05 0.1144282934E-05 0.1083634342E-05 0.1027105966E-05 0.9667995597E-06 0.9056532811E-06 0.8438961858E-06 0.7817573302E-06 0.7194657704E-06 0.6572505626E-06 0.5953407632E-06 0.5339654283E-06 0.4733536142E-06 0.4137343771E-06 0.3553367733E-06 0.2983898588E-06 0.2431226901E-06 0.1897642333E-06 0.1385438147E-06 0.8969022043E-07 0.4343259679E-07 0.1441232961E-21

7 4

0.4295340280E+03 0.4944346416E+03 0.1758530915E+03 -0.2577022508E+03 -0.3352538563E+03 0.3091725809E+03 0.1698023854E+04 0.1903808959E+04 0.937223490E+03 0.3800839150E+03 0.1485332484E+03 0.5388419068E+02 0.1716166214E+02 0.4045328204E+02 -0.1452943935E-02 -0.8891207913E-02 -0.8183087391E+00 -0.5669268461E+00 -0.3517974934E-02 -0.2075883059E+00 -0.1202478722E+00 -0.6986878207E-01 -0.4138721863E-01 -0.2527637481E-01 -0.1600849447E-01 -0.1051647457E-01 -0.1237485620E-02 -0.4966754645E-02 -0.3515146672E-02 -0.2518464697E-02 -0.1815724052E-02 -0.1316623521E-02 -0.9539865965E-03 -0.6915239325E-03 -0.5022193325E-03 -0.3655205316E-03 -0.2645400477E-03 -0.1909994499E-03 -0.1387472541E-03 -0.1016319765E-03 -0.7425585298E-04 -0.5423599939E-04 -0.3994325136E-04 -0.2974844455E-04 -0.2221313187E-04 -0.1666173507E-04 -0.1260939315E-04 -0.9571245104E-05 -0.7133627975E-05 -0.5167661424E-05 -0.3615669145E-05 -0.2419970043E-05 -0.1522884224E-05 0.8667317919E-06 -0.3938328494E-06 -0.4650750100E-07 0.2245810461E-06 0.4353971704E-06 0.5935621472E-06 0.7066972516E-06 0.7824327586E-06 0.8283629345E-06 0.8521360814E-06 0.8613644475E-06 0.8620699246E-06 0.8538768272E-06 0.8348190776E-06 0.80284845978E-06 0.7561553102E-06 0.6926171369E-06 0.6103050001E-06 0.5072438222E-06 0.3823191427E-06 0.2378589720E-06 0.7705193762E-07 -0.9691332636E-07 -0.8808482111E-06 -0.4715640700E-06 -0.6658722816E-06 -0.8605842184E-06 -0.1052511252E-05 -0.1238464756E-05 -0.1415256102E-05 -0.1579666662E-05 -0.1782597808E-05 -0.1858770913E-05 -0.1967027349E-05 -0.2050178489E-05 -0.2105035704E-05 -0.2128410367E-05 -0.2117113851E-05 -0.2067957526E-05 -0.1978856790E-05 -0.1825143125E-05 -0.1691252041E-05 -0.1499619044E-05 -0.1280679643E-05 -0.1037869344E-05 -0.7746236547E-06 -0.4943780838E-06 -0.2005681383E-06 0.1033706743E-06 0.4140028463E-06 0.7278928701E-06 0.1041605238E-05 0.1351704443E-05 0.1654754977E-05 0.1947321333E-05 0.2225968002E-05 0.2487259478E-05 0.2727760253E-05 0.2944034819E-05 0.3133393139E-05 0.3296127058E-05 0.3433273888E-05 0.3545870945E-05 0.3634955544E-05 0.37701564998E-05 0.3746736622E-05 0.3771507730E-05 0.3776915637E-05 0.3763997656E-05 0.3733791103E-05 0.3687332929E-05 0.3625661537E-05 0.3549813152E-05 0.3460825452E-05 0.3359735715E-05 0.3247581363E-05 0.3125399603E-05 0.2994227786E-05 0.2855103225E-05 0.2709063235E-05 0.2597145130E-05 0.2400386225E-05 0.2249823834E-05 0.2076495271E-05 0.1911437851E-05 0.1744658888E-05 0.1580285697E-05 0.1416265591E-05 0.1254665885E-05 0.1056733895E-05 0.9428769325E-06 0.7947623137E-06 0.6532173526E-06 0.5192793634E-06 0.3939856606E-06 0.2783735585E-06 0.1734803714E-06 0.8034341383E-07 0.9122198806E-21

7 6

-0.8308373195E+03 -0.7417652950E+03 0.4450643267E+03 0.1176838255E+04 0.1262304864E+04 0.7717706193E+03 -0.4488563377E+03 -0.1150917413E+04 -0.6421351826E+03 -0.2667506463E+03 -0.1080778814E+03 -0.4055486729E+02 -0.1373703168E+02 -0.3754759540E+01 -0.4828204056E+00 0.3513425924E+00 0.4179593116E+00 0.3053386480E+00 0.1906432733E+00 0.1106578345E+00 0.6202575790E-01 0.3437320050E-01 0.1916003079E-01 0.1088483089E-01 0.6372202181E-02 0.3862880093E-02 0.2428469977E-02 0.1574771835E-02 0.1056817547E-02 0.7201136965E-03 0.5003329196E-03 0.3521834237E-03 0.2485136988E-03 0.1764485636E-03 0.925292333E-03 0.9123209745E-04 0.6568667070E-04 0.4732561873E-04 0.3455112913E-04 0.2576687240E-04 0.1955341397E-04 0.1520141913E-04 0.121788912E-04 0.9953861172E-05 0.8081059168E-05 0.6462205580E-05 0.5085754525E-05 0.3940160118E-05 0.3011112740E-05 0.2273247828E-05 0.1698437083E-05 0.1258552204E-05 0.9254648929E-06 0.6071508501E-06 0.4671697761E-06 0.2857053715E-06 0.1038000871E-06 -0.8030062566E-07 -0.2630765651E-06 -0.4410075297E-06 -0.6105733176E-06 -0.7682537274E-06 -0.9105285573E-06 -0.1033877606E-05 -0.1135958673E-05 -0.1219141564E-05 -0.1286974087E-05 -0.1343004050E-05 -0.1390779261E-05 -0.1433847526E-05 -0.1475756653E-05 -0.1520054451E-05 -0.1569533425E-05 -0.1623964880E-05 -0.1682364818E-05 -0.1743749241E-05 -0.1807134153E-05 -0.1871535557E-05 -0.1935969454E-05 -0.1999451848E-05 -0.2060998722E-05 -0.2119626138E-05 -0.2174350038E-05 -0.2224186447E-05 -0.2268151365E-05 -0.2305260797E-05 -0.2334530745E-05 -0.2354977211E-05 -0.2365616199E-05 -0.2365463710E-05 -0.2353535749E-05 -0.2328848316E-05 -0.2290762144E-05 -0.2240016872E-05 -0.2177696869E-05 -0.2104886503E-05 -0.2022670142E-05 -0.1932132155E-05 -0.1834356909E-05 -0.1730428774E-05 -0.1621432117E-05 -0.147885379E-05 -0.1392570711E-05 -0.1274874698E-05 -0.1156447637E-05 -0.103273896E-05 -0.9217378420E-06 -0.8076238446E-06 -0.6971162716E-06 -0.5912994913E-06 -0.4912578720E-06 -0.3980757819E-06 -0.3126072119E-06 -0.2347846432E-06 -0.1643011797E-06 0.1008859252E-06 -0.44421398354E-07 0.6003541384E-08 0.5006454576E-07 0.8826625274E-07 0.1209085775E-06 0.1462873971E-06 0.1707012809E-06 0.1884481248E-06 0.2018258252E-06 0.2111322780E-06 0.2166653796E-06 0.2187230260E-06 0.2176031135E-06 0.2136035380E-06 0.2070221960E-06 0.1981569833E-06 0.1873057963E-06 0.1747665311E-06 0.1608370839E-06 0.1458153507E-06 0.1299992278E-06 0.1136866113E-06 0.9717539730E-07 0.8076348207E-07 0.6474876171E-07 0.4942913238E-07 0.3510249024E-07 0.2206673144E-07 0.1061975213E-07 0.1059448480E-08 -0.6316283363E-08 -0.1120954724E-07 -0.1332244700E-07 -0.1325708648E-07 -0.1825569536E-08 -0.2708033982E-21

8 0

0.4131868326E+03 0.4081918697E+02 -0.6553626692E+03 -0.1315915415E+04 -0.1450965950E+04 -0.1035697951E+04 -0.1521576879E+03 0.8041260001E+03 0.1228375486E+04 0.1214488722E+04 0.8438878704E+03 0.3794677404E+03 0.153678289E+03 0.5895656915E+02 0.2137547450E+02 0.7173065038E+01 0.2082488880E+01 0.3875020724E+00 -0.1041404387E+00 -0.1985204806E+00 -0.1779790074E+00 -0.1348348967E+00 -0.9568161679E-01 -0.6584715852E-01 -0.4457277181E-01 -0.2986508937E-01 -0.1987258153E-01 -0.1315571163E-01 -0.8681875243E-02 -0.5718875520E-02 -0.3768354012E-02 -0.248889705E-02 -0.1646749282E-02 -0.1100764855E-02 -0.7406042612E-03 -0.5022965948E-03 -0.3397094348E-03 -0.2316930415E-03 -0.1633433455E-03 -0.1197562775E-03 -0.8822783327E-04 -0.6485426918E-04 -0.4793190670E-04 -0.3575706732E-04 -0.2680857600E-04 -0.2029527153E-04 -0.1560849619E-04 -0.1213959225E-04 -0.9370454571E-05 -0.7145188316E-05 -0.5398451239E-05 -0.4064901094E-05 -0.3079195633E-05 -0.2375992607E-05 -0.1889949770E-05 -0.1555724873E-05 -0.1316291353E-05 -0.1147885379E-05 -0.1035058805E-05 -0.9623634846E-06 -0.9143512711E-06 -0.87554704180E-06 -0.830583788E-06 -0.7639318069E-06 -0.6641373632E-06 -0.5355861384E-06 -0.366308305E-06 -0.2526241375E-06 -0.6091875739E-07 0.9913261174E-07 0.2461772719E-06 0.3718625250E-06 0.4696152447E-06 0.5399805905E-06 0.5852832938E-06 0.68078480857E-06 0.609996976E-06 0.5940628605E-06 0.5623623057E-06 0.5172227645E-06 0.4609689681E-06 0.3959256478E-06 0.3244175346E-06 0.2487693600E-06 0.1713058550E-06 0.9435175101E-07 0.2023177915E-07 -0.4872932933E-07 -0.1102068432E-06 -0.1618760312E-06 -0.2014121622E-06 -0.2264905048E-06 -0.2354511259E-06 -0.2290052841E-06 -0.2087903359E-06 -0.1759744380E-06 -0.1322495469E-06 -0.7898241925E-0

0.1788673050E-06 -0.3495240145E-06 -0.5015196747E-06 -0.6075752088E-06 -0.6663511013E-06 -0.6829927268E-06 -0.6626454604E-06 -0.6104546768E-06 -0.5315657508E-06 -0.4311240574E-06 -0.3142749713E-06 -0.1854769136E-06 -0.4644049028E-07 0.1018106463E-06 0.2582528440E-06 0.4218624504E-06 0.5916158135E-06 0.7664892808E-06 0.9454592002E-06 0.1127367463E-05 0.210518136E-05 0.1493080829E-05 0.1673225152E-05 0.1849120715E-05 0.2018937129E-05 0.2180844003E-05 0.2333010947E-05 0.2473607572E-05 0.2600803488E-05 0.2712768305E-05 0.2807671633E-05 0.2883683082E-05 0.2938972262E-05 0.2971708784E-05 0.2980062257E-05 0.2962202291E-05 0.2916298497E-05 0.2840520485E-05 0.2733037865E-05 0.2592821972E-05 0.2422051042E-05 0.2223705036E-05 0.2000763917E-05 0.1756207645E-05 0.1493016181E-05 0.1214169487E-05 0.9226475243E-06 0.6214302539E-06 0.3134976373E-06 0.1829635613E-08 -0.3105937897E-06 -0.6207926774E-06 -0.9257870661E-06 -0.1222596995E-05 -0.1508242501E-05 -0.1779743625E-05 -0.2034120405E-06 -0.2268392880E-05 -0.2479581087E-05 -0.2665364628E-05 -0.2826041350E-05 -0.296264861E-05 -0.3076103969E-05 -0.3167404683E-05 -0.3237528212E-05 -0.3287451964E-05 -0.3318153348E-05 -0.3336060977E-05 -0.3325798646E-05 -0.3304697376E-05 -0.3268283373E-05 -0.3217534044E-05 -0.3153462799E-05 -0.3076939044E-05 -0.2989048191E-05 -0.2890731646E-05 -0.2782966818E-05 -0.2666731116E-05 -0.2543001948E-05 -0.2412756724E-05 -0.2276972851E-05 -0.2136627738E-05 -0.1992698794E-05 -0.1846163427E-05 -0.1697999045E-05 -0.1549183058E-05 -0.1400692874E-05 -0.1253505901E-05 -0.1108599549E-05 -0.9669512243E-06 -0.8295383371E-06 -0.6973382955E-06 -0.5713285080E-06 -0.4524863833E-06 -0.3417893299E-06 -0.2402147563E-06 -0.1487400711E-06 -0.6834268278E-07 0.1813225392E-20

8 4

0.5851383668E+03 0.3862207176E+03 -0.5333440337E+02 -0.4557578609E+03 -0.7008840812E+03 -0.6235530500E+03 0.5549036674E+03 0.8640384472E+03 0.3805098234E+03 0.1462919976E+03 0.5413296728E+02 0.1887715291E+02 0.5759919785E+01 0.1294071648E+01 -0.4491735789E-01 -0.3130002986E+02 -0.2765005042E+00 -0.1874459620E+00 -0.1142389703E+00 -0.6617595579E-01 -0.3753791879E-01 -0.218566271E-01 -0.1227415174E-01 -0.7275926583E-02 -0.4487548294E-02 -0.2880288076E-02 -0.1921139363E-02 -0.1318003675E-02 -0.9272737398E-03 -0.6674597064E-03 -0.4800788389E-03 -0.3486290627E-03 -0.2531166430E-03 -0.1839303032E-03 -0.1350983902E-03 -0.1001420344E-03 -0.7337890877E-04 -0.5282007290E-04 -0.3739993310E-04 -0.2605280971E-04 -0.1780636071E-04 -0.1205970285E-04 -0.8305290552E-05 -0.6035492231E-05 -0.4476870437E-05 -0.4192764214E-05 -0.3980706733E-05 -0.3838231162E-05 -0.3523000411E-05 -0.3033196348E-05 -0.176314719E-05 -0.1099460369E-05 -0.4944791411E-06 -0.6482642137E-08 0.3062175192E-06 0.4014764822E-06 0.3018163755E-06 0.4592607565E-07 -0.3275055412E-06 -0.7797895987E-06 -0.1272237221E-05 -0.1766159531E-05 -0.2222867652E-05 -0.2610826990E-05 -0.2927120073E-05 -0.31745383708E-05 -0.3361654705E-05 -0.3488369872E-05 -0.3560366018E-05 -0.35818779952E-05 -0.3557148483E-05 -0.3490311943E-05 -0.3385124761E-05 -0.3245244886E-05 -0.3074330273E-05 -0.2876038871E-05 -0.2654028633E-05 -0.2411957511E-05 -0.2153483456E-05 -0.1882644240E-05 -0.1601958354E-05 -0.1316223210E-05 -0.1028716941E-05 -0.7430974969E-06 -0.4630228303E-06 -0.1921508926E-06 0.6586036432E-07 0.3073529889E-06 0.5286690295E-06 0.7261505343E-06 0.8961395516E-06 0.1035909068E-05 0.1229707491E-05 0.1287591752E-05 0.1322036282E-05 0.1334968758E-05 0.1328316856E-05 0.1304008254E-05 0.1263970629E-05 0.1210131658E-05 0.1144419018E-05 0.1068760385E-05 0.9850834374E-06 0.8953158513E-06 0.8013853039E-06 0.7052194723E-06 0.6087460334E-06 0.5138926642E-06 0.4225870418E-06 0.3367568430E-06 0.2579621960E-06 0.1862930335E-06 0.1217173919E-06 0.6322069650E-07 0.1126228951E-07 -0.3468109816E-07 -0.7488708280E-07 -0.1096332807E-06 -0.1391973081E-06 -0.1638567813E-06 -0.1838893166E-06 -0.1995725302E-06 -0.2111840384E-06 -0.2190014576E-06 -0.2233024039E-06 -0.2243644937E-06 -0.2224653432E-06 -0.2168282678E-06 -0.2108937864E-06 -0.2017766128E-06 -0.1908086639E-06 -0.1782675562E-06 -0.1644309058E-06 -0.1495763291E-06 -0.1339814423E-06 -0.1179238618E-06 -0.1016812037E-06 -0.8553108437E-07 -0.6975112008E-07 -0.5461892710E-07 -0.4041212171E-07 -0.2740832017E-07 -0.1588513878E-07 -0.6120193793E-08 0.1608898502E-08 0.7024521833E-08 0.9849059924E-08 0.9804896499E-08 0.6614415283E-08 -0.1336707002E-19

8 6

-0.4197409344E+03 -0.6949244327E+03 -0.7718641232E+03 0.4429848215E+03 0.1722735252E+04 0.1493567391E+04 -0.3804776046E+03 -0.162884648E+04 -0.9519729026E+03 -0.3937143782E+03 -0.1596271025E+03 -0.6031395873E+02 -0.2083974944E+02 -0.6023123916E+01 -0.1051694974E+01 0.2989470638E+01 0.4836797678E+00 0.3730008659E+00 0.2369973077E+00 0.1380422329E+00 0.7697925466E-01 0.4212365487E-01 0.2299772157E-01 0.1270916082E-01 0.7182255678E-02 0.1474082468E-02 0.2510445033E-02 0.1562885109E-02 0.1003342062E-02 0.6581684515E-03 0.4425677166E-03 0.3004999917E-03 0.2062700571E-03 0.1445710036E-03 0.1024970428E-03 0.7339847139E-04 0.3827582483E-04 0.2825558824E-04 0.2097288984E-04 0.1500601738E-04 0.1011596847E-04 0.6359418142E-05 0.3793041461E-05 0.2404697594E-05 0.1906982189E-05 0.1943675010E-05 0.2158555820E-05 0.226213423E-05 0.2224472770E-05 0.2086967848E-05 0.1887332646E-05 0.1662001152E-05 0.1456207356E-05 0.1301985245E-05 0.1240168807E-05 0.1291640845E-05 0.1444420268E-05 0.1644936764E-05 0.1858690449E-05 0.2046413833E-05 0.2168839424E-05 0.2186699730E-05 0.2060727263E-05 0.1764432016E-05 0.1322433935E-05 0.7721304485E-06 0.1509189885E-06 -0.503803149E-06 -0.1154638131E-05 -0.1764188929E-05 -0.2295057979E-05 -0.2717426010E-05 -0.3031786390E-05 -0.3246210647E-05 -0.3368770309E-05 -0.3407536903E-05 -0.3370581959E-05 -0.3265977004E-05 -0.3101793566E-05 -0.2886103172E-05 -0.2626977352E-05 -0.2332487633E-05 -0.2010705542E-05 -0.1669702609E-05 -0.1317550360E-05 -0.9623203248E-06 -0.6120840301E-06 -0.2749130044E-06 0.1411224373E-07 0.3279471283E-06 0.5774931792E-06 0.7835063877E-06 0.9470079173E-06 0.1070837470E-05 0.1157834749E-05 0.1210839545E-05 0.1323691290E-05 0.1226229957E-05 0.1194295158E-05 0.1139726595E-05 0.1065363970E-05 0.9740469857E-06 0.8686153433E-06 0.7519087452E-06 0.6267668935E-06 0.4960294905E-06 0.3625364481E-06 0.2291268386E-06 0.9864099390E-07 -0.2608159375E-06 -0.1422012233E-06 -0.2474229899E-06 -0.3416311962E-06 -0.4252549408E-06 -0.498207325E-06 -0.5624654434E-06 -0.6169104027E-06 -0.6624872988E-06 -0.699625322E-06 -0.7287533027E-06 -0.7503006102E-06 -0.746665455E-06 -0.772369325E-06 -0.7737489523E-06 -0.7692642055E-06 -0.7593441947E-06 -0.7444180195E-06 -0.7249147799E-06 -0.7012635756E-06 -0.6738935064E-06 -0.6432336720E-06 -0.6097131724E-06 -0.5736711073E-06 -0.5358065764E-06 -0.4962786797E-06 -0.4556065168E-06 -0.412918766E-06 -0.3725457919E-06 -0.3310154294E-06 -0.2900572000E-06 -0.2501002034E-06 -0.2115735395E-06 -0.1749063080E-06 -0.1405276088E-06 -0.1088665417E-06 -0.805226832E-07 -0.5541370261E-07 -0.3448013033E-07 -0.1798058927E-07 -0.6344179229E-08 0.2960550065E-19

8 8

0.2338160634E+03 -0.1103392083E+03 -0.3784119471E+03 -0.1739068107E+03 0.1671764356E+03 -0.1326324508E+03 -0.8093782123E+01 0.2183807232E+03 0.1332697177E+03 0.5483014141E+02 0.224895289E+02 0.8575282381E+01 0.3078815060E+01 0.9417027498E+00 0.2077523584E+00 -0.5175778978E-02 -0.4626120395E-01 -0.4012953659E-01 -0.2656092236E-01 -0.1576775348E-01 -0.8874994451E-02 -0.4871887217E-02 -0.2651321026E-02 -0.1454320212E-02 -0.8098688781E-03 -0.4634028139E-03 -0.5712541890E-03 -0.1635824249E-03 -0.1004922910E-03 -0.6467772615E-04 -0.4051252491E-04 -0.2683544135E-04 -0.1912406479E-04 -0.1397975676E-04 -0.9398692011E-05 -0.2605514214E-05 -0.3185380827E-05 -0.1937035539E-05 -0.1462618598E-05 -0.1364270249E-05 -0.1312302119E-05 -0.1249711343E-05 -0.1187666437E-05 -0.113735916E-05 -0.1104719738E-05 -0.1075143641E-05 -0.1028764805E-05 -0.94574404125E-06 -0.8119700885E-06 -0.6363232354E-06 -0.4334117002E-06 -0.1278473295E-06 -0.4241970159E-08 0.1927925311E-06 0.3586443276E-06 0.4787015724E-06 0.5422012169E-06 0.5537740424E-06 0.5219050755E-06 0.4550711719E-06 0.3617546348E-06 0.2504364051E-06 0.1295974241E-06 0.7718633017E-08 -0.1081265782E-06 -0.2164950243E-06 -0.3173510713E-06 -0.4106590850E-06 -0.4963834315E-06 -0.5744884767E-06 -0.6449385865E-06 -0.7076981269E-06 -0.7627867419E-06 -0.8104451872E-06 -0.8509694966E-06 -0.8846557040E-06 -0.9117998433E-06 -0.9326979481E-06 -0.9476460524E-06 -0.9569401899E-06 -0.9608763945E-06 -0.9597506999E-06 -0.9538591400E-06 -0.9434977486E-06 -0.9289625595E-06 -0.9105496065E-06 -0.8885549235E-06 -0.8632745443E-06 -0.8350045025E-06 -0.8040048322E-06 -0.7706795671E-06 -0.7352167410E-06 -0.6979372931E-06 -0.6590817844E-06 -0.6183796813E-06 -0.5775604501E-06 -0.5353535572E-06 -0.4924846489E-06 -0.4491946517E-06 -0.4057051751E-06 -0.3622386958E-06 -0.3190354899E-06 -0.2763214204E-06 -0.2343259538E-06 -0.1932785564E-06 -0.1534089476E-06 -0.1149458348E-06 -0.7811944335E-07 0.4315898656E-07 -0.1029393083E-07 0.2024625748E-07 0.4823211199E-07 0.7348980948E-07 0.9606809932E-07 0.1160713740E-06 0.1336040260E-06 0.14874479E-06 0.1616750322E-06 0.1724221714E-06 0.1811162579E-06 0.1878616843E-06 0.1927628431E-06 0.1959241268E-06 0.1974499279E-06 0.1974446390E-06 0.1960126524E-06 0.1932583607E-06 0.1892861565E-06 0.1842004323E-06 0.1781055804E-06 0.1711059935E-06 0.1633060641E-06 0.1548101846E-06 0.1457227476E-06 0.1361481456E-06 0.1261907710E-06 0.1159550164E-06 0.1055452744E-06 0.9506539727E-07 0.8462139768E-07 0.7431604810E-07 0.6425480899E-07 0.5454048899E-07 0.4527906447E-07 0.3657439999E-07 0.2853088804E-07 0.2125292114E-07 0.1484489178E-07 0.9411192487E-08 0.5056215754E-08 0.1884354089E-08 -0.6131098823E-20

9 0

-0.9157516118E+02 -0.1777017339E+03 0.2789315355E+02 0.3455699786E+03 0.3193783858E+03 0.4924686808E+03 0.6486989596E+03 0.1059867311E+04 0.8565397051E+03 0.9292374452E+02 -0.2447268517E+03 -0.1321983197E+03 -0.5668749019E+02 -0.2331239291E+02 -0.9450187350E+01 -0.338193922E+01 -0.1974051938E+01 -0.6501035049E+00 -0.2658336839E+00 -0.1032920964E+00 -0.3441321284E-01 -0.6125789023E-02 0.4371642439E-02 0.7205672140E-02 0.6962531409E-02 0.5694126090E-02 0.4286825740E-02 0.3066876170E-02 0.2123038957E-02 0.1436950673E-02 0.9551121589E-03 0.6277141045E-03 0.4090396703E-03 0.2666514742E-03 0.1739256092E-03 -0.139337089E-03 0.7392362084E-04 0.4815250751E-04 0.3262980067E-04 0.2363616964E-04 0.1695786739E-04 0.1236714434E-04 0.9142131485E-05 0.6831959826E-05 0.5051624223E-05 0.3679574997E-05 0.2660126330E-05 0.1937592405E-05 0.1459237885E-05 0.1184129342E-05 0.1074283825E-05 0.1091718386E-05 0.1198450074E-05 0.1356495940E-05 0.1527873035E-05 0.1674598409E-05 0.1765849593E-05 0.1799446049E-05 0.1780367716E-05 0.1713594530E-05 0.1604106455E-05 0.1456883409E-05 0.1276905341E-05 0.1069152194E-05 0.8389410824E-06 0.5929378144E-06 0.3381453725E-06 0.8156673866E-07 -0.1697951058E-06 -0.1697951058E-06 -0.1388931764E-06 -0.6288564934E-06 -0.8225500740E-06 -0.9845676366E-06 -0.1115669702E-05 -0.1218169492E-05 -0.1294380227E-05 -0.1346615130E-05 -0.1377187421E-05 -0.1388410323E-05 -0.1382597055E-05 -0.1362060841E-05 -0.1329114901E-05 -0.1286072456E-05 -0.1235246729E-05 -0.1178950940E-05 -0.1119498311E-05 -0.1059202064E-05 -0.1000375419E-05 -0.9453115985E-06 -0.8963838237E-06 -0.8558453160E-06 -0.8260292968E-06 -0.8086909942E-06 -0.8033536624E-06 -0.8089825625E-06 -0.8245429554E-06 -0.8490001021E-06 -0.8813192635E-06 -0.9204657005E-06 -0.9654046743E-06 -0.1015101446E-06 -0.1068521276E-05 -0.1124629425E-05 -0.1182391155E-05 -0.1240771726E-05 -0.1298736400E-05 -0.1355250437E-05 -0.1409279099E-05 -0.1459787645E-05 -0.1505741338E-05 -0.1546105439E-05 -0.1579845207E-05 -0.1606146230E-05 -0.1625075398E-05 -0.1636919924E-05 -0.1641967026E-05 -0.1640503917E-05 -0.1632817813E-05 -0.1619195930E-05 -0.1599925481E-05 -0.1575293683E-05 -0.1545587750E-05 -0.1511094898E-05 -0.1472102342E-05 -0.1428897297E-05 -0.1381766978E-05 -0.1330998601E-05 -0.1276879380E-05 -0.1219696530E-05 -0.1159737268E-05 -0.1097288807E-05 -0.1032638364E-05 -0.9660731524E-06 0.8978803886E-06 -0.8283472874E-06 -0.7577610640E-06 -0.6864089334E-06 -0.6145781110E-06 -0.5425558118E-06 -0.4706292509E-06 -0.3990856436E-06 -0.3282122050E-06 -0.2582961503E-06 -0.1896246946E-06 -0.1224850530E-06 -0.5716444084E-07 0.6049926876E-08 0.6687083494E-07 0.1250110682E-07 0.1801834115E-06 0.2321006497E-06 0.2804755675E-06

9 2

0.1671170412E+02 0.1046061827E+03 -0.5909462918E+02 -0.2213069748E+03 -0.2942947008E+03 0.6510306225E+02 0.3302275797E+03 0.3949534037E+03 0.2294582548E+03 0.1048850444E+03 0.4475612510E+02 0.1836221326E+02 0.1716055581E+01 0.2641632656E+01 0.8967816483E+00 0.2678333403E+00 0.5968861783E-01 0.429726708E-03 -0.1142907688E-01 -0.1017

0.2467975285E-06 -0.2286799877E-06 -0.21004481556E-06 -0.1910948915E-06 -0.1720130545E-06 -0.1529955039E-06 -0.1342350990E-06 -0.1159246990E-06 -0.9825716313E-07 -0.8142535060E-07 -0.6562212067E-07 -0.5104033258E-07 -0.3787248557E-07 -0.2631251888E-07 -0.1655221173E-07 -0.8784783382E-08 -0.323093058E-08 -0.9768063620E-22

9 4  
0.2465461403E+03 0.9027392732E+03 0.1341887067E+04 0.6573266418E+03 -0.4490678192E+03 -0.9045456401E+03 -0.1922935387E+03 -0.9394211867E+02 -0.1426871103E+03 -0.6925107835E+02 -0.3260965806E+02 -0.1385974322E+02 -0.5520567429E+01 -0.1963352449E+01 -0.6181345803E+00 -0.1497047027E+00 -0.9616258491E-02 0.2067874874E-01 0.1984132235E-01 0.1329782534E-01 0.7779862489E-02 0.4231505492E-02 0.2190844363E-02 0.1083622018E-02 0.5096144075E-03 0.2150121533E-03 0.7304877419E-04 0.2831019095E-05 -0.2412203068E-04 -0.3343173694E-04 -0.3369596389E-04 -0.3208756817E-04 -0.2681434649E-04 -0.2026994906E-04 -0.1572594652E-04 -0.1264636388E-04 -0.9820463099E-05 -0.7145980235E-05 -0.4797770108E-05 -0.2950687530E-05 -0.1727897875E-05 -0.1045808752E-05 -0.7691383286E-06 -0.7626047714E-06 -0.9032588538E-06 -0.1117481771E-05 -0.1343987322E-05 -0.1521489308E-05 -0.1600699065E-05 -0.1580318074E-05 -0.1471045351E-05 -0.1283579913E-05 -0.1028620777E-05 -0.7168669579E-06 -0.3590174739E-06 0.3422865892E-07 0.4510468621E-06 0.8751103100E-06 0.1288966615E-05 0.1675163390E-05 0.2016248247E-05 0.2294768799E-05 0.2493272658E-05 0.2594307436E-05 0.2586300059E-05 0.2481194697E-05 0.2296814834E-05 0.2050983953E-05 0.1761525538E-05 0.1446263071E-05 0.1123200037E-05 0.8096199177E-06 0.5207928981E-06 0.2588959644E-06 0.2319280365E-07 -0.1870528971E-06 -0.3725774506E-06 -0.5341171699E-06 -0.6724083678E-06 -0.7881873573E-06 -0.8821904512E-06 -0.9551539625E-06 -0.1007814204E-05 -0.1040907489E-05 -0.1055170130E-05 -0.1051338439E-05 -0.1030148731E-05 -0.9923373174E-06 -0.9386405115E-06 0.2972141478E+03 -0.4006911515E+03 -0.1617116916E+03 -0.6132041847E+02 -0.2155449674E+02 -0.6527590223E+01 -0.1386737129E+01 0.9163736580E-01 0.3603809615E+00 0.3019787822E+00 0.1969362312E+00 0.1156436349E+00 0.6441076113E-01 0.3496523095E-01 0.1882686766E-01 0.1018726406E-01 0.5606476014E-02 0.3157874454E-02 0.1830128393E-02 0.1097680041E-02 0.6815803288E-03 0.4314672050E-03 0.2836999011E-03 0.1840800759E-03 0.1219938340E-03 0.8395109068E-04 0.555025049E-04 0.3454916679E-04 0.2154723755E-04 0.1480819042E-04 0.1210823547E-04 0.1122358276E-04 0.1032398549E-04 0.9153369408E-05 0.7849203407E-05 0.6548956371E-05 0.5372794619E-05 0.4371674197E-05 0.3579248593E-05 0.3029171255E-05 0.2738817006E-05 0.2660445881E-05 0.2730039240E-05 0.2683578445E-05 0.3057044855E-05 0.3186419831E-05 0.3207684732E-05 0.3056820802E-05 0.2690940352E-05 0.2151677385E-05 0.2101796969E-05 0.8040640595E-06 0.1212436082E-06 0.4838994315E-06 -0.9486001067E-06 -0.1210093464E-05 -0.1224425494E-05 -0.1023101956E-05 -0.6563045555E-06 -0.1743229947E-06 0.3725800225E-06 0.9341417924E-06 0.1460099611E-05 0.1900190776E-06 0.2214238742E-05 0.2402411466E-05 0.2474963148E-05 0.2442147921E-05 0.2314219936E-05 0.2101433341E-05 0.1814042286E-05 0.1462300922E-05 0.1056463397E-05 0.6067838618E-06 0.1235164660E-06 -0.3830846408E-06 -0.9027653089E-06 -0.1425271388E-05 -0.1940348730E-05 -0.2437743183E-05 -0.2907200599E-06 0.3338466828E-05 -0.3712128771E-05 -0.4045409123E-05 -0.4303007152E-05 -0.4495978955E-05 -0.4628651944E-05 -0.4703411128E-05 -0.4708152145E-05 0.4642903995E-05 -0.4538994088E-05 -0.4400749836E-05 -0.4232498651E-05 -0.4038567944E-05 -0.3823285127E-05 -0.3590977611E-05 -0.3345972807E-05 -0.3092598127E-05 -0.2835180983E-05 -0.2578048785E-05 -0.2325528946E-05 -0.2081948876E-05 -0.1851635988E-05 -0.1638086491E-05 -0.1441471790E-05 -0.1261132087E-05 -0.1096407585E-05 0.9466384866E-06 -0.8211649499E-06 -0.6893273127E-06 -0.5804656426E-06 -0.4683201874E-06 -0.3990311498E-06 -0.3251387328E-06 -0.2615831389E-06 -0.2077045711E-06 0.1628432321E-06 -0.1263393246E-06 -0.9753305141E-07 -0.7576461533E-07 -0.6037421911E-07 -0.502706554E-07 -0.4608835737E-07 -0.4387329739E-07 -0.4939708837E-07 -0.5599933070E-07 -0.6502203427E-07 -0.8768481727E-07 -0.100059046E-06 -0.1121070595E-06 -0.1233284848E-06 -0.1330103833E-06 -0.1404929576E-06 -0.1451164016E-06 -0.1462209451E-06 -0.1431467638E-06 -0.1352340695E-06 -0.1218230650E-06 -0.1022539530E-06 -0.7586693631E-07 -0.4200221773E-07 -0.1988805233E-21

9 6  
0.4121649366E+03 0.2119423030E+02 -0.9369388215E+02 0.2021379018E+02 0.9983196424E+03 0.1713638850E+04 -0.8673694905E+02 -0.1753575224E+04 -0.9772141478E+03 -0.4006911515E+03 -0.1617116916E+03 -0.6132041847E+02 -0.2155449674E+02 -0.6527590223E+01 -0.1386737129E+01 0.9163736580E-01 0.3603809615E+00 0.3019787822E+00 0.1969362312E+00 0.1156436349E+00 0.6441076113E-01 0.3496523095E-01 0.1882686766E-01 0.1018726406E-01 0.5606476014E-02 0.3157874454E-02 0.1830128393E-02 0.1097680041E-02 0.6815803288E-03 0.4314672050E-03 0.2836999011E-03 0.1840800759E-03 0.1219938340E-03 0.8395109068E-04 0.555025049E-04 0.3454916679E-04 0.2154723755E-04 0.1480819042E-04 0.1210823547E-04 0.1122358276E-04 0.1032398549E-04 0.9153369408E-05 0.7849203407E-05 0.6548956371E-05 0.5372794619E-05 0.4371674197E-05 0.3579248593E-05 0.3029171255E-05 0.2738817006E-05 0.2660445881E-05 0.2730039240E-05 0.2683578445E-05 0.3057044855E-05 0.3186419831E-05 0.3207684732E-05 0.3056820802E-05 0.2690940352E-05 0.2151677385E-05 0.2101796969E-05 0.8040640595E-06 0.1212436082E-06 0.4838994315E-06 -0.9486001067E-06 -0.1210093464E-05 -0.1224425494E-05 -0.1023101956E-05 -0.6563045555E-06 -0.1743229947E-06 0.3725800225E-06 0.9341417924E-06 0.1460099611E-05 0.1900190776E-06 0.2214238742E-05 0.2402411466E-05 0.2474963148E-05 0.2442147921E-05 0.2314219936E-05 0.2101433341E-05 0.1814042286E-05 0.1462300922E-05 0.1056463397E-05 0.6067838618E-06 0.1235164660E-06 -0.3830846408E-06 -0.9027653089E-06 -0.1425271388E-05 -0.1940348730E-05 -0.2437743183E-05 -0.2907200599E-06 0.3338466828E-05 -0.3712128771E-05 -0.4045409123E-05 -0.4303007152E-05 -0.4495978955E-05 -0.4628651944E-05 -0.4703411128E-05 -0.4708152145E-05 0.4642903995E-05 -0.4538994088E-05 -0.4400749836E-05 -0.4232498651E-05 -0.4038567944E-05 -0.3823285127E-05 -0.3590977611E-05 -0.3345972807E-05 -0.3092598127E-05 -0.2835180983E-05 -0.2578048785E-05 -0.2325528946E-05 -0.2081948876E-05 -0.1851635988E-05 -0.1638086491E-05 -0.1441471790E-05 -0.1261132087E-05 -0.1096407585E-05 0.9466384866E-06 -0.8211649499E-06 -0.6893273127E-06 -0.5804656426E-06 -0.4683201874E-06 -0.3990311498E-06 -0.3251387328E-06 -0.2615831389E-06 -0.2077045711E-06 0.1628432321E-06 -0.1263393246E-06 -0.9753305141E-07 -0.7576461533E-07 -0.6037421911E-07 -0.502706554E-07 -0.4608835737E-07 -0.4387329739E-07 -0.4939708837E-07 -0.5599933070E-07 -0.6502203427E-07 -0.8768481727E-07 -0.100059046E-06 -0.1121070595E-06 -0.1233284848E-06 -0.1330103833E-06 -0.1404929576E-06 -0.1451164016E-06 -0.1462209451E-06 -0.1431467638E-06 -0.1352340695E-06 -0.1218230650E-06 -0.1022539530E-06 -0.7586693631E-07 -0.4200221773E-07 -0.1988805233E-21

9 8  
-0.1825465178E+03 0.7198696458E+03 0.7361904225E+03 0.7901596321E+02 -0.2794977381E+03 -0.9821617668E+03 -0.3468356202E+03 0.5352286043E+03 0.3546103124E+03 0.1463066357E+03 0.6064382288E+02 0.2348904147E+02 0.8618158109E+02 0.2717999616E+01 0.7144767305E+00 0.8269143107E-01 -0.6643763696E-01 -0.3737347212E-01 -0.5151787017E-01 -0.3083836877E-01 -0.1713551040E-01 -0.9159524247E-02 -0.4802909019E-02 -0.2509031787E-02 -0.132555591E-02 -0.7125933959E-03 -0.3934878454E-03 -0.2177624635E-03 -0.1276218226E-03 -0.7749003716E-04 -0.4683160948E-04 -0.3191123391E-04 -0.2180716161E-04 -0.1391694309E-04 -0.8558542786E-05 -0.514766645E-05 -0.2999688734E-05 -0.1719807674E-05 -0.9855707430E-06 -0.474537801E-06 0.5871485372E-07 0.5516781455E-06 0.864829196E-06 0.8586420005E-06 0.4528630041E-06 -0.1957352866E-06 -0.8711192969E-06 -0.1357255452E-05 -0.1488485807E-05 -0.1300654938E-05 -0.8799830473E-06 -0.3126903411E-06 0.3150029763E-06 0.9168767005E-06 0.1406710627E-05 0.1698284550E-05 0.1728581642E-05 0.1527398577E-05 0.1147735405E-05 0.6425921744E-06 0.6496893621E-07 -0.5321342600E-06 0.1095717364E-05 -0.1572780327E-05 -0.1921672031E-05 -0.2146137088E-05 -0.2261269043E-05 -0.2282161441E-05 -0.2223907828E-05 -0.2101601747E-05 -0.193036743E-05 -0.1722506362E-05 -0.1499271225E-05 -0.1257460260E-05 -0.1002669470E-05 -0.7377948612E-06 -0.4657324370E-06 -0.1893782021E-06 0.8837183916E-07 0.3646216825E-06 0.6364753234E-06 0.9010367576E-06 0.1155409981E-05 0.1396698988E-05 0.1622007776E-05 0.1828440339E-05 0.2013100674E-05 0.2173092775E-05 0.2305520639E-05 0.2407488261E-05 0.2476099637E-05 0.2508458763E-05 0.2502647522E-05 0.2460659356E-05 0.2385465592E-05 0.2280037561E-05 0.2147346592E-05 0.1950936401E-05 0.1812061154E-05 0.1615409344E-05 0.1403379912E-05 0.1178944188E-05 0.9450734994E-06 0.7047391765E-06 0.4609125482E-06 0.2165649437E-06 -0.2533230798E-07 0.2618078776E-06 -0.4898904361E-06 -0.7066086544E-06 -0.9089912032E-06 -0.1094066753E-05 -0.1259485937E-05 -0.1405387230E-05 -0.1532531071E-05 -0.1641677895E-05 -0.1733588141E-05 -0.180922245E-05 -0.1868740646E-05 -0.1913503780E-05 -0.1944072085E-05 -0.1961205997E-05 -0.1965665955E-05 -0.1958212395E-05 -0.1939605755E-05 0.1910606472E-05 -0.187197483E-05 -0.1824471726E-05 -0.1768857138E-05 -0.1705891657E-05 -0.1636335718E-05 -0.1560949761E-05 -0.148094221E-05 -0.1395729537E-05 0.1307416146E-05 -0.1216314484E-05 -0.1123184990E-05 -0.1028788100E-05 -0.9328485254E-06 -0.8392338836E-06 -0.7455974311E-06 -0.6537353324E-06 -0.5644080245E-06 -0.4783759450E-06 -0.3963995310E-06 -0.3192392198E-06 -0.2476554487E-06 -0.1242592760E-06 -0.7396774897E-06 -0.3229451121E-07 0.7853296128E-21

10 0  
0.4145997941E+02 0.4895512840E+03 0.6245979169E+03 0.6956217060E+02 -0.5675733777E+03 -0.1015174134E+04 -0.1054594277E+04 -0.5086664672E+03 0.5398865722E+02 0.4798692896E+03 0.4494861237E+03 0.2110000880E+03 0.8512308144E+02 0.3272375860E+02 0.1207303784E+02 0.4264750639E+01 0.1421217754E+01 0.4277834131E+00 0.9996670932E-01 0.2147091914E-02 -0.2055094949E-01 -0.2104743373E-01 -0.1643182370E-01 -0.1170012964E-01 -0.8005694756E-02 -0.5361920989E-02 -0.354321371E-02 -0.2324183025E-02 -0.1513248386E-02 -0.9784673876E-03 -0.632373104E-03 -0.4082463013E-03 -0.2611236366E-03 -0.1676956803E-03 -0.1085286203E-03 -0.7117806025E-04 -0.4632584869E-04 -0.30156497701E-04 -0.2023075466E-04 -0.1410951507E-04 -0.9726039488E-05 -0.6503204454E-05 -0.4236290316E-05 -0.2720577424E-05 -0.1762957784E-05 -0.1216914026E-05 -0.9474504365E-06 -0.8196433011E-06 -0.7210911507E-06 -0.6295536930E-06 -0.5453307566E-06 -0.4687226906E-06 -0.4000281331E-06 0.3395482516E-06 -0.2875825275E-06 -0.2444308636E-06 -0.2105938028E-06 -0.1873744486E-06 -0.1762765446E-06 -0.1788038345E-06 -0.1964600619E-06 -0.2307489704E-06 -0.2831743037E-06 -0.3552398053E-06 -0.4472208674E-06 -0.5544794756E-06 -0.6711492641E-06 -0.7913638671E-06 -0.9092569187E-06 -0.1018962053E-06 -0.1114612904E-05 -0.1190343107E-05 -0.1241589643E-05 -0.1269002892E-05 -0.1274536582E-05 -0.1260144400E-05 -0.1227780194E-05 -0.1179397571E-05 -0.1116950300E-05 -0.1042397107E-05 -0.9576767200E-06 -0.8647578674E-06 -0.7655892764E-06 -0.6621246748E-06 -0.5563177901E-06 -0.4501223500E-06 -0.3454920821E-06 -0.2443807141E-06 -0.1487419736E-06 0.6052958828E-07 0.1830271424E-07 0.8580120632E-07 0.1405174282E-06 0.1830239920E-06 0.2143987777E-06 0.2357196652E-06 0.2480645435E-06 0.2252112656E-06 0.2501377384E-06 0.2420218329E-06 0.2292414292E-06 0.2128744071E-06 0.1939986467E-06 0.1736920279E-06 0.1530324306E-06 0.1330977350E-06 0.1149658209E-06 0.9971456832E-07 0.8842175227E-07 0.8216556760E-07 0.8202357941E-07 0.8907377264E-07 0.1041626927E-06 0.1272115469E-06 0.1579102078E-06 0.1959485482E-06 0.240164408E-06 0.2928037583E-06 0.3510003733E-06 0.4152961586E-06 0.4853809689E-06 0.5609447309E-06 0.6416727632E-06 0.727684566E-06 0.8174081838E-06 0.9117863174E-06 0.1010092730E-05 0.112017295E-05 0.1217249884E-05 0.1325480370E-05 0.1436398627E-05 0.1549694526E-05 0.1665057940E-05 0.1782178434E-05 0.1900746806E-05 0.2020452002E-05 0.2140984205E-05 0.2262033287E-05 0.2383289120E-05 0.2504441577E-05 0.2625180532E-05 0.2745195855E-05 0.2864177422E-05 0.298185103E-05 0.3097798772E-05 0.3211818301E-05 0.3323563564E-05 0.3432724432E-05 0.3538990779E-05 0.3642052477E-05 0.3741599399E-05 0.3837321418E-05

10 2  
0.8872181299E+02 -0.3720291618E+03 -0.4302917517E+03 -0.2135194746E+03 -0.1343427080E+03 0.4150380743E+02 0.1545219037E+03 0.3929264228E+02 0.1120385746E+02 0.1236303651E+02 0.5918339271E+01 0.2877662327E+01 0.1373094438E+01 0.6591041893E+00 0.3159087704E+00

0.1895568812E-07 -0.1317673812E-06 -0.2444538355E-06 -0.3226510110E-06 -0.3699062439E-06 -0.3897668706E-06 -0.3857802272E-06 -0.3614936501E-06 -0.3204544756E-06 -0.2662100398E-06 -0.2023076790E-06 -0.1322947295E-06 -0.5971852766E-07 0.1187359835E-07 0.7893248835E-07 0.1379162299E-06 0.1852720789E-06 0.2174544990E-06 0.2309161539E-06 0.2221097074E-06 0.1874878233E-06 0.1245159563E-06 0.3471072610E-06 -0.7939845667E-07 -0.2152821813E-06 -0.3704110371E-06 -0.5422556135E-06 -0.7282864996E-06 -0.132789559E-05 -0.1346202910E-05 -0.1563684929E-05 -0.1782706203E-05 -0.2000737324E-05 -0.2215248880E-05 -0.2423711459E-05 -0.2623595653E-05 -0.2812372049E-05 -0.2987511238E-05 -0.3146483808E-05 -0.3286760349E-05 -0.3406365678E-05 -0.3505541521E-05 -0.3585083831E-05 -0.3645788565E-05 -0.3688451674E-05 -0.3713869113E-05 -0.3722836837E-05 -0.3716150798E-05 -0.3694606952E-05 -0.3659001252E-05 -0.3610129652E-05 -0.3548788106E-05 -0.3475772568E-05 -0.3391878993E-05 -0.3297903333E-05 -0.3194641544E-05 -0.3082889578E-05 -0.2963443391E-05 -0.2837098935E-05 -0.2704652166E-05 -0.2566899037E-05 -0.242465501E-05 -0.227865714E-05 -0.2129761029E-05 -0.1978742000E-05 -0.1826396381E-05 -0.1673520126E-05 -0.1520909188E-05 -0.1369359523E-05 -0.1219667084E-05 -0.1072672825E-05 -0.9290376996E-06 -0.7896926624E-06 -0.6553886670E-06 -0.5269216677E-06 -0.40050876183E-06 -0.2906824728E-06 -0.1845021853E-06 -0.873427086E-07 -0.1299266036E-19 10 6 0.3049447604E+03 -0.1552788699E+03 -0.3443709006E+03 -0.2219274659E+03 0.5553258701E+03 0.1871031517E+04 0.4385221026E+03 -0.1234625250E+04 -0.6685853595E+03 -0.2710197530E+03 -0.1084211353E+03 -0.4103738278E+02 -0.1457687857E+02 -0.4579879825E+01 -0.1089885023E+01 -0.5473803768E-01 0.1669209149E+00 0.1574862545E+00 0.1059574918E+00 0.6271661822E-01 0.3482872644E-01 0.1871658746E-01 0.9925462068E-02 0.5244986167E-02 0.2816357725E-02 0.1533693284E-02 0.8574635650E-03 0.5018163270E-03 0.3020953451E-03 0.1775009708E-03 0.1173464680E-03 0.7672654849E-04 0.4729356449E-04 0.2873447827E-04 0.1892096068E-04 0.1409216603E-04 0.1074446190E-04 0.8035585417E-05 0.5788616076E-05 0.3826633380E-05 0.2025559090E-05 0.4726840049E-06 0.6918588186E-06 0.1327936323E-05 0.1358296184E-05 -0.9572089962E-06 -0.3618260897E-06 0.1907012079E-06 0.5154589909E-06 0.6364830440E-06 0.6300465745E-06 0.5724227897E-06 0.539848969E-06 0.6087061033E-06 0.8551596162E-06 0.1355518643E-05 0.2152830168E-05 0.3157236286E-05 0.4245652869E-05 0.5294995788E-05 0.6182180915E-05 0.6788124121E-05 0.66977741279E-05 0.6639948261E-05 0.5689971086E-05 0.4216276368E-05 0.2349640869E-05 0.2208413521E-06 -0.2039345421E-05 -0.4300142689E-05 -0.6430773689E-05 -0.8300461658E-05 -0.9804692656E-05 -0.1094400402E-04 -0.1174519592E-04 -0.1223506850E-04 -0.1244042193E-04 -0.1238805638E-04 -0.1210477199E-04 -0.1161736894E-04 -0.1095264738E-04 -0.1013740747E-04 -0.9198449374E-05 -0.8162573251E-05 -0.7056579263E-05 -0.5907267569E-05 -0.4741438331E-05 -0.3585891708E-05 -0.2467427862E-05 -0.1412846952E-05 -0.4489491400E-06 0.3974654145E-06 0.1105552426E-05 0.1678291113E-05 0.2124616567E-05 0.2269065438E-05 0.2673768152E-05 0.2794446469E-05 0.2824487926E-05 0.2772773618E-05 0.2648256636E-05 0.2459872074E-05 0.2216555025E-05 0.1927240583E-05 0.1600863389E-05 0.1263759898E-05 0.8726638245E-06 0.4887107388E-06 0.1034357252E-06 -0.2742261232E-06 -0.6353397132E-06 -0.9709699516E-06 -0.1273886043E-06 -0.1543674381E-05 -0.1781625658E-05 -0.1289030565E-05 -0.2167179794E-05 -0.2317364037E-05 -0.2440873985E-05 -0.2532993030E-05 -0.2613033764E-05 -0.2664264978E-05 -0.2693984665E-05 -0.2703483515E-05 -0.0964052220E-06 -0.2666981473E-05 -0.2623561964E-05 -0.2565084386E-05 -0.2492839043E-05 -0.2408117788E-05 -0.2312210151E-05 -0.2206407211E-05 -0.2091999660E-05 -0.1970278190E-05 -0.1842533492E-05 -0.1710056257E-05 -0.1574137179E-05 -0.1436066947E-05 -0.1297136254E-05 -0.1158635792E-05 -0.1021856252E-05 -0.8880883261E-06 -0.7586227057E-06 -0.6347500826E-06 -0.5177611483E-06 -0.4089465947E-06 -0.3095971134E-06 -0.2210033961E-06 -0.1444561344E-06 -0.8124602005E-07 -0.3266374469E-07 0.3757068727E-19 10 8 -0.3784488638E+03 -0.2570937227E+03 0.7817478511E+03 0.9154896225E+03 -0.9353998998E+02 -0.1700860597E+04 -0.7763656613E+03 0.8717789723E+03 0.5913507579E+03 0.2427791238E+03 0.1000786638E+03 0.3888327646E+02 0.1454628812E+02 0.4765221096E+01 0.1301596928E+01 0.2128615923E+00 -0.6399417267E-01 -0.9568699151E-01 -0.7064183800E-01 -0.4313482065E-01 -0.2413851024E-01 -0.1289648707E-01 -0.6714231212E-02 -0.3492860381E-02 -0.1808073219E-02 -0.9590659982E-03 -0.5192698512E-03 -0.2825429435E-03 -0.1582569694E-03 -0.9599214349E-04 -0.5381356871E-04 -0.3180945519E-04 -0.2214146419E-04 -0.1694627763E-04 -0.1118961959E-04 -0.1571855540E-05 -0.2348387861E-05 -0.8860250708E-06 -0.6362772266E-06 -0.9039543844E-06 -0.111947718E-05 -0.1215712869E-05 -0.1251136599E-05 -0.1284225667E-05 -0.348228386E-06 -0.1375479287E-05 -0.1273084453E-05 -0.9481499682E-06 -0.3416224993E-06 0.4701889498E-06 0.1377134792E-05 0.2269065438E-05 0.3035831302E-05 0.3567282796E-05 0.3753270332E-05 0.3483644323E-05 0.2691060975E-05 0.1479399671E-05 -0.4654413994E-08 -0.1614416103E-05 -0.3203200220E-05 -0.4624321588E-05 -0.5731095032E-06 -0.6376835375E-05 -0.6457267203E-05 -0.6037754156E-05 -0.5226069636E-05 -0.4129987045E-05 -0.2857279784E-05 -0.1515721255E-05 -0.2130848607E-06 0.9428559973E-06 0.1685263318E-05 0.2551040707E-05 0.3018027168E-05 0.3284061707E-05 0.336983329E-05 0.3284631041E-05 0.3054843846E-05 0.2695460752E-05 0.2224320762E-05 0.1659262884E-05 0.1018126121E-05 0.3187494796E-06 -0.4210280349E-06 -0.118367417E-05 -0.1950429662E-05 -0.2704375763E-05 -0.3427366716E-05 -0.101563515E-05 -0.4709127155E-05 -0.5232218630E-05 -0.5657025072E-05 -0.5985838164E-05 -0.6224975725E-05 -0.6380755575E-05 -0.6459495535E-05 -0.6467513423E-05 -0.641172059E-05 -0.6296654264E-05 -0.6130412857E-05 -0.5918720657E-05 -0.5667895486E-05 -0.5384255161E-05 -0.5074117504E-05 -0.4743800334E-05 -0.4399621470E-05 -0.40417898734E-05 -0.3694949943E-05 -0.1334709291E-05 -0.3010645480E-05 -0.2691925446E-05 -0.2396047386E-05 -0.2123312855E-05 -0.1872820158E-05 -0.1643667598E-05 -0.1434953480E-05 -0.1245776108E-05 -0.1075233785E-05 -0.9224248158E-06 -0.7864475045E-06 -0.6664001551E-06 -0.5613810716E-06 -0.470488580E-06 -0.3928209183E-06 -0.3274764567E-06 -0.235534772E-06 -0.2301502838E-06 -0.1963651806E-06 -0.171296471E-06 -0.1540424608E-06 -0.1437014523E-06 -0.1393717502E-06 -0.1401516585E-06 -0.1451394813E-06 -0.1534335225E-06 -0.1641320863E-06 -0.1763334767E-06 -0.1891359977E-06 -0.2016379534E-06 -0.2129376478E-06 -0.2221333850E-06 -0.2283234691E-06 -0.2306062039E-06 -0.2280798938E-06 -0.2198428425E-06 -0.2049933543E-06 -0.1826297331E-06 -0.1518502831E-06 -0.1117533082E-06 -0.6143711247E-07 -0.4396028746E-19 10 10 0.7088542693E+02 -0.1053686888E+03 0.1952943015E+03 0.1954985790E+03 -0.1153530320E+03 0.9833890441E+02 0.6553585052E+02 -0.7027057664E+02 -0.5037823903E+02 -0.2102018407E+02 -0.9047159494E+01 -0.3606390355E+01 -0.1392169193E+01 -0.4759003228E+00 -0.1387252872E+00 -0.3139382079E-01 -0.1248239452E-02 0.4701506784E-02 0.42441782879E-02 0.2767693708E-02 0.1596388716E-02 0.8617416068E-03 0.4586663482E-03 0.2351793190E-03 0.1242234424E-03 0.6589295857E-04 0.3314280645E-04 0.1840448712E-04 0.1011063780E-04 0.7241792612E-05 0.4494048922E-05 0.2730251883E-05 0.1305827668E-05 -0.8680069085E-06 -0.9685149957E-06 -0.1405962140E-05 -0.1237856098E-05 -0.6421883764E-06 0.1377602923E-06 0.8587091749E-06 0.1322832713E-05 0.1514126048E-05 0.1462039498E-05 0.1196023378E-05 0.7591227794E-06 0.2487618890E-06 -0.2240403327E-06 -0.5482649253E-06 -0.6402969091E-06 -0.5261372282E-06 -0.2591908075E-06 0.1071374280E-06 0.5194425534E-06 0.924312683673E-06 0.1268363774E-05 0.1498170019E-05 0.1575140780E-05 0.1519970757E-05 0.1367909977E-05 0.1154586466E-05 0.9153762510E-06 0.6857183575E-06 0.5010518122E-06 0.3968156414E-06 0.3989934831E-06 0.4957474213E-06 0.6657841514E-06 0.8878103691E-06 0.1140532770E-05 0.1402658049E-05 0.1652892902E-05 0.1869944025E-05 0.2036693174E-05 0.2212788587E-05 0.2247648963E-05 0.2234060525E-05 0.2184780329E-05 0.2103655430E-05 0.1994172884E-05 0.1860359745E-05 0.1705883070E-05 0.1534499913E-05 0.1349967330E-05 0.1156042377E-05 0.9564821076E-06 0.7550435782E-06 0.554838441E-06 0.3615599605E-06 0.1770289827E-06 0.5647463606E-08 -0.1488260340E-06 -0.2834553573E-06 -0.3985799232E-06 -0.4953590465E-06 -0.5749520417E-06 -0.6588182234E-06 0.6871269061E-06 -0.7222074045E-06 -0.7446490332E-06 -0.7557011067E-06 -0.7565229396E-06 -0.7482738466E-06 -0.7321131421E-06 -0.7092001408E-06 -0.6806941573E-06 -0.6477545061E-06 -0.6115405019E-06 -0.5732114591E-06 -0.5339266925E-06 -0.4948455166E-06 -0.4571272460E-06 -0.4217222122E-06 -0.3887448151E-06 -0.3581004713E-06 -0.3296945977E-06 -0.3034326110E-06 -0.2792199279E-06 -0.2569619652E-06 -0.2365641397E-06 -0.2179318680E-06 -0.2009705670E-06 -0.1855856535E-06 -0.1718625441E-06 -0.1591666556E-06 -0.1479434048E-06 -0.1379182085E-06 -0.1289964833E-06 -0.1210836461E-06 -0.1140851136E-06 -0.1079063026E-06 -0.1024526297E-06 -0.976295183E-07 -0.9334236568E-07 -0.894660800E-07 -0.8599765555E-07 -0.8275092509E-07 -0.7966183337E-07 -0.7663579715E-07 -0.7357823318E-07 -0.7039455822E-07 -0.6699018901E-07 -0.6327054233E-07 -0.5914103492E-07 -0.5450708353E-07 -0.4927410492E-07 -0.4334751586E-07 -0.3663273308E-07 -0.2903517335E-07 -0.2046025343E-07 -0.1081339006E-07 0.625582871E-20 11 0 0.3061356059E+02 -0.2313227990E+03 -0.4618207071E+03 -0.2906104333E+03 -0.4132162470E+02 -0.4077202559E+02 0.8775315275E+02 0.54688663799E+03 0.7359725439E+03 0.2060664134E+03 -0.1142407787E+03 -0.7369292956E+02 -0.3084908571E+02 -0.1218855361E+02 -0.4683892927E+01 -0.1783479348E+01 -0.6822441732E+00 -0.26064696460E+00 -0.1044525831E+00 -0.4155563230E-01 -0.1621430185E-01 -0.5815267466E-02 -0.1571658152E-02 -0.6154429474E-04 0.5898634031E-06 0.6603020294E-03 0.5692208571E-03 0.4383710687E-03 0.3165687785E-03 0.2182240080E-03 0.1465181236E-03 0.9729872930E-04 0.6331004484E-04 0.4059047425E-04 0.2618131054E-04 0.1173073437E-04 0.7007154398E-05 0.4363543026E-05 0.2631837244E-05 0.1363209131E-05 0.4657711209E-06 0.6312926537E-07 -0.2261445067E-06 -0.5041726130E-07 0.3389490951E-06 0.7923610073E-06 0.1160224920E-05 0.132523453E-05 0.1301543919E-05 0.1134149809E-05 0.8692046098E-06 0.5252718108E-06 0.2301149006E-06 -0.5230263224E-07 -0.2488172991E-06 -0.3255564219E-06 -0.2966105649E-06 -0.1880611028E-06 -0.2598941042E-07 0.1635231374E-06 0.3543951659E-06 0.5205453002E-06 0.6358921657E-06 0.6809666223E-06 0.6627484694E-06 0.5948297413E-06 0.4908024723E-06 0.3642586966E-06 0.2287904484E-06 0.9798976206E-07 -0.1455132823E-06 -0.9788339595E-07 -0.1516274456E-06 -0.1780470894E-06 -0.1794059396E-06 -0.1579676084E-06 -0.1159957082E-06 -0.5575385101E-07 0.2049435079E-07 0.1104852850E-06 0.2119533393E-06 0.3226409016E-06 0.4402783596E-06 0.5626041010E-06 0.6873545136E-06 0.8122659852E-06 0.9350749035E-06 0.1053517656E-06 0.1165330631E-05 0.1268250216E-05 0.1360012799E-05 0.1438833609E-05 0.1505003242E-05 0.1559191137E-05 0.1602146730E-05 0.1634599460E-05 0.1657278764E-05 0.1670914081E-05 0.1676234847E-05 0.1673970502E-05 0.1664850481E-05 0.1649604224E-05 0.1628961169E-05 0.1603650752E-05 0.1574402411E-05 0.1541945585E-05 0.1507009711E-05 0.1470324288E-05 0.1432618572E-05 0.1394621812E-05 0.1357064494E-05 0.1320546074E-05 0.1285151990E-05 0.1250834836E-05 0.1217561608E-05 0.1185277699E-05 0.1153942905E-05 0.1123513421E-05 0.1093945440E-05 0.1065195158E-05 0.1037218770E-05 0.1009972470E-05 0.9834124528E-06 0.9574949132E-06 0.9321760458E-06 0.9074120455E-06 0.8831591069E-06 0.8593734248E-06 0.8360111937E-06 0.8130286086E-06 0.7903818640E-06 0.7680271546E-06 0.7459206753E-06 0.7240186206E-06 0.7022771854E-06 0.6806525642E-06 0.6591099519E-06 0.6375785431E-06 0.6160415325E-06 0.5944461149E-06 0.5727484849E-06 0.5509048373E-06 0.5288713667E-06 0.5066040806E-06 0.4840597357E-06 0.4611939647E-06 0.4379631495E-06 0.4143234850E-06 0.3902311658E-06 0.3652683867E-06 0.3405133423E-06 11 2 -0.6461953863E+02 0.1110404261E+02 -0.1503309981E+03 -0.2743739282E+03 -0.4051688304E+02 0.2193913199E+03 0.2250682362E+03 -0.1110357472E+03 -0.963591677E+02 -0.3233814047E+02 -0.1277416782E+02 -0.4674642779E+01 -0.1568345371E-01 -0.4313126082E+00 -0.6439564091E-01 0.2990960325E-01 0.3898345026E-01 0.2828998897E-01 0.1718173595E-01 0.9566138034E-02 0.5071892427E-02 0.2615043126E-02 0.1327741082E-02 0.6736017960E-03 0.3430588824E-03 0.1772312896E-03 0.282928824E-04 0.5095585974E-04 0.2652779337E-04 0.1707140915E-04 0.1100653505E-04 0.4820530948E-05 0.2060567398E-05 0.1532122969E-05 0.1014766643E-05 0.3924513892E-06 -0.7621223371E-08 -0.1896392174E-08 -0.2406380131E-06 -0.2476533038E-08 -0.

11 4

-0.2269499043E+03 -0.4741262190E+03 -0.3682279990E+03 0.2904193256E+03 0.8414087634E+03 0.4315198636E+03 0.7889008538E+02 -0.4399016647E+03 -0.3354228432E+03 -0.1425939542E+03 -0.5975960704E+02 -0.2383089869E+02 -0.90767230224E+01 -0.3132679854E+01 -0.9619790930E+00 -0.2286612559E+00 -0.1467948844E-01 0.3050985961E-01 0.2903909922E-01 0.1933619929E-01 0.1129309863E-01 0.617510778E-02 0.3263336852E-02 0.1698463622E-02 0.8798574273E-03 0.4647818620E-03 0.2487488084E-03 0.1348274118E-03 0.7246992295E-04 0.4438327061E-04 0.2267371103E-04 0.1477086359E-04 0.1063416137E-04 0.6985925436E-05 0.4328869856E-05 0.29361177955E-05 0.2868257176E-05 0.3563942156E-05 0.4306674329E-05 0.4379895131E-05 0.3290110798E-05 0.1436086782E-05 -0.5603466651E-06 -0.2077359288E-05 -0.2651165484E-05 -0.2450158249E-05 -0.1800775228E-05 -0.1029454067E-05 -0.4041054010E-06 0.1416817374E-07 0.3319910718E-06 0.4921877077E-06 0.5467824956E-06 0.5204998500E-06 0.4380641852E-06 0.3241999156E-06 0.2011981137E-06 0.8161648487E-07 -0.2442060765E-07 -0.1067888004E-06 -0.1553637300E-06 -0.1600210331E-06 -0.1106363463E-06 0.2914693906E-08 0.1867645689E-06 0.4310782330E-06 0.7220287583E-06 0.1045789217E-05 0.1388532682E-05 0.1736432225E-05 0.2075660918E-05 0.2392391835E-05 0.2675364623E-05 0.2923585239E-05 0.3138626216E-05 0.3322060088E-05 0.3475459388E-05 0.3600396648E-05 0.3698444401E-05 0.3771175182E-05 0.3820161522E-05 0.3846975956E-05 0.3853191015E-05 0.3840379234E-05 0.3810113146E-05 0.3763965282E-05 0.3703508178E-05 0.3630314365E-05 0.3545956377E-05 0.3452006747E-05 0.3350038008E-05 0.3241622693E-05 0.3128169794E-05 0.3010434135E-05 0.2889006999E-05 0.2764479669E-05 0.2637443427E-05 0.2508489557E-05 0.2378209341E-05 0.2247194062E-05 0.2116035004E-05 0.1985323448E-05 0.1855650678E-05 0.1727607977E-05 0.1601786627E-05 0.1478777911E-05 0.1359173112E-05 0.1243563513E-05 0.1132540397E-05 0.1026695047E-05 0.9266187449E-06 0.8329027742E-06 0.7459964230E-06 0.6657810003E-06 0.5919958207E-06 0.5243801987E-06 0.4626734487E-06 0.4066148852E-06 0.359438226E-06 0.3103995755E-06 0.2697214582E-06 0.2336487854E-06 0.2019208713E-06 0.1742770306E-06 0.1504565776E-06 0.1301988269E-06 0.1132430929E-06 0.9932869014E-07 0.8819493299E-07 0.7958113597E-07 0.7322661354E-07 0.6887068017E-07 0.6625265034E-07 0.6511183852E-07 0.6518755917E-07 0.6621912676E-07 0.6794585577E-07 0.7010706066E-07 0.7244205590E-07 0.7469015597E-07 0.7659067533E-07 0.7788292845E-07 0.7830622981E-07 0.7759989387E-07 0.7550323510E-07 0.7175556797E-07 0.6609620696E-07 0.5826446652E-07 0.4799966114E-07 0.3504110528E-07 0.1912811341E-07 0.6775792454E-21

11 6

0.3671956790E+03 0.4839732988E+03 -0.6755411995E+03 -0.1196182006E+04 -0.2948718636E+03 0.1323646309E+04 0.4822759521E+03 -0.5594097009E+03 -0.2319636506E+03 -0.9282954879E+02 -0.3531255377E+02 -0.1284931794E+02 -0.4479618511E+01 -0.1402452713E+01 -0.3269167598E+00 -0.7501710255E-02 0.5668582052E-01 0.5095760210E-01 0.3363800603E-01 0.1966251459E-01 0.1080466714E-01 0.5744788087E-02 0.3005139418E-02 0.1568325010E-02 0.8310021887E-03 0.44666091050E-03 0.2375504849E-03 0.1409653983E-03 0.8322868378E-04 0.4896073042E-04 0.3526122427E-04 0.9955258958E-05 0.2608122513E-05 0.6703159426E-05 0.5714312402E-05 0.1621349230E-05 -0.2482388130E-06 0.3181084430E-06 0.2254218391E-05 0.44893918423E-05 0.6146165090E-05 0.7020431571E-05 0.7101320201E-05 0.6373433319E-05 0.4009514904E-05 0.2982875511E-05 0.1049967342E-05 -0.5087574040E-06 -0.1309378333E-05 -0.1602578276E-05 -0.1296774368E-05 -0.5866217457E-06 0.4047395554E-06 0.1554347099E-05 0.2738972049E-05 0.3835563169E-05 0.4741423465E-05 0.5435450508E-05 0.5916940509E-05 0.6185189681E-05 0.6239494237E-05 0.6079150387E-05 0.5703454346E-05 0.5111702324E-05 0.4311699778E-05 0.3345289210E-05 0.2268222320E-05 0.114650846E-05 -0.4887348612E-07 -0.1177398947E-05 -0.2220573811E-05 0.3128046348E-05 -0.3860055850E-05 -0.4419205678E-05 -0.4818690213E-05 -0.5071703835E-05 -0.5191440924E-05 -0.519095860E-05 -0.5083863023E-05 -0.4882936794E-05 -0.4601511552E-05 -0.4252781678E-05 -0.3849941551E-05 -0.3406185552E-05 -0.2934708061E-05 -0.2448703458E-05 -0.1961366124E-05 -0.1485890437E-05 -0.1035470779E-05 0.623015295E-06 -0.2625770687E-06 0.3350822338E-07 0.2548568319E-06 0.4037587034E-06 0.4856006496E-06 0.5057694825E-06 0.4696520140E-06 0.3826250557E-06 0.2501054197E-06 0.7744991771E-07 -0.1299446384E-06 -0.3666914367E-06 -0.6274036655E-06 -0.9066945128E-06 -0.1199177167E-05 -0.1499464186E-05 -0.1802170648E-05 -0.201907851E-05 -0.2393289613E-05 -0.2670929123E-05 -0.2929439569E-05 -0.3163434138E-05 -0.3368610713E-05 -0.3545005951E-05 -0.3693741202E-05 -0.3815937818E-05 0.3912717148E-05 -0.3985200545E-05 -0.4034509359E-05 -0.4061764940E-05 -0.4068088639E-05 -0.4054601807E-05 -0.4022425796E-05 -0.3972681955E-05 -0.3906491636E-05 -0.382497189E-05 -0.3729256965E-05 -0.3620455316E-05 -0.3499692591E-05 -0.3368090141E-05 -0.3226769318E-05 -0.3076851472E-05 -0.2919457955E-05 -0.2755710116E-05 -0.258796306E-05 -0.2413636877E-05 -0.2237554179E-05 -0.2059602563E-05 -0.188090330E-05 -0.172577981E-05 -0.1525747716E-05 -0.1351533936E-05 -0.1181057992E-05 -0.1015441235E-05 -0.8558050155E-06 -0.7032706844E-06 -0.558959526E-06 -0.4239930909E-06 -0.2994925299E-06 -0.1865792606E-06 -0.8637463367E-07 -0.3348783690E-20

11 8

-0.2117010228E-03 -0.3460359374E+03 -0.2416654955E+03 0.3337649053E+03 0.4842169705E+03 -0.2004040046E+04 -0.1393755604E+04 0.9888176436E+03 0.7096781893E+03 0.2875498567E+03 0.1180911805E+03 0.4595889490E+02 0.1724146057E+02 0.5755856283E+01 0.3410665252E+00 -0.1905486880E-01 -0.7985187473E-01 -0.6485616812E-01 -0.4083736683E-01 -0.2310630222E-01 -0.1236596959E-01 -0.6433345846E-02 -0.3288773195E-02 -0.1688704687E-02 -0.8840007484E-03 -0.4696598706E-03 -0.2385276172E-03 -0.1290039511E-03 -0.7652646018E-04 -0.4311626899E-04 -0.2988262345E-04 -0.1834511916E-04 -0.8423539512E-05 -0.4880556188E-05 -0.3984378395E-05 -0.130033971E-05 0.2883312233E-05 0.7037561115E-05 0.9633413573E-05 0.9579778814E-05 0.7537199286E-05 0.4604125746E-05 0.1879008953E-05 0.2366402917E-06 -0.3802623312E-06 -0.1298963819E-06 0.6489246741E-06 0.1756513655E-06 0.3045276517E-05 0.4388001499E-05 0.5654768404E-05 0.6726490779E-05 0.7467831557E-06 0.7754287412E-05 0.7458646584E-05 0.6504005174E-05 0.5014690272E-05 0.3165338650E-05 0.113084351E-05 -0.9149367643E-06 -0.2796598288E-05 -0.4339737814E-05 -0.5369746934E-05 -0.5759366725E-05 -0.5570889198E-05 -0.4913991847E-05 -0.3898352167E-05 -0.2633647652E-05 -0.1229555796E-05 0.2042549066E-06 0.1558079961E-05 0.2742179076E-05 0.3746416765E-05 0.4580576745E-05 0.5254442733E-05 0.577798445E-05 0.6160427598E-05 0.6412113909E-05 0.6842641094E-05 0.6657192870E-05 0.6479352953E-05 0.6305105060E-05 0.6048832908E-05 0.5720320213E-05 0.5329350692E-05 0.4885708062E-05 0.4399176038E-05 0.3879538338E-05 0.3336578679E-05 0.2780080777E-05 0.2219828348E-05 0.1664194407E-05 0.1115909161E-05 0.5762921148E-06 0.4666277214E-07 -0.4176593621E-06 -0.9773547833E-06 -0.1469103878E-05 -0.1945587468E-05 -0.2405485723E-05 -0.2847479246E-05 -0.3270248533E-06 -0.3672474080E-05 -0.4052836382E-05 -0.4410015934E-05 -0.4742693232E-05 -0.5049548772E-05 -0.5329263048E-05 -0.5580516556E-05 -0.5801989791E-05 -0.5992363250E-05 -0.6150739964E-05 -0.6277913121E-05 -0.6375098441E-05 -0.6443511650E-05 -0.6484368468E-05 -0.6498884621E-05 -0.6488275830E-05 -0.6453757819E-05 -0.6396546311E-05 -0.6317857029E-05 -0.6218905696E-05 -0.6100908035E-05 -0.5965079769E-05 -0.5812636621E-05 -0.5644794314E-05 -0.5462768572E-05 -0.5267775117E-05 -0.5061029672E-05 -0.4843747961E-05 -0.4617145706E-05 -0.4382438631E-05 -0.4140842459E-05 0.3893572912E-05 -0.3641845715E-05 -0.3386876589E-05 -0.3129881257E-05 -0.2872075444E-05 -0.2614674872E-05 -0.2358895264E-05 -0.2105952343E-05 -0.1857061832E-05 -0.1613439455E-05 -0.1376309345E-05 -0.1146861992E-05 -0.926338526E-06 -0.7159473388E-06 -0.5168998736E-06 -0.3304164800E-06 -0.1577118211E-06 -0.4328137805E-21

11 10

0.1727837875E+03 0.2439718835E+03 -0.1024084641E+03 -0.5791418592E+03 -0.1773698713E+03 0.5454549373E+03 0.2913173305E+03 -0.1826197275E+03 -0.1439727364E+03 -0.604597569E+02 -0.2635806947E+02 -0.1065438968E+02 -0.4186754661E+01 -0.1449893025E+01 -0.4364376190E+01 -0.1098468970E+00 -0.1423539677E-01 0.7652023572E-02 0.8956822953E-02 0.6152733713E-02 0.3587149833E-02 0.1928062425E-02 0.9865220930E-03 0.5073203105E-03 0.2518783177E-03 0.1256544057E-03 0.6449606692E-04 0.3175713921E-04 0.1668086790E-04 0.1096153451E-04 0.6872694604E-05 0.6047138742E-05 0.4695282832E-05 0.2411633124E-05 0.1623221036E-06 0.1479505666E-06 -0.2166197090E-05 -0.2059056316E-05 -0.1446631754E-05 -0.6174709120E-06 0.1755282608E-06 0.8220660591E-06 0.1247492338E-06 0.1377156952E-06 0.1173280227E-05 0.7556437040E-06 0.2405820583E-06 -0.1950940316E-06 -0.4457327680E-06 -0.5189692016E-06 -0.4532799292E-06 -0.1287141547E-06 -0.5903665272E-07 0.1925761582E-06 0.14292022888E-06 0.6123711424E-06 0.7143689369E-06 0.7250331481E-06 0.7469640663E-06 0.7297619817E-06 0.7250271847E-06 0.7588599654E-06 0.8573606142E-06 0.1046629421E-05 0.1344767635E-05 0.1737880334E-05 0.2204037355E-05 0.2721453334E-05 0.3268125708E-05 0.3822196715E-05 0.4361727390E-05 0.486498770E-05 0.5313850196E-05 0.5706494226E-05 0.6044926724E-05 0.6331183549E-05 0.6567300567E-05 0.6755313637E-05 0.6897258624E-05 0.6995171389E-05 0.7051087795E-05 0.7067043703E-05 0.7045074977E-05 0.6987217478E-05 0.6895950770E-05 0.6771979613E-05 0.6618670972E-05 0.6437617007E-05 0.6230853582E-05 0.6000416558E-05 0.5748341799E-05 0.5476665166E-05 0.5187429016E-05 0.4882710682E-05 0.4564557994E-05 0.4235072779E-05 0.3896320865E-05 0.3550377080E-05 0.3199316253E-05 0.2845213212E-05 0.2490142784E-05 0.2136179798E-05 0.178539083E-05 0.1439875465E-05 0.1101683774E-05 0.7728988368E-06 0.4555954824E-06 0.1518485387E-06 -0.1362671363E-06 -0.4066768043E-06 -0.6573052473E-06 -0.8860785671E-06 -0.1091416406E-05 -0.1273721090E-05 -0.1433899013E-05 -0.157280573E-05 -0.1691410163E-05 -0.1790556181E-05 -0.1871156022E-05 -0.1934107080E-05 -0.1980306753E-05 -0.2010652436E-05 -0.2026041524E-05 -0.2027371414E-05 -0.2015539500E-05 0.1991443178E-05 -0.1955979845E-05 -0.1910046895E-05 -0.1854541725E-05 -0.1790361730E-05 -0.1718404306E-05 -0.1639566849E-05 -0.1524675793E-05 -0.1464841416E-05 -0.1370748232E-05 -0.1273364597E-05 -0.1173587907E-05 -0.1072315558E-05 -0.9704449443E-06 -0.8688734630E-06 -0.7684985092E-06 -0.6702174787E-06 -0.5749277671E-06 -0.4835267701E-06 -0.3969118834E-06 -0.3159805025E-06 -0.2416300233E-06 -0.1747578414E-06 -0.1162613524E-06 -0.6703795209E-07 -0.2798503606E-07 -0.1703810856E-20

12 0

-0.1738941715E+03 0.1259878225E+02 0.4129618641E+03 0.6697860675E+03 0.6727104815E+03 0.2737193112E+03 -0.4740128093E+03 -0.7398602320E+03 -0.4136834600E+03 0.7779751286E+02 0.1928890959E+03 0.1032135426E+03 0.4114012202E+02 0.1562794374E+02 0.5731180471E+01 0.2038059406E+01 0.7012751431E+00 0.2309810304E+00 0.7075000943E-01 0.1849187613E-01 0.2659735117E-02 -0.1413426891E-02 -0.1963410382E-02 -0.1626767993E-02 -0.1172356751E-02 -0.7978349070E-03 0.5319481365E-03 -0.3466524020E-03 -0.2239826025E-03 -0.1450330936E-03 -0.9079851219E-04 -0.5873047979E-04 -0.3710798137E-04 -0.2232454249E-04 -0.1356493595E-04 -0.8612057111E-05 -0.5294310138E-05 -0.3024011789E-05 -0.1609456969E-05 -0.8589405837E-06 -0.5835688771E-06 -0.6056934528E-06 -0.7504772544E-06 -0.8430832250E-06 -0.7520960730E-06 -0.5197875672E-06 -0.2318512413E-06 0.2601937093E-07 0.1858228759E-06 0.2503264405E-06 0.2399893719E-06 0.1752709737E-06 0.7663053543E-07 -0.3547256164E-07 -0.1405790917E-06 -0.2182297193E-06 -0.2528224567E-06 -0.2481845943E-06 -0.2130007415E-06 -0.1559555080E-06 -0.8573350344E-07 -0.1101933749E-07 0.5950238025E-07 0.1171470401E-06 0.1550989370E-06 0.1740179835E-06 0.1764329967E-06 0.1648727938E-06 0.1418661918E-06 0.1099420080E-06 0.7162905925E-07 0.2945616284E-07 -0.1435753090E-07 -0.5883153852E-07 -0.1032950433E-06 -0.1470772285E-06 -0.1895072773E-06 -0.2299143732E-06 -0.2676276993E-06 -0.3019764389E-06 -0.3322897753E-06 -0.3578968918E-06 -0.3781269716E-06 -0.3923091980E-06 -0.3997727544E-06 -0.3998468239E-06 -0.3918605898E-06 -0.3751432355E-06 -0.3490239441E-06 -0.3128318990E-06 -0.2658962835E-06 -0.2075462807E-06 -0.1374513446E-06 -0.5664201077E-07 0.3351091468E-07 0.1316366254E-06 0.2363643152E-06 0.3462321779E-06 0.4601424074E-06 0.5764511974E-06 0.6938787417E-06 0.8110542341E-06 0.9266

0.1110010455E-05 -0.1245415593E-05 -0.1355500409E-05 -0.1436878727E-05 -0.1490469507E-05 -0.1518267987E-05 -0.1522269407E-05 -0.1504469009E-05 -0.1466862031E-05 -0.1411443714E-05 -0.1340209298E-05 -0.1255154023E-05 -0.1158273128E-05 -0.1051561855E-05 -0.9370154426E-06 -0.8166291313E-06 -0.6923981610E-06 -0.5663177719E-06 -0.4403832040E-06 -0.3165896973E-06 -0.1969324918E-06 -0.8340682756E-07 -0.2199205326E-07 -0.1176647195E-06 -0.2035949381E-06 -0.2810622870E-06 -0.3477463418E-06 -0.4667266786E-06 -0.4574828730E-06 -0.5003945008E-06 -0.5358411379E-06 -0.5642023600E-06 -0.5858577430E-06 -0.6011868626E-06 -0.6106929947E-06 -0.6164486150E-06 -0.6130123994E-06 -0.6068322236E-06 -0.5962236635E-06 -0.5815662949E-06 -0.5632369935E-06 -0.5416234351E-06 -0.5170970957E-06 -0.4900402508E-06 -0.4608324765E-06 -0.4298533484E-06 -0.3974824423E-06 -0.3640993342E-06 -0.3300835997E-06 -0.2958148146E-06 -0.2616725549E-06 -0.2280363962E-06 -0.1952859143E-06 -0.1638006852E-06 -0.1339602845E-06 -0.1061442880E-06 -0.8073271707E-07 -0.5810381123E-07 -0.3863848243E-07 -0.2217586110E-07 -0.1071552306E-07 -0.3017044090E-08 -0.6388707748E-20

12 4

-0.1074393694E+03 -0.1232008716E+03 -0.1144559137E+02 -0.1830948753E+03 -0.3654509730E+03 -0.3456767789E+03 -0.2574998626E+02 -0.2226083744E+03 -0.1679244537E+03 -0.7284870556E+02 -0.3012686545E+02 -0.1207926590E+02 -0.4703876677E+01 -0.1662218179E+01 -0.5433263250E+00 -0.1519098399E+00 -0.2925584435E-01 -0.2999347174E-02 -0.7904358465E-02 -0.6185568881E-02 -0.3844538140E-02 -0.2163891505E-02 -0.1158642699E-02 -0.6047006085E-03 -0.3131242221E-03 -0.1648107337E-03 -0.8689919929E-04 -0.4466536234E-04 -0.2940987161E-04 -0.1412967171E-04 -0.1138786597E-04 -0.4022676949E-05 -0.1879804064E-06 -0.8263412424E-06 -0.1255435132E-05 -0.1679510297E-05 -0.1629505737E-05 -0.1101904895E-05 -0.2095773284E-06 -0.9346074076E-06 -0.2190967931E-05 -0.3312575557E-05 -0.4025689778E-05 -0.4056570083E-05 -0.3232048517E-05 -0.1781247338E-05 -0.3386135855E-07 -0.1680414610E-05 -0.3091208885E-05 -0.4165442302E-05 -0.4929358828E-05 -0.5409202427E-05 -0.5631217066E-05 -0.5621646709E-05 -0.5406735323E-05 -0.5012726872E-05 -0.4468536740E-05 -0.3813765973E-05 -0.3090687036E-05 -0.2341572391E-05 -0.1608694504E-05 -0.934325877E-06 -0.3607388561E-06 -0.6979397684E-07 -0.3270292131E-06 -0.4288394677E-06 -0.405126371E-06 -0.2857915557E-06 -0.1007366508E-06 -0.1201367122E-06 -0.3469269024E-06 -0.5497322889E-06 -0.7044410841E-06 -0.8101008739E-06 -0.8715490874E-06 -0.8936231538E-06 -0.8811605021E-06 -0.8389985615E-06 -0.7719747613E-06 -0.6849265304E-06 -0.5826912981E-06 -0.4701064935E-06 -0.3520095457E-06 -0.2332378839E-06 -0.186289372E-06 -0.1302013481E-07 -0.7875109422E-07 -0.1518473207E-06 -0.2014311555E-06 -0.2226650495E-06 -0.2107116935E-06 -0.1607336184E-06 -0.6931581062E-07 -0.6126708105E-07 -0.2273179923E-06 -0.4251398588E-06 -0.6510356161E-06 -0.9013082000E-06 -0.1172260546E-05 -0.1460195590E-05 -0.1761416267E-05 -0.2072225514E-05 -0.2388926266E-05 -0.2707821457E-05 -0.3025214026E-05 -0.3337406905E-05 -0.3640703033E-05 -0.3931405343E-05 -0.4205816773E-05 -0.4460240256E-05 -0.4690978730E-05 -0.4894335130E-05 -0.5067422813E-05 -0.5210596825E-05 -0.5325027634E-05 -0.5411865707E-05 -0.5472291512E-05 -0.5507465518E-05 -0.5518553191E-05 -0.5506719999E-05 -0.5473131411E-05 -0.5418952893E-05 -0.5345349913E-05 -0.5253487940E-05 -0.5144532440E-05 -0.5019648882E-05 -0.4880002733E-05 -0.4726759460E-05 -0.4561084533E-05 -0.4384143417E-05 -0.4197101582E-05 -0.4001124494E-05 -0.3797377622E-05 -0.3587026432E-05 -0.3371236394E-05 -0.3151172974E-05 -0.2928001640E-05 -0.2702887859E-05 -0.2476997101E-05 -0.2251494831E-05 -0.2027546519E-05 -0.1806317631E-05 -0.1588973635E-05 -0.1376680000E-05 -0.1170602192E-05 -0.9719056796E-06 -0.7817559304E-06 -0.6013184119E-06 -0.4317585919E-06 -0.2742419381E-06 -0.1299339183E-06 -0.1641579952E-19

12 6

0.2293730667E+03 -0.6127596686E+03 -0.7173756578E+03 -0.2841016096E+03 -0.1097004971E+04 -0.2405596618E+03 -0.4768115259E+02 -0.1013238560E+03 -0.9593442724E+02 -0.3959643044E+02 -0.1790428370E+02 -0.7793536858E+01 -0.3115878122E+01 -0.1095787601E+01 -0.3881056208E+00 -0.1203666261E+00 -0.3236417969E-01 -0.6046307003E-02 -0.5154915885E-03 -0.1422259637E-02 -0.1061435824E-02 -0.6095918569E-03 -0.3121062982E-03 -0.1556805697E-03 -0.96514479433E-04 -0.2393102427E-04 -0.1109141324E-04 -0.4893574671E-05 -0.6937804716E-05 -0.6113295371E-05 -0.6808823910E-05 -0.1610818932E-05 -0.6835496361E-05 -0.9088735788E-05 -0.4615007354E-05 -0.1506316231E-05 -0.4123380300E-05 -0.3407667068E-05 -0.8614929693E-06 -0.2012825562E-06 -0.3983281806E-05 -0.4899107894E-05 -0.4879845671E-05 -0.4045036982E-05 -0.2559933577E-05 -0.7726268157E-06 -0.9230820355E-06 -0.213391712E-05 -0.2566840355E-05 -0.2341323572E-05 -0.1677076748E-05 -0.7943341069E-06 -0.8666848606E-07 -0.7456962483E-06 -0.9625141238E-06 -0.5168870588E-06 -0.7302380195E-06 -0.2593186258E-05 -0.4805100822E-05 -0.7099124877E-05 -0.9208401588E-05 -0.1086607412E-04 -0.1180528654E-04 -0.1175917931E-04 -0.1054534795E-04 -0.8319182960E-05 -0.5320525412E-05 -0.1789216361E-05 -0.2034903132E-05 -0.5911992007E-05 -0.9602209204E-05 -0.1286571366E-04 -0.1551007659E-04 -0.1753251828E-04 -0.1897767127E-04 -0.1989016812E-04 -0.2031464139E-04 -0.2029572362E-04 -0.1987804738E-04 -0.1910624520E-04 -0.1802494666E-04 -0.1667879329E-04 -0.1511240866E-04 -0.1337042831E-04 -0.1149744840E-04 -0.9538210681E-05 -0.7537238507E-05 -0.5539200832E-05 -0.3588730207E-05 -0.1730459187E-05 -0.9020323455E-08 -0.1530953830E-05 -0.2854470857E-05 -0.3965098891E-05 -0.4876046204E-05 -0.5600521065E-05 -0.6151731746E-05 -0.6542886516E-05 -0.6871193647E-05 -0.6897861410E-05 -0.6888098074E-05 -0.6771111911E-05 -0.6560111191E-05 -0.6268304185E-05 -0.5908899163E-05 -0.5495104397E-05 -0.5040128157E-05 -0.4558718712E-05 -0.4059464336E-05 -0.3560193296E-05 -0.3072573866E-05 -0.2609814314E-05 -0.2182683608E-05 -0.1792193496E-05 -0.1436916422E-05 -0.1115424831E-05 -0.8262911679E-06 -0.5680878761E-06 -0.3393874003E-06 -0.1387621849E-06 -0.3521532559E-07 -0.1839726869E-06 -0.3089374547E-06 -0.4115371844E-06 -0.4931994319E-06 -0.5553517526E-06 -0.5994217021E-06 -0.6268368362E-06 -0.6390247103E-06 -0.6374128802E-06 -0.6234289014E-06 -0.5985003296E-06 -0.5640547204E-06 -0.5215196293E-06 -0.4723226120E-06 -0.4178912241E-06 -0.3596530213E-06 -0.2990355591E-06 -0.2374663931E-06 -0.1763730790E-06 -0.1171831725E-06 -0.6132422897E-07 -0.1022380420E-07 -0.3469054624E-07 -0.7199126673E-07 -0.1002508017E-06 -0.1180415954E-06 -0.1239360924E-06 -0.1165067369E-06 -0.9432597346E-07 -0.5596624636E-07 -0.3226376500E-19

12 8

0.2142916345E+01 -0.2070490383E+02 -0.2000055279E+03 -0.5289338212E+03 -0.1182349941E+04 -0.1871765419E+04 -0.1666681943E+04 -0.8107176321E+03 -0.6098772294E+03 -0.2457533292E+03 -0.9859300820E+02 -0.3840207477E+02 -0.1494348654E+02 -0.5003680867E+01 -0.1495967503E+01 -0.3486476730E+00 -0.2212923788E-01 -0.4475932413E-01 -0.4192876717E-01 -0.2744794628E-01 -0.1572631719E-01 -0.8416081137E-02 -0.4317129121E-02 -0.2209251491E-02 -0.102251966E-02 -0.5685008499E-03 -0.3013938739E-03 -0.1418995642E-03 -0.7752066940E-04 -0.4332798080E-04 -0.2095380502E-04 -0.8963634248E-05 -0.5067747593E-05 -0.4038866198E-05 -0.4171694346E-05 -0.1176790074E-05 -0.1326123521E-05 -0.5078265041E-06 -0.3143109746E-05 -0.377775947E-05 -0.6360463484E-05 -0.6202165265E-05 -0.5364462832E-05 -0.4288937727E-05 -0.3327157229E-05 -0.2470631562E-05 -0.1620856687E-05 -0.6793285663E-06 -0.4096118752E-06 -0.1530243858E-05 -0.2524001639E-05 -0.3232319475E-05 -0.3209631624E-05 -0.3158372341E-05 -0.2058975884E-05 -0.3987651003E-07 -0.2973338702E-05 -0.6718471387E-05 -0.1084917035E-04 -0.1501908442E-04 -0.1888186238E-04 -0.2496115007E-04 -0.2430060529E-04 -0.2516386784E-04 -0.2444264040E-04 -0.2233082598E-04 -0.1913037846E-04 -0.1514325172E-04 -0.1067139964E-04 -0.6016776092E-05 -0.1481334949E-05 -0.2632969913E-05 -0.6082294308E-05 -0.8855232822E-05 -0.1099848973E-04 -0.1255876932E-04 -0.1358277585E-04 -0.1411721362E-04 -0.1420876869E-04 -0.1390419994E-04 -0.1325015706E-04 -0.1229336251E-04 -0.1108052058E-04 -0.9658335540E-05 -0.8073511671E-05 -0.6372753249E-05 -0.4602764553E-05 -0.2810249858E-05 -0.1049134434E-05 -0.655544150E-06 -0.2235407439E-05 -0.3650983351E-05 -0.4865392835E-05 -0.5881076395E-05 -0.6710303511E-05 -0.7365343649E-05 -0.7858466282E-05 -0.8201940879E-05 -0.8408036911E-05 -0.8489023849E-05 -0.8457171163E-05 -0.8324748325E-05 -0.8104204805E-05 -0.7807270073E-05 -0.7446753601E-05 -0.7347444859E-05 -0.6583513318E-05 -0.6105328448E-05 -0.5612459720E-05 -0.5117717660E-05 -0.4631748574E-05 -0.4168445097E-05 -0.3737275770E-05 -0.3339210692E-05 -0.2972960087E-05 -0.2637234180E-05 -0.230743193E-05 -0.2052197352E-05 -0.1800306880E-05 -0.1573782002E-05 -0.1371332941E-05 -0.1191669921E-05 -0.1033503167E-05 -0.8955429028E-06 -0.7764995322E-06 -0.6750827393E-06 -0.5900032882E-06 -0.5199712231E-06 -0.4636967679E-06 -0.4198901467E-06 -0.3872615837E-06 -0.3645213027E-06 -0.3503795281E-06 -0.3435464837E-06 -0.3427323937E-06 -0.3466474821E-06 -0.3540019729E-06 -0.3635060904E-06 -0.3730700585E-06 -0.3838041012E-06 -0.3920184427E-06 -0.3972233071E-06 -0.3981289183E-06 -0.3934455005E-06 -0.3818832767E-06 -0.3621524739E-06 -0.332963133E-06 -0.2930260200E-06 -0.2410508179E-06 -0.1757479312E-06 -0.9582758384E-07 -0.5575551262E-19

12 10

-0.2087152407E+03 -0.3205555625E+03 -0.7591888502E+03 -0.8900389476E+03 -0.8892123843E+03 -0.9400037267E+03 -0.7184847953E+03 -0.3030403634E+03 -0.2616968659E+03 -0.1083144545E+03 -0.4766907664E+02 -0.1937001626E+02 -0.7670395140E+01 -0.2679153329E+01 -0.8212374861E+00 -0.2184871462E+00 -0.3762962097E-01 -0.7046688535E-02 -0.1246298889E-01 -0.9164295825E-02 -0.5470122920E-02 -0.2941289745E-02 -0.1557979395E-02 -0.7766942866E-03 -0.4042550414E-03 -0.1896376283E-03 -0.9121530341E-04 -0.4627965574E-04 -0.1993511088E-04 -0.1750133963E-04 -0.1027060039E-04 -0.1281889655E-04 -0.4955051016E-05 -0.6887490021E-05 -0.9592789461E-05 -0.901552753E-05 -0.1859141154E-05 -0.1703103416E-05 -0.4641343866E-05 -0.6923743108E-05 -0.8538124569E-05 -0.9550953744E-05 -0.1004835665E-04 -0.1011645929E-04 -0.6846667105E-05 -0.9351503202E-05 -0.8748770110E-05 -0.8156270360E-05 -0.7668212243E-05 -0.7284427100E-05 -0.6981152031E-05 -0.6734624139E-05 -0.6521200552E-05 -0.631678296E-05 -0.6097894548E-05 -0.5840726385E-05 -0.5532157709E-05 -0.5201759612E-05 -0.4889769991E-05 -0.4636426736E-05 -0.4481967743E-05 -0.4466630905E-05 -0.4636054415E-05 -0.5014275267E-05 -0.564149137E-05 -0.6470758032E-05 -0.7446651144E-05 -0.8505457662E-05 -0.9595536778E-05 -0.1065724768E-04 -0.1163294956E-04 -0.1246500161E-04 -0.1310753372E-04 -0.1356177456E-04 -0.1384071351E-04 -0.1395734795E-04 -0.1392467325E-04 -0.1375568479E-04 -0.1346373795E-04 -0.1306074810E-04 -0.1256079061E-04 -0.1197650087E-04 -0.1132087425E-04 -0.1060690612E-04 -0.9847591870E-05 -0.9055926863E-05 -0.8244906480E-05 -0.7427526097E-05 -0.6616781089E-05 -0.5825666834E-05 -0.5067178706E-05 -0.4354312083E-05 -0.3697461112E-05 -0.3096615030E-05 -0.2549161848E-05 -0.2052489575E-05 -0.1603986221E-05 -0.1201039795E-05 -0.8410383070E-06 -0.5213697667E-06 -0.2394221836E-06 -0.7416432605E-08 -0.2217580722E-06 -0.4062147256E-06 -0.5633983832E-06 -0.6959210352E-06 -0.8063946721E-06 -0.8974312842E-06 -0.9716428618E-06 -0.1031641395E-05 -0.1080038875E-05 -0.1119447729E-05 -0.1152083160E-05 -0.1178581095E-05 -0.1199180238E-05 -0.1214197729E-05 -0.1223638707E-05 -0.1227976314E-05 -0.1227371689E-05 -0.1222063973E-05 -0.1212292306E-05 -0.1198295827E-05 -0.1180313678E-05 -0.1158584999E-05 -0.1133489299E-05 -0.1104844610E-05 -0.1073311181E-05 -0.1038987782E-05 -0.1002113554E-05 -0.9629276375E-06 -0.9216691719E-06 -0.8785772979E-06 -0.8338911555E-06 -0.7878498852E-06 -0.7406926271E-06 -0.6926585214E-06 -0.6439867084E-06 -0.5949163284E-06 -0.5456865216E-06 -0.4965364281E-06 -0.4477051883E-06 -0.3994319424E-06 -0.3519558306E-06 -0.3055159932E-06 -0.2603515704E-06 -0.2167017025E-06 -0.1748055296E-06 -0.1349021921E-06 -0.9723083013E-07 -0.6203058396E-07 -0.2954059384E-07 -0.5249338682E-19

12 12

-0.1009664774E+02 -0.1218951136E+03 -0.3205664151E+02 -0.1012381859E+03 -0.3178440759E+02 -0.2678597361E+02 -0.1461391853E+02 -0.1699920599E+02 -0.1262258171E+02 -0.587018284E+01 -0.2617115224E+01 -0.1167723709E+01 -0.4737482394E+00 -0.1719278585E+00 -0.5089291182E-01 -0.1426044838E-01 -0.3139726490E-02 -0.1572007904E-03 -0.4025019713E-03 -0.3570583573E-03 -0.2274627432E-03 -0.1209729334E-03 -0.8457896615E-04 -0.3291926017E-04 -0.1743252836E-04 -0.9358660713E-05 -0.6085263599E-05 -0.2368959707E-05 -0.2327540790E-05 -0.1539679372E-05 -0.2100321088E-05 -0.1400043433E-05 -0.1709806286E-05 -0.3474742589E-05 -0.5393344087E-06 -0.3956169487E-06 -0.8485807099E-06 -0.7013998734E-06 -0.2085573207E-06 -0.3756440669E-06 -0.8379864134E-06 -0.1133551864E-05 -0.1258507571E-05 -0.1209200685E-05 -0.9935287839E-06 -0.66738783102E-06 -0.297080613E-06 -0.5014038770E-07 -0.3191884093E-06 -0.5024686365E-06 -0.6042745504E-06 -0.6288999564E-06 -0.580638578

0.5295004509E-06 0.3237794127E-04 0.3700113444E-04 0.3194836717E-04 0.2519379727E-04 0.1650090831E-04 0.1220857465E-04 0.7694585483E-05 0.3688125878E-05 0.2404619696E-05 0.2471165822E-05 0.2063558113E-05 0.1140695303E-05 0.1072523436E-06 0.6320958145E-06 0.7817942051E-06 0.4827678051E-06 0.1493842308E-07 0.4612795168E-06 0.6619866269E-06 0.6458924464E-06 0.4976076016E-06 0.3017412629E-06 0.1284850670E-06 0.9640939741E-08 0.1145346089E-06 0.1880937918E-06 0.2322126398E-06 0.2448801045E-06 0.2397242937E-06 0.2069426893E-06 0.153048851E-06 0.8371294044E-07 0.5340943954E-08 0.7566341569E-07 0.1528958498E-06 0.2199520698E-06 0.2704277869E-06 0.2979187125E-06 0.2976738184E-06 0.2715551189E-06 0.2230778885E-06 0.1557574020E-06 0.7310893390E-07 0.2135224102E-07 0.1241108481E-06 0.2316516127E-06 0.3408987739E-06 0.4505346257E-06 0.5596809758E-06 0.6674596322E-06 0.7729924024E-06 0.8754010944E-06 0.9738075158E-06 0.1067333474E-05 0.1155100778E-05 0.1236231235E-05 0.1309846652E-05 0.1375068837E-05 0.1431019599E-05 0.1476820744E-05 0.1511594801E-05 0.1513446141E-05 0.1544544561E-05 0.1540965320E-05 0.1522845501E-05 0.1489306913E-05 0.1439842636E-05 0.1375430847E-05 0.1297420992E-05 0.1207162521E-05 0.1106004881E-05 0.9952975224E-06 0.8763898920E-06 0.7506314386E-06 0.6193716107E-06 0.5483959856E-06 0.3457456247E-06 0.2060783635E-06 0.6630752133E-07 0.7221745343E-07 0.2081471124E-06 0.3401320071E-06 0.4668226892E-06 0.5868697103E-06 0.6989236220E-06 0.8016349760E-06 0.8939460568E-06 0.9759660817E-06 0.1048096001E-05 0.1110736764E-05 0.1164289323E-05 0.1209154626E-05 0.1245733625E-05 0.1274427629E-05 0.1295636508E-05 0.1309762294E-05 0.1317205576E-05 0.1318367304E-05 0.1313648428E-05 0.1303449900E-05 0.1288172668E-05 0.1268217684E-05 0.1243985897E-05 0.1215878259E-05 0.1184295718E-05 0.1149639225E-05 0.1112309731E-05 0.1072708185E-05 0.1031235539E-05 0.9882927410E-06 0.9442807429E-06 0.8996004944E-06 0.8546529458E-06 0.8098390472E-06 0.7655597489E-06 0.7222160012E-06 0.6802087542E-06 0.6399389583E-06 0.6018075636E-06 0.5662155204E-06 0.5335637788E-06 0.5042532892E-06 0.4786850018E-06 0.4572598668E-06 0.4403788344E-06 0.4284428548E-06 13 2 0.9347732201E+02 -0.8291196937E+02 -0.1377767106E+02 -0.2654469324E+02 -0.2012009012E+03 0.4675290144E+00 0.1478919163E+03 0.4648451025E+02 -0.5207506951E+02 -0.1507645675E+02 -0.5626214006E+01 -0.2142289748E+01 -0.7847706832E+00 -0.2628392065E+00 -0.7861775928E-01 -0.1840809357E-01 -0.1311132317E-02 0.2188411447E-02 0.2072982123E-02 0.1351527170E-02 0.7713796637E-03 0.4115034250E-03 0.2089442025E-03 0.1077636172E-03 0.5168951870E-04 0.2733873536E-04 0.1504023545E-04 0.8243911093E-05 0.2366825000E-05 0.2262598365E-05 0.2590491551E-05 0.1410637217E-05 0.5353589884E-06 0.2013799060E-06 0.1211311815E-06 0.14778996131E-06 0.1805865240E-06 0.1596957500E-06 0.3613175515E-07 0.2392009966E-06 0.6818804904E-06 0.1173414509E-05 0.1561795283E-05 0.1695007045E-05 0.1471390256E-05 0.9906542900E-06 0.4028547533E-06 0.1419527499E-06 0.5238492317E-06 0.7434628913E-06 0.8315580945E-06 0.8188995674E-06 0.7362519458E-06 0.6143798657E-06 0.4840479631E-06 0.3760208739E-06 0.3140541323E-06 0.2938668661E-06 0.3041691012E-06 0.3336708635E-06 0.3710821790E-06 0.4051130737E-06 0.4244735736E-06 0.4178737046E-06 0.3775458995E-06 0.3098122187E-06 0.2245171291E-06 0.1315050979E-06 0.4062059210E-07 0.382919211E-07 0.9538797467E-07 0.1208231015E-06 0.1070459216E-06 0.5567740329E-07 0.2936839794E-07 0.1441774267E-06 0.2848356274E-06 0.4474284448E-06 0.6280433233E-06 0.8227647075E-06 0.1027679042E-05 0.1238872271E-05 0.1452430340E-05 0.1664439192E-05 0.1870984773E-05 0.2068153027E-05 0.2252029899E-05 0.2418701333E-05 0.2564253273E-05 0.2684771665E-05 0.2776342452E-05 0.2835051580E-05 0.2858081494E-05 0.2847000647E-05 0.2804473993E-05 0.2733166485E-05 0.2635743077E-05 0.2514868723E-05 0.2373208376E-05 0.2213426992E-05 0.2038189523E-05 0.1850160923E-05 0.1652006146E-05 0.1446390145E-05 0.1235977876E-05 0.1023434291E-05 0.8114243445E-06 0.6026129900E-06 0.3996651815E-06 0.2052458727E-06 0.2202001744E-07 0.1473474304E-06 0.3007389470E-06 0.4382267285E-06 0.5604304009E-06 0.6679695902E-06 0.7614639225E-06 0.8415330238E-06 0.9087965202E-06 0.9638740377E-06 0.1007385202E-05 0.1039949640E-05 0.1062186977E-05 0.1074716840E-05 0.1078158853E-05 0.1073132645E-05 0.1060257839E-05 0.1040154063E-05 0.1013440943E-05 0.9807381040E-06 0.9426651727E-06 0.8998417751E-06 0.8528875372E-06 0.8024220851E-06 0.7490650447E-06 0.6934360422E-06 0.6361547035E-06 0.5778406548E-06 0.5917135212E-06 0.4625929313E-06 0.4028985086E-06 0.3466498801E-06 0.2924667716E-06 0.2409685094E-06 0.1927750194E-06 0.1485058277E-06 0.1087805604E-06 0.7421884335E-07 0.4544030277E-07 0.2306456466E-07 0.7711255052E-08 0.1314946653E-21 13 4 -0.2547201462E+02 -0.3290676789E+03 -0.4694333237E+03 -0.1649313213E+02 0.2299096529E+02 0.3262444418E+02 -0.2826975764E+03 -0.4855498584E+02 -0.8483083426E+01 -0.8604222788E+01 -0.3579928115E+01 -0.1612645022E+01 -0.7635455439E+00 -0.2925148546E+00 -0.1173119078E+00 -0.4408510314E-01 -0.1647791969E-01 0.5984760565E-02 -0.2100545041E-02 -0.6977131669E-03 -0.2096842578E-03 -0.5449791489E-04 -0.6601561531E-04 0.1019276408E-04 0.6229265675E-05 0.8501490678E-05 0.6419210775E-05 0.6590172778E-05 0.1619066740E-06 0.3420750209E-05 0.2595319651E-05 0.1772067469E-06 0.2112382448E-05 0.1588448414E-05 0.5450945825E-07 0.1411105515E-05 0.1481434050E-05 0.5983967090E-06 0.5719031091E-06 0.3163362003E-05 0.1284820294E-05 0.5448931844E-06 0.4728604031E-06 0.1384881945E-05 0.1886924218E-05 0.1991993996E-05 0.1792409355E-05 0.1380488770E-05 0.8393131234E-06 0.2150129361E-06 0.4555188641E-06 0.1135389349E-05 0.1787705589E-05 0.2375574656E-05 0.2862103623E-05 0.3210399560E-05 0.3394280506E-05 0.3430480365E-05 0.3346156008E-05 0.3168896308E-05 0.2926002134E-05 0.2644846359E-05 0.2352801853E-05 0.2277241489E-05 0.1840505420E-05 0.1644802933E-05 0.1487310601E-05 0.1365204992E-05 0.1275662678E-05 0.1215860229E-05 0.1182974217E-05 0.1174181210E-05 0.1186814156E-05 0.1218831499E-05 0.1268348057E-05 0.1333478650E-05 0.1412338097E-05 0.1503041218E-05 0.1603702839E-05 0.1712473757E-05 0.1827360815E-05 0.1946586823E-05 0.2068236060E-05 0.2190406967E-05 0.2311237043E-05 0.2428816746E-05 0.2541279797E-05 0.2646734713E-05 0.2743296315E-05 0.2829079423E-05 0.2902198854E-05 0.2960769428E-05 0.3003383690E-05 0.3030545076E-05 0.3043234750E-05 0.3042433875E-05 0.3029123612E-05 0.3004285125E-05 0.2968899576E-05 0.2923948128E-05 0.2870411942E-05 0.2809272183E-05 0.2741510011E-05 0.2668106591E-05 0.2590043084E-05 0.2508300652E-05 0.2423860460E-05 0.2337703668E-05 0.2250811440E-05 0.2164164938E-05 0.2078745324E-05 0.1995533762E-05 0.1915327954E-05 0.1838191765E-05 0.1764005598E-05 0.169268958E-05 0.1624004950E-05 0.1557951279E-05 0.1494369248E-05 0.1433139262E-05 0.1374141726E-05 0.1317257044E-05 0.1262365621E-05 0.1209347861E-05 0.1158084168E-05 0.1108454948E-05 0.1060346004E-05 0.1013621541E-05 0.9681781640E-06 0.9238908768E-06 0.8806400840E-06 0.8383601901E-06 0.7967695998E-06 0.7559107173E-06 0.7156099473E-06 0.6757476942E-06 0.6362043625E-06 0.5968603566E-06 0.5575960811E-06 0.5182919404E-06 0.4788283390E-06 0.4390856814E-06 0.3989443721E-06 0.3582848156E-06 0.3169874162E-06 0.2749325786E-06 0.2320007072E-06 0.1880722665E-06 0.1430274809E-06 0.9674693498E-07 0.4911097319E-07 0.1427463572E-20 13 6 -0.2553645155E+03 0.8972052690E+01 0.5997895146E+03 0.7141075012E+03 0.786451279E+03 -0.5076458186E+03 -0.5858804476E+03 0.6063180176E+02 0.2419146944E+03 0.9559272081E+02 0.3966973943E+02 0.1620245508E+02 0.6180692688E+01 0.2134564478E+01 0.6840656716E+00 0.1949824494E+00 0.4041844674E-01 -0.8084376014E-03 0.17573891324E-02 -0.6303388686E-02 -0.3885349818E-02 -0.1242695505E-02 -0.1121041827E-02 -0.5654901764E-03 -0.2734436656E-03 -0.1383022646E-03 0.712717289E-04 -0.3018523056E-04 -0.1524217267E-04 -0.4804526123E-05 -0.1935967572E-05 -0.1073738047E-04 -0.1043605897E-04 -0.4818721119E-05 -0.2999646605E-05 0.2885859872E-05 -0.6708417000E-06 0.3098846579E-05 0.6788373496E-05 0.8769207583E-05 0.7894188420E-05 0.5080239770E-05 0.1725656449E-05 -0.7649620386E-06 0.1351541913E-05 -0.4520096977E-06 0.1151184873E-05 0.2675592986E-05 0.3499662790E-05 0.3645419598E-05 0.3295783169E-05 0.263367625E-05 0.1842009694E-06 0.1103712068E-05 0.6017002966E-06 0.5188940902E-06 0.9800845427E-06 0.1877548083E-05 0.3045432473E-05 0.4317885475E-05 0.5529054851E-05 0.6513088364E-05 0.710433776E-05 0.7136338849E-05 0.6495538108E-05 0.5274313132E-05 0.3616932261E-05 0.1667663837E-05 0.4292238006E-06 0.2529462309E-05 0.4488783349E-05 0.6126918578E-05 0.7136920231E-05 0.8313122842E-05 0.8823181518E-05 0.899751369E-05 0.8871487504E-05 0.8473045030E-05 0.783509075E-05 0.783509075E-05 0.429446694E-05 0.5967197048E-05 0.4800591229E-05 0.3521082346E-05 0.2160325506E-05 0.7499758189E-06 0.6783116071E-06 0.2092881663E-05 0.3462079241E-05 0.4754249231E-05 0.5973736526E-05 0.6980886016E-05 0.7852042593E-05 0.8527046026E-05 0.9011715591E-05 0.9319365444E-05 0.9463309740E-05 0.9456826233E-05 0.931338279E-05 0.9046050831E-05 0.8668314445E-05 0.8193443275E-05 0.7634751477E-05 0.7005553205E-05 0.6319162613E-05 0.5588893857E-05 0.4828061092E-05 0.4049978471E-05 0.3267960151E-05 0.2495320285E-05 0.1754537028E-05 0.1031432536E-05 0.3668129628E-06 0.2377820315E-06 0.7820907674E-06 0.1268462060E-06 0.1699244725E-05 0.2076787576E-05 0.2403439431E-05 0.2681549103E-05 0.2913465408E-05 0.3101537162E-05 0.3248113179E-05 0.3355542275E-05 0.3426173265E-05 0.3462354965E-05 0.346636189E-05 0.3440765754E-05 0.3387692473E-05 0.3309565163E-05 0.3208732639E-05 0.3087543716E-05 0.2948347209E-05 0.2793491933E-05 0.2625326704E-05 0.2446200338E-05 0.2258461649E-05 0.2064459452E-05 0.1866542564E-05 0.1660759798E-05 0.1468359971E-05 0.1272791897E-05 0.1082704393E-05 0.900446728E-06 0.7283663521E-06 0.5688134461E-06 0.4241363701E-06 0.2966839395E-06 0.1888049694E-06 0.1028482751E-06 0.4116267197E-07 0.6096975168E-08 0.7753176780E-20 13 8 0.3825601537E+03 -0.1137016659E+03 0.6621950223E+03 0.2236250895E+03 0.2319097289E+04 0.1233249176E+04 -0.1788091530E+04 0.4560029089E+03 0.3983651320E+03 0.1576408233E+03 0.6142524616E+02 0.2376745376E+02 0.9149196848E+01 0.3067257409E+01 0.9520613527E+00 0.2435894737E+00 0.3264880049E-01 -0.1621073952E-01 -0.1941589299E-01 -0.1340441662E-01 -0.7825065447E-02 -0.4203601127E-02 -0.2191809526E-02 -0.1077618006E-02 -0.5357487254E-03 0.2929278656E-03 0.1592638998E-03 0.6260070937E-04 0.2798115471E-04 0.1770255158E-04 0.1312430434E-04 0.1250737245E-04 0.4098031970E-05 0.4578752809E-05 0.3909759250E-05 0.7932032512E-07 0.4149528577E-06 0.4668088414E-05 0.9823613670E-05 0.1302550595E-05 0.120146427E-04 0.8423974364E-05 0.3549243668E-05 0.5660703924E-06 0.2476034501E-06 0.2377611794E-05 0.8784895191E-06 0.1413645075E-06 0.3964049585E-05 0.6529760979E-05 0.8940761071E-05 0.1102703167E-04 0.1261855460E-04 0.1354531167E-04 0.1363728469E-04 0.1272445547E-04 0.1071618751E-04 0.7839102845E-05 0.4400277910E-05 0.7051800546E-06 0.2936950648E-05 0.6227942291E-05 0.8853422992E-05 0.1050982085E-04 0.1097532578E-04 0.1036597487E-04 0.8882267051E-05 0.6724701213E-05 0.4093776270E-05 0.1189991128E-05 0.1786155306E-05 0.4634164124E-05 0.7189361441E-05 0.9430373456E-05 0.1137165139E-04 0.1302764646E-04 0.1441280989E-04 0.1554159291E-04 0.1642844672E-04 0.1708782256E-04 0.1753417165E-04 0.1778194519E-04 0.1784559443E-04 0.1773957057E-04 0.1747832483E-04 0.1707630844E-04 0.1654797263E-04 0.1590776860E-04 0.1517014758E-04 0.1434956079E-04 0.1346045946E-04 0.1251729480E-04 0.1153307932E-04 0.1051507703E-04 0.9469087999E-05 0.8400950117E-05 0.7316476069E-05 0.6221484841E-05 0.5121795418E-05 0.4023226784E-05 0.2931597925E-05 0.1852727826E-05 0.7924354716E-06 0.2434601522E-06 0.1249140061E-05 0.2218785268E-05 0.3146576790E-05 0.4026695642E-05 0.4853322837E-05 0.5620639391E-05 0.6322826319E-05 0.6954064636E-05 0.7509984985E-05 0.7992016521E-05 0.8403303803E-05 0.8745928300E-05 0.902356611E-05 0.9238830250E-05 0.9394599501E-05 0.9493752651E-05 0.9539168482E-05 0.9533725781E-05 0.9480303332E-05 0.9381779920E-05 0.9241034331E-05 0.9060945347E-05 0.8844391756E-05 0.8594252341E-05 0.8313405887E-05 0.8004731180E-05 0.7671107004E-05 0.7315412144E-05 0.6940525385E-05 0.6549325511E-05 0.644691308E-05 0.5729501561E-05 0.5306635054E-05 0.4878970572E-05 0.4449386900E-05 0.4020762823E-05 0.3595977126E-05 0.3177908594E-05 0.27694360

0.1681381966E-05 -0.1990870818E-05 -0.2255396675E-05 -0.2477135164E-05 -0.2658261916E-05 -0.2800952558E-05 -0.2907382720E-05 -0.2979728030E-05 -0.3020164117E-05 -0.3030866611E-05 -0.3014011139E-05 -0.2971773317E-05 -0.2906328816E-05 -0.2819853222E-05 -0.2714522178E-05 -0.2592511313E-05 -0.2455996256E-05 -0.2307152636E-05 -0.2148156081E-05 -0.1981182221E-05 -0.1808406683E-05 -0.1632005098E-05 -0.1454153093E-05 -0.1277026298E-05 -0.1102800342E-05 -0.9336508526E-06 -0.7717534593E-06 -0.6192837910E-06 -0.4784174764E-06 -0.3513301444E-06 -0.2401974237E-06 -0.1471949433E-06 -0.7449833186E-07 -0.2428321828E-07 0.1274768609E-08 -0.2866329818E-20

13 12

0.2872832046E+03 -0.3478514122E+03 -0.1627224250E+03 0.3375045633E+03 0.3420985198E+02 -0.1629108832E+03 -0.7248453071E+02 0.4240253809E+02 0.3505239677E+02 0.1744189918E+02 0.7572632473E+01 0.3219761415E+01 0.1303596381E+01 0.4755148262E+00 0.1430334915E+00 0.4968698824E+00 0.9570497059E-02 0.9342324730E-03 -0.8449431095E-03 -0.8351963391E-03 -0.5465344062E-03 -0.2752715947E-03 -0.1555803490E-03 -0.8336251577E-04 -0.3920193294E-04 -0.1517689217E-04 -0.1211130790E-04 -0.4606499046E-05 -0.1871467123E-05 0.1143570786E-05 -0.2562867967E-05 -0.2820166456E-05 -0.3915989616E-05 -0.4356310330E-05 -0.1104920365E-05 0.2981971750E-05 0.4486342829E-05 0.3635327826E-05 0.1567351229E-05 -0.5791624733E-06 -0.1898070845E-05 -0.2412359666E-05 -0.2377296767E-05 -0.2048149981E-05 -0.1643561939E-05 -0.1235674474E-05 -0.8600042157E-06 -0.5520677965E-06 -0.3400133218E-06 -0.2225147926E-06 -0.1908776840E-06 -0.2364074110E-06 -0.3504096287E-06 -0.5241896322E-06 -0.7490529564E-06 -0.1016305077E-05 -0.1313169776E-05 -0.1610544074E-05 -0.1875243297E-05 -0.2074082771E-05 -0.2173877825E-05 -0.2141443784E-05 -0.1943595977E-05 -0.1547149729E-05 -0.9325758008E-06 -0.1349666809E-06 0.7969297095E-06 0.1814365449E-05 0.2868592617E-05 0.3910863291E-05 0.4892429551E-05 0.5764543474E-05 0.6488247628E-05 0.7063746522E-05 0.7501035157E-05 0.7810108529E-05 0.8000961638E-05 0.8083589481E-05 0.8067987058E-05 0.7964149366E-05 0.7782071405E-05 0.7531748717E-05 0.7223174665E-05 0.6866345883E-05 0.6471256825E-05 0.6047902489E-05 0.5606277873E-05 0.5156377976E-05 0.4708197796E-05 0.4271732331E-05 0.3856976580E-05 0.3473925541E-05 0.3130523558E-05 0.2826512352E-05 0.2559582992E-05 0.2327426545E-05 0.212734077E-05 0.1958196665E-05 0.181650351E-05 0.1700351227E-05 0.1607425353E-05 0.1535418795E-05 0.148202261E-05 0.144927899E-05 0.1421825695E-05 0.1410407077E-05 0.1408363113E-05 0.1413384870E-05 0.1423163415E-05 0.1435389815E-05 0.1447755138E-05 0.1457950451E-05 0.1464079637E-05 0.1465897841E-05 0.1463573023E-05 0.1457273143E-05 0.1447166163E-05 0.1433420041E-05 0.1416202739E-05 0.1395682217E-05 0.1372026436E-05 0.1345403355E-05 0.1315980934E-05 0.1283927135E-05 0.1249409918E-05 0.1212597243E-05 0.1173657070E-05 0.11327537359E-05 0.1090066072E-05 0.1045751168E-05 0.9999806075E-06 0.9529223511E-06 0.9047443592E-06 0.8556145919E-06 0.80570110097E-06 0.75715729E-06 0.7041942418E-06 0.6529369769E-06 0.601567738E-06 0.5502544866E-06 0.4991651820E-06 0.448467848E-06 0.3983302555E-06 0.3489205543E-06 0.3004066417E-06 0.2529564778E-06 0.2067380232E-06 0.1619192381E-06 0.1186680829E-06 0.7715251792E-07 0.3754050350E-07 -0.3175557198E-20

14 0

0.5645945482E+02 -0.2531385379E+03 -0.4044301111E+03 0.1022929609E+03 0.5188456418E+03 0.4749175934E+03 -0.5633423845E+02 -0.3623266696E+03 -0.3765835997E+03 -0.5162379934E+02 0.5614920696E+02 0.4969930671E+02 0.1938604974E+02 0.7177554945E+01 0.2564836368E+01 0.8906272675E+00 0.3006463557E+00 0.9810666363E-01 0.3048944078E-01 0.8700251377E-02 0.2038129951E-02 0.1853063066E-03 -0.2251913445E-03 -0.2405477265E-03 -0.1800208225E-03 -0.1220768498E-03 -0.175976582E-04 -0.5004546398E-04 -0.3203326732E-04 -0.2065915261E-04 -0.1352467298E-04 -0.7712407421E-05 -0.4501909246E-05 -0.3125220961E-05 -0.22370799506E-05 -0.1625782620E-05 -0.1364350559E-05 -0.1330172835E-05 -0.1364291273E-05 -0.1307747700E-05 -0.1048270735E-05 -0.6603361686E-06 -0.2651065854E-06 0.1625541128E-07 0.9457911738E-07 0.8660987813E-08 -0.1707106227E-06 -0.3727473796E-06 -0.5388796065E-06 -0.6594122602E-06 -0.7368689560E-06 -0.7737733091E-06 -0.7726489346E-06 -0.7360194479E-06 -0.6664084640E-06 -0.5663395983E-06 -0.4395314531E-06 -0.2944825800E-06 -0.1408865177E-06 0.1156319498E-07 0.15317320193E-06 0.2742494164E-06 0.3650988476E-06 0.4160277742E-06 0.420257846E-06 0.3826693769E-06 0.3110591762E-06 0.2312230078E-06 0.9695689698E-07 -0.2994313104E-07 -0.1596810510E-06 -0.2844608376E-06 -0.3978384114E-06 -0.4987774753E-06 -0.5875936783E-06 -0.6646026692E-06 -0.7301200966E-06 -0.7844616095E-06 -0.8279428566E-06 -0.8608794867E-06 -0.8835871486E-06 -0.8963814912E-06 -0.8995781631E-06 -0.8934928133E-06 -0.8784410905E-06 -0.8547386435E-06 -0.8227011211E-06 -0.7826441721E-06 -0.7348834453E-06 -0.6797345895E-06 -0.6175132535E-06 -0.5485350862E-06 -0.4731931878E-06 -0.3921904652E-06 -0.3063072767E-06 -0.2163239808E-06 -0.1230203958E-06 -0.27177850006E-07 0.7042296798E-07 0.1690031100E-06 0.2677815675E-06 0.3659779823E-06 0.4628119958E-06 0.5575032498E-06 0.6492713859E-06 0.7373360456E-06 0.8209168706E-06 0.8992335025E-06 0.9715055837E-06 0.1036952754E-05 0.1094794656E-05 0.1144250932E-05 0.1184728570E-05 0.1216383947E-05 0.1239560788E-05 0.1254602818E-05 0.1261853761E-05 0.1261657340E-05 0.1254357281E-05 0.1240297309E-05 0.1121982114E-05 0.1193272519E-05 0.1160995151E-05 0.1123332767E-05 0.1086269092E-05 0.103327849E-05 0.9814727628E-06 0.9257075584E-06 0.8662759601E-06 0.8035216922E-06 0.7377884792E-06 0.6694200455E-06 0.5987601156E-06 0.5261524139E-06 0.4519406648E-06 0.3764685922E-06 0.3000792222E-06 0.2231183776E-06 0.1459276833E-06 0.6885156392E-07 -0.7766256251E-08 0.8358205273E-07 -0.1580211011E-06 -0.2314326769E-06 -0.3027800557E-06 -0.3719505131E-06 -0.4386003246E-06 -0.5023857658E-06 -0.5629631122E-06 -0.6199886395E-06 -0.6731186231E-06 -0.7220093387E-06

14 2

-0.1475448594E+03 0.1723004546E+03 0.1548909870E+03 -0.1048167538E+03 -0.2413388353E+03 -0.1774281021E+03 -0.6778731169E+02 -0.1163676088E+02 -0.910809190E+01 0.7366157090E+00 0.7457177418E+00 0.2627460339E+00 0.5946691210E-01 0.3455736396E-01 0.1082769750E-01 0.287233797E-02 0.3752523542E-03 -0.1980629597E-03 -0.2312698627E-03 -0.1597931741E-03 -0.9286678514E-04 -0.4965685397E-04 -0.26465560049E-04 -0.1081631106E-04 -0.3088454696E-05 -0.2237624460E-05 -0.1132954572E-05 -0.7657345351E-06 0.6463902472E-06 -0.2093386902E-07 -0.2323542052E-06 -0.418062835E-06 0.1178204657E-05 0.1328905076E-05 0.4525077427E-06 0.657401342E-06 -0.1140197224E-06 -0.107085569E-05 -0.7804795426E-06 -0.5687923408E-06 -0.6711600889E-06 -0.9766106364E-06 -0.1288894764E-05 -0.411763252E-05 -0.1207440219E-06 -0.7720431364E-06 -0.2601628116E-06 0.1736099467E-06 0.4072725764E-06 0.4488155023E-06 0.3390423955E-06 0.1185769274E-06 -0.1791122308E-06 -0.4917564079E-06 -0.8002869324E-06 -0.1056835133E-05 -0.1229066000E-05 -0.1317979162E-05 -0.1332907913E-05 -0.1283185542E-05 -0.1178145341E-05 -0.1027120602E-05 -0.839446149E-06 -0.6244506722E-06 -0.390973288E-06 -0.1453241969E-06 0.1063538475E-06 0.3581819282E-06 0.6042151689E-06 0.8385086935E-06 0.1055117626E-05 0.1248097090E-05 0.1412808764E-05 0.1549840551E-05 0.1661068908E-05 0.1748442290E-05 0.1813801156E-05 0.1859057963E-05 0.1886107166E-05 0.1896843224E-05 0.1893160593E-05 0.1876953730E-05 0.1850117093E-05 0.1814545138E-05 0.1772132322E-05 0.1724773102E-05 0.1674361935E-05 0.1622793279E-05 0.1571961589E-05 0.1523761324E-05 0.1480086940E-05 0.1442832894E-05 0.1413471374E-05 0.1391785486E-05 0.1377136071E-05 0.1368883965E-05 0.1366390008E-05 0.1369015038E-05 0.1376119893E-05 0.1387065411E-05 0.1401212430E-05 0.1417921790E-05 0.1436554327E-05 0.1456470882E-05 0.1477032291E-05 0.1497599393E-05 0.1517533027E-05 0.1536194030E-05 0.1552943242E-05 0.1567141500E-05 0.1578149643E-05 0.158352809E-05 0.1588173391E-05 0.1586717401E-05 0.1581128105E-05 0.1571573070E-05 0.1558219862E-05 0.1541236047E-05 0.1520879193E-05 0.1497046865E-05 0.1470176630E-05 0.1440346055E-05 0.1407722705E-05 0.1372474148E-05 0.1334767949E-05 0.1294771676E-05 0.1252652894E-05 0.1208579171E-05 0.1162718072E-05 0.1115237164E-05 0.1066304013E-05 0.1016086186E-05 0.9647512498E-06 0.917512498E-06 0.8594003138E-06 0.8057194471E-06 0.7515917366E-06 0.6971847486E-06 0.6426660497E-06 0.5882032063E-06 0.5339637848E-06 0.4801153516E-06 0.4268254733E-06 0.3742617163E-06 0.3225916470E-06 0.271983219E-06 0.2226028374E-06 0.1746192300E-06 0.1281995761E-06 0.8351144216E-07 0.4072239465E-07 -0.2207586403E-20

14 4

0.1913006618E+03 -0.6069188554E+02 -0.2491536000E+03 -0.4092440459E+03 -0.1986651452E+03 -0.9393979655E+02 -0.5596525752E+03 0.9217846496E+01 0.6900466897E+02 0.2217778133E+02 0.8553709523E+01 0.3201558096E+01 0.1082945106E+01 0.3653844409E+00 0.1024197587E+00 0.226113567E+01 0.1287005536E-03 -0.3866311437E-02 -0.3229365982E-02 -0.2006787469E-02 -0.1105202260E-02 -0.5715494872E-03 -0.2863260205E-03 -0.1364486287E-03 -0.708754488E-04 -0.3288933028E-04 -0.1457529502E-04 -0.6194849149E-05 0.1668621799E-05 -0.2339397138E-05 0.42643455892E-05 -0.3344650198E-05 -0.5174543500E-05 -0.1383780122E-05 0.2025158709E-06 -0.3171692797E-06 0.2549388507E-07 0.5326502953E-06 0.1316885639E-06 0.2167788017E-05 0.2915201559E-05 0.3351994504E-05 0.3311291122E-05 0.2617215680E-05 0.1181732418E-05 -0.1813545291E-06 -0.2772321058E-05 -0.4588563063E-05 -0.5899530212E-05 -0.6704741667E-05 -0.7073841364E-05 -0.10738460439E-05 -0.6782308226E-05 -0.6260974062E-05 -0.5582127282E-05 -0.4815417221E-05 -0.4022777993E-05 -0.323528280E-05 -0.2476289702E-05 -0.1769156641E-05 -0.1137241636E-05 -0.6039026873E-06 -0.1924977962E-06 0.7361503747E-06 0.1803450699E-06 0.1506705844E-06 0.1683712093E-07 -0.1889097807E-06 -0.4343245804E-06 -0.6871617383E-06 -0.9151757145E-06 -0.1086120969E-06 -0.1174440404E-05 -0.1181330692E-05 -0.1114676945E-05 -0.9823642783E-06 -0.7922778050E-06 -0.5523026390E-06 -0.2703238942E-06 0.4577331576E-07 0.388108770E-06 0.7487826758E-06 0.1119924598E-05 0.1493644531E-05 0.1862057359E-05 0.2217277970E-05 0.2551421250E-05 0.2856602084E-05 0.3124935359E-05 0.3348535962E-05 0.3519518778E-05 0.362998693E-05 0.3674245715E-05 0.3655150332E-05 0.3577758151E-05 0.3447114782E-05 0.3268265833E-05 0.3046259913E-05 0.2786133630E-05 0.2492941593E-05 0.2171726411E-05 0.1827533692E-05 0.1465409045E-05 0.1090398077E-05 0.7075463991E-06 0.3218996182E-06 -0.6149665661E-06 -0.3975968168E-06 -0.8013552538E-06 -0.1147726359E-05 -0.1471664524E-05 -0.1768124140E-05 0.2033103809E-05 -0.2266778976E-05 -0.2470369298E-05 -0.2645094430E-05 0.2792174028E-05 -0.2912827748E-05 -0.3008275246E-05 -0.3079736178E-05 -0.3128430199E-05 -0.3155576966E-05 -0.3162396135E-05 -0.3150107361E-05 -0.3119930301E-05 0.3073084609E-05 -0.3010789943E-05 -0.2934265958E-05 -0.2844732310E-05 -0.2743048655E-05 -0.2631514648E-05 -0.2510269947E-05 -0.2380894206E-05 -0.2244607081E-05 -0.210628229E-05 -0.1956177305E-05 -0.1806473966E-05 -0.1654737867E-05 -0.1502188663E-05 -0.1350046012E-05 -0.1199529568E-05 -0.105185899E-05 -0.9082539288E-06 -0.7699340444E-06 -0.6381189916E-06 -0.5140284261E-06 -0.3988820040E-06 -0.2938993811E-06 -0.2003002134E-06 -0.1193041566E-06 -0.5213086689E-07 -0.2581108757E-19

14 6

-0.2450395164E+03 -0.2978982034E+03 -0.7263391427E+02 0.7829463070E+03 -0.5396749207E+03 -0.4671617806E+03 -0.6680636007E+03 0.3741727658E+02 0.2100919753E+03 0.8407658025E+02 0.3261445062E+02 0.1338517305E+02 0.5115860096E+01 0.1747710654E+01 0.5869260651E+00 0.3828808070E-01 0.2474428253E-02 -0.4523963777E-02 -0.4157710005E-02 -0.2657219809E-02 -0.1478178153E-02 -0.7713878443E-03 -0.3945173531E-03 -0.1894457885E-03 -0.9822484180E-04 -0.4245266821E-04 -0.2830571099E-04 -0.8440021629E-05 -0.1250383769E-04 0.2172897565E-05 -0.6648765128E-05 -0.1180781259E-04 -0.8635031441E-05 -0.4344367286E-05 0.1076755392E-05 0.5029049043E-06 0.5608476054E-06 -0.5289099511E-06 -0.2392350427E-05 -0.4603266693E-05 -0.6526692448E-05 -0.7475471598E-05 -0.6762448005E-05 -0.4001438613E-05 -0.1015170207E-04 0.4092731366E-05 0.7188529275E-05 0.8417210471E-05 0.7953342455E-05 0.6230142491E-05 0.3680827842E-05 0.7386157744E-06 -0.2163276449E-05 -0.4591631564E-05 -0.6113232306E-05 -0.6415797880E-05 -0.5670793368E-05 -0.4170620319E-05 -0.2207680284E-05 -0.7437481340E-07 0.1936894542E-05 0.3533726233E-05 -0.4423718708E-05 0.4393406898E-05 0.3545071661E-05 0.205930333E-05 0.1192002524E-06 -0.2095901243E-05 -0.4404156816E-05 -0.6624341928E-05 -0.8575260842E-05 -0.110110422E-04 -0.1122708996E-04 -0.1195430834E-04 -0.1232348965E-04 -0.1236545418E-04 -0.1211102223E-04 -0.1159101470E-04 -0.1083625000E-04 -0.9877550318E-05 -0.8745

0.4765569280E-06 0.5254197779E-06 -0.6240524172E-06 -0.3199839596E-05 -0.6923290736E-05 -0.1138909708E-04 -0.1619194985E-04 -0.2092654031E-04 -0.2518755967E-04 -0.285699919E-04 -0.3066765009E-04 -0.3118869985E-04 -0.3029052082E-04 -0.2842381746E-04 -0.2531755077E-04 -0.2178329692E-04 -0.1791088865E-04 -0.139705454E-04 -0.1023268319E-04 -0.60917890623E-05 -0.4048822692E-05 -0.1598552685E-05 0.4598461048E-05 0.2153300388E-05 0.3508736871E-05 0.4553082264E-05 0.5313262376E-05 0.5816206613E-05 0.6088838986E-05 0.6158087103E-05 0.6050877671E-05 0.5794137400E-05 0.5414792999E-05 0.4939771174E-05 0.4395998637E-05 0.4831042093E-05 0.3209908253E-05 0.2621443825E-05 0.2071935517E-05 0.1583216055E-05 0.1156742232E-05 0.7888768590E-06 0.4759827470E-06 0.2144227064E-06 0.5595497979E-09 -0.1692439177E-06 -0.2986248779E-06 -0.3912205280E-06 -0.4506680514E-06 -0.4806046392E-06 -0.4846674810E-06 -0.4664937660E-06 -0.4297206835E-06 -0.3779854229E-06 -0.3149251735E-06 -0.2441771247E-06 -0.1693784657E-06 -0.9416638592E-06 -0.2217807468E-07 0.4359835790E-07 0.1027711185E-06 0.1555974931E-06 0.2023347676E-06 0.2432402280E-06 0.2785711600E-06 0.3085848497E-06 0.3335385830E-06 0.3536896458E-06 0.3692953240E-06 0.3806129035E-06 0.3878996703E-06 0.3914129102E-06 0.3914099092E-06 0.3881479533E-06 0.3818843283E-06 0.3728763201E-06 0.3613812147E-06 0.3476562980E-06 0.3319588560E-06 0.3145461744E-06 0.2956755393E-06 0.2756042366E-06 0.2545895522E-06 0.2328887720E-06 0.2107591819E-06 0.1884580679E-06 0.1662427158E-06 0.1443704117E-06 0.1230984413E-06 0.1026840907E-06 0.8338464575E-07 0.6545739237E-07 0.4915961647E-07 0.3474860400E-07 0.2248164085E-07 0.1261601296E-07 0.5409006239E-08 0.1117906613E-08 -0.9292987401E-20 14 10 -0.6399119434E+03 -0.5258818954E+03 0.1338669242E+04 -0.2385066997E+03 -0.2367183883E+04 0.1054445574E+04 0.1503841335E+04 -0.2871663261E+03 -0.3350065036E+03 -0.1334979484E+03 -0.6043423383E+02 -0.2508934870E+02 -0.1019897182E+02 -0.3580996926E+01 -0.1124088029E+01 -0.3252369903E+00 -0.7635060961E-01 -0.7580059968E-02 0.6703673772E-02 0.6759440479E-02 0.4396491156E-02 0.2397457940E-02 0.1333178401E-02 0.6251993196E-03 0.3617397739E-03 0.1551946383E-03 0.6617878258E-04 0.3776910356E-04 -0.5121548571E-05 0.1886669906E-04 0.2799752856E-05 0.2572163247E-04 0.1034763541E-04 -0.225558033E-04 -0.2495828065E-04 -0.182383480E-05 0.4059947124E-05 0.1070368413E-04 0.1308965723E-04 0.1324885109E-04 0.1292944631E-04 0.1289240703E-04 0.1365189333E-04 0.1572206528E-04 0.8734789571E-04 0.2396760860E-04 0.2767024073E-04 0.3016482886E-04 0.3034468461E-04 0.2843021900E-04 0.2490611791E-04 0.2025706723E-04 0.149675284E-04 0.9522860614E-05 0.4407076437E-05 0.1050861895E-06 -0.3000187887E-05 -0.493287811E-05 -0.5818880438E-05 -0.5784090827E-05 -0.4954405233E-05 -0.3455719615E-05 -0.131929928E-05 0.1045067868E-05 0.3801381273E-05 0.6759131602E-05 0.982843625E-05 0.1291944211E-04 0.1594225184E-04 0.1880699756E-04 0.2142380407E-04 0.2470279612E-04 0.2557337887E-04 0.2704207901E-04 0.2887705976E-04 0.2929495452E-04 0.2941419495E-04 0.2926058814E-04 0.2885994116E-04 0.2823806109E-04 0.2742075499E-04 0.2643382994E-04 0.2530309301E-04 0.2405435128E-04 0.2271341182E-04 0.2130608170E-04 0.1985816799E-04 0.1839547778E-04 0.1694381812E-04 0.1552899611E-04 0.1417681880E-04 0.1290822215E-04 0.1172465761E-04 0.1062270554E-04 0.9598946255E-05 0.8649960102E-05 0.7772327417E-05 0.6962628536E-05 0.6217443795E-05 0.553353534E-05 0.4906938088E-05 0.4334777949E-05 0.3813452990E-05 0.3339544012E-05 0.2909631198E-05 0.2520294885E-05 0.2168115410E-05 0.1849673101E-05 0.1561548321E-05 0.1300321382E-05 0.1062572629E-05 0.8453269770E-06 0.6473876537E-06 0.4680024644E-06 0.3064192144E-06 0.1618857091E-06 0.3364975390E-07 -0.7904084580E-07 -0.1769382846E-06 -0.2607947573E-06 -0.3313624582E-06 -0.3893935822E-06 -0.4356403238E-06 -0.4708548777E-06 -0.4857894384E-06 -0.5111962006E-06 -0.5178273589E-06 -0.5164351079E-06 -0.5077716423E-06 -0.4925891566E-06 -0.4716398455E-06 -0.4456759036E-06 -0.4154495255E-06 -0.3917129058E-06 -0.3452182393E-06 -0.3067177204E-06 -0.2669635438E-06 -0.2267079041E-06 -0.1867209959E-06 -0.1477010139E-06 -0.1104541527E-06 -0.0751460694E-07 -0.4423457116E-07 -0.1676624002E-07 0.5938191865E-08 0.2312652987E-07 0.3404657937E-07 0.3794614576E-07 0.3407303441E-07 0.2167505069E-07 0.9776104322E-19 14 12 0.2394088588E+03 0.3679599973E+03 -0.8889519150E+03 0.6001142847E+03 0.1179573075E+03 -0.3022895236E+03 -0.1442704039E+03 0.7479419246E+02 0.6749519534E+02 0.3180568873E+02 0.1465697312E+02 0.6913307215E+01 0.2865910954E+01 0.1041662655E+01 0.3074059654E+00 0.896329732E+01 0.2252816293E-01 0.3497238414E-02 -0.8571680632E-03 -0.1249297343E-02 -0.8659121081E-03 -0.4589703770E-03 -0.3465467998E-03 -0.1359857981E-03 -0.717355512E-04 -0.3214105610E-04 -0.2807590483E-04 -0.1208593493E-04 -0.1356905172E-04 -0.4392835031E-06 0.1161040998E-04 -0.6831591494E-05 -0.6552633029E-05 0.4512961608E-05 0.5087938326E-05 -0.7296908023E-06 -0.4377462779E-05 -0.4810209633E-05 -0.2862127189E-05 0.6325960079E-06 0.4833187204E-05 0.8872536812E-05 0.1187695104E-04 0.1297273608E-04 0.1159707598E-04 0.8430666074E-05 0.4465079553E-05 0.6918895907E-06 -0.2085909959E-05 -0.3819970832E-05 -0.4650318910E-05 -0.4717144218E-05 -0.4160595745E-05 -0.3120822481E-05 -0.1737973414E-05 -0.1521975342E-06 0.1504198549E-05 0.312078102E-05 0.4632946546E-05 0.5919109481E-05 0.6895672463E-05 0.746951048E-05 0.574620791E-05 0.7036817249E-05 0.5883326452E-05 0.4190506329E-05 0.2101005285E-05 -0.2425282767E-06 -0.2697445951E-05 -0.5121099334E-05 -0.7370840021E-05 -0.9304019609E-05 -0.1080714875E-04 -0.1188337432E-04 -0.1256500224E-04 -0.1288433846E-04 -0.1287368890E-04 -0.1256535949E-04 -0.1199165618E-04 -0.111848847E-04 -0.1017735152E-04 -0.9001362052E-05 -0.7689222394E-05 -0.6273238481E-05 -0.4785716245E-05 -0.3258961616E-05 -0.1725280527E-05 -0.2169789094E-06 0.1233637305E-05 0.2594622185E-05 0.3832589798E-05 0.4916314213E-05 0.5820408216E-05 0.6548959467E-05 0.7113334345E-05 0.7524899226E-05 0.7795026049E-05 0.7935064512E-05 0.7956397762E-05 0.7870386348E-05 0.7688396917E-05 0.7421795758E-05 0.7081949484E-05 0.6680223765E-05 0.6227985688E-05 0.5736601393E-05 0.5217437260E-05 0.7681895666E-05 0.4614123498E-05 0.3606929605E-05 0.3090309895E-05 0.2602742236E-05 0.2153445993E-05 0.1743052489E-05 0.1370046030E-05 0.1032910927E-05 0.403134881E-06 0.4401920224E-06 0.2215768389E-06 0.1277024647E-07 -0.1677434460E-06 -0.3214799295E-06 -0.4499548952E-06 -0.5546840431E-06 -0.6371830373E-06 -0.6989675959E-06 -0.7415534009E-06 -0.7664561434E-06 -0.7751915145E-06 -0.7692752053E-06 -0.7502229067E-06 -0.7195503100E-06 -0.6787731061E-06 -0.6294069861E-06 -0.5729676412E-06 -0.5109707623E-06 -0.4449320406E-06 -0.3763671670E-06 -0.3067918328E-06 -0.2377217289E-06 -0.1706725465E-06 -0.1071599765E-06 -0.4869971013E-07 0.3192561618E-06 0.4700111475E-07 0.8421035690E-07 0.1043044983E-06 0.110848132E-06 0.9173960466E-07 0.5521656393E-07 -0.2724864942E-19 14 14 -0.2266402601E+02 -0.5838497948E+02 -0.7895839806E+02 0.1593447913E+02 0.4673347680E+02 -0.3830405984E+01 0.2850451941E+01 -0.2552107024E+01 -0.1720537350E+01 -0.1111015854E+01 -0.4659867909E+00 -0.2202539031E+00 -0.8491268388E-01 -0.3523284589E-01 -0.9650334995E-02 -0.2771027666E-02 -0.7015895938E-03 -0.1220102412E-03 0.1715143737E-04 0.2735567172E-04 0.2292896037E-04 0.4737581350E-05 0.4406348847E-04 0.2622542889E-05 0.2698638474E-05 -0.1124105417E-05 -0.2356731089E-05 -0.1053293548E-05 0.5623970834E-06 -0.3602507889E-07 -0.1241713317E-06 0.4620451347E-06 0.8190864743E-06 0.1010630068E-05 0.1246218226E-05 0.1294702449E-05 0.9214020003E-06 0.3181979981E-06 -0.2163879734E-06 -0.383843302E-06 0.1330185561E-07 0.7681488884E-06 0.1572756417E-05 0.2119174089E-05 0.2179660300E-05 0.1847308431E-05 0.1295240608E-05 0.6972989594E-06 0.1948972512E-06 -0.1952241900E-06 -0.4878533980E-06 -0.697784067E-06 -0.8397872500E-06 -0.9286679616E-06 -0.9792085755E-06 -0.1006197125E-05 -0.1021854527E-05 -0.1028133221E-05 -0.1024418530E-05 -0.1010095778E-05 -0.9845502869E-06 -0.9471673792E-06 -0.8973323780E-06 -0.8344306060E-06 -0.7586023964E-06 -0.6730081248E-06 -0.5815631770E-06 -0.4881829391E-06 -0.3967827969E-06 -0.3112781365E-06 -0.2355843438E-06 -0.1736168048E-06 -0.1284024525E-06 -0.9941440845E-07 -0.8523734116E-07 -0.8445591922E-07 -0.9564581120E-07 -0.1174186857E-06 -0.1483322112E-06 -0.1869800563E-06 -0.2319468897E-06 -0.2848173798E-06 -0.3351761952E-06 -0.3906080048E-06 -0.4466973673E-06 -0.5020292792E-06 -0.5551880816E-06 -0.6047585523E-06 -0.6493253596E-06 -0.6874731723E-06 -0.7177866589E-06 -0.7388504880E-06 -0.7496124676E-06 -0.7504729640E-06 -0.7421954831E-06 -0.7255435307E-06 -0.7012806125E-06 -0.6701702343E-06 -0.6329759021E-06 -0.5904611215E-06 -0.5433893985E-06 -0.4925242387E-06 -0.4386291481E-06 -0.3824676324E-06 -0.3248031974E-06 -0.266393485E-06 -0.2080195929E-06 -0.1504273449E-06 -0.9438638096E-07 -0.4065993678E-07 0.9988391820E-08 0.5679509902E-07 0.9915271203E-07 0.1307778901E-06 0.1707433529E-06 0.2003217105E-06 0.2259837374E-06 0.2479080985E-06 0.2662614859E-06 0.2812185921E-06 0.2929521092E-06 0.3016347295E-06 0.3074391453E-06 0.3105380498E-06 0.3311041326E-06 0.339100885E-06 0.3053286090E-06 0.2993323864E-06 0.2914941129E-06 0.2819864807E-06 0.2709821823E-06 0.2586539097E-06 0.2451743554E-06 0.2307162115E-06 0.2154521704E-06 0.1995549243E-06 0.1831971654E-06 0.1665515861E-06 0.1497908786E-06 0.1330877353E-06 0.1166148482E-06 0.1005449098E-06 0.8505061234E-07 0.7030464802E-07 0.5647970914E-07 0.4374848797E-07 0.3228367678E-07 0.2225796784E-07 0.1384405342E-07 0.7214625795E-08 0.2542377232E-08 0.1194265891E-20 15 0 -0.2682148458E+02 0.1419146483E+03 0.2482033082E+03 -0.3751584838E+02 -0.2694717060E+03 -0.3570167663E+03 -0.2750880378E+03 -0.123252664E+03 0.1274801263E+02 0.2161400544E+03 0.5214638855E+02 -0.1145969595E+02 -0.5093109967E+01 -0.1978309015E+01 -0.7279126061E+00 -0.2626848047E+00 -0.9492302474E-01 -0.3487802780E-01 -0.1318911625E-01 -0.5173777258E-02 -0.2110455821E-02 -0.8895344994E-03 -0.38317681307E-03 -0.1625464718E-03 -0.7101251936E-04 -0.2897385208E-04 -0.2473624662E-04 -0.1674211965E-05 0.3187210974E-06 0.5005103498E-06 0.1523254959E-05 0.5279535803E-06 0.8024829993E-07 0.2021828951E-06 0.9716371438E-06 0.2968040782E-06 -0.3495900938E-06 -0.1954768338E-06 0.1504466356E-07 0.1314833600E-06 0.4668649055E-07 -0.1731456170E-06 -0.4184743616E-06 -0.5797611424E-06 -0.5763179609E-06 -0.3495929203E-06 -0.2429499664E-06 -0.4015518497E-07 0.1135952069E-06 0.2129117368E-06 0.2640400412E-06 0.2732527563E-06 0.2467141586E-06 0.1907519644E-06 0.1115837300E-06 0.1545545185E-07 -0.9133623264E-07 -0.2022906813E-06 -0.3108562509E-06 -0.4104812981E-06 -0.4946141798E-06 -0.5567032525E-06 -0.5901968731E-06 -0.5885433983E-06 -0.5475113469E-06 -0.4721498857E-06 -0.3698283437E-06 -0.2479160497E-06 0.1173823327E-06 0.2520347834E-06 0.1616720546E-06 0.2882540761E-06 0.3989701601E-06 0.4934008701E-06 0.5725167068E-06 0.6372881797E-06 0.6886857985E-06 0.7276800729E-06 0.7552415126E-06 0.7723460270E-06 0.7799479260E-06 0.7790339191E-06 0.7705691160E-06 0.7555240263E-06 0.7348691597E-06 0.7095750257E-06 0.6806121342E-06 0.6489509946E-06 0.6155621166E-06 0.5814160099E-06 0.5474831841E-06 0.5147341489E-06 0.4839677856E-06 0.4552964625E-06 0.4286609195E-06 0.4040018968E-06 0.3812601342E-06 0.3603763718E-06 0.3401913454E-06 0.3239458074E-06 0.3082084854E-06 0.2942361235E-06 0.2817534618E-06 0.2707732401E-06 0.2612361986E-06 0.2530830772E-06 0.2462546159E-06 0.234915546E-06 0.2363346335E-06 0.2331245924E-06 0.2310021714E-06 0.2299081104E-06 0.2297869692E-06 0.2305985869E-06 0.2323066221E-06 0.2348747336E-06 0.2382665802E-06 0.2424458205E-06 0.2473761134E-06 0.2530211175E-06 0.2593444917E-06 0.2663098947E-06 0.2738809852E-06 0.2820214219E-06 0.2906948637E-06 0.2998649693E-06 0.3094953974E-06 0.3195498068E-06 0.3299918562E-06 0.3407852043E-06 0.3518935100E-06 0.3632804319E-06 0.3749096289E-06 0.3867447596E-06 0.3987494828E-06 0.4108874573E-06 0.4231223418E-06 0.4354177950E-06 0.4477374757E-06 0.4600450427E-06 0.4723041547E-06 0.4844784704E-06 0.4965316486E-06 0.5084273481E-06 0.5201292276E-06 0.5316009458E-06 0.5428061614E-06 0.5537085333E-06 0.5642717202E-06 0.5744593809E-06 0.5842351740E-06 0.5935627583E-06 15 2 0.2919005059E+02 -0.2148201402E+02 0.7699093238E+02 0.8932029792E+02 -0.8632065295E+02 -0.2335319855E+03 -0.2266795233E+03 -0.1202262022E+02 0.7432134321E+01 0.6972279831E+01 0.2838847178E+01 0.1044280416E+01 0.3736933681E+00 0.1347353686E+00 0.4307623960E-01 0.1219832706E-01 0.2638179104E-02 0.7285238844E-04 -0.3868535284E-03 -0.3281876821E-03 -0.2020310856E-03 -0.111276

15 4

0.6296245029E+02 0.2049361184E+03 0.1440864337E+03 -0.2449043951E+03 -0.2230432242E+03 -0.8179918534E+01 -0.5977162876E+03 -0.6957040900E+01  
0.6950371722E+02 0.2378503209E+02 0.8705634652E+01 0.3368438835E+01 0.117606389E+01 0.4092916156E+00 0.1251061266E+00 0.3431634713E-01 0.6329629298E-02 -  
0.6527082584E-03 -0.1614281615E-02 -0.1204679281E-02 -0.7104259024E-03 -0.336465577E-03 -0.1941133300E-03 -0.9361165078E-04 -0.4415539586E-04 -0.1896515215E-04 -  
0.9227714644E-05 -0.3304811160E-05 -0.2677124749E-05 0.204904311E-05 -0.3475003213E-05 -0.4233863713E-05 -0.1576983998E-05 0.8389945468E-06 0.1284342826E-05  
0.6785723997E-06 0.3020445518E-06 0.2292787904E-06 0.2333341803E-06 0.8726978631E-07 -0.3686886948E-06 -0.1025649038E-05 -0.1707552388E-05 -0.2238339888E-05 -  
0.2474801340E-05 -0.2405121183E-05 -0.2050332517E-05 -0.1431468438E-05 -0.5795634961E-06 0.4343419627E-06 0.1529206142E-05 0.2623987244E-05 0.3637643474E-05  
0.4489133033E-05 0.5097414126E-05 0.5381444956E-05 0.5286093362E-05 0.4859865726E-05 0.4177178063E-05 0.3312446391E-05 0.2340086726E-05 0.1334515086E-05  
0.3701474879E-06 -0.4786000524E-06 -0.1152914941E-05 -0.1656398275E-05 -0.2008254577E-05 -0.2227688367E-05 -0.2333904166E-05 -0.2346106496E-05 -0.2283499878E-05 -  
0.2165288832E-05 -0.2007995570E-05 -0.1817413062E-05 -0.1596651967E-05 -0.1348822946E-05 -0.1077036659E-05 -0.7844037653E-06 -0.4740349249E-06 -0.1490407977E-06  
0.1874679562E-06 0.5323806769E-06 0.8825867046E-06 0.1234975379E-05 0.1586436041E-05 0.1933858030E-05 0.2274130686E-05 0.2604143350E-05 0.2920785361E-05  
0.3220946059E-05 0.3501514785E-05 0.3759380879E-05 0.3992121841E-05 0.4200067811E-05 0.4384237092E-05 0.4545647984E-05 0.4685318789E-05 0.4804267808E-05  
0.4903513342E-05 0.4984073693E-05 0.5046967161E-05 0.5093212048E-05 0.5123826655E-05 0.5139829284E-05 0.5142238235E-05 0.5132071810E-05 0.5110348310E-05  
0.5078086037E-05 0.5036303291E-05 0.4986018374E-05 0.4928249587E-05 0.4864015231E-05 0.4794197937E-05 0.4719137647E-05 0.4639038635E-05 0.4554105174E-05  
0.4464541535E-05 0.4370551991E-05 0.4272340815E-05 0.4170112279E-05 0.4064070656E-05 0.3954420218E-05 0.3841365238E-05 0.3725109988E-05 0.3605858741E-05  
0.3483815770E-05 0.3359185347E-05 0.3232171744E-05 0.3102979234E-05 0.2971812090E-05 0.2838874584E-05 0.2704370988E-05 0.2568505576E-05 0.2431482619E-05  
0.2293506391E-05 0.2154781163E-05 0.2015511208E-05 0.1875900799E-05 0.1736154209E-05 0.1596475709E-05 0.1457069573E-05 0.1318140073E-05 0.1179891481E-05  
0.1042528070E-05 0.9062541122E-06 0.7712738807E-06 0.6377916478E-06 0.5060116860E-06 0.3761382677E-06 0.2483756657E-06 0.1229281522E-06 0.7117198012E-23

15 6

-0.1109791992E+03 -0.6095965619E+03 0.3296875741E+03 0.6375099564E+03 -0.1482615678E+03 -0.1743174724E+03 -0.5400417735E+03 -0.3215667005E+02  
0.1196409961E+03 0.4857088920E+02 0.1738417669E+02 0.7341511202E+01 0.2765900421E+01 0.9330801540E+00 0.3046543226E+00 0.9401732347E-01 0.2421204035E-01  
0.3761188064E-02 -0.1011241433E-02 -0.1451274301E-02 -0.1004450231E-02 -0.5795375902E-03 -0.3163898530E-03 -0.1631551703E-03 -0.7523041317E-04 -0.3764217436E-04 -  
0.2593052710E-04 -0.6979250435E-05 -0.2707682729E-05 -0.9070689869E-06 0.1879550518E-06 -0.6428239482E-05 -0.7585249721E-05 -0.5477147597E-05 -0.5790840248E-05 -  
0.34934910139E-05 -0.1709243776E-05 0.4642731489E-05 0.1036670310E-04 0.1250835810E-04 0.9123615594E-05 0.2309314221E-05 -0.4824745320E-05 -0.8719882727E-05  
0.8506453622E-05 -0.4031797321E-05 0.2154060933E-05 0.7960895898E-05 0.1171655161E-04 0.1342114921E-04 0.1349287911E-04 0.1234993173E-04 0.10410949749E-04  
0.8092766811E-05 0.5814930104E-05 0.3995177788E-05 0.2950936842E-05 0.2596580480E-05 0.2745718481E-05 0.3211960618E-05 0.3808916670E-05 0.4350196411E-05  
0.4649409619E-05 0.4520166068E-05 0.3827840844E-05 0.2644870267E-05 0.1095455963E-05 -0.6962004403E-06 -0.2605897314E-05 -0.4509433031E-05 -0.6282605963E-05 -  
0.7801214484E-05 -0.8966326737E-05 -0.9878089962E-05 -0.1026992117E-04 -0.1038745558E-04 -0.1006999280E-04 -0.9538266044E-05 -0.8819692330E-05 -  
0.7941688665E-05 -0.6931672061E-05 -0.5817059528E-05 -0.4625268077E-05 -0.3383714721E-05 -0.2119816469E-05 -0.8609903328E-06 0.3653466759E-06 0.1531777546E-05  
0.2610885268E-05 0.3575252828E-05 0.4397463217E-05 0.5056481299E-05 0.5556799437E-05 0.5909291872E-05 0.6124832845E-05 0.6214296594E-05 0.6188557360E-05  
0.6058489382E-05 0.5834966900E-05 0.5528864155E-05 0.5151055387E-05 0.4712414834E-05 0.4232618737E-05 0.3696135336E-05 0.13040244871E-05 0.2567019582E-05  
0.1987333708E-05 0.14132061489E-05 0.8520771659E-06 0.3182549779E-06 0.1785308351E-06 -0.6295178477E-06 -0.1034390893E-05 0.1394946620E-05 -0.1712981677E-05  
0.1990292710E-05 -0.2228676369E-05 -0.2429929301E-05 -0.2595848154E-05 -0.2728229578E-05 -0.2828870218E-05 -0.2899566725E-05 -0.2942115745E-05 -0.2958313926E-05  
0.2949957918E-05 -0.2918844368E-05 -0.2866769923E-05 -0.2795531233E-05 -0.2706249444E-05 -0.2620747706E-05 -0.2484796166E-05 -0.2354866972E-05 -0.2214756773E-05  
0.2066262215E-05 -0.1911179949E-05 -0.1751306621E-05 -0.1588438879E-05 -0.124373372E-05 -0.1260906748E-05 -0.1099835654E-05 -0.9429567349E-06 -0.7920666515E-06  
0.6489620386E-06 -0.5154395487E-06 -0.3932958298E-06 -0.2843275300E-06 -0.1903312974E-06 -0.1131037800E-06 -0.5444162597E-07 -0.1614148328E-07 -0.4524491442E-20

15 8

0.2723135644E+03 0.1312090939E+04 -0.1584522151E+03 -0.1798639483E+04 0.1188039872E+04 0.3858157552E+03 -0.4050876575E+03 0.1462822738E+02  
0.1138587941E+01 0.1866655256E+01 -0.4789043276E-01 -0.2402540833E+01 -0.826895129E+00 -0.3942530819E+00 -0.1181103011E+00 -0.3686514953E-01 -0.1163250222E-01  
-0.3526733971E-02 -0.1017508334E-02 -0.2513224052E-03 -0.5704796384E-04 -0.5463643866E-05 -0.4339461098E-04 0.2562396903E-04 0.8464819929E-05 -0.2020988902E-04 -  
0.3551513444E-04 0.1275618491E-04 0.1294157438E-04 0.8453685157E-05 -0.7029484427E-05 -0.1367312745E-04 -0.4235195546E-05 0.6697581382E-05 0.5706398902E-05 -  
0.3373969840E-06 -0.1925154745E-05 0.7108488379E-06 0.4903104903E-05 0.7984104588E-05 0.7952188256E-05 0.5469093158E-05 0.1862405765E-05 -0.1540287448E-05 -  
0.3270229090E-05 -0.4423978096E-05 -0.4236922483E-05 -0.3124450266E-05 -0.1383262099E-05 0.7546908191E-06 0.3056144654E-05 0.5287835569E-05 0.7216499730E-05  
0.8608873300E-05 0.9931692446E-05 0.885169331E-05 0.7326598134E-05 0.4878073094E-05 0.1818770461E-05 -0.1538657512E-05 -0.4881558572E-05 -0.7872804700E-05  
0.1027317095E-04 -0.1169657776E-04 -0.1194112544E-04 -0.1112554562E-04 -0.9454846741E-05 -0.7134037225E-05 -0.4368125503E-05 -0.1362120003E-05 0.1678978048E-05  
0.4550138620E-05 0.7083757375E-05 0.9261731130E-05 0.1110334639E-04 0.1262788966E-04 0.1385464745E-04 0.1480290627E-04 0.1549195261E-04 0.1594107299E-04  
0.1619655391E-04 0.1619668188E-04 0.1604174341E-04 0.1572402499E-04 0.1526281315E-04 0.1467739437E-04 0.1398705517E-04 0.1321108206E-04 0.1236876154E-04  
0.147938011E-04 0.1056222429E-04 0.9636580577E-05 0.8718815800E-05 0.7813618707E-05 0.6922555835E-05 0.6047997518E-05 0.5191111560E-05 0.4353866395E-05  
0.3538030461E-05 0.2745372192E-05 0.1977660026E-05 0.1236662396E-05 0.5241477405E-06 -0.1581155062E-06 -0.8083589079E-06 -0.1424814029E-05 -0.2005712433E-05 -  
0.2549285684E-05 -0.3053765347E-05 -0.3517382986E-05 -0.3938370165E-05 -0.4314958448E-05 -0.4645962684E-05 -0.4932530864E-05 -0.5176394261E-05 -0.5379284152E-05 -  
0.5542931811E-05 -0.5669068512E-05 -0.5759425532E-05 -0.5815734144E-05 -0.5839725624E-05 -0.5833131247E-05 -0.5797682288E-05 -0.5735110021E-05 -0.5647145721E-05  
0.5535520664E-05 -0.5401966125E-05 -0.5248213378E-05 -0.5075993698E-05 -0.4887038360E-05 -0.4683078640E-05 -0.4465845812E-05 -0.4237071150E-05 -0.3998485931E-05  
0.3751821429E-05 -0.349880918E-05 -0.3241179675E-05 -0.2980664973E-05 -0.2718996088E-05 -0.2457904295E-05 -0.2199120868E-05 -0.1944377082E-05 -0.1695404213E-05  
0.1453933536E-05 -0.1221696325E-05 -0.1000423855E-05 -0.7918474015E-06 -0.597689319E-06 -0.4197076428E-06 -0.2596068876E-06 -0.119127483E-06 -0.3890123476E-21

15 10

-0.7653149117E+03 -0.1953186992E+03 0.2382637507E+04 -0.8987536643E+03 -0.2018149060E+04 0.7709652076E+03 0.1240996845E+04 -0.1870714318E+03 -  
0.2553573159E+03 -0.1006164997E+02 -0.4599984705E+02 -0.1954592911E+02 -0.8088004657E+01 -0.2806913277E+01 -0.8804020509E+00 -0.2604260830E+00 -0.6584506445E-  
-0.1028898765E-01 0.2557217923E-02 0.3717129803E-02 0.2575345619E-02 0.1468971053E-02 0.7070602007E-03 0.4209154113E-03 0.1863300397E-03 0.6998357986E-04  
0.6066767306E-04 0.7777938026E-05 0.9700592822E-05 0.2381229356E-04 0.2019397372E-04 0.9034881107E-05 0.3089430967E-05 -0.5165392143E-06 -0.6670690194E-05 -  
0.1247556780E-04 -0.1414909239E-04 -0.1209040056E-04 -0.7801141933E-05 -0.13650277237E-05 0.1779305491E-05 0.5281669694E-05 0.5442532542E-05 0.7958247644E-05  
0.6710776880E-04 0.44399651797E-05 0.1923403170E-05 0.1805617768E-06 0.1276850332E-06 0.8386923796E-06 0.2767245228E-06 0.3096372724E-05 0.8126487081E-05  
0.1087844051E-04 0.1322612523E-04 0.1483017344E-04 0.1544312429E-04 0.1591814461E-04 0.1426830817E-04 0.1290468873E-04 0.1130636005E-04 0.9685395904E-05  
0.8253870047E-05 0.7322856244E-05 0.6756706627E-05 0.6810886800E-05 0.7294810735E-05 0.8114212403E-05 0.9178845777E-05 0.1039578483E-04 0.1167277335E-04  
0.1291755585E-04 0.1405391113E-04 0.1506976018E-04 0.1596905916E-04 0.1675576424E-04 0.1743383160E-04 0.1800721739E-04 0.1847987781E-04 0.1885576900E-04  
0.1913884715E-04 0.193330842E-04 0.1944238898E-04 0.1947076501E-04 0.1942215267E-04 0.1930050814E-04 0.1910978757E-04 0.1885394715E-04 0.1853694304E-04  
0.1816273142E-04 0.1773526845E-04 0.1725851030E-04 0.1673648668E-04 0.1617352143E-04 0.1557401195E-04 0.1494235561E-04 0.1428294980E-04 0.1360019190E-04  
0.1289847930E-04 0.1218202938E-04 0.1145577952E-04 0.1072358711E-04 0.9990029533E-05 0.9259504170E-05 0.8536408406E-05 0.7825139626E-05 0.7130095212E-05  
0.6545672550E-05 0.5806269022E-05 0.5186282014E-05 0.4600108908E-05 0.4052147088E-05 0.3545794738E-05 0.3080453232E-05 0.2654524747E-05 0.2266411457E-05  
0.1914515537E-05 0.1597239162E-05 0.1312984506E-05 0.1060153744E-05 0.8371490522E-06 0.6423726042E-06 0.4742265753E-06 0.3311131402E-06 0.2114347439E-06  
0.1135927511E-06 0.599201468E-07 -0.2297116411E-07 -0.6488900690E-07 -0.9136120657E-07 -0.1039855885E-06 -0.1043599776E-06 -0.9408219313E-07 -0.7475007817E-07  
0.796143988E-07 -0.1531410941E-07 0.2159408811E-07 0.6116532753E-07 0.1018017837E-06 0.1419056315E-06 0.1798790458E-06 0.2142124014E-06 0.2430432732E-06  
0.2650384361E-06 0.2785118649E-06 0.2818657344E-06 0.2735022196E-06 0.2518234953E-06 0.2152317363E-06 0.1621291175E-06 0.9091781379E-07 -0.4079657135E-20

15 12

0.2876323321E+03 0.2331842524E+03 -0.2880897551E+03 0.3004997644E+03 -0.1250072420E+02 -0.3509470448E+03 -0.1765215000E+03 0.8910298853E+02  
0.8002677307E+02 0.4000423891E+02 0.1748829149E+02 0.7620348384E+01 0.3126842176E+01 0.1135169883E+01 0.3398173237E+00 0.1002192993E+00 0.2573877158E-01  
0.4372493328E-02 -0.6875055278E-03 -0.1231856814E-02 -0.8918893568E-03 -0.4470446701E-03 -0.2180614346E-03 -0.1611773279E-03 -0.7103146742E-04 -0.3569460252E-05 -  
0.1041087700E-04 -0.4158040111E-05 -0.3684189781E-05 0.1117369214E-04 -0.1012821199E-04 -0.8535417194E-05 -0.5514033859E-05 -0.4595682618E-05 0.1044075734E-05  
0.6995798375E-05 0.7664446349E-05 0.3946478162E-05 -0.1638773291E-05 -0.6571975127E-05 -0.8879619580E-05 -0.8771499371E-05 -0.7003232338E-05 -0.4330436319E-05 -  
0.1427269132E-05 0.1357951505E-05 0.3758367894E-05 0.5507122339E-05 0.6405626339E-05 0.6528368181E-05 0.6018105347E-05 0.5017595320E-05 0.3669595891E-05  
0.2116863614E-05 0.5021569003E-06 -0.1031767077E-05 -0.2359208049E-05 -0.3422694598E-05 -0.4181812520E-05 -0.4596147611E-05 -0.4625285668E-05 -0.4228812485E-05 -  
0.3366313860E-05 -0.1997375587E-05 -0.1086699915E-06 0.2204784491E-05 0.4820882896E-05 0.7617520259E-05 0.1047259162E-04 0.1326399200E-04 0.1586961646E-04  
0.1816736001E-04 0.2005997977E-04 0.2154968117E-04 0.2266353170E-04 0.2342859885E-04 0.2387195012E-04 0.2402065300E-04 0.2390177498E-04 0.2354238358E-04  
0.2296954627E-04 0.2221033056E-04 0.2129180394E-04 0.2024103390E-04 0.1908508794E-04 0.1785103357E-04 0.1656593826E-04 0.1525686952E-04 0.1395089484E-04  
0.1267508172E-04 0.1145469765E-04 0.1032221013E-04 0.9293801897E-05 0.8370916657E-05 0.7547713362E-05 0.6818

S24

0.7182123585E-05 0.1616165317E-04 -0.3761712982E-04 0.1692410589E-04 -0.2024915646E-04 0.2357502142E-04 0.1175392752E-04 -0.3437607346E-04 -0.4087797363E-04 -0.2055431055E-04 -0.1978225757E-05 0.9934268739E-05 0.1618144330E-04 0.1776156828E-04 0.1589728245E-04 0.1270869811E-04 0.1054029596E-04 0.1173655672E-04 0.1779050474E-04 0.2678933902E-04 0.3596880222E-04 0.4256463699E-04 0.4443769181E-04 0.4194923845E-04 0.3608565448E-04 0.2783331749E-04 0.1817865007E-04 0.1087894791E-05 0.192435751E-05 -0.9336008977E-05 -0.1494750578E-04 -0.1429584097E-04 -0.1966098785E-04 -0.1932291969E-04 -0.1756160979E-04 -0.1465031545E-04 -0.1088915795E-04 -0.6537962575E-05 -0.1856666338E-05 0.3008518910E-05 0.7938133600E-05 0.1281271817E-04 0.1751281304E-04 0.2191895866E-04 0.2591169544E-04 0.2937156384E-04 0.3220576520E-04 0.3442814463E-04 0.3607920815E-04 0.3719946177E-04 0.3782941153E-04 0.3800956346E-04 0.3778042356E-04 0.3718249788E-04 0.362562943E-04 0.3504231323E-04 0.3358106632E-04 0.3191305771E-04 0.3007879343E-04 0.2811877951E-04 0.2607352196E-04 0.2398352682E-04 0.2188930011E-04 0.1983134784E-04 0.1785017605E-04 0.1598629077E-04 0.1427220285E-04 0.1270844257E-04 0.1128754503E-04 0.1000204535E-04 0.8844478635E-05 0.7807379994E-05 0.6883284538E-05 0.6064727378E-05 0.5344243624E-05 0.4714368386E-05 0.4167636775E-05 0.3696583901E-05 0.3293744873E-05 0.2951654802E-05 0.2662848799E-05 0.2419861973E-05 0.2215229434E-05 0.2041486294E-05 0.1891167661E-05 0.1756808647E-05 0.1632135418E-05 0.1515638365E-05 0.1406998936E-05 0.1305898578E-05 0.1212018740E-05 0.1125040869E-05 0.1044646412E-05 0.9705168173E-06 0.9023335272E-06 0.8397780059E-06 0.7825316843E-06 0.7302760157E-06 0.6826924479E-06 0.6394624284E-06 0.6002674049E-06 0.5647888252E-06 0.5327081369E-06 0.5037067877E-06 0.4774662253E-06 0.4536678973E-06 0.4319932515E-06 0.4121237354E-06 0.3937407969E-06 0.3765258835E-06 0.3601604430E-06 0.3443259230E-06 0.3287037121E-06 0.3129754353E-06 0.2968223630E-06 0.2799260020E-06 0.2619677998E-06 0.2426292043E-06 0.2215916631E-06 0.1985366239E-06 0.1731455343E-06 0.1450998220E-06 0.1140809948E-06 0.7977044027E-07 0.4184962611E-07 0.7517046451E-19 16 12 -0.9406505758E+02 0.4054977162E+03 -0.6507439160E+03 0.7150999391E+03 0.9237849528E+02 -0.3748774140E+03 -0.2083421759E+03 0.7489726025E+02 0.8348436288E+02 0.3860809894E+02 0.1859839890E+02 0.9622986444E+01 0.4060621232E+01 0.1453982678E+01 0.4193936318E+00 0.1245361935E+00 0.3364003341E-01 0.7035252211E-02 0.2887620769E-03 -0.8628250097E-03 -0.6970311668E-03 -0.3543360427E-03 -0.2493107459E-03 -0.1348180609E-03 -0.7848368305E-04 -0.1990502996E-04 -0.3134546765E-04 -0.2662444708E-04 -0.1826094672E-04 -0.2523545410E-05 0.1410470726E-04 -0.1280782995E-04 -0.6733324933E-05 0.1472678901E-04 0.1210144167E-04 -0.3544221402E-05 -0.1284599723E-04 -0.1377967267E-04 -0.8656031184E-05 0.2141436267E-06 0.1058507634E-04 0.2047102425E-04 0.2795125286E-04 0.3110502765E-04 0.2869629025E-04 0.2222768682E-04 0.1388653966E-04 0.5860171083E-05 -0.8370343897E-07 -0.3855795735E-05 -0.5786424464E-05 -0.6205908281E-05 -0.5444565844E-05 -0.3832715810E-05 -0.1700676836E-05 0.6212324205E-06 0.2842909936E-05 0.4835120217E-05 0.6508844405E-05 0.7775063639E-05 0.8544759060E-05 0.8728911808E-05 0.823503024E-05 0.6984513847E-05 0.4924393167E-05 0.2201460867E-05 -0.9944954206E-06 -0.4473688064E-05 -0.8046329432E-05 -0.1152261389E-04 -0.1471280781E-04 -0.1472706956E-04 -0.1951515515E-04 -0.2098490517E-04 -0.2188368588E-04 -0.2225886351E-04 -0.2215780430E-04 -0.2162787450E-04 -0.2071644035E-04 -0.1947086809E-04 0.179852396E-04 -0.161667421E-04 -0.1420298508E-04 -0.1209452280E-04 -0.988753634E-05 -0.7633043808E-05 -0.5374759568E-05 -0.3161267158E-05 -0.103993281E-05 0.9418772076E-06 0.2736796678E-05 0.4297459351E-05 0.5587319415E-05 0.6613112790E-05 0.7392395824E-05 0.7942724868E-05 0.8281656272E-05 0.8426746385E-05 0.8395551557E-05 0.8205628139E-05 0.7484532480E-05 0.7419820931E-05 0.6859049840E-05 0.6209775558E-05 0.5489554436E-05 0.4715942822E-05 0.3906497067E-05 0.3078773520E-05 0.2250328532E-05 0.1878718452E-05 0.6614996311E-06 0.677158192E-07 -0.7228992948E-06 -0.1315129448E-06 -0.1843068440E-05 -0.2309326696E-05 -0.2716498353E-05 -0.3067202432E-05 -0.3364040762E-05 -0.3609619924E-05 -0.3806546315E-05 -0.3957426334E-05 -0.4064866379E-05 -0.4131472848E-05 -0.4159852141E-05 -0.4152610654E-05 -0.4112354788E-05 -0.4041690940E-05 -0.3943225509E-05 -0.3819564893E-05 -0.3673315490E-05 -0.3507083700E-05 -0.3323475920E-05 -0.3125098454E-05 -0.2914557985E-05 -0.2694460627E-05 -0.2467412873E-05 -0.2236021122E-05 -0.2002891771E-05 -0.1770631221E-05 -0.1541845868E-05 -0.1319142111E-05 -0.1105126350E-05 -0.9024049810E-06 -0.7135844042E-06 -0.5412710173E-06 -0.388072190E-06 -0.2565914076E-06 -0.1494379816E-06 -0.6921733936E-06 -0.1853587935E-07 -0.6335088223E-19 16 14 0.1396521000E-05 0.6208806211E+03 -0.448750648E+03 -0.2743034586E+02 -0.6702267577E+02 0.1771146721E+02 0.2433320734E+02 -0.8428378848E+01 -0.315085363E+01 -0.5482508837E+01 -0.2397827882E+01 -0.1131982611E+01 -0.4520736643E+00 -0.1899611922E+00 -0.5058936382E-01 -0.1460392508E-01 -0.3840402758E-02 -0.7908055960E-02 -0.1136760767E-04 0.7772022050E-04 0.8417701945E-04 0.6087949755E-05 0.2598468348E-03 0.2975925292E-05 0.1529271483E-04 -0.1473958173E-04 -0.2767945312E-04 -0.4419626469E-05 -0.9122196243E-07 -0.2439343190E-06 -0.1187277218E-05 0.4535148227E-05 0.8951184527E-05 0.1029233873E-04 0.922387100E-05 0.6238489442E-05 0.1550026568E-05 -0.3500408283E-05 -0.7312400762E-05 -0.8285536521E-05 -0.5413747674E-05 -0.6835218017E-07 -0.5784985541E-05 0.1018060107E-04 0.116684231E-04 0.1068016645E-04 0.8302803025E-05 0.5489341544E-05 0.3067530717E-05 0.1142776005E-05 -0.3581179482E-06 0.1508346495E-05 -0.2381104989E-05 -0.3049588785E-05 -0.3586993235E-05 -0.4066513694E-05 -0.4545715453E-05 -0.5019643552E-05 -0.5467712969E-05 -0.5869338680E-05 -0.6203935665E-05 -0.6450918901E-05 0.6589730364E-05 -0.6599704034E-05 -0.6468566693E-05 -0.6216860349E-05 -0.5873384816E-05 -0.5466939908E-05 -0.5026325439E-05 -0.4580341222E-05 -0.4157787072E-05 -0.3787462801E-05 -0.3492326839E-05 -0.3271972075E-05 -0.3120150012E-05 -0.3030612156E-05 -0.2997110011E-05 -0.3013395079E-05 -0.3073218867E-05 -0.3170332878E-05 -0.3298488615E-05 -0.345143784E-05 -0.3622931288E-05 -0.3806721232E-05 -0.3996558920E-05 -0.4186195856E-05 -0.4369383544E-05 -0.4539873488E-05 -0.4691471193E-05 -0.4817766163E-05 -0.4912671901E-05 -0.4969885913E-05 -0.4984723900E-05 -0.4958758355E-05 -0.4895125968E-05 -0.4796963431E-05 -0.4664707435E-05 -0.450594670E-05 -0.4326661826E-05 -0.4121745596E-05 -0.3897982669E-05 -0.3658509736E-05 -0.3406463489E-05 -0.3144980617E-05 -0.2877197812E-05 -0.2606251765E-05 -0.2335279166E-05 -0.2067416706E-05 -0.1805801075E-05 -0.1553568966E-05 -0.1313857067E-05 -0.109802071E-05 -0.8839004264E-06 -0.6960876147E-06 -0.5256588765E-06 -0.3719094521E-06 -0.2341345817E-06 -0.1116295056E-06 -0.3689463985E-08 0.9039030278E-07 0.1713145545E-06 0.2397880508E-06 0.2965155516E-06 0.3422018164E-06 0.3775516052E-06 0.4032696775E-06 0.42006707932E-06 0.4286297120E-06 0.4296811936E-06 0.4239199977E-06 0.4120508842E-06 0.3947786126E-06 0.3782079428E-06 0.3468463645E-06 0.3175904474E-06 0.2857531413E-06 0.2520364759E-06 0.2171452110E-06 0.1817841062E-06 0.1466579213E-06 0.1124714161E-06 0.7929235027E-07 0.4973648355E-07 0.2259757569E-07 -0.7826135725E-09 -0.1969932451E-07 -0.3344779738E-07 -0.4132327245E-07 -0.4262098999E-07 -0.3663619025E-07 -0.2266411350E-07 0.1023116362E-19 16 16 -0.2254888579E+02 0.3210137395E+01 -0.2778648084E+02 0.8412727575E+02 -0.4730920035E+02 0.2192397474E+01 0.2400056440E+00 0.2318364060E+00 0.1453593109E+00 0.9123736145E-01 0.7759441741E-02 0.2817034193E-01 0.5416249472E-02 0.2746999216E-02 0.6974706300E-03 0.1938786993E-03 0.4752902701E-04 0.8834272914E-05 -0.2888113436E-05 -0.1719913918E-05 -0.1156154224E-05 0.4736444626E-05 0.1386752144E-04 -0.2663844983E-06 -0.3150154808E-05 -0.5353124793E-05 0.1024784595E-05 -0.1920448225E-06 0.5978259359E-06 0.8830720779E-06 0.3247245844E-06 0.7664344309E-06 0.7067985907E-06 0.3372399734E-07 -0.8010609978E-06 -0.2351085020E-05 -0.1292456713E-05 -0.7610797203E-06 -0.1354358926E-07 0.6945856156E-06 0.1160442837E-05 0.1391967045E-05 0.144978218E-05 0.1394576334E-05 0.1279699215E-05 -0.1131756055E-05 0.9687438909E-06 0.8097397603E-06 0.6697006248E-06 0.5481831425E-06 0.4408938958E-06 0.3435394670E-06 0.2518264383E-06 0.1614613920E-06 0.6815501038E-07 -0.3239842422E-07 -0.1421225602E-06 -0.2535275689E-06 -0.3567620521E-06 -0.4419746117E-06 -0.4993138497E-06 0.379838680E-06 -0.4909667685E-06 -0.4055776532E-06 -0.2571103440E-06 -0.5671704401E-07 0.1802493236E-06 0.4384358358E-06 0.7024895692E-06 0.9570576008E-06 0.1186787007E-05 0.1376324866E-05 0.1513568409E-05 0.1599415492E-05 0.1638014127E-05 0.1633512325E-05 0.1590058098E-05 0.1511799457E-05 0.122884414E-05 0.1267460980E-05 0.1109677167E-05 0.9336809870E-06 0.7436204503E-06 0.5436435690E-06 0.3378983457E-06 0.1350328187E-06 -0.7430502728E-07 -0.1740267171E-06 -0.4598056034E-06 -0.6327123104E-06 -0.7854192814E-06 -0.9513985049E-06 -0.1018946083E-05 -0.1096834569E-05 -0.1150820631E-05 -0.1182660936E-05 -0.1194112153E-05 -0.1186930947E-05 -0.1162873988E-05 -0.1123697943E-05 -0.1071159478E-05 -0.1007015262E-05 -0.9330219617E-06 -0.8509362450E-06 -0.7625147793E-06 -0.6695142322E-06 -0.5736912710E-06 -0.4768025634E-06 -0.3806047768E-06 -0.2868545787E-06 -0.1973086367E-06 -0.1137236182E-06 -0.3751517786E-07 0.3126508108E-07 0.3290656830E-07 0.1476986912E-06 0.1953086636E-06 0.2378924963E-06 0.2738729933E-06 0.3041617669E-06 0.3290482268E-06 0.3488217826E-06 0.3637718440E-06 0.974872707E-06 0.3803591223E-06 0.3825751584E-06 0.3811253389E-06 0.3762990732E-06 0.3683857712E-06 0.3577648424E-06 0.3444556965E-06 0.3290177431E-06 0.3116503920E-06 0.2926430528E-06 0.272881352E-06 0.258660488E-06 0.2286752033E-06 0.2060020084E-06 0.1831358737E-06 0.1603662089E-06 0.1379824236E-06 0.1162739275E-06 0.9553013036E-06 0.7604044173E-07 0.5809427513E-07 0.4198102876E-07 0.2799012375E-07 0.1641096594E-07 0.7532964998E-08 0.1645530583E-08 -0.9619276373E-09 -0.1454889266E-20 17 0 0.1107437168E+02 -0.8694700968E+02 -0.9857592986E+02 0.1546541170E+03 0.3708083442E+03 0.3523572692E+03 0.7281209669E+02 -0.5552163543E+03 -0.6406826642E+03 0.2730834783E+03 0.1433162587E+03 -0.5398493493E+01 -0.2925534981E+01 -0.1163112133E+01 -0.4163756886E+00 -0.1431265761E+00 -0.4863219057E-01 0.1665568150E-01 -0.5830220371E-02 -0.2109793911E-02 -0.7975305601E-03 -0.3147029493E-03 -0.1299834487E-03 -0.5490272851E-04 -0.2129256807E-04 -0.9780549916E-05 -0.3771394982E-05 -0.1405361823E-05 0.3694159241E-06 0.6664707867E-06 -0.3423529760E-06 0.1728416933E-06 0.5016017823E-06 0.4141257174E-06 0.3495532283E-06 0.3805961209E-06 0.4842784771E-06 0.6213014052E-06 0.7482852707E-06 0.8218504388E-06 0.8106856775E-06 0.7317533667E-06 0.6140842889E-06 0.4867092267E-06 0.3750011505E-06 0.2897017824E-06 0.2378950322E-06 0.2266648099E-06 0.2594984991E-06 0.3254973793E-06 0.4101662037E-06 0.4990097254E-06 0.5775326977E-06 0.6312398738E-06 0.6456360069E-06 0.6062258503E-06 0.5037889742E-06 0.3502042175E-06 0.1626252360E-06 -0.4179431450E-07 -0.2459007780E-06 -0.4325404987E-06 -0.5845598208E-06 -0.6848050882E-06 -0.7210162415E-06 -0.7005076056E-06 -0.6354871020E-06 -0.5381626520E-06 -0.4207421769E-06 -0.2954335981E-06 -0.174448369E-06 0.6998381454E-07 0.9845611230E-06 0.5990703764E-07 0.8757362560E-07 0.9349413600E-07 0.7999842977E-07 0.4941636779E-07 0.4077810986E-06 -0.5368737975E-07 -0.1215493435E-06 0.1971782194E-06 -0.2782441465E-06 -0.3624172639E-06 -0.447367107E-06 0.5037656260E-06 -0.6102811489E-06 -0.6835844186E-06 -0.7483455739E-06 0.8022347542E-06 -0.8429220985E-06 -0.8680777458E-06 -0.8759708758E-06 -0.8672668304E-06 -0.8432299919E-06 -0.8051247426E-06 -0.7542154650E-06 -0.6917665414E-06 0.6190423541E-06 -0.5373072855E-06 -0.4478257181E-06 -0.3518620341E-06 -0.2506806159E-06 -0.1455458459E-06 -0.3772210651E-07 0.7152622000E-07 0.1809347512E-06 0.2892391048E-06 0.3951748984E-06 0.4974777495E-06 0.5948832760E-06 0.6861270953E-06 0.7702019686E-06 0.8471292308E-06 0.9171873602E-06 0.9806548352E-06 0.1037810134E-05 0.1088931735E-05 0.1134298117E-05 0.1174187758E-05 0.1208879136E-05 0.1238650730E-05 0.1263781019E-05 0.1284548479E-05 0.1301231590E-05 0.1314108831E-05 0.1323458679E-05 0.1329559612E-05 0.1332690115E-05 0.1333128651E-05 0.1331153712E-05 0.1327043773E-05 0.1321077312E-05 0.1313532806E-05 0.1304688735E-05 0.1294823576E-05 0.1284215809E-05 0.1273143910E-05 0.1261886360E-05 0.1250721636E-05 0.1239928216E-05 0.1229784579E-05 0.1220569203E-05 0.1212560567E-05 0.1206037149E-0

0.3851235578E-05 -0.3750178256E-05 -0.3637140212E-05 -0.3513148365E-05 -0.3379229633E-05 -0.3236410936E-05 -0.3085719193E-05 -0.2928181323E-05 -0.2764824245E-05 -0.2596674878E-05 -0.2424760141E-05 -0.2250106954E-05 -0.2073742234E-05 -0.1896689290E-05 -0.1719985876E-05 -0.1544648076E-05 -0.1371706420E-05 -0.1202187828E-05 -0.1037119218E-05 -0.8775275100E-06 -0.7244396225E-06 -0.5788824749E-06 -0.4418829860E-06 -0.3144680751E-06 -0.1976646610E-06 -0.9249966299E-07 -0.4993982626E-07 4

0.1197583312E+02 0.2457209409E+03 0.2863501742E+03 -0.3032514003E+03 -0.1634933572E+03 0.2456889614E+03 -0.1086216927E+03 -0.2255417079E+02 0.7260850051E+01 0.3715722996E+01 0.3748256909E+00 0.2700782530E+00 0.6271193863E-01 0.2158906574E-01 0.4701058827E-02 0.143328173E-02 0.1408420289E-03 -0.1246157545E-03 -0.1305814014E-03 -0.8108326020E-04 -0.4000603308E-04 -0.2456858035E-04 -0.1769886906E-04 -0.6134705725E-05 -0.8174352623E-05 -0.1849181913E-05 -0.8792612594E-06 0.2958459357E-05 -0.1351042019E-05 0.6243721859E-06 -0.3773149815E-05 -0.3540559203E-05 -0.1102343560E-05 0.9351773841E-06 0.1810363656E-05 0.1891996538E-05 0.1732023330E-05 0.1484634152E-05 0.1204579827E-05 0.9466111789E-06 0.7521267730E-06 0.6091161369E-06 0.4922165388E-06 0.3760652473E-06 0.2464298290E-06 0.1335990435E-06 0.7899194882E-07 0.1240276028E-06 0.2965525903E-06 0.5701236039E-06 0.9047248631E-06 0.1260340587E-05 0.1596954996E-06 0.1874552310E-05 0.2053116746E-05 0.2092632526E-05 0.1964806178E-05 0.1688233467E-05 0.1293232465E-05 0.8101212489E-06 0.2692178908E-06 -0.2991595349E-06 -0.8646929543E-06 -0.1397064293E-05 -0.1870829201E-05 -0.2280038214E-05 -0.2623615593E-05 -0.2900485599E-05 -0.3109572491E-05 -0.3249800530E-05 -0.3320093976E-05 -0.3319377089E-05 -0.3247821100E-05 -0.3110585125E-05 -0.2914075251E-05 -0.2664697565E-05 -0.2368858154E-05 -0.2032963104E-05 -0.1663418503E-05 -0.1266630437E-05 -0.8490049939E-06 -0.4169482596E-06 0.2313367849E-07 0.4648347336E-06 0.9017488189E-06 0.1327469847E-05 0.1735591732E-05 0.2119708378E-05 0.2473413723E-05 0.2790301656E-05 0.3063966097E-05 0.3288009060E-05 0.3457676848E-05 0.3574971119E-05 0.3643537823E-05 0.3667031009E-05 0.3649140126E-05 0.3593413021E-05 0.3503609945E-05 0.3383347457E-05 0.3236285874E-05 0.3066072976E-05 0.2876364902E-05 0.2670815701E-05 0.2453079421E-05 0.2226810112E-05 0.1995661823E-05 0.1763288601E-05 0.1533344497E-05 0.1309483559E-05 0.1095359835E-05 0.8946273759E-06 0.7102246878E-06 0.5422281131E-06 0.3899984526E-06 0.2528965072E-06 0.1302830775E-06 0.2151896441E-07 -0.7403503136E-07 -0.1570181090E-06 -0.2280694678E-06 -0.2878283069E-06 -0.3369338256E-06 -0.3760252231E-06 -0.4075416986E-06 -0.4267224513E-06 -0.4396066805E-06 -0.4450335854E-06 -0.4436423653E-06 -0.4360722192E-06 -0.4229623466E-06 -0.4049519466E-06 -0.3826802184E-06 -0.3567863612E-06 -0.3279095743E-06 -0.2966890569E-06 -0.2637640083E-06 -0.2297736276E-06 -0.195357114E-06 -0.1611536670E-06 -0.1278024856E-06 -0.9594276897E-06 -0.6621371645E-07 -0.3925425725E-07 -0.1750440059E-07 0.3797464307E-08 0.1861186822E-07 0.2809961191E-07 0.3162149616E-07 0.2853832174E-07 0.1821088943E-07 -0.6414493752E-07 17 6

0.1368397571E+03 -0.3829699415E+03 -0.5803367363E+02 0.1995988763E+02 -0.1175514236E+03 0.1691928538E+03 0.1374103424E+03 -0.3256491778E+02 -0.7358689890E+01 0.9215800081E+00 -0.1701698467E+01 -0.3834201458E+00 -0.1696506808E+00 -0.8410968433E-01 -0.2726833838E-01 -0.6807227069E-02 -0.1492964456E-02 -0.1605084388E-03 0.9836174383E-04 0.1071015997E-04 0.7298497565E-04 0.3719809725E-04 0.9780091036E-05 0.3922358316E-05 0.4718787581E-05 0.1138997327E-04 -0.1476774596E-05 0.1201332910E-05 0.5074800876E-05 -0.7018737566E-06 0.4008970337E-05 -0.4487735931E-05 -0.5691907627E-05 -0.1637169824E-05 -0.1548974328E-05 -0.268211744E-05 -0.6643868879E-06 0.3461977339E-05 0.7289603528E-05 0.8413214266E-05 0.5229423123E-05 -0.6575923891E-06 -0.6841763775E-05 -0.1091702254E-04 -0.1113119762E-04 -0.83477707749E-05 -0.4083869068E-05 0.1430022634E-06 0.3110996731E-05 0.4779831392E-05 0.5404629948E-05 0.5240516097E-05 0.4542613540E-05 0.3566045978E-05 0.2565937110E-05 0.1797410637E-05 0.1456772535E-05 0.1505057888E-05 0.1844484056E-05 0.2377268400E-05 0.3005628280E-05 0.3631781056E-05 0.4157944089E-05 0.44863034739E-05 0.4534535319E-05 0.4354531953E-05 0.3968085718E-05 0.3433429693E-05 0.2799678952E-05 0.2115948575E-05 0.1431535637E-05 0.7950002161E-06 0.2468138190E-06 -0.2102003277E-06 -0.5822175675E-06 -0.842224240E-06 -0.1095998701E-05 -0.1250131281E-05 -0.1344004329E-05 -0.1383802187E-05 -0.1375709200E-05 -0.11325909710E-05 -0.1240588063E-05 -0.1125928599E-05 -0.9881156648E-06 -0.8333336022E-06 -0.6677667551E-06 -0.4975999671E-06 -0.3290160816E-06 -0.1682009423E-06 -0.2133839259E-07 0.1053872239E-06 0.2071094863E-06 0.2842336637E-06 0.3384829481E-06 0.3715805311E-06 0.3852496047E-06 0.3812133606E-06 0.3511949907E-06 0.3269176867E-06 0.2801046405E-06 0.2224790439E-06 0.1557640887E-06 0.8168296670E-07 0.1958869694E-08 -0.8168501048E-07 -0.1675254820E-07 -0.253839351E-06 -0.3389034320E-06 -0.4209945267E-06 -0.4983894456E-06 -0.569349968E-06 -0.6325360782E-06 -0.6878699460E-06 -0.7356719463E-06 -0.7762474250E-06 -0.8099017281E-06 -0.8369402017E-06 -0.8576681916E-06 -0.8723910439E-06 -0.8814141046E-06 -0.8850427195E-06 -0.8835822348E-06 -0.8773379964E-06 -0.8666153503E-06 -0.8517196424E-06 -0.8329562188E-06 -0.8106304253E-06 -0.7850476081E-06 -0.7565131131E-06 -0.7253322862E-06 -0.6918104735E-06 -0.6562530208E-06 -0.6189652743E-06 -0.580255799E-06 -0.5404202836E-06 -0.4997737313E-06 -0.4586182690E-06 -0.4172592427E-06 -0.3760019985E-06 -0.3351518822E-06 -0.2950142398E-06 -0.2558944175E-06 -0.2180977610E-06 -0.1819296164E-06 -0.1476953297E-06 -0.1157002469E-06 -0.8624971389E-07 -0.5964907672E-07 -0.3620368137E-07 -0.1621887380E-07 -0.1771456173E-20 18 8

-0.1008093672E+02 0.8853096507E+03 0.8147487771E+02 -0.1055049700E+04 -0.3202308624E+02 0.2637327350E+03 0.3005923005E+03 -0.1818075884E+01 -0.5080611627E+02 -0.1719247455E+02 -0.1006372517E+02 -0.4292076550E+01 -0.160296076E+01 -0.6121983984E+00 -0.1923353842E+00 -0.5858925098E+00 -0.1638223979E-01 -0.3720678831E-02 -0.3703004038E-03 0.2998137688E-03 0.2867412231E-03 0.1779433976E-03 0.6380171717E-04 0.6891585856E-04 0.2909321570E-04 0.2562184285E-05 -0.1664520859E-04 0.8796257672E-05 0.1113649563E-04 0.7375527601E-05 -0.5377098146E-05 -0.1043104516E-04 -0.2774439368E-05 0.5208459082E-05 0.2437328332E-05 -0.4234618593E-05 -0.5833551897E-05 -0.2836709585E-05 0.1915903386E-05 0.5584282061E-05 0.6052062032E-05 0.4097441085E-05 0.1222257552E-05 -0.1071650232E-05 -0.1648376104E-05 -0.8357425824E-06 0.6724956455E-06 0.2182583591E-05 0.3134082224E-05 0.3499809736E-05 0.3385900273E-05 0.2898487685E-05 0.2143705819E-05 -0.1727688524E-05 0.2565696465E-06 -0.6635169648E-06 -0.1444356517E-05 -0.2069410434E-05 -0.2540059195E-05 -0.2857683281E-05 -0.3023663170E-05 -0.3039373425E-05 -0.2906212276E-05 -0.2625542451E-05 -0.2204376248E-05 -0.1672223646E-05 -0.1064220528E-05 -0.4155027749E-06 0.2287937324E-06 0.8635331124E-06 0.1423579484E-05 0.1883796666E-05 0.2216688440E-05 0.2425311844E-05 0.2520363880E-05 0.2512541249E-05 0.2412540652E-05 0.2310587906E-05 0.1978792366E-05 0.1666438079E-05 0.1304692632E-05 0.904257258E-06 0.4758150618E-06 0.3007634123E-07 0.4222667345E-06 -0.8705174640E-06 -0.1303979146E-05 -0.1711955079E-05 -0.2083748562E-05 -0.2408662894E-05 -0.2676001373E-05 -0.2875067297E-05 -0.2997889058E-05 -0.3047395412E-05 -0.3029240208E-05 -0.2949077295E-05 -0.2812560522E-05 -0.2625347373E-05 -0.2393080789E-05 -0.2121425527E-05 -0.1816031800E-05 -0.1482553457E-05 -0.1126644346E-05 -0.7539583159E-06 -0.3701492159E-06 0.1912910551E-07 0.4082227994E-06 0.7914780171E-06 0.1163240910E-05 0.151875629E-05 0.1849674325E-05 0.2153037150E-05 0.2423447736E-05 0.2661029641E-05 0.2867061905E-05 0.304732568E-05 0.3189593668E-05 0.3308651246E-05 0.3401275341E-05 0.3468744992E-05 0.3513329329E-05 0.353337121E-05 0.3533017679E-05 0.3512659950E-05 0.337542976E-05 0.3416945795E-05 0.3344147447E-05 0.3256426971E-05 0.3155063407E-05 0.3041335795E-05 0.2916523174E-05 0.2781904583E-05 0.2638795062E-05 0.2488365651E-05 0.2323003388E-05 0.22170951314E-05 0.2006488468E-05 0.1839893890E-05 0.1672446618E-05 0.1505425693E-05 0.1340110154E-05 0.117779040E-05 0.10831971392E-05 0.8671862480E-06 0.7214826481E-06 0.5838796317E-06 0.4556562383E-06 0.3380915075E-06 0.2324644788E-06 0.1400541916E-06 0.6213968553E-07 -0.1734496119E-20 19 10

-0.2078258886E+03 -0.1426350623E+03 0.6528111374E+03 -0.7368038339E+02 -0.8564571931E+03 -0.1446387434E+02 0.5223814252E+03 -0.6366404414E+01 -0.6530448789E-02 -0.2331001240E+02 -0.1135561230E+02 -0.5067562579E+01 -0.2200730588E+01 -0.7426931386E+00 -0.2323549552E+00 -0.707933443E-01 -0.1967108364E-01 -0.4433426507E-02 -0.3844041134E-03 0.3675819461E-03 0.3396585358E-03 0.2160686513E-03 0.9395728922E-04 0.7275003971E-04 0.2310074218E-04 0.1591863451E-04 0.1931701738E-04 0.2317940122E-05 0.6213951935E-05 0.1831858789E-04 0.8510531358E-05 0.2088676237E-05 -0.1871068251E-05 -0.4412210403E-05 -0.3763273043E-05 -0.2682799941E-05 -0.9039724624E-06 -0.2659173974E-06 0.1223430894E-05 0.2795103636E-05 0.4575338248E-05 0.5954330459E-05 0.6372559996E-05 0.5306528557E-05 0.3483073653E-05 0.1665054764E-05 0.6656153706E-06 0.1100234985E-05 0.2793737263E-05 0.5373281898E-05 0.8466028581E-05 0.1169913700E-04 0.1469976686E-05 0.1709507784E-04 0.1851222963E-04 0.1868483170E-04 0.177229253E-04 0.1604047039E-04 0.1375522353E-04 0.1118241021E-04 0.8587888692E-05 0.6237517235E-05 0.4397154096E-05 0.3268695278E-05 0.2798187761E-05 0.2867716266E-05 0.3359365517E-05 0.4155220237E-05 0.5137365150E-05 0.6187884978E-05 0.7188864444E-05 0.8043739336E-05 0.8741349699E-05 0.9291886643E-05 0.9705541277E-05 0.9992504710E-05 0.1016296805E-04 0.1022712242E-04 0.1019515891E-04 0.1007726863E-04 0.9883642711E-05 0.9624472245E-05 0.930948346E-05 0.8950262123E-05 0.8555604687E-05 0.8136167146E-05 0.7702140610E-05 0.7263716189E-05 0.6831084993E-05 0.641448130E-05 0.6023966712E-05 0.5667831617E-05 0.5346072810E-05 0.5056700024E-05 0.4797722993E-05 0.4567151453E-05 0.4362995136E-05 0.4182367378E-05 0.4025967112E-05 0.3889114872E-05 0.3770716792E-05 0.3668720670E-05 0.3581322051E-05 0.3506344858E-05 0.3441860762E-05 0.3385879497E-05 0.3336410477E-05 0.3291464396E-05 0.3249050030E-05 0.3207177431E-05 0.3163856335E-05 0.3117449675E-05 0.3067733207E-05 0.3014835882E-05 0.2958886654E-05 0.2900014476E-05 0.2838348303E-05 0.2774017088E-05 0.2707149784E-05 0.2637875345E-05 0.256632726E-05 0.2492620878E-05 0.2416898757E-05 0.2339285316E-05 0.2259909508E-05 0.2178900287E-05 0.2096386607E-05 0.2012497421E-05 0.1927361684E-05 0.1841108348E-05 0.1753866367E-05 0.1665764696E-05 0.1576932287E-05 0.1487498094E-05 0.1397591071E-05 0.1307340172E-05 0.1216874350E-05 0.1126322559E-05 0.1035813753E-05 0.9454768849E-06 0.8554409085E-06 0.7658347777E-06 0.6767874460E-06 0.5884278671E-06 0.5008489947E-06 0.4142877823E-06 0.3286781838E-06 0.2444461526E-06 0.1614596425E-06 0.7993460706E-07 -0.5997239410E-20 20 12

-0.3778273639E+02 0.4912113978E+03 -0.6690787551E+03 0.1334601199E+03 0.20927272520E+03 -0.2341891135E+03 -0.1251996424E+03 0.4160075724E+02 0.4574150609E+02 0.2322380827E+02 0.1032951040E+02 0.4746612324E+01 0.1775261693E+01 0.7063960786E+00 0.2075229105E+00 0.6214601505E-01 0.1691635974E-01 0.3597819050E-02 0.1717568466E-03 -0.4037325779E-03 -0.3511218349E-03 -0.1972750177E-03 -0.2103317652E-04 -0.8545857195E-04 -0.3214987854E-04 0.2267768930E-04 0.8323238640E-05 -0.2063600260E-05 -0.3485351175E-05 0.1376137111E-04 -0.9732678724E-05 -0.1504915623E-04 0.6252110577E-05 0.2835918578E-05 0.5329152251E-05 0.3767815334E-05 0.2155610641E-05 0.9241488039E-06 -0.3879825897E-06 -0.2242159554E-05 -0.4859169649E-05 -0.7496645828E-05 -0.9171632592E-05 -0.8901138040E-05 -0.6064595409E-05 -0.1491138475E-05 0.3627673847E-05 0.8100282645E-05 0.1097719010E-04 0.1227714276E-04 0.1226094826E-04 0.1118941424E-04 0.9323348357E-05 0.692358237E-05 0.4250851525E-05 0.1566035861E-05 -0.9012909130E-06 -0.3046370157E-05 -0.4795653032E-05 -0.6075590697E-05 -0.6812634312E-05 -0.6933235037E-05 -0.6363844032E-05 -0.5030912456E-05 -0.2903569934E-05 -0.1216599480E-06 0.3123295557E-05 0.6675774634E-05 0.1032625534E-04 0.1390121572E-04 0.1721813384E-04 0.2009448775E-04 0.2238513054E-04 0.2409441539E-04 0.2526407055E-04 0.2593582425E-04 0.2615140471E-04 0.2595254017E-04 0.2538095858E-04 0.2447388899E-04 0.2328655882E-04 0.2184719657E-04 0.202003047E-04 0.1839278875E-04 0.1646119963E-04 0.1444899136E-04 0.1239789216E-04 0.1034963026E-04 0.834593895E-05 0.6428531292E-05 0.4639150683E-05 0.30

0.1078871826E-07 -0.7748874932E-07 0.1075388823E-06 0.5140770562E-06 0.1089984337E-05 0.1783119291E-05 0.2541340481E-05 0.3312506473E-05 0.4044475832E-05 0.4685107122E-05 0.5169251773E-05 0.5565892667E-05 0.5814655535E-05 0.5948246178E-05 0.5976100288E-05 0.5907653633E-05 0.5752341958E-05 0.5519601012E-05 0.5218866542E-05 0.5485974295E-05 0.4451160019E-05 0.4003059462E-05 0.3522408370E-05 0.3025542491E-05 0.2514997573E-05 0.2002509362E-05 0.1497513608E-05 0.1009446055E-05 0.0877142453E-06 0.1218385497E-06 0.2607790716E-06 0.0620470476E-06 0.8993448863E-06 0.1159811534E-05 0.1384079643E-05 0.1574408443E-05 0.1733057159E-05 0.1862285018E-05 0.1964351247E-05 0.2041515074E-05 0.2096035724E-05 0.2130172426E-05 0.2146184406E-05 0.2146330890E-05 0.2132871107E-05 0.2108064282E-05 0.2074169643E-05 0.2033446416E-05 0.1988153829E-05 0.1940551109E-05 0.1892521262E-05 0.1844442417E-05 0.1796316484E-05 0.1748145372E-05 0.1699930989E-05 0.1619251444E-05 0.1603380046E-05 0.1555047305E-05 0.1506678929E-05 0.1458276828E-05 0.1409842910E-05 0.1361379084E-05 0.1313788260E-05 0.1264369346E-05 0.1215827252E-05 0.1167262886E-05 0.1118678157E-05 0.1070074974E-05 0.1021455247E-05 0.9728208846E-06 0.9241737952E-06 0.8755158881E-06 0.8268490724E-06 0.7781752571E-06 0.729496351E-06 0.6808142634E-06 0.6321309030E-06 0.5834481790E-06 0.5347680004E-06 0.4860922760E-06 0.4374229150E-06 0.3887618263E-06 0.3401109189E-06 0.2914721018E-06 0.2428472841E-06 0.1942383746E-06 0.1456472825E-06 0.9707591670E-07 0.4852618620E-07 0.1819005125E-07 17 16 -0.6354389143E+02 0.8140332951E+02 -0.1108730633E+03 -0.3215041372E+00 0.2303596579E+02 -0.1097379451E+01 -0.6170694601E+00 0.1281573890E+00 0.4534861500E-01 0.5953514111E-01 -0.1359870316E-01 0.2596115900E-01 0.4505689216E-02 0.2452658115E-02 0.6535710693E-03 0.1850856843E-03 0.4483606923E-04 0.9002285381E-05 0.7073281262E-06 0.2646738510E-06 0.2680381643E-05 0.6093804085E-06 0.4279082748E-05 0.4470341115E-05 0.5619490683E-06 0.7173086416E-05 0.2342650012E-05 0.1883740843E-05 0.19196849807E-06 0.5645092553E-06 0.7961166301E-06 0.3152021923E-05 0.2842775600E-05 0.2023961125E-06 0.3469539189E-06 0.4490667725E-06 0.9177967584E-06 0.8463851847E-06 0.3869338409E-06 0.3084554840E-06 0.1081636821E-05 0.1750287483E-05 0.2126040606E-05 0.2020529322E-05 0.1327855091E-05 0.12719967760E-06 0.8406148313E-06 0.1703524345E-05 0.2080162808E-05 0.2013437295E-05 0.1616124914E-05 0.1001002772E-05 0.2808479774E-06 0.4315623628E-06 0.02123451141E-05 0.1382041249E-05 0.1425510438E-05 0.1195855892E-05 0.7660296534E-06 0.2089837654E-06 0.4023297296E-06 0.9949587892E-06 0.1495951371E-06 0.1832355432E-05 0.1949976563E-05 0.1869650894E-05 0.1630972188E-05 0.1273534206E-05 0.8369307120E-06 0.3607554683E-06 0.1153977622E-06 0.5519352169E-06 0.9167297353E-06 0.1207520567E-05 0.1429513563E-05 0.1587914576E-05 0.1687929458E-05 0.1734764059E-05 0.1733624323E-05 0.1689715829E-05 0.1608244701E-05 0.1494416700E-05 0.1353437678E-05 0.1190513487E-05 0.1010849977E-05 0.8196530021E-06 0.6221284125E-06 0.4234820604E-06 0.2289197975E-06 0.4364747561E-07 0.1271290536E-06 0.2782039384E-06 0.4054911129E-06 0.5093836544E-06 0.5913944265E-06 0.6530362922E-06 0.6958221150E-06 0.7212647582E-06 0.7308770851E-06 0.7261719589E-06 0.7086622430E-06 0.6798608007E-06 0.6412804952E-06 0.5944341900E-06 0.5408347483E-06 0.4819950334E-06 0.4194279086E-06 0.3546462373E-06 0.2891628827E-06 0.2244907081E-06 0.1621425769E-06 0.1036313524E-06 0.5018431781E-07 0.2886436869E-08 0.4146290686E-07 0.8006432974E-07 0.1141184482E-06 0.1438258785E-06 0.169387371E-06 0.1910031403E-06 0.2088742046E-06 0.2232010463E-06 0.2341842817E-06 0.2420245273E-06 0.2469239946E-07 0.2490785114E-06 0.2486934887E-06 0.2459679386E-06 0.2411024805E-06 0.2342977308E-06 0.2257543059E-06 0.2156728221E-06 0.2042538958E-06 0.1916981434E-06 0.1782061812E-06 0.1639786257E-06 0.1492160932E-06 0.1341192001E-06 0.1188885627E-06 0.1037247974E-06 0.8882852065E-07 0.7440034875E-07 0.606408981E-07 0.4775078508E-07 0.359306205E-07 0.2538103738E-07 0.1630263545E-07 0.8896036638E-08 0.336773131E-08 0.9928615098E-10 0.1286773807E-08 0.183066007E-21 18 0 -0.3968023930E+02 0.8040874315E+02 0.1408148028E+03 -0.9048390910E+02 -0.2872017788E+03 -0.1287407304E+03 0.1852432895E+03 0.1525279169E+03 -0.4434652051E-01 -0.7160561474E-02 0.4362662104E+02 0.1164086692E+02 0.4344792831E+01 0.1508399192E+01 0.5037610036E+00 0.1645057871E+00 0.5276285927E-01 0.1664106116E-01 0.5142648250E-02 0.1544042972E-02 0.4441219872E-03 0.1176519705E-03 0.2680039134E-04 0.2508570666E-05 0.2998941842E-05 0.1802812241E-05 0.1331504013E-05 0.115834439E-05 0.1184169870E-05 0.4299070038E-06 0.8310116565E-06 0.4436165813E-06 0.5939722695E-07 0.2770011859E-09 0.1499030544E-06 0.309622225E-06 0.3080878412E-06 0.1782215523E-06 0.3873588344E-08 0.1311058208E-06 0.1611927245E-06 0.9416828941E-07 0.4386003545E-07 0.2267848131E-06 0.4262935353E-06 0.6052534924E-06 0.7243269184E-06 0.7441760474E-06 0.6380296068E-06 0.4293822972E-06 0.1542953126E-06 0.1511710532E-06 0.4599259062E-06 0.7089917525E-06 0.899254980E-06 0.9555929490E-06 0.8836804569E-06 0.6956645556E-06 0.4253693242E-06 0.1066188420E-06 0.2267628117E-06 0.5409515577E-06 0.8021233167E-06 0.9726450094E-06 0.103907767E-05 0.1000977637E-05 0.8820848289E-06 0.7023385921E-06 0.4816761650E-06 0.2400347864E-06 0.2648304907E-08 0.2264358701E-06 0.4151139586E-06 0.5673617725E-06 0.6855818022E-06 0.7721765379E-06 0.8295484699E-06 0.860100886E-06 0.8662338843E-06 0.8503523473E-06 0.8148579679E-06 0.7621532364E-06 0.6946406431E-06 0.6147226783E-06 0.5248018324E-06 0.4722805956E-06 0.3245614583E-06 0.219409108E-06 0.1131394433E-06 0.9241546305E-08 0.9024429002E-07 0.1829155753E-06 0.2668591948E-06 0.3421195357E-06 0.4092303609E-06 0.4687254331E-06 0.5211385151E-06 0.5670033697E-06 0.6068537597E-06 0.6412234479E-06 0.6706461970E-06 0.6956557698E-06 0.7167859292E-06 0.7345704379E-06 0.7495430587E-06 0.7622375544E-06 0.7731876877E-06 0.7829272215E-06 0.7919899186E-06 0.8009995416E-06 0.8102198535E-06 0.8204546170E-06 0.8320495206E-06 0.8450479555E-06 0.8593952388E-06 0.8750366873E-06 0.8919176180E-06 0.9099833479E-06 0.9291791940E-06 0.9494504732E-06 0.9707425024E-06 0.9930005987E-06 0.1016170079E-05 0.1040196260E-05 0.1065024459E-05 0.1095999393E-05 0.1116868179E-05 0.114377334E-05 0.1171263774E-05 0.1199281817E-05 0.1227773780E-05 0.1256684980E-05 0.1285960733E-05 0.1315546356E-05 0.1345387167E-05 0.1375428483E-05 0.1405615620E-05 0.1435893895E-05 0.1466208626E-05 0.1496505129E-05 0.1526728722E-05 0.1556824720E-05 0.1586738442E-05 0.1616415204E-05 0.1645800323E-05 0.1674839116E-05 0.1703476901E-05 0.1731658993E-05 0.1759330710E-05 0.1786437369E-05 0.1812924287E-05 0.1838736781E-05 18 2 0.7306927046E+02 -0.7874531279E+02 -0.8088738795E+02 0.4359634362E+02 0.4822783470E+02 0.2003656742E+02 -0.4200078689E+02 -0.1210693945E+02 -0.691753497E+01 0.1940723844E-01 0.1866673378E+00 0.5081955825E-01 -0.1319340362E-01 -0.6045690623E-02 -0.2554949194E-02 0.7960918556E-03 0.2688963177E-03 0.8458097972E-04 0.2522286216E-04 0.6318305116E-05 0.1747258730E-05 0.3270288680E-06 0.1494061563E-06 0.4873177271E-06 0.1942194678E-06 0.6844285444E-06 0.8075596760E-06 0.1244064055E-06 0.2491645607E-07 0.1835742027E-06 0.8594454556E-07 0.3048083785E-06 0.3273679939E-07 0.4070279295E-06 0.1210058843E-06 0.4287459942E-06 0.7029532280E-06 0.6852192628E-06 0.4898670257E-06 0.2312194435E-06 0.3024411417E-08 0.1832703021E-06 0.3367919606E-06 0.4666678271E-06 0.5806583593E-06 0.6810567901E-06 0.7687895468E-06 0.8447830567E-06 0.9088202184E-06 0.9561098169E-06 0.9807171088E-06 0.9767073507E-06 0.9381457992E-06 0.8590977107E-06 0.7432623419E-06 0.5558029432E-06 0.3236136845E-06 0.5076027995E-07 0.2451306370E-06 0.5464324391E-06 0.8355184987E-06 0.1094762189E-05 0.1306536881E-05 0.1453215949E-05 0.1522621423E-05 0.1521489963E-05 0.1463806687E-05 0.1362117514E-05 0.1229327162E-05 0.1078341149E-05 0.9226047923E-06 0.7734034114E-06 0.642858691E-06 0.5313172897E-06 0.4372625424E-06 0.3591775364E-06 0.2955454210E-06 0.2448493456E-06 0.2055724594E-06 0.1761979116E-06 0.1552088516E-06 0.1410884286E-06 0.1323197919E-06 0.1273860908E-06 0.1247704746E-06 0.1229560926E-06 0.1204260940E-06 0.1156636281E-06 0.1071518442E-06 0.93735151E-07 0.7281291942E-07 0.4395207716E-07 0.5678384397E-08 0.4150565767E-07 0.9669367746E-07 0.1589793034E-06 0.2274561638E-06 0.3012178378E-06 0.3793581020E-06 0.4609704366E-06 0.5451485194E-06 0.6309859788E-06 0.7175764432E-06 0.8040135411E-06 0.8893909008E-06 0.9728021508E-06 0.1053340920E-05 0.1130108835E-05 0.1202175527E-05 0.1268658622E-05 0.1328643749E-05 0.138122438E-05 0.1425697619E-05 0.1462171641E-05 0.1490956265E-05 0.1512369115E-05 0.1526715869E-05 0.1534310172E-05 0.1535463673E-05 0.1530488025E-05 0.1519694879E-05 0.1503395887E-05 0.1481902702E-05 0.1455526973E-05 0.1425480354E-05 0.1389274495E-05 0.1350221049E-05 0.1307431666E-05 0.1261318000E-05 0.1212191700E-05 0.1160364420E-05 0.1106147810E-05 0.1049853523E-05 0.9917920394E-06 0.9327785216E-06 0.871621109E-06 0.8101326293E-06 0.7481274281E-06 0.6859090592E-06 0.6237972742E-06 0.5621010248E-06 0.5011319625E-06 0.4412017391E-06 0.3826220062E-06 0.3257044154E-06 0.2707606185E-06 0.2181022671E-06 0.1680410128E-06 0.1208885072E-06 0.7695640218E-07 0.3655634921E-07 0.1875471375E-20 18 4 -0.1232927161E+03 0.8310004123E+02 0.1174612044E+03 -0.3197616637E+02 -0.2779036020E+03 0.2027287089E+03 0.3652585517E+02 -0.1041153507E+02 -0.4268095804E-01 0.3135475150E+00 0.8674068512E+00 -0.2380117930E+00 -0.1089699250E+00 0.3917752068E-01 -0.1409170094E-01 -0.4224762586E-02 0.1265933548E-02 0.3450403619E-03 0.769258940E-04 0.5121191017E-05 0.7208391488E-05 0.7259377122E-05 0.7480395789E-05 0.2859925694E-05 0.7527387140E-06 0.5389113414E-05 0.8703100081E-06 0.1095187919E-04 0.2614306484E-05 0.2000266339E-07 0.2686437386E-06 0.5263788979E-06 0.2309844494E-06 0.1622851773E-06 0.8008984956E-06 0.2136562603E-06 0.2057806408E-05 0.2166380429E-05 0.1269394273E-05 0.2549882494E-06 0.5638725726E-06 0.1093893371E-05 0.1296696885E-05 0.1133903687E-05 0.603750189E-06 0.1492328977E-06 0.943823174E-06 0.1598861079E-05 0.197183347E-05 0.2074873224E-05 0.1958774960E-05 0.1674333163E-05 0.1272342352E-05 0.6839570470E-06 0.13188917660E-06 0.1309789718E-06 0.5041340497E-06 0.7943459616E-06 0.1004300604E-05 0.1136683872E-05 0.1194181662E-05 0.1179479871E-06 0.1095264395E-05 0.9442211290E-06 0.7309424532E-06 0.4676466768E-06 0.1684585926E-06 0.1524970071E-06 0.4810953295E-06 0.8032115823E-06 0.1104720973E-05 0.1371498708E-05 0.1592345382E-05 0.1767763128E-05 0.1901179466E-05 0.1996021916E-05 0.2055717998E-05 0.2083695230E-05 0.2083381134E-05 0.2058203228E-05 0.2011589033E-05 0.1946966068E-05 0.1867761852E-05 0.1777403907E-05 0.1679319750E-05 0.1576936902E-05 0.1473682884E-05 0.1372985213E-05 0.1278271411E-05 0.1192968996E-05 0.1120505489E-05 0.1064308410E-05 0.1026985750E-05 0.1007867389E-05 0.1005463681E-05 0.1018284978E-05 0.1044841633E-05 0.1083643999E-05 0.1133202428E-05 0.1192027273E-05 0.1258628887E-05 0.1331517623E-05 0.1409203833E-05 0.1490197870E-05 0.1573010087E-05 0.1656150836E-05 0.1738130470E-05 0.1817459343E-05 0.1892647806E-05 0.1962206213E-05 0.2024644916E-05 0.2078474268E-05 0.2122516014E-05 0.2156837475E-05 0.2181817362E-05 0.2197873488E-05 0.220527666E-05 0.2204494707E-05 0.2195895425E-05 0.2179848131E-05 0.2156731538E-05 0.2126924359E-05 0.2098085306E-05 0.2048753092E-05 0.2001146428E-05 0.1948364028E-05 0.1890784603E-05 0.1828786867E-05 0.1762749531E-05 0.1693051309E-05 0.1620070912E-05 0.1544187053E-05 0.1465778444E-05 0.1385223798E-05 0.1302901828E-05 0.1219191245E-05 0.1134470762E-05 0.1049119092E-05 0.9635149469E-06 0.8780370394E-06 0.7930640817E-06 0.7089747865E-06 0.62621478660E-06 0.5449620327E-06 0.4657959929E-06 0.3890284777E-06 0.3150381808E-06 0.2442038209E-06 0.1769041104E-06 0.1135177618E-06 0.5442348754E-07 0.2928736466E-20 18 6 0.6940964894E+02 -0.2926022970E+03 -0.1119858307E+03 0.3144770038E+03 -0.5315977848E+03 0.1734303997E+03 0.2832847146E+03 0.7199980484E+01 -0.1938576643E-02 0.3650080719E+01 -0.3097944695E+01 -0.1040746170E+01 -0.3874455031E+00 -0.1592582380E+00 -0.4605353801E-01 0.1463674605E-01 0.414642028E-02 0.2031186709E-02 0.1013733044E-03 0.6725633341E-04 0.6354868971E-04 0.4554342158E-04 0.3671803891E-04 0.1080283560E-04 0.735342202E-05 0.9119988528E-05 0.6012964562E-06 0.2651670278E-04 0.72380150

0.7934367326E+02 0.2925501128E+03 0.2720995284E+03 -0.1160714873E+03 -0.832296194E+03 0.1511950577E+03 0.4427524553E+03 0.2742555832E+02 -  
0.3770095487E+02 -0.1132537892E+02 -0.7253157976E+01 -0.3080030551E+01 -0.9032668345E+00 -0.3922475262E+00 -0.1271086295E+00 -0.4070121213E-01 -0.1194009412E-01  
-0.3005804555E-02 -0.5139559351E-03 0.4635942465E-04 0.1330152807E-03 0.9491503931E-04 0.1338453164E-03 -0.8447165849E-05 0.3727275966E-04 0.2136924783E-04  
0.1887856207E-04 0.2044153858E-04 0.6581567479E-05 -0.2896070606E-05 -0.4346205455E-05 0.8318411873E-05 0.1696921216E-05 0.1882666025E-04  
0.1665581209E-04 0.1313541144E-04 0.8755014927E-05 0.4031242513E-05 -0.5192858283E-06 -0.4453819713E-05 -0.7625087094E-05 -0.9959685513E-05 -0.1138421251E-04  
0.1186166473E-04 -0.1150063532E-04 -0.1044611651E-04 -0.8843100546E-05 -0.6835644433E-05 -0.4563984289E-05 -0.2167470941E-05 0.2145847425E-06 0.2442861904E-05  
0.3778039687E-05 0.588077233E-05 0.6811813684E-05 0.7069631900E-05 0.6704236683E-05 0.580352832E-05 0.4455329228E-05 0.2747514030E-05 0.7679440757E-06  
0.1395519191E-05 -0.3655014334E-05 -0.5929609297E-05 -0.8166089548E-05 -0.1031816994E-04 -0.1233956533E-04 -0.1418399056E-04 -0.1580516049E-04 -0.1715678998E-04  
0.1819259387E-04 -0.1887825361E-04 -0.1922731700E-04 -0.1926529843E-04 -0.1901771231E-04 -0.1851007303E-04 -0.1776789498E-04 -0.1681669256E-04 -0.1568190017E-04  
0.1438927129E-04 -0.1296408303E-04 -0.1143192707E-04 -0.9818318723E-05 -0.8148772372E-05 -0.6448802416E-05 -0.4743923250E-05 -0.3059649269E-05 -0.1421494868E-05  
0.1450255579E-06 0.1614397613E-05 0.2961106902E-05 0.4165120992E-05 0.5228335299E-05 0.6158127197E-05 0.6961874066E-05 0.7646953281E-05 0.8220742219E-05  
0.8690618258E-05 0.9063958773E-05 0.9348141142E-05 0.9550542742E-05 0.9678540949E-05 0.9739513141E-05 0.9740836693E-05 0.9689888984E-05 0.9594047390E-05  
0.9460689287E-05 0.9297192053E-05 0.9110933064E-05 0.8909289697E-05 0.8699639330E-05 0.8488133711E-05 0.8276022078E-05 0.8063328044E-05 0.7850075217E-05  
0.7636287211E-05 0.7421987635E-05 0.7207200100E-05 0.6991948217E-05 0.6776255598E-05 0.6560145853E-05 0.6343642592E-05 0.6126769427E-05 0.5909549970E-05  
0.5692007829E-05 0.5474166618E-05 0.5256049946E-05 0.5037681424E-05 0.4819084663E-05 0.4600283275E-05 0.4381300869E-05 0.4162161058E-05 0.3942887452E-05  
0.3723503661E-05 0.3504033297E-05 0.3284499971E-05 0.3064927293E-05 0.2845338874E-05 0.2625758326E-05 0.2406209259E-05 0.2168715284E-05 0.1967300012E-05  
0.174987054E-05 0.1528800021E-05 0.1309762524E-05 0.1090898173E-05 0.8722305797E-06 0.6537833549E-06 0.4355801094E-06 0.2176444541E-06 0.1953693422E-19  
18 10  
-0.9714720166E+02 -0.4576071158E+03 0.7705996539E+03 0.4753459388E+03 -0.9867411781E+03 -0.1397625026E+03 0.3892077892E+03 0.3128266609E+02 -  
0.2052819298E+02 -0.4650927540E+01 -0.3069570195E+01 -0.1226498872E+01 -0.6126290235E+00 -0.2106647166E+00 -0.7089562033E+00 -0.2262102969E-01 -0.6715316511E-02  
-0.1761807287E+02 -0.3623260209E-03 0.121432314E-04 0.7809285780E-04 0.1618253705E-04 0.7210947987E-04 0.3092694992E-04 0.3273077709E-04 0.3304140228E-04  
0.1664204271E-04 0.1003913940E-04 -0.2868164276E-04 0.1349877566E-04 -0.2177316285E-04 0.9616465715E-05 0.1062320813E-05 -0.1509813203E-04 -0.2338271148E-04  
0.1675524309E-04 -0.7295971128E-05 0.1382290772E-05 0.7783586613E-05 0.1041196040E-04 0.8482004779E-05 0.4050506919E-05 -0.1151973726E-06 -0.1247772287E-05  
0.2568181699E-05 0.9669118984E-05 0.1764655768E-04 0.2400641591E-04 0.2681434564E-04 0.2628933430E-04 0.2318870317E-04 0.1826977355E-04 0.1228986672E-04  
0.6006303962E-05 0.1764065170E-06 -0.4442504171E-05 -0.7265308796E-05 -0.8395695120E-05 -0.8109552783E-05 -0.6682771420E-05 -0.4391240670E-05 -0.1510850169E-05  
0.1682510444E-05 0.4912951533E-05 0.7947948303E-05 0.1072843534E-04 0.1323871206E-04 0.1546307790E-04 0.1738583229E-04 0.1899127464E-04 0.2026370439E-04  
0.2118742096E-04 0.217538832E-04 0.2198318862E-04 0.2190259355E-04 0.2153935478E-04 0.2092072902E-04 0.2007397294E-04 0.1902634324E-04 0.1780509660E-04  
0.1643748971E-04 0.1495077927E-04 0.133722195E-04 0.1172907444E-04 0.1004859344E-04 0.8358035634E-05 0.6684657704E-05 0.5055716341E-05 0.3498468233E-05  
0.2040170068E-05 0.7080785347E-06 -0.4705496802E-06 -0.1474798447E-05 -0.2309113868E-05 -0.2984282605E-05 -0.3511091320E-05 -0.3900326675E-05 -0.4162775331E-05  
0.4309223949E-05 -0.4350459191E-05 -0.4297267719E-05 -0.4160436194E-05 -0.3950751278E-05 -0.367899632E-05 -0.3355967918E-05 -0.2992442798E-05 -0.2599210932E-05  
0.2187058983E-05 -0.1766773612E-05 -0.1349141480E-05 -0.9449492500E-06 -0.5649835825E-06 -0.2180145296E-06 0.9525429487E-07 0.3761358869E-06 0.625943244E-06  
0.8458983572E-06 0.1037587227E-05 0.1202049849E-05 0.1340690217E-05 0.1458421328E-05 0.1545756179E-05 0.1614807764E-05 0.1663289080E-05 0.1692531322E-05  
0.1703792887E-05 0.1698441371E-05 0.1677771569E-05 0.1643096477E-05 0.1595729092E-05 0.1536982408E-05 0.1468169423E-05 0.1390603131E-05 0.1305596529E-05  
0.1214462614E-05 0.1118514379E-05 0.1019064823E-05 0.9174269394E-06 0.8149137256E-06 0.7128381771E-06 0.6125132898E-06 0.5152520569E-06 0.4223674825E-06  
0.3351725543E-06 0.2549802709E-06 0.1831036284E-06 0.1208556225E-06 0.6954924915E-07 0.3049750434E-07 0.5013383941E-08 -0.559011614E-08 -0.3475498065E-20  
18 12  
-0.2329290092E+03 0.1067540376E+03 0.2706452454E+03 -0.4845653183E+02 0.1436166130E+03 -0.1208509672E+03 -0.9148907865E+02 0.1742431008E+02  
0.3065181224E+02 0.1348621303E+02 0.7095656858E+01 0.4338090412E+01 0.1852960335E+01 0.6416034239E+00 0.1774156968E+00 0.526305806E-01 0.1471715876E-01  
0.3500341098E-02 0.5091806970E-03 0.1329536361E-03 -0.1419617906E-03 -0.4720699301E-04 0.4504367626E-05 -0.5666385124E-04 -0.3431874174E-04 -0.7953556243E-05  
0.1579874433E-04 -0.1577052275E-04 -0.1083782973E-04 -0.1101457339E-04 0.6078676130E-05 -0.2689182299E-05 -0.2956568709E-05 0.1498959944E-04 0.1210675965E-04  
0.1283178688E-04 0.5916690625E-05 -0.7849380997E-05 -0.5351671528E-05 0.7963586833E-06 0.9351863300E-05 0.1846832704E-04 0.25836646737E-04 0.2920370178E-04  
0.2704996969E-04 0.2078529836E-04 0.1255223699E-04 0.4493334778E-05 0.1363277932E-05 -0.5776146299E-05 -0.8132234349E-05 -0.9032506108E-05 -0.8751925602E-05  
0.7574456858E-05 0.5784063901E-05 -0.3664710758E-05 -0.1472835960E-05 0.6452239301E-06 0.2570657847E-05 0.4184654724E-05 0.5368403493E-05 0.6003093088E-05  
0.5969912442E-05 -0.5150050487E-05 0.3476656133E-05 0.1090718185E-05 -0.1814814574E-05 -0.5046993362E-05 -0.8412869397E-05 -0.1171949390E-05 -0.1477391808E-04  
0.1738319316E-04 -0.1939416234E-04 -0.2081283667E-04 -0.2168501920E-04 -0.2205651296E-04 -0.2197312101E-04 -0.2148064637E-04 -0.2062489209E-04 -0.1945166120E-04  
0.1800675675E-04 -0.1633598177E-04 -0.1448513931E-04 -0.1250003241E-04 -0.1042646409E-04 -0.8310237416E-05 -0.6197155410E-05 -0.4133021117E-05 -0.2163637576E-05  
0.3348078273E-06 0.1307665900E-05 0.2717978137E-05 0.3860939922E-05 0.4744805652E-05 0.5384442184E-05 0.5800716373E-05 0.6010495075E-05 0.6031654147E-05  
0.5882033445E-05 0.5579526824E-05 0.5141992140E-05 0.4587296250E-05 0.3933306009E-05 0.3197888274E-05 0.2398909900E-05 0.1554237744E-05 0.6817386617E-06  
0.2007204913E-06 0.1075272859E-05 -0.1924051585E-05 -0.2729189813E-05 -0.3472820687E-05 -0.4140551251E-05 -0.4731884137E-05 -0.5249795879E-05 -0.5697263011E-05  
0.6077262064E-05 -0.6392769572E-05 -0.664672067E-05 -0.6842216083E-05 -0.6982108152E-05 -0.7069414807E-05 -0.7107112582E-05 -0.7098178007E-05 -0.7045587618E-05  
0.6952317947E-05 -0.6821345525E-05 -0.6655646887E-05 -0.6458198565E-05 -0.6231977093E-05 -0.5979959002E-05 -0.5705120825E-05 -0.5410439097E-05 -0.5098890348E-05  
0.4773451114E-05 -0.4437097925E-05 -0.4092807315E-05 -0.3743555817E-05 -0.3392319964E-05 -0.3042076289E-05 -0.2695801324E-05 -0.2356471602E-05 -0.2027063657E-05  
0.1710554021E-05 -0.1409919226E-05 -0.1128135807E-05 -0.8681802949E-06 -0.6330292234E-06 -0.4256591254E-06 -0.2490465335E-06 -0.1061679808E-06 -0.6317419017E-19  
18 14  
0.8303668646E+02 -0.4386561650E+03 0.4965179739E+03 -0.2315817195E+03 0.4156058819E+02 0.1397574308E+02 0.1706565049E+02 -0.5223281156E+01 -  
0.6355292847E+01 -0.47071764281E-01 -0.2164437368E+01 -0.1007900966E+01 -0.4201556098E+00 -0.1760068969E+00 -0.4481014616E-01 -0.1281623195E-01 -0.3421327002E-02  
-0.7745329279E-03 -0.6717099567E-04 0.2106400925E-04 0.5168097274E-04 0.4253200911E-05 0.2469656279E-03 -0.7602482377E-07 0.1621532515E-04 -0.397323458E-04  
0.4881945452E-04 -0.236695667E-05 -0.4807667635E-05 0.1409620070E-05 0.6794024050E-05 0.6848181073E-05 0.1002115664E-04 0.1300232687E-04 0.1067115443E-04  
0.4298028240E-05 -0.3444378545E-05 -0.1066518191E-04 -0.1566894514E-04 -0.1676023149E-04 -0.1292396375E-04 -0.5866502599E-05 0.2025431764E-05 0.8365119154E-05  
0.1333774774E-04 0.1138437697E-04 0.9537825988E-05 0.6815032865E-05 0.4069762610E-05 0.1487206908E-05 -0.9145858886E-06 -0.3117567425E-05 -0.5103689349E-05  
0.6854903306E-05 -0.8353160943E-05 0.9580413907E-05 -0.1052594497E-04 -0.1120836140E-04 -0.1165360110E-04 -0.1188760397E-04 -0.1282636090E-04 -0.1182564878E-04  
0.1158156803E-05 -0.1123000303E-05 -0.1079564016E-04 -0.1029815776E-04 -0.9755982115E-05 -0.9187539549E-05 -0.8611256363E-05 -0.8045558867E-05 -0.7508873367E-05  
0.7019626171E-05 -0.6592407921E-05 -0.62264466599E-05 -0.5917214520E-05 -0.560064001E-05 -0.5450427357E-05 -0.5283716906E-05 -0.5155344963E-05 -0.5060723844E-05  
0.4995265866E-05 -0.4954383345E-05 -0.4933488596E-05 -0.4927993936E-05 -0.4933311681E-05 -0.4944854147E-05 -0.4958033651E-05 -0.4968262508E-05 -0.4970953035E-05  
0.4665175474E-05 -0.4593368361E-05 -0.4887917794E-05 -0.4815678684E-05 -0.4719565976E-05 -0.4601595099E-05 -0.4463781539E-05 -0.4308140745E-05 -0.4136688175E-05  
0.3951439286E-05 -0.3754409537E-05 -0.3547614385E-05 -0.3333069288E-05 -0.3112789704E-05 -0.2888791092E-05 -0.2663088908E-05 -0.2437698612E-05 -0.2214635660E-05  
0.1995915510E-05 -0.1783553621E-05 -0.1579565451E-05 -0.1385966457E-05 -0.1204772097E-05 -0.1037571794E-05 -0.8842508296E-06 -0.7442684505E-06 -0.6189390313E-06  
0.5021564339E-06 -0.3989452896E-06 -0.3069097167E-06 -0.2255094776E-06 -0.1542022712E-06 -0.9244489176E-07 -0.3970806984E-07 0.4526947968E-08 0.4089891511E-07  
0.698465806E-07 0.9194471125E-07 0.1077340471E-06 0.1177553462E-06 0.1225493619E-06 0.1226568476E-06 0.1186185568E-06 0.1109752431E-06 0.1002676597E-06  
0.6730656023E-07 0.9182269809E-07 0.5516682657E-07 0.3760969965E-07 0.1969270242E-07 0.1954691986E-08 -0.1506168166E-07 -0.3081629725E-07 -0.4476840133E-07  
0.5637724044E-07 -0.6510206112E-07 -0.7040210994E-07 -0.7173663342E-07 -0.6856488712E-07 -0.6034609058E-07 -0.4653951735E-07 -0.2660440497E-07 -0.7958024888E-21  
18 16  
-0.1586135876E+03 0.1073258376E+03 0.4390113751E+02 -0.9749100326E+02 0.4163398881E+02 -0.2564712062E+00 -0.1215983575E+01 0.2919237079E+00  
0.2205437588E+00 0.2603226898E+00 0.1881895391E-01 0.8813490532E-01 0.1592384364E-01 0.8837067612E-02 0.2119123313E-02 0.5785469859E-03 0.1451410812E-03  
0.2536727627E-04 -0.7285349063E-05 -0.3897572823E-05 -0.1435218358E-05 0.2164404459E-04 -0.8481935956E-04 0.1564020468E-04 -0.5896624018E-05 -0.2100494793E-04  
0.5837107748E-05 -0.3510778006E-05 0.4253744080E-06 0.2626553100E-05 0.2990777272E-06 0.1031547506E-05 0.5100990457E-06 0.1929137634E-06 -0.4996597241E-05  
0.6904884649E-05 -0.6264495925E-05 -0.3775321751E-05 -0.6596014668E-06 0.1860425592E-05 0.2871887252E-05 0.2699380003E-05 0.1976867497E-05 0.1338313390E-05  
0.1276335314E-05 0.1718166827E-05 0.2449695468E-05 0.3256808773E-05 0.3958209107E-05 0.4503858135E-05 0.4876532350E-05 0.5059008243E-05 0.5034062307E-05  
0.4784431032E-05 0.4293010913E-05 0.3542458439E-05 0.2534635163E-05 0.1347542876E-05 0.7822842945E-07 -0.1176261327E-05 -0.5210879542E-05 -0.3252579365E-05  
0.3880313946E-05 -0.4105036432E-05 -0.3861858489E-05 -0.3214525836E-05 -0.2258942708E-05 -0.1091013340E-05 0.1933580325E-06 0.1498267175E-05 0.2727809853E-05  
0.3786081831E-05 0.4596413097E-05 0.5159070531E-05 0.5493555237E-05 0.5619368318E-05 0.5556010876E-05 0.5322984015E-05 0.4939788837E-05 0.4425926447E-05  
0.3800897946E-05 0.3084204437E-05 0.2295347025E-05 0.1453826812E-05 0.5791449010E-06 0.3091976051E-06 -0.1191699603E-05 -0.2048859990E-05 -0.2861177662E-05  
0.3609151517E-05 -0.4273280451E-05 -0.4834063363E-05 -0.5276566594E-05 -0.5604126276E-05 -0.5824645987E-05 -0.5946029303E-05 -0.5976179802E-05 -0.5923001062E-05  
0.5794396660E-05 -0.5598270173E-05 -0.5342525180E-05 -0.5035065256E-05 -0.4683793980E-05 -0.4296614929E-05 -0.3881431680E-05 -0.3446147812E-05 -0.2998666900E-05  
0.2546892523E-05 -0.2098728259E-05 -0.1662077684E-05 -0.1244844376E-05 -0.8549319122E-06 -0.4987064547E-06 -0.17638450

0.1572275656E-06 0.1479318757E-06 0.1336641280E-06 0.1151253094E-06 0.9301640658E-07 0.6803840638E-07 0.4089229560E-07 0.1227906102E-07 -0.1710031055E-07 -  
0.4654483231E-07 -0.7535351747E-07 -0.1028253792E-06 -0.1282594308E-06 -0.1510886340E-06 -0.1712817450E-06 -0.1889414689E-06 -0.2041705104E-06 -0.2170715745E-06 -  
0.2277473660E-06 -0.2363005898E-06 -0.2428339509E-06 -0.2474501540E-06 -0.2502519041E-06 -0.2513419062E-06 -0.2508228649E-06 -0.2487974854E-06 -0.2453684724E-06 -  
0.2406385308E-06 -0.2347103655E-06 -0.2276866814E-06 -0.2196701834E-06 -0.2107635764E-06 -0.2010695652E-06 -0.1906908548E-06 -0.1797301500E-06 -0.1682901558E-06 -  
0.1564735770E-06 -0.1443831185E-06 -0.1321214851E-06 -0.1197913819E-06 -0.1074955135E-06 -0.9533658510E-07 -0.8341730138E-07 -0.7184036729E-07 -0.6070848771E-07 -  
0.5012436753E-07 -0.4019071164E-07 -0.3101022492E-07 -0.2268561227E-07 -0.1531957856E-07 -0.9014828686E-08 -0.3874067538E-08 -0.8865416109E-21

## Program evaluatePES

The evaluating program takes (R, phi, theta) as input in units of (Angstrom, degree, degree)

**Example:**

**./evalPES\_phcn-he.exe 3.25 90 80**

**Produces the following output**

**E\_tot\_ren= 3.250 0.00000000 -95.97197**

**where -95.97197 is potential value for (3.25, 90, 80) coordinates are expressed in cm-1 with respect to the limit of infinitely separated monomers (where potential is zero).**

```

module common
real(8),parameter:: b2a=0.529177249d0
real(8), parameter :: A2Bohr=1.0d0/0.529177249d0
real(8), parameter :: H2kcal = 627.510d0, kcal2cm = 349.7550883d0
real(8), parameter:: Pi=acos(-1.0d0)

real(8), parameter::mnoznic=1.00, delta=0.005
integer,parameter :: N_atom_in_sites(2)=[1,13]
real(8), parameter :: covr_He=0.62, covr_H=0.37, covr_C=0.77, covr_N=0.75
integer, parameter :: n_covr_pairs=13

real(8), parameter ::wek_covr_sum(n_covr_pairs)=mnoznic*covr_He+[ &
    covr_C,covr_C,covr_C,covr_C,covr_C,covr_C,&
    covr_H,covr_H,covr_H,covr_H,covr_H,&
    covr_C,covr_N]
real(8),parameter:: eps=1.0d-10
integer,parameter:: MAXIT=40
integer,parameter:: max_iter=15
real(8), parameter :: CONV_THRESH = 1.0d-26, ZERO=0.0d0
real(8),parameter:: E_MAX=10000.0d0
contains
real(8) function Toang_Toennies(n, delta, r)
integer, intent(in) :: n
real(8), intent(in) :: delta, r
real(8) :: term, suma
integer :: i
suma=1
term=1.0d0
do i = 1,n
    term=term*r*delta/i
    suma = suma + term
end do
Toang_Toennies = 1.0 - exp(-r*delta)*suma
end function Toang_Toennies
end module common

program EvalPES_z_FIT
use common
implicit none
character(20) :: arg(5)
integer::i,n_h2o,n_cs
real(8):: R, theta_deg, phi_deg
logical:: is_hole_fixing_needed
integer::j,k
real(8):: min_rij,val_rij
integer::pair_rij,pair_index

real(8) delta_R, R_plus,R_minus,F_plus,F_minus,R_0,R_tmp,F_tmp
real(8):: R1,R2,E1,E2,A,B
real(8) :: Energy_wek(4),E_tot,E_tot_renorm, E_els,E_exp,E_Cn,E_pol
R1=0.0d0

is_hole_fixing_needed=.false.

do i=1, 5
    call getarg(i,arg(i))
enddo
read(arg( 1),*) R      !ANGSTROM
read(arg( 2),*) phi_deg
read(arg( 3),*) theta_deg

call geometria(R,theta_deg, phi_deg,is_hole_fixing_needed,min_rij,val_rij,pair_rij)
if (is_hole_fixing_needed) then
    delta_R=(val_rij-min_rij)
    R_minus=R
    F_minus=min_rij-val_rij
    pair_index=pair_rij
    i=1
    do while ( (i <= MAXIT).and.(is_hole_fixing_needed))
        call geometria(R+i*delta_R,theta_deg, phi_deg,&
            is_hole_fixing_needed,min_rij,val_rij,pair_rij)
        write(*,*) i, " ", R+i*delta_R, " ", min_rij, " ", is_hole_fixing_needed
        if (min_rij < val_rij ) then
            R_minus=R+i*delta_R
            F_minus=min_rij-val_rij
        else
            R_plus=R+i*delta_R
            F_plus=min_rij-val_rij
        endif
    endwhile
end if

```

```

        if (pair_index /= pair_rij) then
            write(*,*) 'WARNING, change of the pair_index, from: ',pair_index, 'to: ',pair_rij
        endif
        i=i+1
    end do

    if (is_hole_fixing_needed) then
        open(41, file = 'Errors.log', action='write',position='append')
        write(41, '(A,F6.2,4F7.2)') 'Problem for: ', R, theta_deg, phi_deg
        write(41,*) "ERROR: Problem with R_minus or R_plus"
        close(41)
        E_tot=-123456789
        write(*, '(A,F8.3,F12.8,F22.5)') 'E_tot_ren= ',R,R1,E_tot

        stop
    endif

    write(*,*) 'R_0 szukane w przedziale <',R_minus,',',R_plus,'>', F_minus, F_plus
    R_0=R_plus; F_tmp=F_plus
    if (abs(R_plus-R_minus) >eps) then
        i=1;
        do while ((abs(R_plus-R_minus) > eps).and.(abs(F_tmp)>eps)).and.(i<MAXIT))
            R_tmp=(F_minus*R_plus-F_plus*R_minus)/(F_minus-F_plus)
            call geometria(R_tmp,theta_deg, phi_deg,&
                is_hole_fixing_needed,min_rij,val_rij,pair_rij)
            F_tmp=min_rij-val_rij
            if (F_tmp*F_minus > 0.0d0) then
                F_minus=F_tmp; R_minus=R_tmp
            else
                F_plus=F_tmp; R_plus=R_tmp
            endif
            write(*,*) 'SIECZ: ', i, 'R_tmp ',R_tmp, ' F_tmp ', F_tmp, abs(R_plus-R_minus),eps
            if (pair_index /= pair_rij) then
                write(*,*) 'WARNING, change of the pair_index in SIECZNA, from: ',pair_index, 'to: ',pair_rij
            endif
            R_0=R_tmp
            i=i+1
        enddo
    endif
    call geometria(R_0,theta_deg, phi_deg,&
        is_hole_fixing_needed,min_rij,val_rij,pair_rij)
    call evalPES('geo_eval.xyz', 'fit_inter.prm', Energy_wek)
    E1=sum(Energy_wek(:))
    call geometria(R_0+delta,theta_deg, phi_deg,&
        is_hole_fixing_needed,min_rij,val_rij,pair_rij)
    call evalPES('geo_eval.xyz', 'fit_inter.prm', Energy_wek)
    E2=sum(Energy_wek(:))
    R1=R_0; R2=R_0+delta
    B=log(E1/E2)/(R2-R1)
    A=E1/exp(-B*R1)
    E_tot=A*exp(-B*R)
    if (E2 >= E1) then
        open(41, file = 'Errors.log', action='write',position='append')
        write(41, '(A,F6.2,4F7.2)') 'Problem for: ', R,theta_deg, phi_deg
        write(41, '(A,F7.3,F10.2)') 'R ',R, E_tot
        write(41, '(A,F7.3,F10.2)') 'R1',R1, E1
        write(41, '(A,F7.3,F10.2)') 'R2',R2, E2
        close(41)
        E_tot=-123456789
        write(*, '(A,F8.3,F12.8,F22.5)') 'E_tot_ren= ',R,R1,E_tot

        stop
    endif
    else
        call evalPES('geo_eval.xyz', 'fit_inter.prm', Energy_wek)
        E_tot=sum(Energy_wek(:))
    endif
    if (E_tot > E_MAX/2.0d0 ) E_tot=E_MAX/2.0d0+E_MAX/Pi *datan (Pi*(E_tot/E_MAX-0.5d0))
    write(*, '(A,F8.3,F12.8,F22.5)') 'E_tot_ren= ',R,R1,E_tot

contains

    subroutine geometria(R,theta_deg,phi_deg, is_hole_fixing_needed,min_rij,val_rij,pair_rij)
    use common
    implicit none
    real(8),intent(in):: R,theta_deg, phi_deg
    logical,intent(inout):: is_hole_fixing_needed
    real(8),intent(inout):: min_rij,val_rij
    integer,intent(inout):: pair_rij

    integer :: i,n_mon_1,n_mon_2
    real(8) :: theta, phi
    type wspolrzedne
        character(10) :: label
        real(8):: coord(1:3)
    end type wspolrzedne
    type(wspolrzedne), allocatable:: mon_1_coord(:), mon_2_coord(:)

    real(8)::tmp, wek_r(n_covr_pairs)
    open(40,file='phcn-he.input.COM')
    read(40,*) n_mon_1
    read(40,*) n_mon_2
    allocate(mon_1_coord(n_mon_1), mon_2_coord(n_mon_2))
    do i=1,n_mon_1
        read(40,*) mon_1_coord(i)%label, mon_1_coord(i)%coord(:)
    enddo

    do i=1,n_mon_2
        read(40,*) mon_2_coord(i)%label, mon_2_coord(i)%coord(:)
    enddo
    close(40)
    theta=theta_deg*Pi/180.0
    phi=phi_deg*Pi/180.0

```

```

open(44, file = 'geo_eval.xyz')
write(44,*)n_mon_1+n_mon_2
write(44,*)
do i =1,n_mon_1
  mon_1_coord(i)%coord(1)=R*dsin(theta)*dcos(phi)
  mon_1_coord(i)%coord(2)=R*dsin(theta)*dsin(phi)
  mon_1_coord(i)%coord(3)=R*dcos(theta)
  write(44,'(A6, 3F18.12)') mon_1_coord(i)%label, mon_1_coord(i)%coord(:)
enddo

do i =1,n_mon_2
  mon_2_coord(i)%coord(:)=b2a*mon_2_coord(i)%coord(:)
  write(44,'(A6, 3F18.12)') mon_2_coord(i)%label, mon_2_coord(i)%coord(:)
enddo
close(44)
do i=1,N_atom_in_sites(1)
  do j=1,N_atom_in_sites(2)
    k=i+N_atom_in_sites(1)*(j-1)
    wek_r(k)=sqrt( &
      (mon_1_coord(i)%coord(1)-mon_2_coord(j)%coord(1))**2 &
      +(mon_1_coord(i)%coord(2)-mon_2_coord(j)%coord(2))**2 &
      +(mon_1_coord(i)%coord(3)-mon_2_coord(j)%coord(3))**2 )
    enddo
  enddo
  if ( wek_r(minloc((wek_r(:)-wek_covr_sum(:)),1)) < wek_covr_sum(minloc((wek_r(:)-wek_covr_sum(:)),1)) ) then
    is_hole_fixing_needed=.true.
  else
    is_hole_fixing_needed=.false.
  endif

  pair_rij=minloc((wek_r(:)-wek_covr_sum(:)),1)
  min_rij=wek_r(pair_rij)
  val_rij=wek_covr_sum(pair_rij)

end subroutine geometria

subroutine evalPES(geo_file, fit_file, interaction_Energy_components)
use common
character ( len = * ),intent(in) :: fit_file, geo_file
real(8),intent(out)::interaction_Energy_components(4)
integer::oPoly,nDisp, cStart
integer:: nsite(2),iter,i,j,k,l,m,imon1,imon2
integer, allocatable:: stype(:,:)
character(100) :: scratch_line
integer:: max_number_of_types
real(8),allocatable::site_type_charge(:),site_type_polarizability(:)
logical::inc_polarizability
integer::num_site_pairs
integer,allocatable:: pairs_index(:,:)
integer,allocatable:: site_1(:), site_2(:)
real(8),allocatable:: alpha(:),beta(:),delta_1(:),delta_p(:), delta_n(:,:), C(:,:),alpha_i(:,:),A12(:)
integer::n_sites
real(8),allocatable:: sites(:,:), r_ab(:,:)
real(8):: E_els,E_exp,E_vdw,E_pol,E_tot, P_ab

real(8):: r_ab_vec(3),r_ab_sca, dampFact, iterChange,diff(3), convergence
real(8), allocatable :: E(:,,:), T_ab(:,,:,:), mu(:,,:), mu_tmp(:,,:)
open(unit=101,file=trim(fit_file),status='old')

read(101,*) oPoly,nDisp, cStart
read(101,*) nsite(1), nsite(2)
allocate(stype(2,max(nsite(1), nsite(2))))
stype(:,:)=0
read(101,*)(stype(1,i),i=1,nsite(1))
read(101,*)(stype(2,i),i=1,nsite(2))
read(101,*) scratch_line
max_number_of_types=maxval(stype(:,:))
allocate(site_type_charge(max_number_of_types), site_type_polarizability(max_number_of_types))
do i=1,max_number_of_types
  read(101,*) site_type_charge(i),site_type_polarizability(i)
  if (abs(site_type_polarizability(i)) > 1.0d-5) inc_polarizability=.true.
enddo
read(101,*) num_site_pairs
allocate(al-
pha(num_site_pairs),beta(num_site_pairs),delta_1(num_site_pairs),delta_p(num_site_pairs),delta_n(nDisp,num_site_pairs),&
C(nDisp,num_site_pairs),alpha_i(oPoly,num_site_pairs),A12(num_site_pairs), site_1(num_site_pairs),site_2(num_site_pairs))
allocate(pairs_index(maxval(stype(:,:)), maxval(stype(:,:))))
do i=1,num_site_pairs
  read(101,*) site_1(i), site_2(i),beta(i),alpha(i), (alpha_i(j,i),j=1,oPoly), (C(j,i),j=1,nDisp),&
A12(i),delta_1(i),(delta_n(j,i),j=1,nDisp), delta_p(i)
  pairs_index(site_1(i), site_2(i))=i
  pairs_index(site_2(i), site_1(i))=pairs_index(site_1(i), site_2(i))
enddo
close(101)
open(unit=102,file=trim(geo_file),status='old')
read(102,*) n_sites
if (nsite(1)+nsite(2) /= n_sites) error stop "Incompatible numbers of sites"
allocate(sites(2,max(nsite(1), nsite(2)),1:3))
do i=1,nsite(1)
  read(102,*) scratch_line, (sites(1,i,j),j=1,3)
enddo
do i=1,nsite(2)
  read(102,*) scratch_line, (sites(2,i,j),j=1,3)
enddo
close(102)
allocate(r_ab(nsite(1),nsite(2)))
do i=1,nsite(1)
  do j=1,nsite(2)
    r_ab(i,j)=sqrt( sum( (sites(1,i,:)-sites(2,j,:))**2 ) )
  enddo
enddo
enddo

```

```

E_els=ZERO
E_exp=ZERO
E_vdW=ZERO
E_pol=ZERO
do i=1,nsite(1)
  do j=1,nsite(2)
    k=pairs_index(stype(1,i),stype(2,j))
    E_els=E_els+Toang_Toennies(1,delta_1(k),r_ab(i,j))*site_type_charge(stype(1,i))*site_type_charge(stype(2,j))/(r_ab(i,j)*A2Bohr)
    E_exp=E_exp+A12(k)/(r_ab(i,j)**12)
    if (beta(k) > 0) then
      P_ab=1.0d0
      do l=1,oPoly
        P_ab=P_ab+alpha_i(l,k)*r_ab(i,j)**l
      enddo
      E_exp=E_exp+P_ab*exp(alpha(k)-beta(k)*r_ab(i,j))
    endif
    do l=1,nDisp
      E_vdW=E_vdW-Toang_Toennies(cStart+2*(l-1),delta_n(l,k),r_ab(i,j))*C(l,k)/r_ab(i,j)**(cStart+2*(l-1))
    enddo
  enddo
enddo
allocate(E(2,max(nsite(1), nsite(2)),1:3), T_ab(2,max(nsite(1), nsite(2)),2,max(nsite(1), nsite(2)),3,3))
E=ZERO
do i=1,nsite(1)
  do j=1,nsite(2)
    r_ab_vec(:)=(sites(1,i,:)-sites(2,j,:))*A2Bohr
    r_ab_sca=norm2(r_ab_vec)
    k=pairs_index(stype(1,i),stype(2,j))
    dampFact = Toang_Toennies(1, delta_1(k)/A2Bohr, r_ab_sca)
    E(1,i,:)=E(1,i,:) + r_ab_vec(:)*dampFact/r_ab_sca**3 * site_type_charge(stype(2,j))
    E(2,j,:)=E(2,j,:) - r_ab_vec(:)*dampFact/r_ab_sca**3 * site_type_charge(stype(1,i))
    T_ab(1,i,2,j,:)=3.0d0* spread( r_ab_vec, DIM = 2, NCOPIES = 3 )*spread( r_ab_vec, DIM = 1, NCOPIES = 3 )/r_ab_sca**5
    do l=1,3
      T_ab(1,i,2,j,l,1)=T_ab(1,i,2,j,l,1)-l/r_ab_sca**3
    enddo
    T_ab(1,i,2,j,:)=Toang_Toennies(3, delta_p(k)/A2Bohr, r_ab_sca)* T_ab(1,i,2,j,:,:)
    T_ab(2,j,1,i,:)=T_ab(1,i,2,j,:,:)
  enddo
enddo
allocate (mu(2,max(nsite(1), nsite(2)),3), mu_tmp(2,max(nsite(1), nsite(2)),3))
mu=ZERO; mu_tmp=ZERO
do iter=1,max_iter
  convergence=ZERO
  do i=1,nsite(1)
    if (site_type_polarizability(stype(1,i)) > 1.0d-20) then
      mu_tmp(1,i,:)=E(1,i,:)
      do j=1,nsite(2)
        if (site_type_polarizability(stype(2,j)) > 1.0d-20) then
          mu_tmp(1,i,:)=mu_tmp(1,i,:)+matmul(T_ab(1,i,2,j,:,:), mu(2,j,:))
        endif
      enddo
      mu_tmp(1,i,:)=mu_tmp(1,i,:)*site_type_polarizability(stype(1,i))
      convergence=convergence+dot_product(mu(1,i,:),mu_tmp(1,i,:))
      mu(1,i,:)=mu_tmp(1,i,:)
    endif
  enddo
  do j=1,nsite(2)
    if (site_type_polarizability(stype(2,j)) > 1.0d-20) then
      mu_tmp(2,j,:)=E(2,j,:)
      do i=1,nsite(1)
        if (site_type_polarizability(stype(1,i)) > 1.0d-20) then
          mu_tmp(2,j,:)=mu_tmp(2,j,:)+matmul(T_ab(1,i,2,j,:,:), mu(1,i,:))
        endif
      enddo
      mu_tmp(2,j,:)=mu_tmp(2,j,:)*site_type_polarizability(stype(2,j))
      convergence=convergence+dot_product(mu(2,j,:),mu_tmp(2,j,:))
      mu(2,j,:)=mu_tmp(2,j,:)
    endif
  enddo
end do
E_pol = 0.0
do i = 1,2
  do j = 1,nsite(i)
    E_pol=E_pol - 0.5d0*dot_product(E(i,j,:), mu(i,j,:))
  enddo
enddo
E_tot=E_els*H2kcal+E_exp+E_vdW+E_pol*H2kcal
E_els=E_els*H2kcal*kcal2cm
E_exp=E_exp*kcal2cm
E_vdW=E_vdW*kcal2cm
E_pol=E_pol*H2kcal*kcal2cm
interaction_Energy_components=[E_els,E_exp,E_vdW,E_pol]
deallocate(stype)
deallocate(site_type_charge, site_type_polarizability)
deallocate(alpha,beta,delta_1,delta_p,delta_n,C,alpha_i,A12, site_1,site_2)
deallocate(pairs_index)
deallocate(sites)
deallocate(r_ab)
deallocate(E, T_ab)
deallocate(mu, mu_tmp)
end subroutine evalPES
end program EvalPES_z_FIT

```

Potential Energy Surface Routine for PhCN-He Ground State Potential  
 Method: autoPES with SAPT(DFT) with aug-cc-pVQZ Basis  
 FIT9\_F7s5X\_MCLC7\_19\_1493\_V0 based on 1493 ab initio points

```
# begin of grid
R [Angstrom] phi [degree] theta [degree] energy [cm-1]
100.00 0 0 -0.00000
50.00 0 0 -0.00000
40.00 0 0 -0.00001
30.00 0 0 -0.00006
25.00 0 0 -0.00019
20.00 0 0 -0.00080
18.00 0 0 -0.00163
16.00 0 0 -0.00374
14.00 0 0 -0.01036
13.00 0 0 -0.01937
12.00 0 0 -0.04112
11.00 0 0 -0.10290
10.50 0 0 -0.17313
10.00 0 0 -0.30114
9.75 0 0 -0.40096
9.50 0 0 -0.53638
9.25 0 0 -0.72011
9.00 0 0 -0.96931
8.75 0 0 -1.30728
8.50 0 0 -1.76604
8.25 0 0 -2.39025
8.00 0 0 -3.24338
7.75 0 0 -4.41703
7.50 0 0 -6.04342
7.25 0 0 -8.30692
7.00 0 0 -11.43608
6.75 0 0 -15.61641
6.50 0 0 -20.65429
6.25 0 0 -24.94782
6.00 0 0 -22.66597
5.75 0 0 3.45008
5.50 0 0 99.48087
5.25 0 0 380.41160
5.00 0 0 1118.53187
4.75 0 0 2931.14102
4.50 0 0 6911.09834
4.25 0 0 9182.15976
4.00 0 0 9719.58977
3.75 0 0 9891.57014
3.50 0 0 9956.13496
3.25 0 0 9981.93370
3.00 0 0 9992.50458
2.75 0 0 9996.88086
2.50 0 0 9998.70037
2.25 0 0 9999.45821
100.00 0 10 -0.00000
50.00 0 10 -0.00000
40.00 0 10 -0.00001
30.00 0 10 -0.00006
25.00 0 10 -0.00019
20.00 0 10 -0.00079
18.00 0 10 -0.00161
16.00 0 10 -0.00371
14.00 0 10 -0.01026
13.00 0 10 -0.01919
12.00 0 10 -0.04083
11.00 0 10 -0.10244
10.50 0 10 -0.17251
10.00 0 10 -0.30005
9.75 0 10 -0.39931
9.50 0 10 -0.53368
9.25 0 10 -0.71546
9.00 0 10 -0.96111
8.75 0 10 -1.29269
8.50 0 10 -1.74009
8.25 0 10 -2.34435
8.00 0 10 -3.16295
7.75 0 10 -4.27803
7.50 0 10 -5.80817
7.25 0 10 -7.92216
7.00 0 10 -10.84440
6.75 0 10 -14.81549
6.50 0 10 -19.90259
6.25 0 10 -25.38236
6.00 0 10 -28.01903
5.75 0 10 -17.67980
5.50 0 10 33.08812
5.25 0 10 192.36228
5.00 0 10 617.79467
4.75 0 10 1652.37551
4.50 0 10 3996.39863
4.25 0 10 7858.08773
4.00 0 10 9301.61432
3.75 0 10 9719.07694
3.50 0 10 9876.65253
3.25 0 10 9943.76673
3.00 0 10 9973.92834
2.75 0 10 9987.81842
2.50 0 10 9994.28783
2.25 0 10 9997.31694
100.00 0 20 -0.00000
50.00 0 20 -0.00000
40.00 0 20 -0.00001
30.00 0 20 -0.00006
25.00 0 20 -0.00018
20.00 0 20 -0.00076
18.00 0 20 -0.00156
```

16.00 0 20 -0.00360  
 14.00 0 20 -0.00997  
 13.00 0 20 -0.01869  
 12.00 0 20 -0.03998  
 11.00 0 20 -0.10105  
 10.50 0 20 -0.17061  
 10.00 0 20 -0.29694  
 9.75 0 20 -0.39489  
 9.50 0 20 -0.52694  
 9.25 0 20 -0.70457  
 9.00 0 20 -0.94285  
 8.75 0 20 -1.26146  
 8.50 0 20 -1.68622  
 8.25 0 20 -2.25136  
 8.00 0 20 -3.00315  
 7.75 0 20 -4.00588  
 7.50 0 20 -5.35159  
 7.25 0 20 -7.17498  
 7.00 0 20 -9.67352  
 6.75 0 20 -13.12567  
 6.50 0 20 -17.88062  
 6.25 0 20 -24.24128  
 6.00 0 20 -32.04240  
 5.75 0 20 -39.46617  
 5.50 0 20 -40.11299  
 5.25 0 20 -16.35065  
 5.00 0 20 74.83166  
 4.75 0 20 330.46881  
 4.50 0 20 958.13637  
 4.25 0 20 2388.68797  
 4.00 0 20 5509.02895  
 3.75 0 20 8677.37946  
 3.50 0 20 9533.26222  
 3.25 0 20 9805.99494  
 3.00 0 20 9913.77293  
 2.75 0 20 9960.64219  
 2.50 0 20 9981.81876  
 2.25 0 20 9991.55490  
 100.00 0 30 -0.00000  
 50.00 0 30 -0.00000  
 40.00 0 30 -0.00001  
 30.00 0 30 -0.00005  
 25.00 0 30 -0.00017  
 20.00 0 30 -0.00072  
 18.00 0 30 -0.00148  
 16.00 0 30 -0.00343  
 14.00 0 30 -0.00952  
 13.00 0 30 -0.01791  
 12.00 0 30 -0.03856  
 11.00 0 30 -0.09831  
 10.50 0 30 -0.16659  
 10.00 0 30 -0.29052  
 9.75 0 30 -0.38639  
 9.50 0 30 -0.51529  
 9.25 0 30 -0.68806  
 9.00 0 30 -0.91870  
 8.75 0 30 -1.22522  
 8.50 0 30 -1.63076  
 8.25 0 30 -2.16535  
 8.00 0 30 -2.86869  
 7.75 0 30 -3.79505  
 7.50 0 30 -5.02163  
 7.25 0 30 -6.66264  
 7.00 0 30 -8.89070  
 6.75 0 30 -11.96393  
 6.50 0 30 -16.24369  
 6.25 0 30 -22.15031  
 6.00 0 30 -29.90803  
 5.75 0 30 -38.70456  
 5.50 0 30 -44.38894  
 5.25 0 30 -33.75466  
 5.00 0 30 28.84645  
 4.75 0 30 231.90757  
 4.50 0 30 785.52330  
 4.25 0 30 2178.88287  
 4.00 0 30 5535.62629  
 3.75 0 30 8847.66437  
 3.50 0 30 9611.50476  
 3.25 0 30 9839.50411  
 3.00 0 30 9929.78637  
 2.75 0 30 9968.56881  
 2.50 0 30 9985.78598  
 2.25 0 30 9993.54258  
 100.00 0 40 -0.00000  
 50.00 0 40 -0.00000  
 40.00 0 40 -0.00001  
 30.00 0 40 -0.00005  
 25.00 0 40 -0.00015  
 20.00 0 40 -0.00067  
 18.00 0 40 -0.00138  
 16.00 0 40 -0.00320  
 14.00 0 40 -0.00893  
 13.00 0 40 -0.01684  
 12.00 0 40 -0.03640  
 11.00 0 40 -0.09328  
 10.50 0 40 -0.15843  
 10.00 0 40 -0.27676  
 9.75 0 40 -0.36829  
 9.50 0 40 -0.49132  
 9.25 0 40 -0.65615  
 9.00 0 40 -0.87607  
 8.75 0 40 -1.16821  
 8.50 0 40 -1.55462

8.25 0 40 -2.06411  
 8.00 0 40 -2.73520  
 7.75 0 40 -3.62130  
 7.50 0 40 -4.79954  
 7.25 0 40 -6.38490  
 7.00 0 40 -8.54901  
 6.75 0 40 -11.53451  
 6.50 0 40 -15.62729  
 6.25 0 40 -20.97208  
 6.00 0 40 -26.92369  
 5.75 0 40 -30.17792  
 5.50 0 40 -19.94731  
 5.25 0 40 33.58919  
 5.00 0 40 205.51867  
 4.75 0 40 674.38042  
 4.50 0 40 1855.05019  
 4.25 0 40 4736.96651  
 4.00 0 40 8625.99127  
 3.75 0 40 9607.57620  
 3.50 0 40 9863.67842  
 3.25 0 40 9949.29535  
 3.00 0 40 9980.66781  
 2.75 0 40 9992.56012  
 2.50 0 40 9997.12656  
 2.25 0 40 9998.88868  
 100.00 0 50 -0.00000  
 50.00 0 50 -0.00000  
 40.00 0 50 -0.00001  
 30.00 0 50 -0.00004  
 25.00 0 50 -0.00014  
 20.00 0 50 -0.00061  
 18.00 0 50 -0.00126  
 16.00 0 50 -0.00294  
 14.00 0 50 -0.00824  
 13.00 0 50 -0.01552  
 12.00 0 50 -0.03343  
 11.00 0 50 -0.08527  
 10.50 0 50 -0.14456  
 10.00 0 50 -0.25221  
 9.75 0 50 -0.33552  
 9.50 0 50 -0.44758  
 9.25 0 50 -0.59787  
 9.00 0 50 -0.79866  
 8.75 0 50 -1.06586  
 8.50 0 50 -1.42012  
 8.25 0 50 -1.88859  
 8.00 0 50 -2.50793  
 7.75 0 50 -3.32939  
 7.50 0 50 -4.42746  
 7.25 0 50 -5.91340  
 7.00 0 50 -7.95252  
 6.75 0 50 -10.77436  
 6.50 0 50 -14.63435  
 6.25 0 50 -19.60274  
 6.00 0 50 -24.85219  
 5.75 0 50 -26.64692  
 5.50 0 50 -13.23656  
 5.25 0 50 47.15027  
 5.00 0 50 232.95307  
 4.75 0 50 726.76237  
 4.50 0 50 1943.82168  
 4.25 0 50 4864.17446  
 4.00 0 50 8662.68994  
 3.75 0 50 9616.54113  
 3.50 0 50 9866.57022  
 3.25 0 50 9950.35834  
 3.00 0 50 9981.07771  
 2.75 0 50 9992.72101  
 2.50 0 50 9997.19011  
 2.25 0 50 9998.91384  
 100.00 0 60 -0.00000  
 50.00 0 60 -0.00000  
 40.00 0 60 -0.00001  
 30.00 0 60 -0.00004  
 25.00 0 60 -0.00012  
 20.00 0 60 -0.00054  
 18.00 0 60 -0.00113  
 16.00 0 60 -0.00267  
 14.00 0 60 -0.00747  
 13.00 0 60 -0.01400  
 12.00 0 60 -0.02980  
 11.00 0 60 -0.07478  
 10.50 0 60 -0.12579  
 10.00 0 60 -0.21813  
 9.75 0 60 -0.28954  
 9.50 0 60 -0.38564  
 9.25 0 60 -0.51461  
 9.00 0 60 -0.68715  
 8.75 0 60 -0.91710  
 8.50 0 60 -1.22238  
 8.25 0 60 -1.62645  
 8.00 0 60 -2.16051  
 7.75 0 60 -2.86734  
 7.50 0 60 -3.80773  
 7.25 0 60 -5.07093  
 7.00 0 60 -6.78956  
 6.75 0 60 -9.15519  
 6.50 0 60 -12.41585  
 6.25 0 60 -16.79598  
 6.00 0 60 -22.17855  
 5.75 0 60 -27.16256  
 5.50 0 60 -26.64256  
 5.25 0 60 -6.17849

5.00 0 60 70.08860  
4.75 0 60 283.72418  
4.50 0 60 808.96499  
4.25 0 60 2004.87979  
4.00 0 60 4609.20386  
3.75 0 60 8239.38005  
3.50 0 60 9399.41051  
3.25 0 60 9751.43800  
3.00 0 60 9889.06229  
2.75 0 60 9948.82984  
2.50 0 60 9976.04238  
2.25 0 60 9988.70505  
100.00 0 70 -0.00000  
50.00 0 70 -0.00000  
40.00 0 70 -0.00000  
30.00 0 70 -0.00003  
25.00 0 70 -0.00010  
20.00 0 70 -0.00048  
18.00 0 70 -0.00101  
16.00 0 70 -0.00239  
14.00 0 70 -0.00670  
13.00 0 70 -0.01245  
12.00 0 70 -0.02601  
11.00 0 70 -0.06346  
10.50 0 70 -0.10526  
10.00 0 70 -0.18040  
9.75 0 70 -0.23838  
9.50 0 70 -0.31637  
9.25 0 70 -0.42109  
9.00 0 70 -0.56136  
8.75 0 70 -0.74862  
8.50 0 70 -0.99766  
8.25 0 70 -1.32767  
8.00 0 70 -1.76368  
7.75 0 70 -2.33895  
7.50 0 70 -3.09891  
7.25 0 70 -4.10762  
7.00 0 70 -5.45817  
6.75 0 70 -7.28774  
6.50 0 70 -9.79510  
6.25 0 70 -13.24868  
6.00 0 70 -17.94754  
5.75 0 70 -24.03949  
5.50 0 70 -30.97937  
5.25 0 70 -36.18453  
5.00 0 70 -32.06316  
4.75 0 70 0.00840  
4.50 0 70 101.14870  
4.25 0 70 356.18637  
4.00 0 70 933.59802  
3.75 0 70 2163.52265  
3.50 0 70 4688.08091  
3.25 0 70 8110.23907  
3.00 0 70 9304.53609  
2.75 0 70 9679.31967  
2.50 0 70 9827.10406  
2.25 0 70 9901.81603  
100.00 0 80 -0.00000  
50.00 0 80 -0.00000  
40.00 0 80 -0.00000  
30.00 0 80 -0.00003  
25.00 0 80 -0.00009  
20.00 0 80 -0.00042  
18.00 0 80 -0.00090  
16.00 0 80 -0.00215  
14.00 0 80 -0.00602  
13.00 0 80 -0.01107  
12.00 0 80 -0.02259  
11.00 0 80 -0.05317  
10.50 0 80 -0.08650  
10.00 0 80 -0.14576  
9.75 0 80 -0.19127  
9.50 0 80 -0.25240  
9.25 0 80 -0.33452  
9.00 0 80 -0.44473  
8.75 0 80 -0.59230  
8.50 0 80 -0.78941  
8.25 0 80 -1.05189  
8.00 0 80 -1.40044  
7.75 0 80 -1.86235  
7.50 0 80 -2.47416  
7.25 0 80 -3.28594  
7.00 0 80 -4.36833  
6.75 0 80 -5.82366  
6.50 0 80 -7.80260  
6.25 0 80 -10.52644  
6.00 0 80 -14.30922  
5.75 0 80 -19.55852  
5.50 0 80 -26.69470  
5.25 0 80 -35.83793  
5.00 0 80 -45.90625  
4.75 0 80 -52.28770  
4.50 0 80 -41.07998  
4.25 0 80 25.10038  
4.00 0 80 242.52181  
3.75 0 80 855.32332  
3.50 0 80 2474.64285  
3.25 0 80 6466.25537  
3.00 0 80 9138.04260  
2.75 0 80 9695.79187  
2.50 0 80 9867.59688  
2.25 0 80 9939.58535  
100.00 0 90 -0.00000

50.00 0 90 -0.00000  
 40.00 0 90 -0.00000  
 30.00 0 90 -0.00002  
 25.00 0 90 -0.00008  
 20.00 0 90 -0.00039  
 18.00 0 90 -0.00083  
 16.00 0 90 -0.00199  
 14.00 0 90 -0.00552  
 13.00 0 90 -0.01004  
 12.00 0 90 -0.02000  
 11.00 0 90 -0.04522  
 10.50 0 90 -0.07188  
 10.00 0 90 -0.11852  
 9.75 0 90 -0.15406  
 9.50 0 90 -0.20169  
 9.25 0 90 -0.26563  
 9.00 0 90 -0.35158  
 8.75 0 90 -0.46714  
 8.50 0 90 -0.62243  
 8.25 0 90 -0.83095  
 8.00 0 90 -1.11072  
 7.75 0 90 -1.48596  
 7.50 0 90 -1.98957  
 7.25 0 90 -2.66695  
 7.00 0 90 -3.58186  
 6.75 0 90 -4.82543  
 6.50 0 90 -6.52887  
 6.25 0 90 -8.87939  
 6.00 0 90 -12.13239  
 5.75 0 90 -16.59647  
 5.50 0 90 -22.52180  
 5.25 0 90 -29.70674  
 5.00 0 90 -36.34572  
 4.75 0 90 -35.90486  
 4.50 0 90 -8.91128  
 4.25 0 90 98.49651  
 4.00 0 90 431.06866  
 3.75 0 90 1375.06345  
 3.50 0 90 3961.79686  
 3.25 0 90 8434.33813  
 3.00 0 90 9592.32638  
 2.75 0 90 9866.21480  
 2.50 0 90 9952.67716  
 2.25 0 90 9982.82360  
 100.00 0 100 -0.00000  
 50.00 0 100 -0.00000  
 40.00 0 100 -0.00000  
 30.00 0 100 -0.00002  
 25.00 0 100 -0.00008  
 20.00 0 100 -0.00039  
 18.00 0 100 -0.00082  
 16.00 0 100 -0.00194  
 14.00 0 100 -0.00533  
 13.00 0 100 -0.00956  
 12.00 0 100 -0.01857  
 11.00 0 100 -0.04027  
 10.50 0 100 -0.06242  
 10.00 0 100 -0.10033  
 9.75 0 100 -0.12890  
 9.50 0 100 -0.16697  
 9.25 0 100 -0.21794  
 9.00 0 100 -0.28644  
 8.75 0 100 -0.37876  
 8.50 0 100 -0.50348  
 8.25 0 100 -0.67234  
 8.00 0 100 -0.90140  
 7.75 0 100 -1.21285  
 7.50 0 100 -1.63756  
 7.25 0 100 -2.21901  
 7.00 0 100 -3.01897  
 6.75 0 100 -4.12578  
 6.50 0 100 -5.66506  
 6.25 0 100 -7.81052  
 6.00 0 100 -10.78454  
 5.75 0 100 -14.81699  
 5.50 0 100 -19.97526  
 5.25 0 100 -25.64086  
 5.00 0 100 -29.06889  
 4.75 0 100 -21.62878  
 4.50 0 100 20.78939  
 4.25 0 100 162.23524  
 4.00 0 100 569.98035  
 3.75 0 100 1682.17944  
 3.50 0 100 4664.57223  
 3.25 0 100 8755.62443  
 3.00 0 100 9667.10051  
 2.75 0 100 9891.49919  
 2.50 0 100 9962.30831  
 2.25 0 100 9986.62054  
 100.00 0 110 -0.00000  
 50.00 0 110 -0.00000  
 40.00 0 110 -0.00000  
 30.00 0 110 -0.00003  
 25.00 0 110 -0.00009  
 20.00 0 110 -0.00043  
 18.00 0 110 -0.00089  
 16.00 0 110 -0.00207  
 14.00 0 110 -0.00557  
 13.00 0 110 -0.00984  
 12.00 0 110 -0.01864  
 11.00 0 110 -0.03887  
 10.50 0 110 -0.05874  
 10.00 0 110 -0.09191

9.75 0 110 -0.11653  
 9.50 0 110 -0.14907  
 9.25 0 110 -0.19238  
 9.00 0 110 -0.25040  
 8.75 0 110 -0.32855  
 8.50 0 110 -0.43438  
 8.25 0 110 -0.57837  
 8.00 0 110 -0.77524  
 7.75 0 110 -1.04565  
 7.50 0 110 -1.41890  
 7.25 0 110 -1.93677  
 7.00 0 110 -2.65918  
 6.75 0 110 -3.67206  
 6.50 0 110 -5.09752  
 6.25 0 110 -7.10400  
 6.00 0 110 -9.90784  
 5.75 0 110 -13.73994  
 5.50 0 110 -18.70708  
 5.25 0 110 -24.37014  
 5.00 0 110 -28.60570  
 4.75 0 110 -24.71142  
 4.50 0 110 5.74285  
 4.25 0 110 110.42934  
 4.00 0 110 409.52910  
 3.75 0 110 1204.67150  
 3.50 0 110 3259.25703  
 3.25 0 110 7668.05811  
 3.00 0 110 9423.44550  
 2.75 0 110 9812.71090  
 2.50 0 110 9932.78781  
 2.25 0 110 9975.03058  
 100.00 0 120 -0.00000  
 50.00 0 120 -0.00000  
 40.00 0 120 -0.00001  
 30.00 0 120 -0.00004  
 25.00 0 120 -0.00012  
 20.00 0 120 -0.00052  
 18.00 0 120 -0.00106  
 16.00 0 120 -0.00243  
 14.00 0 120 -0.00640  
 13.00 0 120 -0.01115  
 12.00 0 120 -0.02071  
 11.00 0 120 -0.04185  
 10.50 0 120 -0.06200  
 10.00 0 120 -0.09488  
 9.75 0 120 -0.11896  
 9.50 0 120 -0.15055  
 9.25 0 120 -0.19237  
 9.00 0 120 -0.24822  
 8.75 0 120 -0.32338  
 8.50 0 120 -0.42533  
 8.25 0 120 -0.56457  
 8.00 0 120 -0.75602  
 7.75 0 120 -1.02079  
 7.50 0 120 -1.38898  
 7.25 0 120 -1.90347  
 7.00 0 120 -2.62543  
 6.75 0 120 -3.64190  
 6.50 0 120 -5.07557  
 6.25 0 120 -7.09596  
 6.00 0 120 -9.92710  
 5.75 0 120 -13.83738  
 5.50 0 120 -19.07288  
 5.25 0 120 -25.63825  
 5.00 0 120 -32.69856  
 4.75 0 120 -37.08058  
 4.50 0 120 -29.68578  
 4.25 0 120 12.90828  
 4.00 0 120 148.02903  
 3.75 0 120 512.88266  
 3.50 0 120 1433.17302  
 3.25 0 120 3676.09259  
 3.00 0 120 7862.04057  
 2.75 0 120 9383.26400  
 2.50 0 120 9768.78951  
 2.25 0 120 9905.28251  
 100.00 0 130 -0.00000  
 50.00 0 130 -0.00000  
 40.00 0 130 -0.00001  
 30.00 0 130 -0.00005  
 25.00 0 130 -0.00015  
 20.00 0 130 -0.00066  
 18.00 0 130 -0.00134  
 16.00 0 130 -0.00305  
 14.00 0 130 -0.00795  
 13.00 0 130 -0.01376  
 12.00 0 130 -0.02530  
 11.00 0 130 -0.05047  
 10.50 0 130 -0.07417  
 10.00 0 130 -0.11267  
 9.75 0 130 -0.14085  
 9.50 0 130 -0.17788  
 9.25 0 130 -0.22707  
 9.00 0 130 -0.29310  
 8.75 0 130 -0.38259  
 8.50 0 130 -0.50494  
 8.25 0 130 -0.67353  
 8.00 0 130 -0.90728  
 7.75 0 130 -1.23297  
 7.50 0 130 -1.68827  
 7.25 0 130 -2.32589  
 7.00 0 130 -3.21906  
 6.75 0 130 -4.46849

6.50 0 130 -6.21089  
6.25 0 130 -8.62795  
6.00 0 130 -11.95241  
5.75 0 130 -16.46173  
5.50 0 130 -22.43568  
5.25 0 130 -30.02287  
5.00 0 130 -38.89577  
4.75 0 130 -47.44067  
4.50 0 130 -50.96236  
4.25 0 130 -37.84145  
4.00 0 130 18.57876  
3.75 0 130 177.22652  
3.50 0 130 566.58345  
3.25 0 130 1466.21027  
3.00 0 130 3481.08009  
2.75 0 130 7344.85114  
2.50 0 130 9189.76414  
2.25 0 130 9677.94677  
100.00 0 140 -0.00000  
50.00 0 140 -0.00000  
40.00 0 140 -0.00001  
30.00 0 140 -0.00006  
25.00 0 140 -0.00019  
20.00 0 140 -0.00084  
18.00 0 140 -0.00172  
16.00 0 140 -0.00392  
14.00 0 140 -0.01024  
13.00 0 140 -0.01774  
12.00 0 140 -0.03276  
11.00 0 140 -0.06585  
10.50 0 140 -0.09752  
10.00 0 140 -0.14997  
9.75 0 140 -0.18904  
9.50 0 140 -0.24115  
9.25 0 140 -0.31148  
9.00 0 140 -0.40742  
8.75 0 140 -0.53959  
8.50 0 140 -0.72305  
8.25 0 140 -0.97918  
8.00 0 140 -1.33799  
7.75 0 140 -1.84119  
7.50 0 140 -2.54592  
7.25 0 140 -3.52913  
7.00 0 140 -4.89217  
6.75 0 140 -6.76440  
6.50 0 140 -9.30289  
6.25 0 140 -12.68120  
6.00 0 140 -17.05109  
5.75 0 140 -22.44122  
5.50 0 140 -28.51807  
5.25 0 140 -34.06318  
5.00 0 140 -35.90736  
4.75 0 140 -26.91206  
4.50 0 140 7.55585  
4.25 0 140 95.26739  
4.00 0 140 285.51317  
3.75 0 140 661.46320  
3.50 0 140 1361.22857  
3.25 0 140 2623.30573  
3.00 0 140 4897.15924  
2.75 0 140 7903.02117  
2.50 0 140 9195.56897  
2.25 0 140 9656.56009  
100.00 0 150 -0.00000  
50.00 0 150 -0.00000  
40.00 0 150 -0.00001  
30.00 0 150 -0.00007  
25.00 0 150 -0.00024  
20.00 0 150 -0.00105  
18.00 0 150 -0.00216  
16.00 0 150 -0.00494  
14.00 0 150 -0.01305  
13.00 0 150 -0.02281  
12.00 0 150 -0.04267  
11.00 0 150 -0.08783  
10.50 0 150 -0.13259  
10.00 0 150 -0.20935  
9.75 0 150 -0.26816  
9.50 0 150 -0.34821  
9.25 0 150 -0.45845  
9.00 0 150 -0.61173  
8.75 0 150 -0.82643  
8.50 0 150 -1.12863  
8.25 0 150 -1.55486  
8.00 0 150 -2.15545  
7.75 0 150 -2.99834  
7.50 0 150 -4.17264  
7.25 0 150 -5.79037  
7.00 0 150 -7.98252  
6.75 0 150 -10.87996  
6.50 0 150 -14.55706  
6.25 0 150 -18.88561  
6.00 0 150 -23.18096  
5.75 0 150 -25.38625  
5.50 0 150 -20.28599  
5.25 0 150 4.16878  
5.00 0 150 73.82861  
4.75 0 150 240.13123  
4.50 0 150 596.78897  
4.25 0 150 1296.59710  
4.00 0 150 2555.37460  
3.75 0 150 4628.63404  
3.50 0 150 7284.95740

3.25 0 150 8698.04245  
3.00 0 150 9291.33417  
2.75 0 150 9594.33583  
2.50 0 150 9766.63924  
2.25 0 150 9862.13107  
100.00 0 160 -0.00000  
50.00 0 160 -0.00000  
40.00 0 160 -0.00001  
30.00 0 160 -0.00008  
25.00 0 160 -0.00028  
20.00 0 160 -0.00124  
18.00 0 160 -0.00257  
16.00 0 160 -0.00593  
14.00 0 160 -0.01589  
13.00 0 160 -0.02808  
12.00 0 160 -0.05339  
11.00 0 160 -0.11310  
10.50 0 160 -0.17466  
10.00 0 160 -0.28397  
9.75 0 160 -0.36995  
9.50 0 160 -0.48908  
9.25 0 160 -0.65580  
9.00 0 160 -0.89090  
8.75 0 160 -1.22395  
8.50 0 160 -1.69653  
8.25 0 160 -2.36588  
8.00 0 160 -3.30891  
7.75 0 160 -4.62512  
7.50 0 160 -6.43557  
7.25 0 160 -8.87024  
7.00 0 160 -12.02492  
6.75 0 160 -15.83998  
6.50 0 160 -19.78281  
6.25 0 160 -22.04849  
6.00 0 160 -17.61378  
5.75 0 160 6.31898  
5.50 0 160 80.46734  
5.25 0 160 274.54394  
5.00 0 160 736.66351  
4.75 0 160 1754.58026  
4.50 0 160 3816.19902  
4.25 0 160 7164.47040  
4.00 0 160 8863.76472  
3.75 0 160 9396.65155  
3.50 0 160 9641.68967  
3.25 0 160 9779.70711  
3.00 0 160 9861.66651  
2.75 0 160 9911.98447  
2.50 0 160 9943.53385  
2.25 0 160 9963.58257  
100.00 0 170 -0.00000  
50.00 0 170 -0.00000  
40.00 0 170 -0.00001  
30.00 0 170 -0.00009  
25.00 0 170 -0.00031  
20.00 0 170 -0.00138  
18.00 0 170 -0.00287  
16.00 0 170 -0.00667  
14.00 0 170 -0.01805  
13.00 0 170 -0.03217  
12.00 0 170 -0.06196  
11.00 0 170 -0.13433  
10.50 0 170 -0.21113  
10.00 0 170 -0.35091  
9.75 0 170 -0.46275  
9.50 0 170 -0.61942  
9.25 0 170 -0.84078  
9.00 0 170 -1.15534  
8.75 0 170 -1.60349  
8.50 0 170 -2.24137  
8.25 0 170 -3.14513  
8.00 0 170 -4.41427  
7.75 0 170 -6.17107  
7.50 0 170 -8.54796  
7.25 0 170 -11.64195  
7.00 0 170 -15.38133  
6.75 0 170 -19.16219  
6.50 0 170 -20.88913  
6.25 0 170 -14.50653  
6.00 0 170 16.18010  
5.75 0 170 112.41960  
5.50 0 170 374.73277  
5.25 0 170 1035.36280  
5.00 0 170 2590.35294  
4.75 0 170 5934.64508  
4.50 0 170 8709.26699  
4.25 0 170 9434.19198  
4.00 0 170 9712.99981  
3.75 0 170 9846.97542  
3.50 0 170 9916.24413  
3.25 0 170 9953.50454  
3.00 0 170 9973.98734  
2.75 0 170 9985.38364  
2.50 0 170 9991.76721  
2.25 0 170 9995.35648  
100.00 0 180 -0.00000  
50.00 0 180 -0.00000  
40.00 0 180 -0.00002  
30.00 0 180 -0.00010  
25.00 0 180 -0.00032  
20.00 0 180 -0.00143  
18.00 0 180 -0.00298  
16.00 0 180 -0.00694

14.00 0 180 -0.01887  
13.00 0 180 -0.03373  
12.00 0 180 -0.06528  
11.00 0 180 -0.14278  
10.50 0 180 -0.22589  
10.00 0 180 -0.37850  
9.75 0 180 -0.50131  
9.50 0 180 -0.67397  
9.25 0 180 -0.91867  
9.00 0 180 -1.26723  
8.75 0 180 -1.76460  
8.50 0 180 -2.47301  
8.25 0 180 -3.47627  
8.00 0 180 -4.88244  
7.75 0 180 -6.82073  
7.50 0 180 -9.42105  
7.25 0 180 -12.74621  
7.00 0 180 -16.59703  
6.75 0 180 -19.97982  
6.50 0 180 -19.68929  
6.25 0 180 -6.61997  
6.00 0 180 43.58607  
5.75 0 180 193.43309  
5.50 0 180 596.76760  
5.25 0 180 1611.87193  
5.00 0 180 4000.39471  
4.75 0 180 7900.61029  
4.50 0 180 9253.37450  
4.25 0 180 9651.45982  
4.00 0 180 9825.25986  
3.75 0 180 9909.24976  
3.50 0 180 9952.01248  
3.25 0 180 9974.38445  
3.00 0 180 9986.25794  
2.75 0 180 9992.60801  
2.50 0 180 9996.01806  
2.25 0 180 9997.85334  
100.00 10 0 -0.00000  
50.00 10 0 -0.00000  
40.00 10 0 -0.00001  
30.00 10 0 -0.00006  
25.00 10 0 -0.00019  
20.00 10 0 -0.00080  
18.00 10 0 -0.00163  
16.00 10 0 -0.00374  
14.00 10 0 -0.01036  
13.00 10 0 -0.01937  
12.00 10 0 -0.04112  
11.00 10 0 -0.10290  
10.50 10 0 -0.17313  
10.00 10 0 -0.30114  
9.75 10 0 -0.40096  
9.50 10 0 -0.53638  
9.25 10 0 -0.72011  
9.00 10 0 -0.96931  
8.75 10 0 -1.30728  
8.50 10 0 -1.76604  
8.25 10 0 -2.39025  
8.00 10 0 -3.24338  
7.75 10 0 -4.41703  
7.50 10 0 -6.04342  
7.25 10 0 -8.30692  
7.00 10 0 -11.43608  
6.75 10 0 -15.61641  
6.50 10 0 -20.65429  
6.25 10 0 -24.94782  
6.00 10 0 -22.66597  
5.75 10 0 3.45008  
5.50 10 0 99.48087  
5.25 10 0 380.41160  
5.00 10 0 1118.53187  
4.75 10 0 2931.14102  
4.50 10 0 6911.09834  
4.25 10 0 9182.15976  
4.00 10 0 9719.58977  
3.75 10 0 9891.57014  
3.50 10 0 9956.13496  
3.25 10 0 9981.93370  
3.00 10 0 9992.50458  
2.75 10 0 9996.88086  
2.50 10 0 9998.70037  
2.25 10 0 9999.45821  
100.00 10 10 -0.00000  
50.00 10 10 -0.00000  
40.00 10 10 -0.00001  
30.00 10 10 -0.00006  
25.00 10 10 -0.00019  
20.00 10 10 -0.00079  
18.00 10 10 -0.00161  
16.00 10 10 -0.00371  
14.00 10 10 -0.01025  
13.00 10 10 -0.01918  
12.00 10 10 -0.04080  
11.00 10 10 -0.10233  
10.50 10 10 -0.17231  
10.00 10 10 -0.29968  
9.75 10 10 -0.39881  
9.50 10 10 -0.53301  
9.25 10 10 -0.71456  
9.00 10 10 -0.95991  
8.75 10 10 -1.29111  
8.50 10 10 -1.73802  
8.25 10 10 -2.34165

8.00 10 10 -3.15945  
7.75 10 10 -4.27348  
7.50 10 10 -5.80222  
7.25 10 10 -7.91424  
7.00 10 10 -10.83351  
6.75 10 10 -14.79974  
6.50 10 10 -19.87829  
6.25 10 10 -25.34208  
6.00 10 10 -27.94753  
5.75 10 10 -17.54567  
5.50 10 10 33.34936  
5.25 10 10 192.87985  
5.00 10 10 618.81381  
4.75 10 10 1654.30906  
4.50 10 10 3999.74949  
4.25 10 10 7859.88527  
4.00 10 10 9301.71197  
3.75 10 10 9718.96882  
3.50 10 10 9876.54971  
3.25 10 10 9943.69545  
3.00 10 10 9973.88396  
2.75 10 10 9987.79234  
2.50 10 10 9994.27307  
2.25 10 10 9997.30882  
100.00 10 20 -0.00000  
50.00 10 20 -0.00000  
40.00 10 20 -0.00001  
30.00 10 20 -0.00006  
25.00 10 20 -0.00018  
20.00 10 20 -0.00076  
18.00 10 20 -0.00156  
16.00 10 20 -0.00359  
14.00 10 20 -0.00995  
13.00 10 20 -0.01865  
12.00 10 20 -0.03985  
11.00 10 20 -0.10063  
10.50 10 20 -0.16985  
10.00 10 20 -0.29555  
9.75 10 20 -0.39301  
9.50 10 20 -0.52440  
9.25 10 20 -0.70117  
9.00 10 20 -0.93832  
8.75 10 20 -1.25544  
8.50 10 20 -1.67827  
8.25 10 20 -2.24089  
8.00 10 20 -2.98937  
7.75 10 20 -3.98765  
7.50 10 20 -5.32717  
7.25 10 20 -7.14156  
7.00 10 20 -9.62632  
6.75 10 20 -13.05639  
6.50 10 20 -17.77488  
6.25 10 20 -24.07470  
6.00 10 20 -31.77559  
5.75 10 20 -39.04085  
5.50 10 20 -39.45815  
5.25 10 20 -15.42752  
5.00 10 20 75.85538  
4.75 10 20 330.63284  
4.50 10 20 953.80250  
4.25 10 20 2367.60999  
4.00 10 20 5433.89275  
3.75 10 20 8635.20578  
3.50 10 20 9516.24684  
3.25 10 20 9797.40693  
3.00 10 20 9909.13698  
2.75 10 20 9958.12206  
2.50 10 20 9980.45820  
2.25 10 20 9990.82856  
100.00 10 30 -0.00000  
50.00 10 30 -0.00000  
40.00 10 30 -0.00001  
30.00 10 30 -0.00005  
25.00 10 30 -0.00017  
20.00 10 30 -0.00072  
18.00 10 30 -0.00148  
16.00 10 30 -0.00341  
14.00 10 30 -0.00948  
13.00 10 30 -0.01781  
12.00 10 30 -0.03829  
11.00 10 30 -0.09748  
10.50 10 30 -0.16508  
10.00 10 30 -0.28773  
9.75 10 30 -0.38261  
9.50 10 30 -0.51019  
9.25 10 30 -0.68119  
9.00 10 30 -0.90948  
8.75 10 30 -1.21287  
8.50 10 30 -1.61426  
8.25 10 30 -2.14326  
8.00 10 30 -2.83895  
7.75 10 30 -3.75450  
7.50 10 30 -4.96524  
7.25 10 30 -6.58214  
7.00 10 30 -8.77254  
6.75 10 30 -11.78683  
6.50 10 30 -15.97793  
6.25 10 30 -21.76633  
6.00 10 30 -29.41658  
5.75 10 30 -38.28661  
5.50 10 30 -44.75822  
5.25 10 30 -37.08369  
5.00 10 30 16.69319

4.75 10 30 196.15510  
 4.50 10 30 690.28779  
 4.25 10 30 1937.67500  
 4.00 10 30 4942.02510  
 3.75 10 30 8628.77463  
 3.50 10 30 9549.84604  
 3.25 10 30 9811.23289  
 3.00 10 30 9914.06050  
 2.75 10 30 9959.88652  
 2.50 10 30 9981.06003  
 2.25 10 30 9991.00896  
 100.00 10 40 -0.00000  
 50.00 10 40 -0.00000  
 40.00 10 40 -0.00001  
 30.00 10 40 -0.00005  
 25.00 10 40 -0.00015  
 20.00 10 40 -0.00067  
 18.00 10 40 -0.00137  
 16.00 10 40 -0.00318  
 14.00 10 40 -0.00887  
 13.00 10 40 -0.01670  
 12.00 10 40 -0.03601  
 11.00 10 40 -0.09205  
 10.50 10 40 -0.15620  
 10.00 10 40 -0.27264  
 9.75 10 40 -0.36270  
 9.50 10 40 -0.48375  
 9.25 10 40 -0.64592  
 9.00 10 40 -0.86226  
 8.75 10 40 -1.14956  
 8.50 10 40 -1.52940  
 8.25 10 40 -2.02980  
 8.00 10 40 -2.68798  
 7.75 10 40 -3.55512  
 7.50 10 40 -4.70450  
 7.25 10 40 -6.24463  
 7.00 10 40 -8.33726  
 6.75 10 40 -11.21304  
 6.50 10 40 -15.15367  
 6.25 10 40 -20.34433  
 6.00 10 40 -26.33733  
 5.75 10 40 -30.48954  
 5.50 10 40 -23.91384  
 5.25 10 40 18.21509  
 5.00 10 40 158.59729  
 4.75 10 40 545.91963  
 4.50 10 40 1521.52732  
 4.25 10 40 3873.37637  
 4.00 10 40 8045.12732  
 3.75 10 40 9455.14878  
 3.50 10 40 9808.29694  
 3.25 10 40 9926.39552  
 3.00 10 40 9970.80452  
 2.75 10 40 9988.27128  
 2.50 10 40 9995.26423  
 2.25 10 40 9998.08390  
 100.00 10 50 -0.00000  
 50.00 10 50 -0.00000  
 40.00 10 50 -0.00001  
 30.00 10 50 -0.00004  
 25.00 10 50 -0.00014  
 20.00 10 50 -0.00060  
 18.00 10 50 -0.00125  
 16.00 10 50 -0.00292  
 14.00 10 50 -0.00815  
 13.00 10 50 -0.01533  
 12.00 10 50 -0.03295  
 11.00 10 50 -0.08380  
 10.50 10 50 -0.14189  
 10.00 10 50 -0.24730  
 9.75 10 50 -0.32886  
 9.50 10 50 -0.43856  
 9.25 10 50 -0.58564  
 9.00 10 50 -0.78210  
 8.75 10 50 -1.04342  
 8.50 10 50 -1.38961  
 8.25 10 50 -1.84682  
 8.00 10 50 -2.45002  
 7.75 10 50 -3.24758  
 7.50 10 50 -4.30901  
 7.25 10 50 -5.73725  
 7.00 10 50 -7.68490  
 6.75 10 50 -10.36612  
 6.50 10 50 -14.03086  
 6.25 10 50 -18.80069  
 6.00 10 50 -24.09893  
 5.75 10 50 -27.02672  
 5.50 10 50 -18.22973  
 5.25 10 50 27.80388  
 5.00 10 50 174.12826  
 4.75 10 50 566.64777  
 4.50 10 50 1530.88454  
 4.25 10 50 3798.15419  
 4.00 10 50 7908.78971  
 3.75 10 50 9416.16173  
 3.50 10 50 9793.75719  
 3.25 10 50 9920.15919  
 3.00 10 50 9968.01028  
 2.75 10 50 9987.00763  
 2.50 10 50 9994.69430  
 2.25 10 50 9997.82847  
 100.00 10 60 -0.00000  
 50.00 10 60 -0.00000

40.00 10 60 -0.00001  
 30.00 10 60 -0.00004  
 25.00 10 60 -0.00012  
 20.00 10 60 -0.00054  
 18.00 10 60 -0.00112  
 16.00 10 60 -0.00264  
 14.00 10 60 -0.00738  
 13.00 10 60 -0.01380  
 12.00 10 60 -0.02930  
 11.00 10 60 -0.07328  
 10.50 10 60 -0.12308  
 10.00 10 60 -0.21319  
 9.75 10 60 -0.28286  
 9.50 10 60 -0.37658  
 9.25 10 60 -0.50235  
 9.00 10 60 -0.67057  
 8.75 10 60 -0.89466  
 8.50 10 60 -1.19197  
 8.25 10 60 -1.58504  
 8.00 10 60 -2.10363  
 7.75 10 60 -2.78807  
 7.50 10 60 -3.69504  
 7.25 10 60 -4.90677  
 7.00 10 60 -6.54474  
 6.75 10 60 -8.78480  
 6.50 10 60 -11.85946  
 6.25 10 60 -15.99995  
 6.00 10 60 -21.18969  
 5.75 10 60 -26.41865  
 5.50 10 60 -27.75270  
 5.25 10 60 -13.82862  
 5.00 10 60 43.81801  
 4.75 10 60 210.11846  
 4.50 10 60 623.39078  
 4.25 10 60 1565.02562  
 4.00 10 60 3594.93152  
 3.75 10 60 7302.18100  
 3.50 10 60 9118.86525  
 3.25 10 60 9625.89725  
 3.00 10 60 9824.42919  
 2.75 10 60 9914.02326  
 2.50 10 60 9957.02774  
 2.25 10 60 9978.30380  
 100.00 10 70 -0.00000  
 50.00 10 70 -0.00000  
 40.00 10 70 -0.00000  
 30.00 10 70 -0.00003  
 25.00 10 70 -0.00010  
 20.00 10 70 -0.00047  
 18.00 10 70 -0.00100  
 16.00 10 70 -0.00236  
 14.00 10 70 -0.00661  
 13.00 10 70 -0.01226  
 12.00 10 70 -0.02554  
 11.00 10 70 -0.06210  
 10.50 10 70 -0.10284  
 10.00 10 70 -0.17604  
 9.75 10 70 -0.23249  
 9.50 10 70 -0.30840  
 9.25 10 70 -0.41032  
 9.00 10 70 -0.54683  
 8.75 10 70 -0.72901  
 8.50 10 70 -0.97122  
 8.25 10 70 -1.29196  
 8.00 10 70 -1.71528  
 7.75 10 70 -2.27287  
 7.50 10 70 -3.00760  
 7.25 10 70 -3.97927  
 7.00 10 70 -5.27397  
 6.75 10 70 -7.01776  
 6.50 10 70 -9.39343  
 6.25 10 70 -12.65092  
 6.00 10 70 -17.08159  
 5.75 10 70 -22.87831  
 5.50 10 70 -29.70338  
 5.25 10 70 -35.59699  
 5.00 10 70 -34.53174  
 4.75 10 70 -11.38977  
 4.50 10 70 67.73736  
 4.25 10 70 273.73477  
 4.00 10 70 748.84710  
 3.75 10 70 1773.20636  
 3.50 10 70 3890.40921  
 3.25 10 70 7464.08738  
 3.00 10 70 9113.07211  
 2.75 10 70 9597.76373  
 2.50 10 70 9776.75656  
 2.25 10 70 9864.93268  
 100.00 10 80 -0.00000  
 50.00 10 80 -0.00000  
 40.00 10 80 -0.00000  
 30.00 10 80 -0.00003  
 25.00 10 80 -0.00009  
 20.00 10 80 -0.00042  
 18.00 10 80 -0.00089  
 16.00 10 80 -0.00213  
 14.00 10 80 -0.00594  
 13.00 10 80 -0.01091  
 12.00 10 80 -0.02220  
 11.00 10 80 -0.05205  
 10.50 10 80 -0.08454  
 10.00 10 80 -0.14223  
 9.75 10 80 -0.18651

9.50 10 80 -0.24599  
 9.25 10 80 -0.32587  
 9.00 10 80 -0.43303  
 8.75 10 80 -0.57651  
 8.50 10 80 -0.76810  
 8.25 10 80 -1.02311  
 8.00 10 80 -1.36155  
 7.75 10 80 -1.80960  
 7.50 10 80 -2.40216  
 7.25 10 80 -3.18672  
 7.00 10 80 -4.22969  
 6.75 10 80 -5.62658  
 6.50 10 80 -7.51724  
 6.25 10 80 -10.10661  
 6.00 10 80 -13.68646  
 5.75 10 80 -18.64021  
 5.50 10 80 -25.37978  
 5.25 10 80 -34.08422  
 5.00 10 80 -43.93121  
 4.75 10 80 -51.09793  
 4.50 10 80 -43.81895  
 4.25 10 80 9.66458  
 4.00 10 80 190.57486  
 3.75 10 80 701.56092  
 3.50 10 80 2037.39996  
 3.25 10 80 5354.42250  
 3.00 10 80 8810.64887  
 2.75 10 80 9588.68119  
 2.50 10 80 9810.20657  
 2.25 10 80 9904.07944  
 100.00 10 90 -0.00000  
 50.00 10 90 -0.00000  
 40.00 10 90 -0.00000  
 30.00 10 90 -0.00002  
 25.00 10 90 -0.00008  
 20.00 10 90 -0.00039  
 18.00 10 90 -0.00083  
 16.00 10 90 -0.00197  
 14.00 10 90 -0.00546  
 13.00 10 90 -0.00991  
 12.00 10 90 -0.01969  
 11.00 10 90 -0.04436  
 10.50 10 90 -0.07038  
 10.00 10 90 -0.11583  
 9.75 10 90 -0.15045  
 9.50 10 90 -0.19681  
 9.25 10 90 -0.25903  
 9.00 10 90 -0.34262  
 8.75 10 90 -0.45497  
 8.50 10 90 -0.60587  
 8.25 10 90 -0.80838  
 8.00 10 90 -1.07989  
 7.75 10 90 -1.44366  
 7.50 10 90 -1.93120  
 7.25 10 90 -2.58574  
 7.00 10 90 -3.46767  
 6.75 10 90 -4.66288  
 6.50 10 90 -6.29468  
 6.25 10 90 -8.53912  
 6.00 10 90 -11.63837  
 5.75 10 90 -15.89282  
 5.50 10 90 -21.57463  
 5.25 10 90 -28.60857  
 5.00 10 90 -35.62542  
 4.75 10 90 -37.39216  
 4.50 10 90 -18.10183  
 4.25 10 90 65.93023  
 4.00 10 90 330.96630  
 3.75 10 90 1081.85139  
 3.50 10 90 3111.48308  
 3.25 10 90 7628.67669  
 3.00 10 90 9415.66522  
 2.75 10 90 9804.59911  
 2.50 10 90 9927.90533  
 2.25 10 90 9972.45823  
 100.00 10 100 -0.00000  
 50.00 10 100 -0.00000  
 40.00 10 100 -0.00000  
 30.00 10 100 -0.00002  
 25.00 10 100 -0.00008  
 20.00 10 100 -0.00039  
 18.00 10 100 -0.00082  
 16.00 10 100 -0.00193  
 14.00 10 100 -0.00529  
 13.00 10 100 -0.00947  
 12.00 10 100 -0.01834  
 11.00 10 100 -0.03965  
 10.50 10 100 -0.06133  
 10.00 10 100 -0.09839  
 9.75 10 100 -0.12628  
 9.50 10 100 -0.16342  
 9.25 10 100 -0.21311  
 9.00 10 100 -0.27985  
 8.75 10 100 -0.36973  
 8.50 10 100 -0.49106  
 8.25 10 100 -0.65517  
 8.00 10 100 -0.87756  
 7.75 10 100 -1.17954  
 7.50 10 100 -1.59067  
 7.25 10 100 -2.15238  
 7.00 10 100 -2.92335  
 6.75 10 100 -3.98721  
 6.50 10 100 -5.46285

6.25 10 100 -7.51555  
6.00 10 100 -10.36074  
5.75 10 100 -14.23488  
5.50 10 100 -19.26235  
5.25 10 100 -25.03444  
5.00 10 100 -29.44085  
4.75 10 100 -25.61948  
4.50 10 100 5.78673  
4.25 10 100 116.16813  
4.00 10 100 438.69192  
3.75 10 100 1317.01710  
3.50 10 100 3643.08715  
3.25 10 100 8121.33624  
3.00 10 100 9520.34245  
2.75 10 100 9842.77856  
2.50 10 100 9943.86121  
2.25 10 100 9979.35156  
100.00 10 110 -0.00000  
50.00 10 110 -0.00000  
40.00 10 110 -0.00000  
30.00 10 110 -0.00003  
25.00 10 110 -0.00009  
20.00 10 110 -0.00043  
18.00 10 110 -0.00089  
16.00 10 110 -0.00207  
14.00 10 110 -0.00555  
13.00 10 110 -0.00978  
12.00 10 110 -0.01849  
11.00 10 110 -0.03845  
10.50 10 110 -0.05801  
10.00 10 110 -0.09059  
9.75 10 110 -0.11474  
9.50 10 110 -0.14663  
9.25 10 110 -0.18905  
9.00 10 110 -0.24582  
8.75 10 110 -0.32222  
8.50 10 110 -0.42558  
8.25 10 110 -0.56608  
8.00 10 110 -0.75794  
7.75 10 110 -1.02112  
7.50 10 110 -1.38383  
7.25 10 110 -1.88615  
7.00 10 110 -2.58540  
6.75 10 110 -3.56360  
6.50 10 110 -4.93727  
6.25 10 110 -6.86791  
6.00 10 110 -9.56612  
5.75 10 110 -13.26798  
5.50 10 110 -18.12558  
5.25 10 110 -23.86475  
5.00 10 110 -28.85311  
4.75 10 110 -27.72677  
4.50 10 110 -5.54722  
4.25 10 110 76.41296  
4.00 10 110 315.38586  
3.75 10 110 953.02098  
3.50 10 110 2590.51015  
3.25 10 110 6582.08084  
3.00 10 110 9181.87226  
2.75 10 110 9736.75796  
2.50 10 110 9903.62163  
2.25 10 110 9963.06064  
100.00 10 120 -0.00000  
50.00 10 120 -0.00000  
40.00 10 120 -0.00001  
30.00 10 120 -0.00004  
25.00 10 120 -0.00012  
20.00 10 120 -0.00052  
18.00 10 120 -0.00106  
16.00 10 120 -0.00243  
14.00 10 120 -0.00639  
13.00 10 120 -0.01112  
12.00 10 120 -0.02062  
11.00 10 120 -0.04160  
10.50 10 120 -0.06155  
10.00 10 120 -0.09406  
9.75 10 120 -0.11784  
9.50 10 120 -0.14902  
9.25 10 120 -0.19026  
9.00 10 120 -0.24529  
8.75 10 120 -0.31931  
8.50 10 120 -0.41963  
8.25 10 120 -0.55655  
8.00 10 120 -0.74465  
7.75 10 120 -1.00455  
7.50 10 120 -1.36560  
7.25 10 120 -1.86949  
7.00 10 120 -2.57561  
6.75 10 120 -3.56824  
6.50 10 120 -4.96611  
6.25 10 120 -6.93338  
6.00 10 120 -9.68834  
5.75 10 120 -13.49755  
5.50 10 120 -18.62258  
5.25 10 120 -25.13799  
5.00 10 120 -32.42797  
4.75 10 120 -37.92077  
4.50 10 120 -34.06233  
4.25 10 120 -1.25896  
4.00 10 120 108.46127  
3.75 10 120 409.41744  
3.50 10 120 1170.71834  
3.25 10 120 3018.22206

3.00 10 120 7032.58764  
2.75 10 120 9184.51501  
2.50 10 120 9692.86802  
2.25 10 120 9869.76345  
100.00 10 130 -0.00000  
50.00 10 130 -0.00000  
40.00 10 130 -0.00001  
30.00 10 130 -0.00005  
25.00 10 130 -0.00015  
20.00 10 130 -0.00066  
18.00 10 130 -0.00135  
16.00 10 130 -0.00305  
14.00 10 130 -0.00795  
13.00 10 130 -0.01375  
12.00 10 130 -0.02527  
11.00 10 130 -0.05034  
10.50 10 130 -0.07394  
10.00 10 130 -0.11223  
9.75 10 130 -0.14023  
9.50 10 130 -0.17702  
9.25 10 130 -0.22588  
9.00 10 130 -0.29144  
8.75 10 130 -0.38026  
8.50 10 130 -0.50166  
8.25 10 130 -0.66888  
8.00 10 130 -0.90066  
7.75 10 130 -1.22349  
7.50 10 130 -1.67459  
7.25 10 130 -2.30602  
7.00 10 130 -3.18994  
6.75 10 130 -4.42551  
6.50 10 130 -6.14709  
6.25 10 130 -8.53297  
6.00 10 130 -11.81156  
5.75 10 130 -16.25592  
5.50 10 130 -22.14511  
5.25 10 130 -29.64157  
5.00 10 130 -38.47439  
4.75 10 130 -47.19764  
4.50 10 130 -51.55482  
4.25 10 130 -41.00067  
4.00 10 130 8.58245  
3.75 10 130 150.21822  
3.50 10 130 498.73861  
3.25 10 130 1302.41637  
3.00 10 130 3096.70455  
2.75 10 130 6796.52462  
2.50 10 130 9051.55186  
2.25 10 130 9635.75167  
100.00 10 140 -0.00000  
50.00 10 140 -0.00000  
40.00 10 140 -0.00001  
30.00 10 140 -0.00006  
25.00 10 140 -0.00019  
20.00 10 140 -0.00084  
18.00 10 140 -0.00173  
16.00 10 140 -0.00392  
14.00 10 140 -0.01024  
13.00 10 140 -0.01775  
12.00 10 140 -0.03275  
11.00 10 140 -0.06581  
10.50 10 140 -0.09743  
10.00 10 140 -0.14977  
9.75 10 140 -0.18876  
9.50 10 140 -0.24075  
9.25 10 140 -0.31091  
9.00 10 140 -0.40661  
8.75 10 140 -0.53843  
8.50 10 140 -0.72140  
8.25 10 140 -0.97683  
8.00 10 140 -1.33463  
7.75 10 140 -1.83636  
7.50 10 140 -2.53894  
7.25 10 140 -3.51899  
7.00 10 140 -4.87736  
6.75 10 140 -6.74263  
6.50 10 140 -9.27071  
6.25 10 140 -12.63343  
6.00 10 140 -16.98007  
5.75 10 140 -22.33605  
5.50 10 140 -28.36427  
5.25 10 140 -33.84420  
5.00 10 140 -35.61154  
4.75 10 140 -26.55290  
4.50 10 140 7.88818  
4.25 10 140 95.28527  
4.00 10 140 284.45835  
3.75 10 140 657.49583  
3.50 10 140 1350.04927  
3.25 10 140 2595.00839  
3.00 10 140 4829.04191  
2.75 10 140 7841.77254  
2.50 10 140 9172.01967  
2.25 10 140 9646.66615  
100.00 10 150 -0.00000  
50.00 10 150 -0.00000  
40.00 10 150 -0.00001  
30.00 10 150 -0.00007  
25.00 10 150 -0.00024  
20.00 10 150 -0.00105  
18.00 10 150 -0.00216  
16.00 10 150 -0.00494  
14.00 10 150 -0.01305

13.00 10 150 -0.02282  
 12.00 10 150 -0.04268  
 11.00 10 150 -0.08783  
 10.50 10 150 -0.13257  
 10.00 10 150 -0.20928  
 9.75 10 150 -0.26806  
 9.50 10 150 -0.34807  
 9.25 10 150 -0.45823  
 9.00 10 150 -0.61140  
 8.75 10 150 -0.82596  
 8.50 10 150 -1.12795  
 8.25 10 150 -1.55386  
 8.00 10 150 -2.15400  
 7.75 10 150 -2.99624  
 7.50 10 150 -4.16959  
 7.25 10 150 -5.78593  
 7.00 10 150 -7.97602  
 6.75 10 150 -10.87041  
 6.50 10 150 -14.54295  
 6.25 10 150 -18.86466  
 6.00 10 150 -23.14973  
 5.75 10 150 -25.33952  
 5.50 10 150 -20.21603  
 5.25 10 150 4.27322  
 5.00 10 150 73.98326  
 4.75 10 150 240.35671  
 4.50 10 150 597.10908  
 4.25 10 150 1297.03144  
 4.00 10 150 2555.91634  
 3.75 10 150 4629.18824  
 3.50 10 150 7285.07610  
 3.25 10 150 8697.84098  
 3.00 10 150 9291.02856  
 2.75 10 150 9593.97925  
 2.50 10 150 9766.29255  
 2.25 10 150 9861.84558  
 100.00 10 160 -0.00000  
 50.00 10 160 -0.00000  
 40.00 10 160 -0.00001  
 30.00 10 160 -0.00008  
 25.00 10 160 -0.00028  
 20.00 10 160 -0.00124  
 18.00 10 160 -0.00257  
 16.00 10 160 -0.00594  
 14.00 10 160 -0.01589  
 13.00 10 160 -0.02809  
 12.00 10 160 -0.05339  
 11.00 10 160 -0.11311  
 10.50 10 160 -0.17466  
 10.00 10 160 -0.28396  
 9.75 10 160 -0.36993  
 9.50 10 160 -0.48905  
 9.25 10 160 -0.65574  
 9.00 10 160 -0.89080  
 8.75 10 160 -1.22381  
 8.50 10 160 -1.69631  
 8.25 10 160 -2.36555  
 8.00 10 160 -3.30843  
 7.75 10 160 -4.62441  
 7.50 10 160 -6.43452  
 7.25 10 160 -8.86869  
 7.00 10 160 -12.02263  
 6.75 10 160 -15.83657  
 6.50 10 160 -19.77771  
 6.25 10 160 -22.04078  
 6.00 10 160 -17.60197  
 5.75 10 160 6.33737  
 5.50 10 160 80.49667  
 5.25 10 160 274.59203  
 5.00 10 160 736.74470  
 4.75 10 160 1754.72089  
 4.50 10 160 3816.44580  
 4.25 10 160 7164.73003  
 4.00 10 160 8863.85325  
 3.75 10 160 9396.69469  
 3.50 10 160 9641.71708  
 3.25 10 160 9779.72531  
 3.00 10 160 9861.67890  
 2.75 10 160 9911.99303  
 2.50 10 160 9943.53980  
 2.25 10 160 9963.58671  
 100.00 10 170 -0.00000  
 50.00 10 170 -0.00000  
 40.00 10 170 -0.00001  
 30.00 10 170 -0.00009  
 25.00 10 170 -0.00031  
 20.00 10 170 -0.00138  
 18.00 10 170 -0.00287  
 16.00 10 170 -0.00667  
 14.00 10 170 -0.01805  
 13.00 10 170 -0.03217  
 12.00 10 170 -0.06196  
 11.00 10 170 -0.13433  
 10.50 10 170 -0.21113  
 10.00 10 170 -0.35091  
 9.75 10 170 -0.46275  
 9.50 10 170 -0.61942  
 9.25 10 170 -0.84077  
 9.00 10 170 -1.15533  
 8.75 10 170 -1.60347  
 8.50 10 170 -2.24133  
 8.25 10 170 -3.14507  
 8.00 10 170 -4.41418

7.75 10 170 -6.17094  
7.50 10 170 -8.54776  
7.25 10 170 -11.64164  
7.00 10 170 -15.38085  
6.75 10 170 -19.16146  
6.50 10 170 -20.88797  
6.25 10 170 -14.50462  
6.00 10 170 16.18338  
5.75 10 170 112.42557  
5.50 10 170 374.74440  
5.25 10 170 1035.38665  
5.00 10 170 2590.40316  
4.75 10 170 5934.74052  
4.50 10 170 8709.29815  
4.25 10 170 9434.20346  
4.00 10 170 9713.00584  
3.75 10 170 9846.97884  
3.50 10 170 9916.24615  
3.25 10 170 9953.50575  
3.00 10 170 9973.98807  
2.75 10 170 9985.38408  
2.50 10 170 9991.76747  
2.25 10 170 9995.35664  
100.00 10 180 -0.00000  
50.00 10 180 -0.00000  
40.00 10 180 -0.00002  
30.00 10 180 -0.00010  
25.00 10 180 -0.00032  
20.00 10 180 -0.00143  
18.00 10 180 -0.00298  
16.00 10 180 -0.00694  
14.00 10 180 -0.01887  
13.00 10 180 -0.03373  
12.00 10 180 -0.06528  
11.00 10 180 -0.14278  
10.50 10 180 -0.22589  
10.00 10 180 -0.37850  
9.75 10 180 -0.50131  
9.50 10 180 -0.67397  
9.25 10 180 -0.91867  
9.00 10 180 -1.26723  
8.75 10 180 -1.76460  
8.50 10 180 -2.47301  
8.25 10 180 -3.47627  
8.00 10 180 -4.88244  
7.75 10 180 -6.82073  
7.50 10 180 -9.42105  
7.25 10 180 -12.74621  
7.00 10 180 -16.59703  
6.75 10 180 -19.97982  
6.50 10 180 -19.68929  
6.25 10 180 -6.61997  
6.00 10 180 43.58607  
5.75 10 180 193.43309  
5.50 10 180 596.76760  
5.25 10 180 1611.87193  
5.00 10 180 4000.39471  
4.75 10 180 7900.61029  
4.50 10 180 9253.37450  
4.25 10 180 9651.45982  
4.00 10 180 9825.25986  
3.75 10 180 9909.24976  
3.50 10 180 9952.01248  
3.25 10 180 9974.38445  
3.00 10 180 9986.25794  
2.75 10 180 9992.60801  
2.50 10 180 9996.01806  
2.25 10 180 9997.85334  
100.00 20 0 -0.00000  
50.00 20 0 -0.00000  
40.00 20 0 -0.00001  
30.00 20 0 -0.00006  
25.00 20 0 -0.00019  
20.00 20 0 -0.00080  
18.00 20 0 -0.00163  
16.00 20 0 -0.00374  
14.00 20 0 -0.01036  
13.00 20 0 -0.01937  
12.00 20 0 -0.04112  
11.00 20 0 -0.10290  
10.50 20 0 -0.17313  
10.00 20 0 -0.30114  
9.75 20 0 -0.40096  
9.50 20 0 -0.53638  
9.25 20 0 -0.72011  
9.00 20 0 -0.96931  
8.75 20 0 -1.30728  
8.50 20 0 -1.76604  
8.25 20 0 -2.39025  
8.00 20 0 -3.24338  
7.75 20 0 -4.41703  
7.50 20 0 -6.04342  
7.25 20 0 -8.30692  
7.00 20 0 -11.43608  
6.75 20 0 -15.61641  
6.50 20 0 -20.65429  
6.25 20 0 -24.94782  
6.00 20 0 -22.66597  
5.75 20 0 3.45008  
5.50 20 0 99.48087  
5.25 20 0 380.41160  
5.00 20 0 1118.53187  
4.75 20 0 2931.14102

4.50 20 0 6911.09834  
 4.25 20 0 9182.15976  
 4.00 20 0 9719.58977  
 3.75 20 0 9891.57014  
 3.50 20 0 9956.13496  
 3.25 20 0 9981.93370  
 3.00 20 0 9992.50458  
 2.75 20 0 9996.88086  
 2.50 20 0 9998.70037  
 2.25 20 0 9999.45821  
 100.00 20 10 -0.00000  
 50.00 20 10 -0.00000  
 40.00 20 10 -0.00001  
 30.00 20 10 -0.00006  
 25.00 20 10 -0.00019  
 20.00 20 10 -0.00079  
 18.00 20 10 -0.00161  
 16.00 20 10 -0.00370  
 14.00 20 10 -0.01024  
 13.00 20 10 -0.01914  
 12.00 20 10 -0.04070  
 11.00 20 10 -0.10202  
 10.50 20 10 -0.17173  
 10.00 20 10 -0.29862  
 9.75 20 10 -0.39737  
 9.50 20 10 -0.53107  
 9.25 20 10 -0.71198  
 9.00 20 10 -0.95648  
 8.75 20 10 -1.28657  
 8.50 20 10 -1.73207  
 8.25 20 10 -2.33390  
 8.00 20 10 -3.14939  
 7.75 20 10 -4.26043  
 7.50 20 10 -5.78516  
 7.25 20 10 -7.89156  
 7.00 20 10 -10.80234  
 6.75 20 10 -14.75474  
 6.50 20 10 -19.80895  
 6.25 20 10 -25.22720  
 6.00 20 10 -27.74360  
 5.75 20 10 -17.16277  
 5.50 20 10 34.09610  
 5.25 20 10 194.36184  
 5.00 20 10 621.73816  
 4.75 20 10 1659.87424  
 4.50 20 10 4009.44985  
 4.25 20 10 7865.16125  
 4.00 20 10 9302.05300  
 3.75 20 10 9718.69067  
 3.50 20 10 9876.27204  
 3.25 20 10 9943.50035  
 3.00 20 10 9973.76165  
 2.75 20 10 9987.72016  
 2.50 20 10 9994.23211  
 2.25 20 10 9997.28621  
 100.00 20 20 -0.00000  
 50.00 20 20 -0.00000  
 40.00 20 20 -0.00001  
 30.00 20 20 -0.00006  
 25.00 20 20 -0.00018  
 20.00 20 20 -0.00076  
 18.00 20 20 -0.00155  
 16.00 20 20 -0.00357  
 14.00 20 20 -0.00989  
 13.00 20 20 -0.01851  
 12.00 20 20 -0.03948  
 11.00 20 20 -0.09945  
 10.50 20 20 -0.16769  
 10.00 20 20 -0.29157  
 9.75 20 20 -0.38763  
 9.50 20 20 -0.51716  
 9.25 20 20 -0.69146  
 9.00 20 20 -0.92537  
 8.75 20 20 -1.23826  
 8.50 20 20 -1.65560  
 8.25 20 20 -2.21108  
 8.00 20 20 -2.95020  
 7.75 20 20 -3.93597  
 7.50 20 20 -5.25819  
 7.25 20 20 -7.04758  
 7.00 20 20 -9.49427  
 6.75 20 20 -12.86353  
 6.50 20 20 -17.48148  
 6.25 20 20 -23.61252  
 6.00 20 20 -31.03155  
 5.75 20 20 -37.83982  
 5.50 20 20 -37.56300  
 5.25 20 20 -12.62269  
 5.00 20 20 79.37754  
 4.75 20 20 332.87196  
 4.50 20 20 946.26577  
 4.25 20 20 2320.30066  
 4.00 20 20 5251.41847  
 3.75 20 20 8519.45910  
 3.50 20 20 9468.12111  
 3.25 20 20 9772.70194  
 3.00 20 20 9895.63991  
 2.75 20 20 9950.67499  
 2.50 20 20 9976.36983  
 2.25 20 20 9988.60653  
 100.00 20 30 -0.00000  
 50.00 20 30 -0.00000  
 40.00 20 30 -0.00001

30.00 20 30 -0.00005  
 25.00 20 30 -0.00017  
 20.00 20 30 -0.00071  
 18.00 20 30 -0.00146  
 16.00 20 30 -0.00338  
 14.00 20 30 -0.00935  
 13.00 20 30 -0.01753  
 12.00 20 30 -0.03755  
 11.00 20 30 -0.09513  
 10.50 20 30 -0.16078  
 10.00 20 30 -0.27982  
 9.75 20 30 -0.37191  
 9.50 20 30 -0.49574  
 9.25 20 30 -0.66175  
 9.00 20 30 -0.88341  
 8.75 20 30 -1.17804  
 8.50 20 30 -1.56782  
 8.25 20 30 -2.08130  
 8.00 20 30 -2.75591  
 7.75 20 30 -3.64204  
 7.50 20 30 -4.81019  
 7.25 20 30 -6.36306  
 7.00 20 30 -8.45424  
 6.75 20 30 -11.31345  
 6.50 20 30 -15.26895  
 6.25 20 30 -20.73182  
 6.00 20 30 -28.04061  
 5.75 20 30 -36.90850  
 5.50 20 30 -44.86943  
 5.25 20 30 -43.37850  
 5.00 20 30 -8.64357  
 4.75 20 30 119.16948  
 4.50 20 30 482.44235  
 4.25 20 30 1409.66370  
 4.00 20 30 3640.86683  
 3.75 20 30 7769.88854  
 3.50 20 30 9331.46917  
 3.25 20 30 9726.79204  
 3.00 20 30 9870.43287  
 2.75 20 30 9936.45795  
 2.50 20 30 9968.35328  
 2.25 20 30 9984.11803  
 100.00 20 40 -0.00000  
 50.00 20 40 -0.00000  
 40.00 20 40 -0.00001  
 30.00 20 40 -0.00005  
 25.00 20 40 -0.00015  
 20.00 20 40 -0.00066  
 18.00 20 40 -0.00135  
 16.00 20 40 -0.00313  
 14.00 20 40 -0.00868  
 13.00 20 40 -0.01628  
 12.00 20 40 -0.03490  
 11.00 20 40 -0.08861  
 10.50 20 40 -0.14992  
 10.00 20 40 -0.26109  
 9.75 20 40 -0.34705  
 9.50 20 40 -0.46257  
 9.25 20 40 -0.61731  
 9.00 20 40 -0.82371  
 8.75 20 40 -1.09766  
 8.50 20 40 -1.45948  
 8.25 20 40 -1.93524  
 8.00 20 40 -2.55894  
 7.75 20 40 -3.37629  
 7.50 20 40 -4.45114  
 7.25 20 40 -5.87615  
 7.00 20 40 -7.78837  
 6.75 20 40 -10.38637  
 6.50 20 40 -13.93117  
 6.25 20 40 -18.67294  
 6.00 20 40 -24.54435  
 5.75 20 40 -30.22734  
 5.50 20 40 -30.69130  
 5.25 20 40 -11.25785  
 5.00 20 40 65.81664  
 4.75 20 40 290.36693  
 4.50 20 40 865.88796  
 4.25 20 40 2241.09252  
 4.00 20 40 5392.31503  
 3.75 20 40 8708.97436  
 3.50 20 40 9549.38324  
 3.25 20 40 9811.37617  
 3.00 20 40 9916.18220  
 2.75 20 40 9961.77498  
 2.50 20 40 9982.36266  
 2.25 20 40 9991.81828  
 100.00 20 50 -0.00000  
 50.00 20 50 -0.00000  
 40.00 20 50 -0.00001  
 30.00 20 50 -0.00004  
 25.00 20 50 -0.00013  
 20.00 20 50 -0.00059  
 18.00 20 50 -0.00123  
 16.00 20 50 -0.00285  
 14.00 20 50 -0.00792  
 13.00 20 50 -0.01482  
 12.00 20 50 -0.03161  
 11.00 20 50 -0.07971  
 10.50 20 50 -0.13445  
 10.00 20 50 -0.23366  
 9.75 20 50 -0.31038  
 9.50 20 50 -0.41352

9.25 20 50 -0.55177  
 9.00 20 50 -0.73635  
 8.75 20 50 -0.98162  
 8.50 20 50 -1.30602  
 8.25 20 50 -1.73321  
 8.00 20 50 -2.29413  
 7.75 20 50 -3.03030  
 7.50 20 50 -3.99948  
 7.25 20 50 -5.28492  
 7.00 20 50 -7.00854  
 6.75 20 50 -9.34442  
 6.50 20 50 -12.51516  
 6.25 20 50 -16.71611  
 6.00 20 50 -21.81837  
 5.75 20 50 -26.48908  
 5.50 20 50 -25.91809  
 5.25 20 50 -6.46221  
 5.00 20 50 66.09590  
 4.75 20 50 270.87909  
 4.50 20 50 780.66809  
 4.25 20 50 1959.57109  
 4.00 20 50 4562.79872  
 3.75 20 50 8231.88129  
 3.50 20 50 9394.11229  
 3.25 20 50 9741.12340  
 3.00 20 50 9881.04517  
 2.75 20 50 9943.53754  
 2.50 20 50 9972.79051  
 2.25 20 50 9986.79232  
 100.00 20 60 -0.00000  
 50.00 20 60 -0.00000  
 40.00 20 60 -0.00001  
 30.00 20 60 -0.00004  
 25.00 20 60 -0.00012  
 20.00 20 60 -0.00052  
 18.00 20 60 -0.00110  
 16.00 20 60 -0.00257  
 14.00 20 60 -0.00713  
 13.00 20 60 -0.01326  
 12.00 20 60 -0.02791  
 11.00 20 60 -0.06912  
 10.50 20 60 -0.11560  
 10.00 20 60 -0.19954  
 9.75 20 60 -0.26440  
 9.50 20 60 -0.35161  
 9.25 20 60 -0.46860  
 9.00 20 60 -0.62501  
 8.75 20 60 -0.83320  
 8.50 20 60 -1.10903  
 8.25 20 60 -1.47284  
 8.00 20 60 -1.95090  
 7.75 20 60 -2.57784  
 7.50 20 60 -3.40072  
 7.25 20 60 -4.48568  
 7.00 20 60 -5.92813  
 6.75 20 60 -7.86583  
 6.50 20 60 -10.48794  
 6.25 20 60 -14.01581  
 6.00 20 60 -18.58694  
 5.75 20 60 -23.87415  
 5.50 20 60 -28.06559  
 5.25 20 60 -25.44079  
 5.00 20 60 -1.10258  
 4.75 20 60 79.65872  
 4.50 20 60 291.60298  
 4.25 20 60 786.55920  
 4.00 20 60 1859.55334  
 3.75 20 60 4060.25028  
 3.50 20 60 7575.99880  
 3.25 20 60 9109.03567  
 3.00 20 60 9572.61464  
 2.75 20 60 9754.24849  
 2.50 20 60 9850.75623  
 2.25 20 60 9907.89261  
 100.00 20 70 -0.00000  
 50.00 20 70 -0.00000  
 40.00 20 70 -0.00000  
 30.00 20 70 -0.00003  
 25.00 20 70 -0.00010  
 20.00 20 70 -0.00046  
 18.00 20 70 -0.00097  
 16.00 20 70 -0.00229  
 14.00 20 70 -0.00637  
 13.00 20 70 -0.01174  
 12.00 20 70 -0.02425  
 11.00 20 70 -0.05837  
 10.50 20 70 -0.09620  
 10.00 20 70 -0.16402  
 9.75 20 70 -0.21627  
 9.50 20 70 -0.28650  
 9.25 20 70 -0.38078  
 9.00 20 70 -0.50700  
 8.75 20 70 -0.67539  
 8.50 20 70 -0.89910  
 8.25 20 70 -1.19498  
 8.00 20 70 -1.58461  
 7.75 20 70 -2.09593  
 7.50 20 70 -2.76580  
 7.25 20 70 -3.64416  
 7.00 20 70 -4.80089  
 6.75 20 70 -6.33617  
 6.50 20 70 -8.39446  
 6.25 20 70 -11.17753

6.00 20 70 -14.94092  
5.75 20 70 -19.92979  
5.50 20 70 -26.15044  
5.25 20 70 -32.75483  
5.00 20 70 -36.59688  
4.75 20 70 -29.13247  
4.50 20 70 9.85342  
4.25 20 70 124.52296  
4.00 20 70 406.72914  
3.75 20 70 1041.43475  
3.50 20 70 2388.88224  
3.25 20 70 5108.71508  
3.00 20 70 8267.05472  
2.75 20 70 9290.02699  
2.50 20 70 9616.20747  
2.25 20 70 9745.62148  
100.00 20 80 -0.00000  
50.00 20 80 -0.00000  
40.00 20 80 -0.00000  
30.00 20 80 -0.00003  
25.00 20 80 -0.00009  
20.00 20 80 -0.00041  
18.00 20 80 -0.00087  
16.00 20 80 -0.00207  
14.00 20 80 -0.00573  
13.00 20 80 -0.01045  
12.00 20 80 -0.02111  
11.00 20 80 -0.04898  
10.50 20 80 -0.07914  
10.00 20 80 -0.13255  
9.75 20 80 -0.17348  
9.50 20 80 -0.22841  
9.25 20 80 -0.30215  
9.00 20 80 -0.40103  
8.75 20 80 -0.53336  
8.50 20 80 -0.70996  
8.25 20 80 -0.94484  
8.00 20 80 -1.25613  
7.75 20 80 -1.66736  
7.50 20 80 -2.20939  
7.25 20 80 -2.92343  
7.00 20 80 -3.86586  
6.75 20 80 -5.11601  
6.50 20 80 -6.78806  
6.25 20 80 -9.04773  
6.00 20 80 -12.13161  
5.75 20 80 -16.35818  
5.50 20 80 -22.09703  
5.25 20 80 -29.60888  
5.00 20 80 -38.54512  
4.75 20 80 -46.61459  
4.50 20 80 -46.28488  
4.25 20 80 -16.91543  
4.00 20 80 93.60341  
3.75 20 80 410.65939  
3.50 20 80 1223.40287  
3.25 20 80 3158.76747  
3.00 20 80 7071.22835  
2.75 20 80 9084.19307  
2.50 20 80 9573.74138  
2.25 20 80 9749.98313  
100.00 20 90 -0.00000  
50.00 20 90 -0.00000  
40.00 20 90 -0.00000  
30.00 20 90 -0.00002  
25.00 20 90 -0.00008  
20.00 20 90 -0.00038  
18.00 20 90 -0.00081  
16.00 20 90 -0.00192  
14.00 20 90 -0.00529  
13.00 20 90 -0.00955  
12.00 20 90 -0.01883  
11.00 20 90 -0.04199  
10.50 20 90 -0.06626  
10.00 20 90 -0.10848  
9.75 20 90 -0.14056  
9.50 20 90 -0.18347  
9.25 20 90 -0.24098  
9.00 20 90 -0.31817  
8.75 20 90 -0.42180  
8.50 20 90 -0.56084  
8.25 20 90 -0.74717  
8.00 20 90 -0.99653  
7.75 20 90 -1.32984  
7.50 20 90 -1.77504  
7.25 20 90 -2.37001  
7.00 20 90 -3.16687  
6.75 20 90 -4.23865  
6.50 20 90 -5.68913  
6.25 20 90 -7.66615  
6.00 20 90 -10.37600  
5.75 20 90 -14.08786  
5.50 20 90 -19.09433  
5.25 20 90 -25.53475  
5.00 20 90 -32.84439  
4.75 20 90 -38.24406  
4.50 20 90 -32.84814  
4.25 20 90 8.05254  
4.00 20 90 148.84137  
3.75 20 90 551.23463  
3.50 20 90 1609.65040  
3.25 20 90 4247.66275  
3.00 20 90 8321.20427

2.75 20 90 9469.21340  
 2.50 20 90 9769.64946  
 2.25 20 90 9887.98075  
 100.00 20 100 -0.00000  
 50.00 20 100 -0.00000  
 40.00 20 100 -0.00000  
 30.00 20 100 -0.00002  
 25.00 20 100 -0.00008  
 20.00 20 100 -0.00038  
 18.00 20 100 -0.00081  
 16.00 20 100 -0.00190  
 14.00 20 100 -0.00517  
 13.00 20 100 -0.00921  
 12.00 20 100 -0.01771  
 11.00 20 100 -0.03793  
 10.50 20 100 -0.05835  
 10.00 20 100 -0.09307  
 9.75 20 100 -0.11912  
 9.50 20 100 -0.15373  
 9.25 20 100 -0.19995  
 9.00 20 100 -0.26190  
 8.75 20 100 -0.34518  
 8.50 20 100 -0.45738  
 8.25 20 100 -0.60879  
 8.00 20 100 -0.81341  
 7.75 20 100 -1.09036  
 7.50 20 100 -1.46588  
 7.25 20 100 -1.97634  
 7.00 20 100 -2.67267  
 6.75 20 100 -3.62677  
 6.50 20 100 -4.94049  
 6.25 20 100 -6.75651  
 6.00 20 100 -9.26732  
 5.75 20 100 -12.70807  
 5.50 20 100 -17.29327  
 5.25 20 100 -22.99174  
 5.00 20 100 -28.87827  
 4.75 20 100 -31.42787  
 4.50 20 100 -20.23014  
 4.25 20 100 32.54524  
 4.00 20 100 197.85301  
 3.75 20 100 652.32264  
 3.50 20 100 1828.69484  
 3.25 20 100 4762.79037  
 3.00 20 100 8608.35875  
 2.75 20 100 9557.96654  
 2.50 20 100 9824.21048  
 2.25 20 100 9925.46417  
 100.00 20 110 -0.00000  
 50.00 20 110 -0.00000  
 40.00 20 110 -0.00000  
 30.00 20 110 -0.00003  
 25.00 20 110 -0.00009  
 20.00 20 110 -0.00043  
 18.00 20 110 -0.00089  
 16.00 20 110 -0.00205  
 14.00 20 110 -0.00548  
 13.00 20 110 -0.00962  
 12.00 20 110 -0.01808  
 11.00 20 110 -0.03730  
 10.50 20 110 -0.05599  
 10.00 20 110 -0.08697  
 9.75 20 110 -0.10984  
 9.50 20 110 -0.13998  
 9.25 20 110 -0.17997  
 9.00 20 110 -0.23335  
 8.75 20 110 -0.30502  
 8.50 20 110 -0.40174  
 8.25 20 110 -0.53287  
 8.00 20 110 -0.71142  
 7.75 20 110 -0.95551  
 7.50 20 110 -1.29057  
 7.25 20 110 -1.75244  
 7.00 20 110 -2.39189  
 6.75 20 110 -3.28111  
 6.50 20 110 -4.52234  
 6.25 20 110 -6.25836  
 6.00 20 110 -8.68096  
 5.75 20 110 -12.02557  
 5.50 20 110 -16.51831  
 5.25 20 110 -22.18972  
 5.00 20 110 -28.34757  
 4.75 20 110 -32.21944  
 4.50 20 110 -25.62696  
 4.25 20 110 12.96594  
 4.00 20 110 137.29941  
 3.75 20 110 477.91985  
 3.50 20 110 1346.92815  
 3.25 20 110 3475.45272  
 3.00 20 110 7651.23638  
 2.75 20 110 9322.94772  
 2.50 20 110 9734.08857  
 2.25 20 110 9884.38113  
 100.00 20 120 -0.00000  
 50.00 20 120 -0.00000  
 40.00 20 120 -0.00001  
 30.00 20 120 -0.00004  
 25.00 20 120 -0.00012  
 20.00 20 120 -0.00052  
 18.00 20 120 -0.00107  
 16.00 20 120 -0.00243  
 14.00 20 120 -0.00637  
 13.00 20 120 -0.01105

12.00 20 120 -0.02040  
 11.00 20 120 -0.04092  
 10.50 20 120 -0.06031  
 10.00 20 120 -0.09181  
 9.75 20 120 -0.11477  
 9.50 20 120 -0.14481  
 9.25 20 120 -0.18448  
 9.00 20 120 -0.23730  
 8.75 20 120 -0.30821  
 8.50 20 120 -0.40413  
 8.25 20 120 -0.53480  
 8.00 20 120 -0.71391  
 7.75 20 120 -0.96084  
 7.50 20 120 -1.30296  
 7.25 20 120 -1.77898  
 7.00 20 120 -2.44368  
 6.75 20 120 -3.37438  
 6.50 20 120 -4.67952  
 6.25 20 120 -6.50915  
 6.00 20 120 -9.06507  
 5.75 20 120 -12.60319  
 5.50 20 120 -17.40742  
 5.25 20 120 -23.68335  
 5.00 20 120 -31.25005  
 4.75 20 120 -38.75278  
 4.50 20 120 -41.78007  
 4.25 20 120 -28.51439  
 4.00 20 120 30.15534  
 3.75 20 120 203.00931  
 3.50 20 120 648.86074  
 3.25 20 120 1726.94998  
 3.00 20 120 4220.44339  
 2.75 20 120 8107.89923  
 2.50 20 120 9372.05111  
 2.25 20 120 9722.76781  
 100.00 20 130 -0.00000  
 50.00 20 130 -0.00000  
 40.00 20 130 -0.00001  
 30.00 20 130 -0.00005  
 25.00 20 130 -0.00015  
 20.00 20 130 -0.00066  
 18.00 20 130 -0.00135  
 16.00 20 130 -0.00306  
 14.00 20 130 -0.00796  
 13.00 20 130 -0.01373  
 12.00 20 130 -0.02518  
 11.00 20 130 -0.05000  
 10.50 20 130 -0.07329  
 10.00 20 130 -0.11100  
 9.75 20 130 -0.13853  
 9.50 20 130 -0.17467  
 9.25 20 130 -0.22260  
 9.00 20 130 -0.28686  
 8.75 20 130 -0.37385  
 8.50 20 130 -0.49265  
 8.25 20 130 -0.65614  
 8.00 20 130 -0.88257  
 7.75 20 130 -1.19765  
 7.50 20 130 -1.63746  
 7.25 20 130 -2.25226  
 7.00 20 130 -3.11155  
 6.75 20 130 -4.31035  
 6.50 20 130 -5.97687  
 6.25 20 130 -8.28053  
 6.00 20 130 -11.43792  
 5.75 20 130 -15.70914  
 5.50 20 130 -21.36683  
 5.25 20 130 -28.59702  
 5.00 20 130 -37.24371  
 4.75 20 130 -46.21692  
 4.50 20 130 -52.20527  
 4.25 20 130 -46.98922  
 4.00 20 130 -11.94305  
 3.75 20 130 93.25151  
 3.50 20 130 354.30727  
 3.25 20 130 953.50043  
 3.00 20 130 2281.43972  
 2.75 20 130 5177.77748  
 2.50 20 130 8539.40836  
 2.25 20 130 9496.99378  
 100.00 20 140 -0.00000  
 50.00 20 140 -0.00000  
 40.00 20 140 -0.00001  
 30.00 20 140 -0.00006  
 25.00 20 140 -0.00019  
 20.00 20 140 -0.00085  
 18.00 20 140 -0.00173  
 16.00 20 140 -0.00393  
 14.00 20 140 -0.01026  
 13.00 20 140 -0.01777  
 12.00 20 140 -0.03274  
 11.00 20 140 -0.06569  
 10.50 20 140 -0.09717  
 10.00 20 140 -0.14923  
 9.75 20 140 -0.18798  
 9.50 20 140 -0.23963  
 9.25 20 140 -0.30932  
 9.00 20 140 -0.40435  
 8.75 20 140 -0.53522  
 8.50 20 140 -0.71683  
 8.25 20 140 -0.97031  
 8.00 20 140 -1.32531  
 7.75 20 140 -1.82299

7.50 20 140 -2.51967  
7.25 20 140 -3.49108  
7.00 20 140 -4.83671  
6.75 20 140 -6.68307  
6.50 20 140 -9.18294  
6.25 20 140 -12.50351  
6.00 20 140 -16.78740  
5.75 20 140 -22.05110  
5.50 20 140 -27.94715  
5.25 20 140 -33.24738  
5.00 20 140 -34.79470  
4.75 20 140 -25.52872  
4.50 20 140 8.93635  
4.25 20 140 95.72586  
4.00 20 140 282.58364  
3.75 20 140 649.11798  
3.50 20 140 1325.32906  
3.25 20 140 2531.15830  
3.00 20 140 4673.36749  
2.75 20 140 7687.88576  
2.50 20 140 9110.80788  
2.25 20 140 9620.20457  
100.00 20 150 -0.00000  
50.00 20 150 -0.00000  
40.00 20 150 -0.00001  
30.00 20 150 -0.00007  
25.00 20 150 -0.00024  
20.00 20 150 -0.00105  
18.00 20 150 -0.00216  
16.00 20 150 -0.00495  
14.00 20 150 -0.01307  
13.00 20 150 -0.02285  
12.00 20 150 -0.04270  
11.00 20 150 -0.08782  
10.50 20 150 -0.13251  
10.00 20 150 -0.20911  
9.75 20 150 -0.26779  
9.50 20 150 -0.34765  
9.25 20 150 -0.45761  
9.00 20 150 -0.61049  
8.75 20 150 -0.82463  
8.50 20 150 -1.12601  
8.25 20 150 -1.55106  
8.00 20 150 -2.14994  
7.75 20 150 -2.99035  
7.50 20 150 -4.16103  
7.25 20 150 -5.77348  
7.00 20 150 -7.95784  
6.75 20 150 -10.84374  
6.50 20 150 -14.50363  
6.25 20 150 -18.80639  
6.00 20 150 -23.06298  
5.75 20 150 -25.20993  
5.50 20 150 -20.02212  
5.25 20 150 4.56286  
5.00 20 150 74.41322  
4.75 20 150 240.98705  
4.50 20 150 598.01344  
4.25 20 150 1298.28265  
4.00 20 150 2557.53812  
3.75 20 150 4631.01288  
3.50 20 150 7285.78375  
3.25 20 150 8697.52128  
3.00 20 150 9290.34404  
2.75 20 150 9593.10582  
2.50 20 150 9765.40869  
2.25 20 150 9861.10615  
100.00 20 160 -0.00000  
50.00 20 160 -0.00000  
40.00 20 160 -0.00001  
30.00 20 160 -0.00008  
25.00 20 160 -0.00028  
20.00 20 160 -0.00124  
18.00 20 160 -0.00257  
16.00 20 160 -0.00594  
14.00 20 160 -0.01591  
13.00 20 160 -0.02810  
12.00 20 160 -0.05342  
11.00 20 160 -0.11313  
10.50 20 160 -0.17467  
10.00 20 160 -0.28394  
9.75 20 160 -0.36988  
9.50 20 160 -0.48894  
9.25 20 160 -0.65558  
9.00 20 160 -0.89054  
8.75 20 160 -1.22340  
8.50 20 160 -1.69569  
8.25 20 160 -2.36463  
8.00 20 160 -3.30705  
7.75 20 160 -4.62238  
7.50 20 160 -6.43153  
7.25 20 160 -8.86428  
7.00 20 160 -12.01611  
6.75 20 160 -15.82689  
6.50 20 160 -19.76324  
6.25 20 160 -22.01893  
6.00 20 160 -17.56851  
5.75 20 160 6.38956  
5.50 20 160 80.58000  
5.25 20 160 274.72893  
5.00 20 160 736.97653  
4.75 20 160 1755.12380  
4.50 20 160 3817.15495

4.25 20 160 7165.47731  
 4.00 20 160 8864.10798  
 3.75 20 160 9396.81852  
 3.50 20 160 9641.79573  
 3.25 20 160 9779.77752  
 3.00 20 160 9861.71445  
 2.75 20 160 9912.01756  
 2.50 20 160 9943.55684  
 2.25 20 160 9963.59858  
 100.00 20 170 -0.00000  
 50.00 20 170 -0.00000  
 40.00 20 170 -0.00001  
 30.00 20 170 -0.00009  
 25.00 20 170 -0.00031  
 20.00 20 170 -0.00138  
 18.00 20 170 -0.00287  
 16.00 20 170 -0.00667  
 14.00 20 170 -0.01806  
 13.00 20 170 -0.03218  
 12.00 20 170 -0.06197  
 11.00 20 170 -0.13434  
 10.50 20 170 -0.21114  
 10.00 20 170 -0.35092  
 9.75 20 170 -0.46275  
 9.50 20 170 -0.61941  
 9.25 20 170 -0.84075  
 9.00 20 170 -1.15529  
 8.75 20 170 -1.60340  
 8.50 20 170 -2.24123  
 8.25 20 170 -3.14491  
 8.00 20 170 -4.41393  
 7.75 20 170 -6.17055  
 7.50 20 170 -8.54718  
 7.25 20 170 -11.64075  
 7.00 20 170 -15.37950  
 6.75 20 170 -19.15936  
 6.50 20 170 -20.88464  
 6.25 20 170 -14.49915  
 6.00 20 170 16.19282  
 5.75 20 170 112.44290  
 5.50 20 170 374.77825  
 5.25 20 170 1035.45632  
 5.00 20 170 2590.55027  
 4.75 20 170 5935.02056  
 4.50 20 170 8709.38956  
 4.25 20 170 9434.23710  
 4.00 20 170 9713.02349  
 3.75 20 170 9846.98885  
 3.50 20 170 9916.25205  
 3.25 20 170 9953.50929  
 3.00 20 170 9973.99021  
 2.75 20 170 9985.38537  
 2.50 20 170 9991.76826  
 2.25 20 170 9995.35711  
 100.00 20 180 -0.00000  
 50.00 20 180 -0.00000  
 40.00 20 180 -0.00002  
 30.00 20 180 -0.00010  
 25.00 20 180 -0.00032  
 20.00 20 180 -0.00143  
 18.00 20 180 -0.00298  
 16.00 20 180 -0.00694  
 14.00 20 180 -0.01887  
 13.00 20 180 -0.03373  
 12.00 20 180 -0.06528  
 11.00 20 180 -0.14278  
 10.50 20 180 -0.22589  
 10.00 20 180 -0.37850  
 9.75 20 180 -0.50131  
 9.50 20 180 -0.67397  
 9.25 20 180 -0.91867  
 9.00 20 180 -1.26723  
 8.75 20 180 -1.76460  
 8.50 20 180 -2.47301  
 8.25 20 180 -3.47627  
 8.00 20 180 -4.88244  
 7.75 20 180 -6.82073  
 7.50 20 180 -9.42105  
 7.25 20 180 -12.74621  
 7.00 20 180 -16.59703  
 6.75 20 180 -19.97982  
 6.50 20 180 -19.68929  
 6.25 20 180 -6.61997  
 6.00 20 180 43.58607  
 5.75 20 180 193.43309  
 5.50 20 180 596.76760  
 5.25 20 180 1611.87193  
 5.00 20 180 4000.39471  
 4.75 20 180 7900.61029  
 4.50 20 180 9253.37450  
 4.25 20 180 9651.45982  
 4.00 20 180 9825.25986  
 3.75 20 180 9909.24976  
 3.50 20 180 9952.01248  
 3.25 20 180 9974.38445  
 3.00 20 180 9986.25794  
 2.75 20 180 9992.60801  
 2.50 20 180 9996.01806  
 2.25 20 180 9997.85334  
 100.00 30 0 -0.00000  
 50.00 30 0 -0.00000  
 40.00 30 0 -0.00001  
 30.00 30 0 -0.00006

25.00 30 0 -0.00019  
 20.00 30 0 -0.00080  
 18.00 30 0 -0.00163  
 16.00 30 0 -0.00374  
 14.00 30 0 -0.01036  
 13.00 30 0 -0.01937  
 12.00 30 0 -0.04112  
 11.00 30 0 -0.10290  
 10.50 30 0 -0.17313  
 10.00 30 0 -0.30114  
 9.75 30 0 -0.40096  
 9.50 30 0 -0.53638  
 9.25 30 0 -0.72011  
 9.00 30 0 -0.96931  
 8.75 30 0 -1.30728  
 8.50 30 0 -1.76604  
 8.25 30 0 -2.39025  
 8.00 30 0 -3.24338  
 7.75 30 0 -4.41703  
 7.50 30 0 -6.04342  
 7.25 30 0 -8.30692  
 7.00 30 0 -11.43608  
 6.75 30 0 -15.61641  
 6.50 30 0 -20.65429  
 6.25 30 0 -24.94782  
 6.00 30 0 -22.66597  
 5.75 30 0 3.45008  
 5.50 30 0 99.48087  
 5.25 30 0 380.41160  
 5.00 30 0 1118.53187  
 4.75 30 0 2931.14102  
 4.50 30 0 6911.09834  
 4.25 30 0 9182.15976  
 4.00 30 0 9719.58977  
 3.75 30 0 9891.57014  
 3.50 30 0 9956.13496  
 3.25 30 0 9981.93370  
 3.00 30 0 9992.50458  
 2.75 30 0 9996.88086  
 2.50 30 0 9998.70037  
 2.25 30 0 9999.45821  
 100.00 30 10 -0.00000  
 50.00 30 10 -0.00000  
 40.00 30 10 -0.00001  
 30.00 30 10 -0.00006  
 25.00 30 10 -0.00019  
 20.00 30 10 -0.00079  
 18.00 30 10 -0.00161  
 16.00 30 10 -0.00369  
 14.00 30 10 -0.01021  
 13.00 30 10 -0.01909  
 12.00 30 10 -0.04054  
 11.00 30 10 -0.10153  
 10.50 30 10 -0.17085  
 10.00 30 10 -0.29699  
 9.75 30 10 -0.39518  
 9.50 30 10 -0.52813  
 9.25 30 10 -0.70804  
 9.00 30 10 -0.95124  
 8.75 30 10 -1.27966  
 8.50 30 10 -1.72300  
 8.25 30 10 -2.32208  
 8.00 30 10 -3.13407  
 7.75 30 10 -4.24056  
 7.50 30 10 -5.75924  
 7.25 30 10 -7.85714  
 7.00 30 10 -10.75517  
 6.75 30 10 -14.68678  
 6.50 30 10 -19.70446  
 6.25 30 10 -25.05429  
 6.00 30 10 -27.43662  
 5.75 30 10 -16.58554  
 5.50 30 10 35.22454  
 5.25 30 10 196.60832  
 5.00 30 10 626.18831  
 4.75 30 10 1668.39009  
 4.50 30 10 4024.44737  
 4.25 30 10 7873.51058  
 4.00 30 10 9302.73898  
 3.75 30 10 9718.35609  
 3.50 30 10 9875.89766  
 3.25 30 10 9943.22962  
 3.00 30 10 9973.58960  
 2.75 30 10 9987.61777  
 2.50 30 10 9994.17366  
 2.25 30 10 9997.25380  
 100.00 30 20 -0.00000  
 50.00 30 20 -0.00000  
 40.00 30 20 -0.00001  
 30.00 30 20 -0.00006  
 25.00 30 20 -0.00018  
 20.00 30 20 -0.00075  
 18.00 30 20 -0.00154  
 16.00 30 20 -0.00355  
 14.00 30 20 -0.00980  
 13.00 30 20 -0.01830  
 12.00 30 20 -0.03891  
 11.00 30 20 -0.09766  
 10.50 30 20 -0.16442  
 10.00 30 20 -0.28556  
 9.75 30 20 -0.37951  
 9.50 30 20 -0.50623  
 9.25 30 20 -0.67682

9.00 30 20 -0.90584  
 8.75 30 20 -1.21239  
 8.50 30 20 -1.62150  
 8.25 30 20 -2.16633  
 8.00 30 20 -2.89158  
 7.75 30 20 -3.85897  
 7.50 30 20 -5.15609  
 7.25 30 20 -6.90961  
 7.00 30 20 -9.30224  
 6.75 30 20 -12.58568  
 6.50 30 20 -17.06167  
 6.25 30 20 -22.95194  
 6.00 30 20 -29.96011  
 5.75 30 20 -36.07600  
 5.50 30 20 -34.67407  
 5.25 30 20 -8.04657  
 5.00 30 20 86.00951  
 4.75 30 20 340.26939  
 4.50 30 20 946.08137  
 4.25 30 20 2279.09329  
 4.00 30 20 5055.28586  
 3.75 30 20 8363.49608  
 3.50 30 20 9398.89972  
 3.25 30 20 9735.91602  
 3.00 30 20 9875.07924  
 2.75 30 20 9939.02813  
 2.50 30 20 9969.78920  
 2.25 30 20 9984.91982  
 100.00 30 30 -0.00000  
 50.00 30 30 -0.00000  
 40.00 30 30 -0.00001  
 30.00 30 30 -0.00005  
 25.00 30 30 -0.00016  
 20.00 30 30 -0.00071  
 18.00 30 30 -0.00144  
 16.00 30 30 -0.00333  
 14.00 30 30 -0.00917  
 13.00 30 30 -0.01712  
 12.00 30 30 -0.03643  
 11.00 30 30 -0.09163  
 10.50 30 30 -0.15438  
 10.00 30 30 -0.26808  
 9.75 30 30 -0.35602  
 9.50 30 30 -0.47431  
 9.25 30 30 -0.63294  
 9.00 30 30 -0.84485  
 8.75 30 30 -1.12664  
 8.50 30 30 -1.49953  
 8.25 30 30 -1.99071  
 8.00 30 30 -2.63549  
 7.75 30 30 -3.48079  
 7.50 30 30 -4.59122  
 7.25 30 30 -6.05926  
 7.00 30 30 -8.02131  
 6.75 30 30 -10.68008  
 6.50 30 30 -14.32736  
 6.25 30 30 -19.34276  
 6.00 30 30 -26.09697  
 5.75 30 30 -34.57721  
 5.50 30 30 -43.30943  
 5.25 30 30 -46.63285  
 5.00 30 30 -28.28797  
 4.75 30 30 53.06030  
 4.50 30 30 295.82057  
 4.25 30 30 925.16011  
 4.00 30 30 2439.71259  
 3.75 30 30 5868.88334  
 3.50 30 30 8832.56126  
 3.25 30 30 9556.73005  
 3.00 30 30 9787.42091  
 2.75 30 30 9890.83953  
 2.50 30 30 9942.69869  
 2.25 30 30 9969.57586  
 100.00 30 40 -0.00000  
 50.00 30 40 -0.00000  
 40.00 30 40 -0.00001  
 30.00 30 40 -0.00005  
 25.00 30 40 -0.00015  
 20.00 30 40 -0.00064  
 18.00 30 40 -0.00132  
 16.00 30 40 -0.00305  
 14.00 30 40 -0.00841  
 13.00 30 40 -0.01567  
 12.00 30 40 -0.03328  
 11.00 30 40 -0.08358  
 10.50 30 40 -0.14074  
 10.00 30 40 -0.24424  
 9.75 30 40 -0.32423  
 9.50 30 40 -0.43174  
 9.25 30 40 -0.57576  
 9.00 30 40 -0.76787  
 8.75 30 40 -1.02283  
 8.50 30 40 -1.35934  
 8.25 30 40 -1.80109  
 8.00 30 40 -2.37837  
 7.75 30 40 -3.13068  
 7.50 30 40 -4.11138  
 7.25 30 40 -5.39535  
 7.00 30 40 -7.09118  
 6.75 30 40 -9.35713  
 6.50 30 40 -12.41404  
 6.25 30 40 -16.52817  
 6.00 30 40 -21.88712

5.75 30 40 -28.17408  
5.50 30 40 -33.38757  
5.25 30 40 -30.91791  
5.00 30 40 -2.81878  
4.75 30 40 94.90093  
4.50 30 40 363.30993  
4.25 30 40 1024.29327  
4.00 30 40 2546.20332  
3.75 30 40 5844.60278  
3.50 30 40 8745.56778  
3.25 30 40 9503.47046  
3.00 30 40 9751.32221  
2.75 30 40 9866.10773  
2.50 30 40 9926.25859  
2.25 30 40 9958.88336  
100.00 30 50 -0.00000  
50.00 30 50 -0.00000  
40.00 30 50 -0.00001  
30.00 30 50 -0.00004  
25.00 30 50 -0.00013  
20.00 30 50 -0.00058  
18.00 30 50 -0.00119  
16.00 30 50 -0.00276  
14.00 30 50 -0.00758  
13.00 30 50 -0.01408  
12.00 30 50 -0.02967  
11.00 30 50 -0.07381  
10.50 30 50 -0.12376  
10.00 30 50 -0.21409  
9.75 30 50 -0.28388  
9.50 30 50 -0.37769  
9.25 30 50 -0.50343  
9.00 30 50 -0.67126  
8.75 30 50 -0.89418  
8.50 30 50 -1.18866  
8.25 30 50 -1.57552  
8.00 30 50 -2.08124  
7.75 30 50 -2.74005  
7.50 30 50 -3.59744  
7.25 30 50 -4.71613  
7.00 30 50 -6.18512  
6.75 30 50 -8.13152  
6.50 30 50 -10.72896  
6.25 30 50 -14.18075  
6.00 30 50 -18.61574  
5.75 30 50 -23.74269  
5.50 30 50 -27.91208  
5.25 30 50 -25.84345  
5.00 30 50 -3.54311  
4.75 30 50 72.37942  
4.50 30 50 276.12254  
4.25 30 50 764.06235  
4.00 30 50 1851.48802  
3.75 30 50 4141.74721  
3.50 30 50 7732.05549  
3.25 30 50 9171.98636  
3.00 30 50 9599.18241  
2.75 30 50 9771.69660  
2.50 30 50 9865.53754  
2.25 30 50 9919.48103  
100.00 30 60 -0.00000  
50.00 30 60 -0.00000  
40.00 30 60 -0.00001  
30.00 30 60 -0.00003  
25.00 30 60 -0.00011  
20.00 30 60 -0.00051  
18.00 30 60 -0.00106  
16.00 30 60 -0.00246  
14.00 30 60 -0.00676  
13.00 30 60 -0.01247  
12.00 30 60 -0.02592  
11.00 30 60 -0.06321  
10.50 30 60 -0.10498  
10.00 30 60 -0.18019  
9.75 30 60 -0.23824  
9.50 30 60 -0.31628  
9.25 30 60 -0.42096  
9.00 30 60 -0.56088  
8.75 30 60 -0.74708  
8.50 30 60 -0.99360  
8.25 30 60 -1.31817  
8.00 30 60 -1.74324  
7.75 30 60 -2.29746  
7.50 30 60 -3.01809  
7.25 30 60 -3.95508  
7.00 30 60 -5.17746  
6.75 30 60 -6.78266  
6.50 30 60 -8.90680  
6.25 30 60 -11.72720  
6.00 30 60 -15.43029  
5.75 30 60 -20.07552  
5.50 30 60 -25.19610  
5.25 30 60 -28.79958  
5.00 30 60 -25.10263  
4.75 30 60 0.24031  
4.50 30 60 79.63465  
4.25 30 60 281.63307  
4.00 30 60 743.98782  
3.75 30 60 1730.04771  
3.50 30 60 3709.63033  
3.25 30 60 7070.54572  
3.00 30 60 8891.39212  
2.75 30 60 9451.06737

2.50 30 60 9673.58333  
 2.25 30 60 9796.82659  
 100.00 30 70 -0.00000  
 50.00 30 70 -0.00000  
 40.00 30 70 -0.00000  
 30.00 30 70 -0.00003  
 25.00 30 70 -0.00010  
 20.00 30 70 -0.00045  
 18.00 30 70 -0.00093  
 16.00 30 70 -0.00219  
 14.00 30 70 -0.00602  
 13.00 30 70 -0.01100  
 12.00 30 70 -0.02242  
 11.00 30 70 -0.05309  
 10.50 30 70 -0.08684  
 10.00 30 70 -0.14710  
 9.75 30 70 -0.19345  
 9.50 30 70 -0.25574  
 9.25 30 70 -0.33931  
 9.00 30 70 -0.45121  
 8.75 30 70 -0.60050  
 8.50 30 70 -0.79880  
 8.25 30 70 -1.06092  
 8.00 30 70 -1.40559  
 7.75 30 70 -1.85659  
 7.50 30 70 -2.44437  
 7.25 30 70 -3.20876  
 7.00 30 70 -4.20320  
 6.75 30 70 -5.50162  
 6.50 30 70 -7.20827  
 6.25 30 70 -9.46960  
 6.00 30 70 -12.48177  
 5.75 30 70 -16.47452  
 5.50 30 70 -21.62168  
 5.25 30 70 -27.76494  
 5.00 30 70 -33.70961  
 4.75 30 70 -35.60197  
 4.50 30 70 -23.42159  
 4.25 30 70 26.28509  
 4.00 30 70 164.95950  
 3.75 30 70 500.00270  
 3.50 30 70 1244.56652  
 3.25 30 70 2792.78353  
 3.00 30 70 5776.68566  
 2.75 30 70 8467.05088  
 2.50 30 70 9299.38019  
 2.25 30 70 9581.71776  
 100.00 30 80 -0.00000  
 50.00 30 80 -0.00000  
 40.00 30 80 -0.00000  
 30.00 30 80 -0.00003  
 25.00 30 80 -0.00009  
 20.00 30 80 -0.00040  
 18.00 30 80 -0.00084  
 16.00 30 80 -0.00198  
 14.00 30 80 -0.00542  
 13.00 30 80 -0.00981  
 12.00 30 80 -0.01956  
 11.00 30 80 -0.04467  
 10.50 30 80 -0.07157  
 10.00 30 80 -0.11898  
 9.75 30 80 -0.15523  
 9.50 30 80 -0.20382  
 9.25 30 80 -0.26899  
 9.00 30 80 -0.35635  
 8.75 30 80 -0.47324  
 8.50 30 80 -0.62920  
 8.25 30 80 -0.83654  
 8.00 30 80 -1.11111  
 7.75 30 80 -1.47324  
 7.50 30 80 -1.94915  
 7.25 30 80 -2.57304  
 7.00 30 80 -3.39042  
 6.75 30 80 -4.46337  
 6.50 30 80 -5.87873  
 6.25 30 80 -7.76003  
 6.00 30 80 -10.28255  
 5.75 30 80 -13.68601  
 5.50 30 80 -18.26639  
 5.25 30 80 -24.29617  
 5.00 30 80 -31.74738  
 4.75 30 80 -39.52459  
 4.50 30 80 -43.54910  
 4.25 30 80 -32.25931  
 4.00 30 80 23.48033  
 3.75 30 80 191.95757  
 3.50 30 80 623.71592  
 3.25 30 80 1627.50177  
 3.00 30 80 3768.38364  
 2.75 30 80 7332.01186  
 2.50 30 80 8961.22387  
 2.25 30 80 9403.46302  
 100.00 30 90 -0.00000  
 50.00 30 90 -0.00000  
 40.00 30 90 -0.00000  
 30.00 30 90 -0.00002  
 25.00 30 90 -0.00008  
 20.00 30 90 -0.00037  
 18.00 30 90 -0.00079  
 16.00 30 90 -0.00185  
 14.00 30 90 -0.00505  
 13.00 30 90 -0.00905  
 12.00 30 90 -0.01762

11.00 30 90 -0.03868  
 10.50 30 90 -0.06050  
 10.00 30 90 -0.09822  
 9.75 30 90 -0.12677  
 9.50 30 90 -0.16488  
 9.25 30 90 -0.21587  
 9.00 30 90 -0.28421  
 8.75 30 90 -0.37583  
 8.50 30 90 -0.49862  
 8.25 30 90 -0.66295  
 8.00 30 90 -0.88250  
 7.75 30 90 -1.17525  
 7.50 30 90 -1.56496  
 7.25 30 90 -2.08325  
 7.00 30 90 -2.77273  
 6.75 30 90 -3.69188  
 6.50 30 90 -4.92218  
 6.25 30 90 -6.57844  
 6.00 30 90 -8.82159  
 5.75 30 90 -11.86957  
 5.50 30 90 -15.98976  
 5.25 30 90 -21.42708  
 5.00 30 90 -28.14889  
 4.75 30 90 -35.11962  
 4.50 30 90 -38.43568  
 4.25 30 90 -26.80770  
 4.00 30 90 28.92439  
 3.75 30 90 199.15365  
 3.50 30 90 644.76118  
 3.25 30 90 1710.95277  
 3.00 30 90 4067.92685  
 2.75 30 90 7771.00260  
 2.50 30 90 9156.72959  
 2.25 30 90 9531.47825  
 100.00 30 100 -0.00000  
 50.00 30 100 -0.00000  
 40.00 30 100 -0.00000  
 30.00 30 100 -0.00002  
 25.00 30 100 -0.00008  
 20.00 30 100 -0.00038  
 18.00 30 100 -0.00079  
 16.00 30 100 -0.00186  
 14.00 30 100 -0.00500  
 13.00 30 100 -0.00884  
 12.00 30 100 -0.01684  
 11.00 30 100 -0.03553  
 10.50 30 100 -0.05419  
 10.00 30 100 -0.08566  
 9.75 30 100 -0.10916  
 9.50 30 100 -0.14028  
 9.25 30 100 -0.18171  
 9.00 30 100 -0.23709  
 8.75 30 100 -0.31135  
 8.50 30 100 -0.41114  
 8.25 30 100 -0.54544  
 8.00 30 100 -0.72639  
 7.75 30 100 -0.97040  
 7.50 30 100 -1.29973  
 7.25 30 100 -1.74480  
 7.00 30 100 -2.34753  
 6.75 30 100 -3.16618  
 6.50 30 100 -4.28233  
 6.25 30 100 -5.81022  
 6.00 30 100 -7.90737  
 5.75 30 100 -10.78095  
 5.50 30 100 -14.67257  
 5.25 30 100 -19.77409  
 5.00 30 100 -25.95587  
 4.75 30 100 -32.02479  
 4.50 30 100 -33.85696  
 4.25 30 100 -19.92036  
 4.00 30 100 39.12224  
 3.75 30 100 213.89645  
 3.50 30 100 667.38936  
 3.25 30 100 1758.20144  
 3.00 30 100 4217.10287  
 2.75 30 100 7980.64123  
 2.50 30 100 9270.54005  
 2.25 30 100 9628.87237  
 100.00 30 110 -0.00000  
 50.00 30 110 -0.00000  
 40.00 30 110 -0.00000  
 30.00 30 110 -0.00003  
 25.00 30 110 -0.00009  
 20.00 30 110 -0.00043  
 18.00 30 110 -0.00088  
 16.00 30 110 -0.00203  
 14.00 30 110 -0.00538  
 13.00 30 110 -0.00939  
 12.00 30 110 -0.01751  
 11.00 30 110 -0.03568  
 10.50 30 110 -0.05317  
 10.00 30 110 -0.08192  
 9.75 30 110 -0.10303  
 9.50 30 110 -0.13074  
 9.25 30 110 -0.16737  
 9.00 30 110 -0.21610  
 8.75 30 110 -0.28132  
 8.50 30 110 -0.36905  
 8.25 30 110 -0.48760  
 8.00 30 110 -0.64844  
 7.75 30 110 -0.86744  
 7.50 30 110 -1.16666

7.25 30 110 -1.57685  
7.00 30 110 -2.14108  
6.75 30 110 -2.91983  
6.50 30 110 -3.99816  
6.25 30 110 -5.49485  
6.00 30 110 -7.57272  
5.75 30 110 -10.44493  
5.50 30 110 -14.36270  
5.25 30 110 -19.54523  
5.00 30 110 -25.95667  
4.75 30 110 -32.70799  
4.50 30 110 -36.57980  
4.25 30 110 -28.54152  
4.00 30 110 14.22176  
3.75 30 110 146.20081  
3.50 30 110 492.69941  
3.25 30 110 1331.17477  
3.00 30 110 3241.83129  
2.75 30 110 7002.68530  
2.50 30 110 9039.46559  
2.25 30 110 9572.91465  
100.00 30 120 -0.00000  
50.00 30 120 -0.00000  
40.00 30 120 -0.00001  
30.00 30 120 -0.00004  
25.00 30 120 -0.00012  
20.00 30 120 -0.00052  
18.00 30 120 -0.00107  
16.00 30 120 -0.00243  
14.00 30 120 -0.00633  
13.00 30 120 -0.01094  
12.00 30 120 -0.02008  
11.00 30 120 -0.03995  
10.50 30 120 -0.05859  
10.00 30 120 -0.08865  
9.75 30 120 -0.11047  
9.50 30 120 -0.13894  
9.25 30 120 -0.17642  
9.00 30 120 -0.22618  
8.75 30 120 -0.29281  
8.50 30 120 -0.38272  
8.25 30 120 -0.50488  
8.00 30 120 -0.67191  
7.75 30 120 -0.90155  
7.50 30 120 -1.21873  
7.25 30 120 -1.65847  
7.00 30 120 -2.26995  
6.75 30 120 -3.12198  
6.50 30 120 -4.31038  
6.25 30 120 -5.96722  
6.00 30 120 -8.27120  
5.75 30 120 -11.45533  
5.50 30 120 -15.80152  
5.25 30 120 -21.59508  
5.00 30 120 -28.97538  
4.75 30 120 -37.53937  
4.50 30 120 -45.38397  
4.25 30 120 -46.91048  
4.00 30 120 -27.93202  
3.75 30 120 45.07529  
3.50 30 120 248.36967  
3.25 30 120 750.93412  
3.00 30 120 1916.39282  
2.75 30 120 4492.14989  
2.50 30 120 8170.64855  
2.25 30 120 9366.89609  
100.00 30 130 -0.00000  
50.00 30 130 -0.00000  
40.00 30 130 -0.00001  
30.00 30 130 -0.00005  
25.00 30 130 -0.00015  
20.00 30 130 -0.00067  
18.00 30 130 -0.00136  
16.00 30 130 -0.00308  
14.00 30 130 -0.00796  
13.00 30 130 -0.01371  
12.00 30 130 -0.02505  
11.00 30 130 -0.04953  
10.50 30 130 -0.07238  
10.00 30 130 -0.10927  
9.75 30 130 -0.13613  
9.50 30 130 -0.17134  
9.25 30 130 -0.21798  
9.00 30 130 -0.28041  
8.75 30 130 -0.36483  
8.50 30 130 -0.47999  
8.25 30 130 -0.63832  
8.00 30 130 -0.85737  
7.75 30 130 -1.16186  
7.50 30 130 -1.58633  
7.25 30 130 -2.17880  
7.00 30 130 -3.00530  
6.75 30 130 -4.15562  
6.50 30 130 -5.75015  
6.25 30 130 -7.94687  
6.00 30 130 -10.94659  
5.75 30 130 -14.99019  
5.50 30 130 -20.33377  
5.25 30 130 -27.16984  
5.00 30 130 -35.42727  
4.75 30 130 -44.31538  
4.50 30 130 -51.35330  
4.25 30 130 -50.39717

4.00 30 130 -27.72992  
 3.75 30 130 45.69424  
 3.50 30 130 230.09395  
 3.25 30 130 650.87214  
 3.00 30 130 1575.36144  
 2.75 30 130 3592.48004  
 2.50 30 130 7429.67928  
 2.25 30 130 9241.67813  
 100.00 30 140 -0.00000  
 50.00 30 140 -0.00000  
 40.00 30 140 -0.00001  
 30.00 30 140 -0.00006  
 25.00 30 140 -0.00019  
 20.00 30 140 -0.00085  
 18.00 30 140 -0.00174  
 16.00 30 140 -0.00395  
 14.00 30 140 -0.01029  
 13.00 30 140 -0.01779  
 12.00 30 140 -0.03274  
 11.00 30 140 -0.06553  
 10.50 30 140 -0.09680  
 10.00 30 140 -0.14845  
 9.75 30 140 -0.18686  
 9.50 30 140 -0.23803  
 9.25 30 140 -0.30704  
 9.00 30 140 -0.40111  
 8.75 30 140 -0.53061  
 8.50 30 140 -0.71028  
 8.25 30 140 -0.96099  
 8.00 30 140 -1.31201  
 7.75 30 140 -1.80397  
 7.50 30 140 -2.49236  
 7.25 30 140 -3.45171  
 7.00 30 140 -4.77967  
 6.75 30 140 -6.59997  
 6.50 30 140 -9.06122  
 6.25 30 140 -12.32442  
 6.00 30 140 -16.52317  
 5.75 30 140 -21.66157  
 5.50 30 140 -27.37683  
 5.25 30 140 -32.42599  
 5.00 30 140 -33.64949  
 4.75 30 140 -24.02723  
 4.50 30 140 10.67191  
 4.25 30 140 97.14502  
 4.00 30 140 282.08677  
 3.75 30 140 642.66599  
 3.50 30 140 1303.27883  
 3.25 30 140 2470.81715  
 3.00 30 140 4520.91632  
 2.75 30 140 7512.75082  
 2.50 30 140 9035.63892  
 2.25 30 140 9585.46949  
 100.00 30 150 -0.00000  
 50.00 30 150 -0.00000  
 40.00 30 150 -0.00001  
 30.00 30 150 -0.00007  
 25.00 30 150 -0.00024  
 20.00 30 150 -0.00105  
 18.00 30 150 -0.00217  
 16.00 30 150 -0.00497  
 14.00 30 150 -0.01310  
 13.00 30 150 -0.02288  
 12.00 30 150 -0.04274  
 11.00 30 150 -0.08781  
 10.50 30 150 -0.13243  
 10.00 30 150 -0.20886  
 9.75 30 150 -0.26739  
 9.50 30 150 -0.34705  
 9.25 30 150 -0.45671  
 9.00 30 150 -0.60916  
 8.75 30 150 -0.82268  
 8.50 30 150 -1.12318  
 8.25 30 150 -1.54695  
 8.00 30 150 -2.14399  
 7.75 30 150 -2.98174  
 7.50 30 150 -4.14857  
 7.25 30 150 -5.75538  
 7.00 30 150 -7.93146  
 6.75 30 150 -10.80516  
 6.50 30 150 -14.44694  
 6.25 30 150 -18.72267  
 6.00 30 150 -22.93874  
 5.75 30 150 -25.02479  
 5.50 30 150 -19.74550  
 5.25 30 150 4.97634  
 5.00 30 150 75.02950  
 4.75 30 150 241.89885  
 4.50 30 150 599.34437  
 4.25 30 150 1300.18147  
 4.00 30 150 2560.14159  
 3.75 30 150 4634.31112  
 3.50 30 150 7287.70289  
 3.25 30 150 8697.63910  
 3.00 30 150 9289.75958  
 2.75 30 150 9592.13913  
 2.50 30 150 9764.33731  
 2.25 30 150 9860.17995  
 100.00 30 160 -0.00000  
 50.00 30 160 -0.00000  
 40.00 30 160 -0.00001  
 30.00 30 160 -0.00008  
 25.00 30 160 -0.00028

20.00 30 160 -0.00124  
 18.00 30 160 -0.00258  
 16.00 30 160 -0.00595  
 14.00 30 160 -0.01592  
 13.00 30 160 -0.02813  
 12.00 30 160 -0.05345  
 11.00 30 160 -0.11316  
 10.50 30 160 -0.17468  
 10.00 30 160 -0.28390  
 9.75 30 160 -0.36980  
 9.50 30 160 -0.48880  
 9.25 30 160 -0.65533  
 9.00 30 160 -0.89014  
 8.75 30 160 -1.22279  
 8.50 30 160 -1.69477  
 8.25 30 160 -2.36325  
 8.00 30 160 -3.30501  
 7.75 30 160 -4.61936  
 7.50 30 160 -6.42708  
 7.25 30 160 -8.85772  
 7.00 30 160 -12.00641  
 6.75 30 160 -15.81249  
 6.50 30 160 -19.74171  
 6.25 30 160 -21.98640  
 6.00 30 160 -17.51868  
 5.75 30 160 6.46740  
 5.50 30 160 80.70470  
 5.25 30 160 274.93481  
 5.00 30 160 737.32746  
 4.75 30 160 1755.73810  
 4.50 30 160 3818.24290  
 4.25 30 160 7166.62725  
 4.00 30 160 8864.49956  
 3.75 30 160 9397.00790  
 3.50 30 160 9641.91586  
 3.25 30 160 9779.85720  
 3.00 30 160 9861.76866  
 2.75 30 160 9912.05495  
 2.50 30 160 9943.58280  
 2.25 30 160 9963.61664  
 100.00 30 170 -0.00000  
 50.00 30 170 -0.00000  
 40.00 30 170 -0.00001  
 30.00 30 170 -0.00009  
 25.00 30 170 -0.00031  
 20.00 30 170 -0.00138  
 18.00 30 170 -0.00287  
 16.00 30 170 -0.00667  
 14.00 30 170 -0.01806  
 13.00 30 170 -0.03219  
 12.00 30 170 -0.06198  
 11.00 30 170 -0.13435  
 10.50 30 170 -0.21115  
 10.00 30 170 -0.35092  
 9.75 30 170 -0.46275  
 9.50 30 170 -0.61939  
 9.25 30 170 -0.84072  
 9.00 30 170 -1.15523  
 8.75 30 170 -1.60330  
 8.50 30 170 -2.24107  
 8.25 30 170 -3.14466  
 8.00 30 170 -4.41355  
 7.75 30 170 -6.16997  
 7.50 30 170 -8.54629  
 7.25 30 170 -11.63941  
 7.00 30 170 -15.37744  
 6.75 30 170 -19.15617  
 6.50 30 170 -20.87956  
 6.25 30 170 -14.49077  
 6.00 30 170 16.20741  
 5.75 30 170 112.46988  
 5.50 30 170 374.83147  
 5.25 30 170 1035.56677  
 5.00 30 170 2590.78493  
 4.75 30 170 5935.46883  
 4.50 30 170 8709.53590  
 4.25 30 170 9434.29077  
 4.00 30 170 9713.05160  
 3.75 30 170 9847.00478  
 3.50 30 170 9916.26142  
 3.25 30 170 9953.51492  
 3.00 30 170 9973.99361  
 2.75 30 170 9985.38743  
 2.50 30 170 9991.76950  
 2.25 30 170 9995.35786  
 100.00 30 180 -0.00000  
 50.00 30 180 -0.00000  
 40.00 30 180 -0.00002  
 30.00 30 180 -0.00010  
 25.00 30 180 -0.00032  
 20.00 30 180 -0.00143  
 18.00 30 180 -0.00298  
 16.00 30 180 -0.00694  
 14.00 30 180 -0.01887  
 13.00 30 180 -0.03373  
 12.00 30 180 -0.06528  
 11.00 30 180 -0.14278  
 10.50 30 180 -0.22589  
 10.00 30 180 -0.37850  
 9.75 30 180 -0.50131  
 9.50 30 180 -0.67397  
 9.25 30 180 -0.91867  
 9.00 30 180 -1.26723

8.75 30 180 -1.76460  
8.50 30 180 -2.47301  
8.25 30 180 -3.47627  
8.00 30 180 -4.88244  
7.75 30 180 -6.82073  
7.50 30 180 -9.42105  
7.25 30 180 -12.74621  
7.00 30 180 -16.59703  
6.75 30 180 -19.97982  
6.50 30 180 -19.68929  
6.25 30 180 -6.61997  
6.00 30 180 43.58607  
5.75 30 180 193.43309  
5.50 30 180 596.76760  
5.25 30 180 1611.87193  
5.00 30 180 4000.39471  
4.75 30 180 7900.61029  
4.50 30 180 9253.37450  
4.25 30 180 9651.45982  
4.00 30 180 9825.25986  
3.75 30 180 9909.24976  
3.50 30 180 9952.01248  
3.25 30 180 9974.38445  
3.00 30 180 9986.25794  
2.75 30 180 9992.60801  
2.50 30 180 9996.01806  
2.25 30 180 9997.85334  
100.00 40 0 -0.00000  
50.00 40 0 -0.00000  
40.00 40 0 -0.00001  
30.00 40 0 -0.00006  
25.00 40 0 -0.00019  
20.00 40 0 -0.00080  
18.00 40 0 -0.00163  
16.00 40 0 -0.00374  
14.00 40 0 -0.01036  
13.00 40 0 -0.01937  
12.00 40 0 -0.04112  
11.00 40 0 -0.10290  
10.50 40 0 -0.17313  
10.00 40 0 -0.30114  
9.75 40 0 -0.40096  
9.50 40 0 -0.53638  
9.25 40 0 -0.72011  
9.00 40 0 -0.96931  
8.75 40 0 -1.30728  
8.50 40 0 -1.76604  
8.25 40 0 -2.39025  
8.00 40 0 -3.24338  
7.75 40 0 -4.41703  
7.50 40 0 -6.04342  
7.25 40 0 -8.30692  
7.00 40 0 -11.43608  
6.75 40 0 -15.61641  
6.50 40 0 -20.65429  
6.25 40 0 -24.94782  
6.00 40 0 -22.66597  
5.75 40 0 3.45008  
5.50 40 0 99.48087  
5.25 40 0 380.41160  
5.00 40 0 1118.53187  
4.75 40 0 2931.14102  
4.50 40 0 6911.09834  
4.25 40 0 9182.15976  
4.00 40 0 9719.58977  
3.75 40 0 9891.57014  
3.50 40 0 9956.13496  
3.25 40 0 9981.93370  
3.00 40 0 9992.50458  
2.75 40 0 9996.88086  
2.50 40 0 9998.70037  
2.25 40 0 9999.45821  
100.00 40 10 -0.00000  
50.00 40 10 -0.00000  
40.00 40 10 -0.00001  
30.00 40 10 -0.00006  
25.00 40 10 -0.00018  
20.00 40 10 -0.00078  
18.00 40 10 -0.00160  
16.00 40 10 -0.00368  
14.00 40 10 -0.01018  
13.00 40 10 -0.01902  
12.00 40 10 -0.04036  
11.00 40 10 -0.10094  
10.50 40 10 -0.16977  
10.00 40 10 -0.29501  
9.75 40 10 -0.39250  
9.50 40 10 -0.52453  
9.25 40 10 -0.70322  
9.00 40 10 -0.94484  
8.75 40 10 -1.27122  
8.50 40 10 -1.71194  
8.25 40 10 -2.30768  
8.00 40 10 -3.11541  
7.75 40 10 -4.21640  
7.50 40 10 -5.72777  
7.25 40 10 -7.81547  
7.00 40 10 -10.69821  
6.75 40 10 -14.60502  
6.50 40 10 -19.57910  
6.25 40 10 -24.84716  
6.00 40 10 -27.06881  
5.75 40 10 -15.89266

5.50 40 10 36.58334  
5.25 40 10 199.32431  
5.00 40 10 631.59551  
4.75 40 10 1678.81086  
4.50 40 10 4043.03898  
4.25 40 10 7884.14161  
4.00 40 10 9303.83006  
3.75 40 10 9718.08752  
3.50 40 10 9875.51809  
3.25 40 10 9942.94183  
3.00 40 10 9973.40276  
2.75 40 10 9987.50516  
2.50 40 10 9994.10881  
2.25 40 10 9997.21761  
100.00 40 20 -0.00000  
50.00 40 20 -0.00000  
40.00 40 20 -0.00001  
30.00 40 20 -0.00006  
25.00 40 20 -0.00018  
20.00 40 20 -0.00075  
18.00 40 20 -0.00153  
16.00 40 20 -0.00352  
14.00 40 20 -0.00968  
13.00 40 20 -0.01805  
12.00 40 20 -0.03823  
11.00 40 20 -0.09551  
10.50 40 20 -0.16048  
10.00 40 20 -0.27834  
9.75 40 20 -0.36975  
9.50 40 20 -0.49309  
9.25 40 20 -0.65922  
9.00 40 20 -0.88240  
8.75 40 20 -1.18136  
8.50 40 20 -1.58066  
8.25 40 20 -2.11288  
8.00 40 20 -2.82183  
7.75 40 20 -3.76785  
7.50 40 20 -5.03618  
7.25 40 20 -6.74923  
7.00 40 20 -9.08176  
6.75 40 20 -12.27070  
6.50 40 20 -16.59044  
6.25 40 20 -22.21308  
6.00 40 20 -28.75386  
5.75 40 20 -34.05062  
5.50 40 20 -31.23232  
5.25 40 20 -2.25004  
5.00 40 20 95.36320  
4.75 40 20 353.67505  
4.50 40 20 958.91984  
4.25 40 20 2265.76404  
4.00 40 20 4919.10275  
3.75 40 20 8215.05984  
3.50 40 20 9325.58027  
3.25 40 20 9694.81519  
3.00 40 20 9851.34436  
2.75 40 20 9925.12343  
2.50 40 20 9961.65395  
2.25 40 20 9980.19602  
100.00 40 30 -0.00000  
50.00 40 30 -0.00000  
40.00 40 30 -0.00001  
30.00 40 30 -0.00005  
25.00 40 30 -0.00016  
20.00 40 30 -0.00070  
18.00 40 30 -0.00142  
16.00 40 30 -0.00326  
14.00 40 30 -0.00895  
13.00 40 30 -0.01663  
12.00 40 30 -0.03511  
11.00 40 30 -0.08751  
10.50 40 30 -0.14685  
10.00 40 30 -0.25425  
9.75 40 30 -0.33733  
9.50 40 30 -0.44911  
9.25 40 30 -0.59910  
9.00 40 30 -0.79964  
8.75 40 30 -1.06655  
8.50 40 30 -1.42001  
8.25 40 30 -1.88587  
8.00 40 30 -2.49739  
7.75 40 30 -3.29829  
7.50 40 30 -4.34780  
7.25 40 30 -5.72910  
7.00 40 30 -7.56270  
6.75 40 30 -10.02518  
6.50 40 30 -13.36908  
6.25 40 30 -17.92549  
6.00 40 30 -24.03551  
5.75 40 30 -31.77422  
5.50 40 30 -40.15318  
5.25 40 30 -45.11637  
5.00 40 30 -34.88623  
4.75 40 30 20.33873  
4.50 40 30 190.53096  
4.25 40 30 632.35940  
4.00 40 30 1683.19685  
3.75 40 30 4033.61120  
3.50 40 30 7849.62771  
3.25 40 30 9262.27532  
3.00 40 30 9658.34813  
2.75 40 30 9814.48054  
2.50 40 30 9896.01282

2.25 40 30 9940.78231  
 100.00 40 40 -0.00000  
 50.00 40 40 -0.00000  
 40.00 40 40 -0.00001  
 30.00 40 40 -0.00005  
 25.00 40 40 -0.00015  
 20.00 40 40 -0.00063  
 18.00 40 40 -0.00129  
 16.00 40 40 -0.00296  
 14.00 40 40 -0.00809  
 13.00 40 40 -0.01496  
 12.00 40 40 -0.03140  
 11.00 40 40 -0.07778  
 10.50 40 40 -0.13018  
 10.00 40 40 -0.22487  
 9.75 40 40 -0.29803  
 9.50 40 40 -0.39637  
 9.25 40 40 -0.52818  
 9.00 40 40 -0.70412  
 8.75 40 40 -0.93777  
 8.50 40 40 -1.24628  
 8.25 40 40 -1.65116  
 8.00 40 40 -2.17947  
 7.75 40 40 -2.86568  
 7.50 40 40 -3.75473  
 7.25 40 40 -4.90749  
 7.00 40 40 -6.40951  
 6.75 40 40 -8.38413  
 6.50 40 40 -11.00789  
 6.25 40 40 -14.51760  
 6.00 40 40 -19.17497  
 5.75 40 40 -25.09854  
 5.50 40 40 -31.74630  
 5.25 40 40 -36.56387  
 5.00 40 40 -31.75726  
 4.75 40 40 2.96829  
 4.50 40 40 116.04617  
 4.25 40 40 416.35484  
 4.00 40 40 1136.05721  
 3.75 40 40 2738.81595  
 3.50 40 40 6019.84878  
 3.25 40 40 8690.70765  
 3.00 40 40 9427.17509  
 2.75 40 40 9685.02124  
 2.50 40 40 9817.06049  
 2.25 40 40 9891.31127  
 100.00 40 50 -0.00000  
 50.00 40 50 -0.00000  
 40.00 40 50 -0.00001  
 30.00 40 50 -0.00004  
 25.00 40 50 -0.00013  
 20.00 40 50 -0.00056  
 18.00 40 50 -0.00115  
 16.00 40 50 -0.00264  
 14.00 40 50 -0.00719  
 13.00 40 50 -0.01323  
 12.00 40 50 -0.02747  
 11.00 40 50 -0.06715  
 10.50 40 50 -0.11171  
 10.00 40 50 -0.19205  
 9.75 40 50 -0.25409  
 9.50 40 50 -0.33747  
 9.25 40 50 -0.44927  
 9.00 40 50 -0.59860  
 8.75 40 50 -0.79705  
 8.50 40 50 -1.05927  
 8.25 40 50 -1.40359  
 8.00 40 50 -1.85287  
 7.75 40 50 -2.43577  
 7.50 40 50 -3.18886  
 7.25 40 50 -4.16008  
 7.00 40 50 -5.41452  
 6.75 40 50 -7.04300  
 6.50 40 50 -9.17225  
 6.25 40 50 -11.96983  
 6.00 40 50 -15.62159  
 5.75 40 50 -20.22261  
 5.50 40 50 -25.44190  
 5.25 40 50 -29.65290  
 5.00 40 50 -27.88702  
 4.75 40 50 -7.32917  
 4.50 40 50 62.10177  
 4.25 40 50 246.55500  
 4.00 40 50 683.66257  
 3.75 40 50 1642.65166  
 3.50 40 50 3604.27591  
 3.25 40 50 6990.03901  
 3.00 40 50 8858.94211  
 2.75 40 50 9422.18058  
 2.50 40 50 9651.72477  
 2.25 40 50 9782.47382  
 100.00 40 60 -0.00000  
 50.00 40 60 -0.00000  
 40.00 40 60 -0.00001  
 30.00 40 60 -0.00003  
 25.00 40 60 -0.00011  
 20.00 40 60 -0.00049  
 18.00 40 60 -0.00101  
 16.00 40 60 -0.00233  
 14.00 40 60 -0.00635  
 13.00 40 60 -0.01159  
 12.00 40 60 -0.02369  
 11.00 40 60 -0.05663

10.50 40 60 -0.09319  
10.00 40 60 -0.15876  
9.75 40 60 -0.20930  
9.50 40 60 -0.27724  
9.25 40 60 -0.36838  
9.00 40 60 -0.49030  
8.75 40 60 -0.65266  
8.50 40 60 -0.86777  
8.25 40 60 -1.15105  
8.00 40 60 -1.52179  
7.75 40 60 -2.00403  
7.50 40 60 -2.62796  
7.25 40 60 -3.43228  
7.00 40 60 -4.46793  
6.75 40 60 -5.80401  
6.50 40 60 -7.53586  
6.25 40 60 -9.79310  
6.00 40 60 -12.73853  
5.75 40 60 -16.53233  
5.50 40 60 -21.19846  
5.25 40 60 -26.25216  
5.00 40 60 -29.79053  
4.75 40 60 -26.44833  
4.50 40 60 -3.06678  
4.25 40 60 70.04424  
4.00 40 60 255.84457  
3.75 40 60 680.30462  
3.50 40 60 1578.37377  
3.25 40 60 3345.43624  
3.00 40 60 6437.73875  
2.75 40 60 8600.71104  
2.50 40 60 9304.97513  
2.25 40 60 9586.97282  
100.00 40 70 -0.00000  
50.00 40 70 -0.00000  
40.00 40 70 -0.00000  
30.00 40 70 -0.00003  
25.00 40 70 -0.00009  
20.00 40 70 -0.00043  
18.00 40 70 -0.00089  
16.00 40 70 -0.00207  
14.00 40 70 -0.00562  
13.00 40 70 -0.01017  
12.00 40 70 -0.02040  
11.00 40 70 -0.04730  
10.50 40 70 -0.07656  
10.00 40 70 -0.12855  
9.75 40 70 -0.16846  
9.50 40 70 -0.22205  
9.25 40 70 -0.29396  
9.00 40 70 -0.39028  
8.75 40 70 -0.51888  
8.50 40 70 -0.68989  
8.25 40 70 -0.91613  
8.00 40 70 -1.21378  
7.75 40 70 -1.60312  
7.50 40 70 -2.10961  
7.25 40 70 -2.76554  
7.00 40 70 -3.61269  
6.75 40 70 -4.70652  
6.50 40 70 -6.12271  
6.25 40 70 -7.96615  
6.00 40 70 -10.38032  
5.75 40 70 -13.54956  
5.50 40 70 -17.67156  
5.25 40 70 -22.84535  
5.00 40 70 -28.74972  
4.75 40 70 -33.84317  
4.50 40 70 -33.52958  
4.25 40 70 -16.18502  
4.00 40 70 45.03675  
3.75 40 70 208.21548  
3.50 40 70 591.71278  
3.25 40 70 1421.11083  
3.00 40 70 3091.00430  
2.75 40 70 6159.71595  
2.50 40 70 8565.49823  
2.25 40 70 9328.83686  
100.00 40 80 -0.00000  
50.00 40 80 -0.00000  
40.00 40 80 -0.00000  
30.00 40 80 -0.00002  
25.00 40 80 -0.00008  
20.00 40 80 -0.00038  
18.00 40 80 -0.00080  
16.00 40 80 -0.00187  
14.00 40 80 -0.00508  
13.00 40 80 -0.00911  
12.00 40 80 -0.01787  
11.00 40 80 -0.03996  
10.50 40 80 -0.06332  
10.00 40 80 -0.10420  
9.75 40 80 -0.13536  
9.50 40 80 -0.17706  
9.25 40 80 -0.23295  
9.00 40 80 -0.30784  
8.75 40 80 -0.40806  
8.50 40 80 -0.54184  
8.25 40 80 -0.71981  
8.00 40 80 -0.95562  
7.75 40 80 -1.26666  
7.50 40 80 -1.67509  
7.25 40 80 -2.20934

7.00 40 80 -2.90627  
 6.75 40 80 -3.81463  
 6.50 40 80 -5.00051  
 6.25 40 80 -6.55543  
 6.00 40 80 -8.60737  
 5.75 40 80 -11.33238  
 5.50 40 80 -14.95771  
 5.25 40 80 -19.72951  
 5.00 40 80 -25.77663  
 4.75 40 80 -32.70884  
 4.50 40 80 -38.58821  
 4.25 40 80 -37.50328  
 4.00 40 80 -14.18631  
 3.75 40 80 67.27515  
 3.50 40 80 285.63191  
 3.25 40 80 802.37492  
 3.00 40 80 1923.35422  
 2.75 40 80 4164.82610  
 2.50 40 80 7525.50694  
 2.25 40 80 8990.71270  
 100.00 40 90 -0.00000  
 50.00 40 90 -0.00000  
 40.00 40 90 -0.00000  
 30.00 40 90 -0.00002  
 25.00 40 90 -0.00008  
 20.00 40 90 -0.00036  
 18.00 40 90 -0.00076  
 16.00 40 90 -0.00178  
 14.00 40 90 -0.00479  
 13.00 40 90 -0.00849  
 12.00 40 90 -0.01630  
 11.00 40 90 -0.03507  
 10.50 40 90 -0.05425  
 10.00 40 90 -0.08709  
 9.75 40 90 -0.11183  
 9.50 40 90 -0.14476  
 9.25 40 90 -0.18872  
 9.00 40 90 -0.24755  
 8.75 40 90 -0.32633  
 8.50 40 90 -0.43181  
 8.25 40 90 -0.57288  
 8.00 40 90 -0.76122  
 7.75 40 90 -1.01209  
 7.50 40 90 -1.34543  
 7.25 40 90 -1.78743  
 7.00 40 90 -2.37272  
 6.75 40 90 -3.14771  
 6.50 40 90 -4.17558  
 6.25 40 90 -5.54360  
 6.00 40 90 -7.37314  
 5.75 40 90 -9.83089  
 5.50 40 90 -13.13466  
 5.25 40 90 -17.53289  
 5.00 40 90 -23.20240  
 4.75 40 90 -29.92975  
 4.50 40 90 -36.26712  
 4.25 40 90 -37.48944  
 4.00 40 90 -20.95800  
 3.75 40 90 43.81980  
 3.50 40 90 225.20503  
 3.25 40 90 666.36984  
 3.00 40 90 1643.83951  
 2.75 40 90 3631.17000  
 2.50 40 90 6977.77821  
 2.25 40 90 8808.24868  
 100.00 40 100 -0.00000  
 50.00 40 100 -0.00000  
 40.00 40 100 -0.00000  
 30.00 40 100 -0.00002  
 25.00 40 100 -0.00008  
 20.00 40 100 -0.00037  
 18.00 40 100 -0.00078  
 16.00 40 100 -0.00181  
 14.00 40 100 -0.00482  
 13.00 40 100 -0.00845  
 12.00 40 100 -0.01588  
 11.00 40 100 -0.03292  
 10.50 40 100 -0.04968  
 10.00 40 100 -0.07766  
 9.75 40 100 -0.09840  
 9.50 40 100 -0.12577  
 9.25 40 100 -0.16207  
 9.00 40 100 -0.21045  
 8.75 40 100 -0.27515  
 8.50 40 100 -0.36187  
 8.25 40 100 -0.47831  
 8.00 40 100 -0.63483  
 7.75 40 100 -0.84532  
 7.50 40 100 -1.12847  
 7.25 40 100 -1.50950  
 7.00 40 100 -2.02259  
 6.75 40 100 -2.71448  
 6.50 40 100 -3.64950  
 6.25 40 100 -4.91678  
 6.00 40 100 -6.63945  
 5.75 40 100 -8.98462  
 5.50 40 100 -12.16746  
 5.25 40 100 -16.43086  
 5.00 40 100 -21.95121  
 4.75 40 100 -28.55208  
 4.50 40 100 -34.95584  
 4.25 40 100 -36.98284  
 4.00 40 100 -23.46056

3.75 40 100 32.63278  
3.50 40 100 192.38914  
3.25 40 100 585.95851  
3.00 40 100 1472.34856  
2.75 40 100 3319.66700  
2.50 40 100 6678.27825  
2.25 40 100 8788.01773  
100.00 40 110 -0.00000  
50.00 40 110 -0.00000  
40.00 40 110 -0.00000  
30.00 40 110 -0.00003  
25.00 40 110 -0.00010  
20.00 40 110 -0.00043  
18.00 40 110 -0.00088  
16.00 40 110 -0.00201  
14.00 40 110 -0.00528  
13.00 40 110 -0.00915  
12.00 40 110 -0.01689  
11.00 40 110 -0.03393  
10.50 40 110 -0.05012  
10.00 40 110 -0.07646  
9.75 40 110 -0.09566  
9.50 40 110 -0.12076  
9.25 40 110 -0.15380  
9.00 40 110 -0.19760  
8.75 40 110 -0.25599  
8.50 40 110 -0.33429  
8.25 40 110 -0.43975  
8.00 40 110 -0.58238  
7.75 40 110 -0.77596  
7.50 40 110 -1.03947  
7.25 40 110 -1.39914  
7.00 40 110 -1.89129  
6.75 40 110 -2.56633  
6.50 40 110 -3.49427  
6.25 40 110 -4.77225  
6.00 40 110 -6.53380  
5.75 40 110 -8.95864  
5.50 40 110 -12.27728  
5.25 40 110 -16.75482  
5.00 40 110 -22.61457  
4.75 40 110 -29.80829  
4.50 40 110 -37.42452  
4.25 40 110 -42.28058  
4.00 40 110 -35.73645  
3.75 40 110 3.25960  
3.50 40 110 122.87492  
3.25 40 110 428.33501  
3.00 40 110 1139.56807  
2.75 40 110 2692.88017  
2.50 40 110 5878.82764  
2.25 40 110 8677.88936  
100.00 40 120 -0.00000  
50.00 40 120 -0.00000  
40.00 40 120 -0.00001  
30.00 40 120 -0.00004  
25.00 40 120 -0.00012  
20.00 40 120 -0.00053  
18.00 40 120 -0.00108  
16.00 40 120 -0.00243  
14.00 40 120 -0.00630  
13.00 40 120 -0.01083  
12.00 40 120 -0.01974  
11.00 40 120 -0.03890  
10.50 40 120 -0.05670  
10.00 40 120 -0.08521  
9.75 40 120 -0.10579  
9.50 40 120 -0.13256  
9.25 40 120 -0.16767  
9.00 40 120 -0.21415  
8.75 40 120 -0.27621  
8.50 40 120 -0.35973  
8.25 40 120 -0.47295  
8.00 40 120 -0.62741  
7.75 40 120 -0.83927  
7.50 40 120 -1.13116  
7.25 40 120 -1.53471  
7.00 40 120 -2.09399  
6.75 40 120 -2.87015  
6.50 40 120 -3.94761  
6.25 40 120 -5.44189  
6.00 40 120 -7.50885  
5.75 40 120 -10.35375  
5.50 40 120 -14.23483  
5.25 40 120 -19.44823  
5.00 40 120 -26.26221  
4.75 40 120 -34.72906  
4.50 40 120 -44.21967  
4.25 40 120 -52.35218  
4.00 40 120 -52.62269  
3.75 40 120 -29.26259  
3.50 40 120 53.89047  
3.25 40 120 277.64900  
3.00 40 120 820.89393  
2.75 40 120 2079.38425  
2.50 40 120 4934.19991  
2.25 40 120 8526.80577  
100.00 40 130 -0.00000  
50.00 40 130 -0.00000  
40.00 40 130 -0.00001  
30.00 40 130 -0.00005  
25.00 40 130 -0.00015  
20.00 40 130 -0.00067

18.00 40 130 -0.00137  
 16.00 40 130 -0.00309  
 14.00 40 130 -0.00798  
 13.00 40 130 -0.01370  
 12.00 40 130 -0.02493  
 11.00 40 130 -0.04901  
 10.50 40 130 -0.07139  
 10.00 40 130 -0.10736  
 9.75 40 130 -0.13349  
 9.50 40 130 -0.16767  
 9.25 40 130 -0.21288  
 9.00 40 130 -0.27331  
 8.75 40 130 -0.35492  
 8.50 40 130 -0.46614  
 8.25 40 130 -0.61890  
 8.00 40 130 -0.83006  
 7.75 40 130 -1.12331  
 7.50 40 130 -1.53170  
 7.25 40 130 -2.10102  
 7.00 40 130 -2.89395  
 6.75 40 130 -3.99532  
 6.50 40 130 -5.51803  
 6.25 40 130 -7.60914  
 6.00 40 130 -10.45389  
 5.75 40 130 -14.27266  
 5.50 40 130 -19.29865  
 5.25 40 130 -25.71016  
 5.00 40 130 -33.46279  
 4.75 40 130 -41.91544  
 4.50 40 130 -49.05140  
 4.25 40 130 -49.93417  
 4.00 40 130 -33.73502  
 3.75 40 130 21.98186  
 3.50 40 130 162.64111  
 3.25 40 130 480.92188  
 3.00 40 130 1172.73519  
 2.75 40 130 2674.94608  
 2.50 40 130 5984.78241  
 2.25 40 130 8887.01180  
 100.00 40 140 -0.00000  
 50.00 40 140 -0.00000  
 40.00 40 140 -0.00001  
 30.00 40 140 -0.00006  
 25.00 40 140 -0.00020  
 20.00 40 140 -0.00086  
 18.00 40 140 -0.00175  
 16.00 40 140 -0.00397  
 14.00 40 140 -0.01032  
 13.00 40 140 -0.01783  
 12.00 40 140 -0.03274  
 11.00 40 140 -0.06536  
 10.50 40 140 -0.09640  
 10.00 40 140 -0.14758  
 9.75 40 140 -0.18560  
 9.50 40 140 -0.23623  
 9.25 40 140 -0.30447  
 9.00 40 140 -0.39747  
 8.75 40 140 -0.52544  
 8.50 40 140 -0.70293  
 8.25 40 140 -0.95055  
 8.00 40 140 -1.29717  
 7.75 40 140 -1.78281  
 7.50 40 140 -2.46213  
 7.25 40 140 -3.40837  
 7.00 40 140 -4.71728  
 6.75 40 140 -6.50976  
 6.50 40 140 -8.93017  
 6.25 40 140 -12.13316  
 6.00 40 140 -16.24314  
 5.75 40 140 -21.25118  
 5.50 40 140 -26.77737  
 5.25 40 140 -31.55912  
 5.00 40 140 -32.42171  
 4.75 40 140 -22.35390  
 4.50 40 140 12.79572  
 4.25 40 140 99.46951  
 4.00 40 140 283.70583  
 3.75 40 140 641.10999  
 3.50 40 140 1292.39740  
 3.25 40 140 2435.52086  
 3.00 40 140 4423.26990  
 2.75 40 140 7378.87475  
 2.50 40 140 8970.40007  
 2.25 40 140 9551.73164  
 100.00 40 150 -0.00000  
 50.00 40 150 -0.00000  
 40.00 40 150 -0.00001  
 30.00 40 150 -0.00007  
 25.00 40 150 -0.00024  
 20.00 40 150 -0.00106  
 18.00 40 150 -0.00218  
 16.00 40 150 -0.00499  
 14.00 40 150 -0.01314  
 13.00 40 150 -0.02293  
 12.00 40 150 -0.04279  
 11.00 40 150 -0.08781  
 10.50 40 150 -0.13234  
 10.00 40 150 -0.20858  
 9.75 40 150 -0.26694  
 9.50 40 150 -0.34636  
 9.25 40 150 -0.45568  
 9.00 40 150 -0.60764  
 8.75 40 150 -0.82044

8.50 40 150 -1.11992  
8.25 40 150 -1.54222  
8.00 40 150 -2.13715  
7.75 40 150 -2.97185  
7.50 40 150 -4.13426  
7.25 40 150 -5.73466  
7.00 40 150 -7.90138  
6.75 40 150 -10.76132  
6.50 40 150 -14.38279  
6.25 40 150 -18.62836  
6.00 40 150 -22.79938  
5.75 40 150 -24.81787  
5.50 40 150 -19.43701  
5.25 40 150 5.43761  
5.00 40 150 75.71996  
4.75 40 150 242.93101  
4.50 40 150 600.88012  
4.25 40 150 1302.44465  
4.00 40 150 2563.41665  
3.75 40 150 4638.87880  
3.50 40 150 7290.99858  
3.25 40 150 8698.49939  
3.00 40 150 9289.60838  
2.75 40 150 9591.42222  
2.50 40 150 9763.39218  
2.25 40 150 9859.31901  
100.00 40 160 -0.00000  
50.00 40 160 -0.00000  
40.00 40 160 -0.00001  
30.00 40 160 -0.00008  
25.00 40 160 -0.00028  
20.00 40 160 -0.00125  
18.00 40 160 -0.00258  
16.00 40 160 -0.00596  
14.00 40 160 -0.01595  
13.00 40 160 -0.02816  
12.00 40 160 -0.05349  
11.00 40 160 -0.11320  
10.50 40 160 -0.17470  
10.00 40 160 -0.28386  
9.75 40 160 -0.36971  
9.50 40 160 -0.48863  
9.25 40 160 -0.65504  
9.00 40 160 -0.88968  
8.75 40 160 -1.22207  
8.50 40 160 -1.69368  
8.25 40 160 -2.36162  
8.00 40 160 -3.30259  
7.75 40 160 -4.61579  
7.50 40 160 -6.42182  
7.25 40 160 -8.84996  
7.00 40 160 -11.99495  
6.75 40 160 -15.79549  
6.50 40 160 -19.71630  
6.25 40 160 -21.94801  
6.00 40 160 -17.45977  
5.75 40 160 6.55973  
5.50 40 160 80.85345  
5.25 40 160 275.18249  
5.00 40 160 737.75412  
4.75 40 160 1756.49324  
4.50 40 160 3819.59269  
4.25 40 160 7168.05979  
4.00 40 160 8864.98615  
3.75 40 160 9397.24108  
3.50 40 160 9642.06339  
3.25 40 160 9779.95484  
3.00 40 160 9861.83499  
2.75 40 160 9912.10064  
2.50 40 160 9943.61449  
2.25 40 160 9963.63868  
100.00 40 170 -0.00000  
50.00 40 170 -0.00000  
40.00 40 170 -0.00001  
30.00 40 170 -0.00009  
25.00 40 170 -0.00031  
20.00 40 170 -0.00138  
18.00 40 170 -0.00287  
16.00 40 170 -0.00668  
14.00 40 170 -0.01807  
13.00 40 170 -0.03220  
12.00 40 170 -0.06200  
11.00 40 170 -0.13437  
10.50 40 170 -0.21117  
10.00 40 170 -0.35093  
9.75 40 170 -0.46275  
9.50 40 170 -0.61938  
9.25 40 170 -0.84069  
9.00 40 170 -1.15517  
8.75 40 170 -1.60319  
8.50 40 170 -2.24089  
8.25 40 170 -3.14437  
8.00 40 170 -4.41310  
7.75 40 170 -6.16928  
7.50 40 170 -8.54524  
7.25 40 170 -11.63780  
7.00 40 170 -15.37497  
6.75 40 170 -19.15231  
6.50 40 170 -20.87337  
6.25 40 170 -14.48044  
6.00 40 170 16.22559  
5.75 40 170 112.50402  
5.50 40 170 374.89979

5.25 40 170 1035.71035  
5.00 40 170 2591.09287  
4.75 40 170 5936.06021  
4.50 40 170 8709.72899  
4.25 40 170 9434.36123  
4.00 40 170 9713.08841  
3.75 40 170 9847.02559  
3.50 40 170 9916.27366  
3.25 40 170 9953.52224  
3.00 40 170 9973.99803  
2.75 40 170 9985.39010  
2.50 40 170 9991.77111  
2.25 40 170 9995.35884  
100.00 40 180 -0.00000  
50.00 40 180 -0.00000  
40.00 40 180 -0.00002  
30.00 40 180 -0.00010  
25.00 40 180 -0.00032  
20.00 40 180 -0.00143  
18.00 40 180 -0.00298  
16.00 40 180 -0.00694  
14.00 40 180 -0.01887  
13.00 40 180 -0.03373  
12.00 40 180 -0.06528  
11.00 40 180 -0.14278  
10.50 40 180 -0.22589  
10.00 40 180 -0.37850  
9.75 40 180 -0.50131  
9.50 40 180 -0.67397  
9.25 40 180 -0.91867  
9.00 40 180 -1.26723  
8.75 40 180 -1.76460  
8.50 40 180 -2.47301  
8.25 40 180 -3.47627  
8.00 40 180 -4.88244  
7.75 40 180 -6.82073  
7.50 40 180 -9.42105  
7.25 40 180 -12.74621  
7.00 40 180 -16.59703  
6.75 40 180 -19.97982  
6.50 40 180 -19.68929  
6.25 40 180 -6.61997  
6.00 40 180 43.58607  
5.75 40 180 193.43309  
5.50 40 180 596.76760  
5.25 40 180 1611.87193  
5.00 40 180 4000.39471  
4.75 40 180 7900.61029  
4.50 40 180 9253.37450  
4.25 40 180 9651.45982  
4.00 40 180 9825.25986  
3.75 40 180 9909.24976  
3.50 40 180 9952.01248  
3.25 40 180 9974.38445  
3.00 40 180 9986.25794  
2.75 40 180 9992.60801  
2.50 40 180 9996.01806  
2.25 40 180 9997.85334  
100.00 50 0 -0.00000  
50.00 50 0 -0.00000  
40.00 50 0 -0.00001  
30.00 50 0 -0.00006  
25.00 50 0 -0.00019  
20.00 50 0 -0.00080  
18.00 50 0 -0.00163  
16.00 50 0 -0.00374  
14.00 50 0 -0.01036  
13.00 50 0 -0.01937  
12.00 50 0 -0.04112  
11.00 50 0 -0.10290  
10.50 50 0 -0.17313  
10.00 50 0 -0.30114  
9.75 50 0 -0.40096  
9.50 50 0 -0.53638  
9.25 50 0 -0.72011  
9.00 50 0 -0.96931  
8.75 50 0 -1.30728  
8.50 50 0 -1.76604  
8.25 50 0 -2.39025  
8.00 50 0 -3.24338  
7.75 50 0 -4.41703  
7.50 50 0 -6.04342  
7.25 50 0 -8.30692  
7.00 50 0 -11.43608  
6.75 50 0 -15.61641  
6.50 50 0 -20.65429  
6.25 50 0 -24.94782  
6.00 50 0 -22.66597  
5.75 50 0 3.45008  
5.50 50 0 99.48087  
5.25 50 0 380.41160  
5.00 50 0 1118.53187  
4.75 50 0 2931.14102  
4.50 50 0 6911.09834  
4.25 50 0 9182.15976  
4.00 50 0 9719.58977  
3.75 50 0 9891.57014  
3.50 50 0 9956.13496  
3.25 50 0 9981.93370  
3.00 50 0 9992.50458  
2.75 50 0 9996.88086  
2.50 50 0 9998.70037  
2.25 50 0 9999.45821

100.00 50 10 -0.00000  
 50.00 50 10 -0.00000  
 40.00 50 10 -0.00001  
 30.00 50 10 -0.00006  
 25.00 50 10 -0.00018  
 20.00 50 10 -0.00078  
 18.00 50 10 -0.00160  
 16.00 50 10 -0.00368  
 14.00 50 10 -0.01015  
 13.00 50 10 -0.01895  
 12.00 50 10 -0.04016  
 11.00 50 10 -0.10032  
 10.50 50 10 -0.16862  
 10.00 50 10 -0.29291  
 9.75 50 10 -0.38967  
 9.50 50 10 -0.52072  
 9.25 50 10 -0.69813  
 9.00 50 10 -0.93808  
 8.75 50 10 -1.26229  
 8.50 50 10 -1.70025  
 8.25 50 10 -2.29248  
 8.00 50 10 -3.09572  
 7.75 50 10 -4.19094  
 7.50 50 10 -5.69467  
 7.25 50 10 -7.77176  
 7.00 50 10 -10.63869  
 6.75 50 10 -14.51988  
 6.50 50 10 -19.44898  
 6.25 50 10 -24.63254  
 6.00 50 10 -26.68759  
 5.75 50 10 -15.17295  
 5.50 50 10 37.99977  
 5.25 50 10 202.16837  
 5.00 50 10 637.28940  
 4.75 50 10 1689.87001  
 4.50 50 10 4063.04515  
 4.25 50 10 7895.88005  
 4.00 50 10 9305.27154  
 3.75 50 10 9717.96298  
 3.50 50 10 9875.20536  
 3.25 50 10 9942.68655  
 3.00 50 10 9973.23194  
 2.75 50 10 9987.40044  
 2.50 50 10 9994.04780  
 2.25 50 10 9997.18327  
 100.00 50 20 -0.00000  
 50.00 50 20 -0.00000  
 40.00 50 20 -0.00001  
 30.00 50 20 -0.00006  
 25.00 50 20 -0.00018  
 20.00 50 20 -0.00074  
 18.00 50 20 -0.00152  
 16.00 50 20 -0.00348  
 14.00 50 20 -0.00957  
 13.00 50 20 -0.01778  
 12.00 50 20 -0.03752  
 11.00 50 20 -0.09327  
 10.50 50 20 -0.15638  
 10.00 50 20 -0.27082  
 9.75 50 20 -0.35960  
 9.50 50 20 -0.47943  
 9.25 50 20 -0.64092  
 9.00 50 20 -0.85804  
 8.75 50 20 -1.14914  
 8.50 50 20 -1.53834  
 8.25 50 20 -2.05761  
 8.00 50 20 -2.74997  
 7.75 50 20 -3.67450  
 7.50 50 20 -4.91430  
 7.25 50 20 -6.58792  
 7.00 50 20 -8.86288  
 6.75 50 20 -11.96236  
 6.50 50 20 -16.13473  
 6.25 50 20 -21.50298  
 6.00 50 20 -27.59082  
 5.75 50 20 -32.06784  
 5.50 50 20 -27.76410  
 5.25 50 20 3.86118  
 5.00 50 20 105.93464  
 4.75 50 20 370.82844  
 4.50 50 20 982.28590  
 4.25 50 20 2281.06701  
 4.00 50 20 4860.89934  
 3.75 50 20 8110.41859  
 3.50 50 20 9265.07815  
 3.25 50 20 9658.32713  
 3.00 50 20 9829.36515  
 2.75 50 20 9911.74995  
 2.50 50 20 9953.53869  
 2.25 50 20 9975.31146  
 100.00 50 30 -0.00000  
 50.00 50 30 -0.00000  
 40.00 50 30 -0.00001  
 30.00 50 30 -0.00005  
 25.00 50 30 -0.00016  
 20.00 50 30 -0.00068  
 18.00 50 30 -0.00140  
 16.00 50 30 -0.00320  
 14.00 50 30 -0.00873  
 13.00 50 30 -0.01613  
 12.00 50 30 -0.03377  
 11.00 50 30 -0.08331  
 10.50 50 30 -0.13919

10.00 50 30 -0.24020  
 9.75 50 30 -0.31834  
 9.50 50 30 -0.42352  
 9.25 50 30 -0.56479  
 9.00 50 30 -0.75386  
 8.75 50 30 -1.00582  
 8.50 50 30 -1.33995  
 8.25 50 30 -1.78087  
 8.00 50 30 -2.36020  
 7.75 50 30 -3.11913  
 7.50 50 30 -4.11277  
 7.25 50 30 -5.41728  
 7.00 50 30 -7.14094  
 6.75 50 30 -9.43950  
 6.50 50 30 -12.53159  
 6.25 50 30 -16.69792  
 6.00 50 30 -22.21718  
 5.75 50 30 -29.12235  
 5.50 50 30 -36.51540  
 5.25 50 30 -40.88684  
 5.00 50 30 -32.32295  
 4.75 50 30 13.58559  
 4.50 50 30 152.33317  
 4.25 50 30 503.44459  
 4.00 50 30 1313.29821  
 3.75 50 30 3065.22245  
 3.50 50 30 6510.70451  
 3.25 50 30 8845.87899  
 3.00 50 30 9494.70004  
 2.75 50 30 9725.06759  
 2.50 50 30 9835.95928  
 2.25 50 30 9900.27445  
 100.00 50 40 -0.00000  
 50.00 50 40 -0.00000  
 40.00 50 40 -0.00001  
 30.00 50 40 -0.00005  
 25.00 50 40 -0.00014  
 20.00 50 40 -0.00061  
 18.00 50 40 -0.00125  
 16.00 50 40 -0.00286  
 14.00 50 40 -0.00776  
 13.00 50 40 -0.01425  
 12.00 50 40 -0.02953  
 11.00 50 40 -0.07202  
 10.50 50 40 -0.11971  
 10.00 50 40 -0.20569  
 9.75 50 40 -0.27210  
 9.50 50 40 -0.36141  
 9.25 50 40 -0.48122  
 9.00 50 40 -0.64133  
 8.75 50 40 -0.85427  
 8.50 50 40 -1.13585  
 8.25 50 40 -1.50584  
 8.00 50 40 -1.98896  
 7.75 50 40 -2.61614  
 7.50 50 40 -3.42687  
 7.25 50 40 -4.47296  
 7.00 50 40 -5.82512  
 6.75 50 40 -7.58303  
 6.50 50 40 -9.88918  
 6.25 50 40 -12.94155  
 6.00 50 40 -16.98833  
 5.75 50 40 -22.25664  
 5.50 50 40 -28.69747  
 5.25 50 40 -35.27796  
 5.00 50 40 -38.23884  
 4.75 50 40 -27.10570  
 4.50 50 40 23.96151  
 4.25 50 40 173.99063  
 4.00 50 40 549.52789  
 3.75 50 40 1403.57951  
 3.50 50 40 3194.65693  
 3.25 50 40 6504.44080  
 3.00 50 40 8718.56993  
 2.75 50 40 9372.85989  
 2.50 50 40 9621.41161  
 2.25 50 40 9760.37506  
 100.00 50 50 -0.00000  
 50.00 50 50 -0.00000  
 40.00 50 50 -0.00001  
 30.00 50 50 -0.00004  
 25.00 50 50 -0.00012  
 20.00 50 50 -0.00054  
 18.00 50 50 -0.00110  
 16.00 50 50 -0.00252  
 14.00 50 50 -0.00681  
 13.00 50 50 -0.01239  
 12.00 50 50 -0.02533  
 11.00 50 50 -0.06070  
 10.50 50 50 -0.10005  
 10.00 50 50 -0.17075  
 9.75 50 50 -0.22530  
 9.50 50 50 -0.29864  
 9.25 50 50 -0.39706  
 9.00 50 50 -0.52868  
 8.75 50 50 -0.70388  
 8.50 50 50 -0.93580  
 8.25 50 50 -1.24081  
 8.00 50 50 -1.63921  
 7.75 50 50 -2.15605  
 7.50 50 50 -2.82246  
 7.25 50 50 -3.67786  
 7.00 50 50 -4.77364

6.75 50 50 -6.17926  
6.50 50 50 -7.99094  
6.25 50 50 -10.34140  
6.00 50 50 -13.40260  
5.75 50 50 -17.35770  
5.50 50 50 -22.28174  
5.25 50 50 -27.79128  
5.00 50 50 -32.15911  
4.75 50 50 -30.26601  
4.50 50 50 -9.15343  
4.25 50 50 61.09864  
4.00 50 50 244.87792  
3.75 50 50 671.43406  
3.50 50 50 1578.64280  
3.25 50 50 3351.37096  
3.00 50 50 6392.71107  
2.75 50 50 8529.22135  
2.50 50 50 9235.72950  
2.25 50 50 9524.63555  
100.00 50 60 -0.00000  
50.00 50 60 -0.00000  
40.00 50 60 -0.00001  
30.00 50 60 -0.00003  
25.00 50 60 -0.00011  
20.00 50 60 -0.00047  
18.00 50 60 -0.00096  
16.00 50 60 -0.00221  
14.00 50 60 -0.00595  
13.00 50 60 -0.01073  
12.00 50 60 -0.02156  
11.00 50 60 -0.05038  
10.50 50 60 -0.08199  
10.00 50 60 -0.13841  
9.75 50 60 -0.18183  
9.50 50 60 -0.24019  
9.25 50 60 -0.31854  
9.00 50 60 -0.42346  
8.75 50 60 -0.56345  
8.50 50 60 -0.74929  
8.25 50 60 -0.99458  
8.00 50 60 -1.31623  
7.75 50 60 -1.73514  
7.50 50 60 -2.27715  
7.25 50 60 -2.97441  
7.00 50 60 -3.86779  
6.75 50 60 -5.01072  
6.50 50 60 -6.47517  
6.25 50 60 -8.35966  
6.00 50 60 -10.79667  
5.75 50 60 -13.94991  
5.50 50 60 -17.97546  
5.25 50 60 -22.88409  
5.00 50 60 -28.16550  
4.75 50 60 -31.88201  
4.50 50 60 -28.64768  
4.25 50 60 -5.39112  
4.00 50 60 67.00621  
3.75 50 60 249.02009  
3.50 50 60 657.56569  
3.25 50 60 1499.92243  
3.00 50 60 3103.84490  
2.75 50 60 5890.41080  
2.50 50 60 8315.01488  
2.25 50 60 9190.91832  
100.00 50 70 -0.00000  
50.00 50 70 -0.00000  
40.00 50 70 -0.00000  
30.00 50 70 -0.00003  
25.00 50 70 -0.00009  
20.00 50 70 -0.00041  
18.00 50 70 -0.00085  
16.00 50 70 -0.00195  
14.00 50 70 -0.00525  
13.00 50 70 -0.00938  
12.00 50 70 -0.01849  
11.00 50 70 -0.04186  
10.50 50 70 -0.06692  
10.00 50 70 -0.11115  
9.75 50 70 -0.14502  
9.50 50 70 -0.19045  
9.25 50 70 -0.25143  
9.00 50 70 -0.33316  
8.75 50 70 -0.44245  
8.50 50 70 -0.58807  
8.25 50 70 -0.78118  
8.00 50 70 -1.03587  
7.75 50 70 -1.36978  
7.50 50 70 -1.80487  
7.25 50 70 -2.36857  
7.00 50 70 -3.09551  
6.75 50 70 -4.03030  
6.50 50 70 -5.23199  
6.25 50 70 -6.78085  
6.00 50 70 -8.78713  
5.75 50 70 -11.39935  
5.50 50 70 -14.80243  
5.25 50 70 -19.17963  
5.00 50 70 -24.57616  
4.75 50 70 -30.52502  
4.50 50 70 -35.14118  
4.25 50 70 -33.09198  
4.00 50 70 -11.31654  
3.75 50 70 59.49825

3.50 50 70 240.84395  
3.25 50 70 653.92774  
3.00 50 70 1522.92923  
2.75 50 70 3235.63609  
2.50 50 70 6334.19062  
2.25 50 70 8643.46710  
100.00 50 80 -0.00000  
50.00 50 80 -0.00000  
40.00 50 80 -0.00000  
30.00 50 80 -0.00002  
25.00 50 80 -0.00008  
20.00 50 80 -0.00037  
18.00 50 80 -0.00077  
16.00 50 80 -0.00178  
14.00 50 80 -0.00476  
13.00 50 80 -0.00844  
12.00 50 80 -0.01629  
11.00 50 80 -0.03557  
10.50 50 80 -0.05564  
10.00 50 80 -0.09045  
9.75 50 80 -0.11686  
9.50 50 80 -0.15215  
9.25 50 80 -0.19940  
9.00 50 80 -0.26269  
8.75 50 80 -0.34743  
8.50 50 80 -0.46068  
8.25 50 80 -0.61160  
8.00 50 80 -0.81194  
7.75 50 80 -1.07671  
7.50 50 80 -1.42498  
7.25 50 80 -1.88095  
7.00 50 80 -2.47552  
6.75 50 80 -3.24865  
6.50 50 80 -4.25308  
6.25 50 80 -5.56001  
6.00 50 80 -7.26734  
5.75 50 80 -9.51003  
5.50 50 80 -12.46887  
5.25 50 80 -16.36504  
5.00 50 80 -21.40666  
4.75 50 80 -27.60484  
4.50 50 80 -34.27329  
4.25 50 80 -38.81260  
4.00 50 80 -33.96698  
3.75 50 80 -1.98639  
3.50 50 80 97.14645  
3.25 50 80 348.18996  
3.00 50 80 921.02525  
2.75 50 80 2137.98357  
2.50 50 80 4573.81462  
2.25 50 80 7925.51553  
100.00 50 90 -0.00000  
50.00 50 90 -0.00000  
40.00 50 90 -0.00000  
30.00 50 90 -0.00002  
25.00 50 90 -0.00008  
20.00 50 90 -0.00035  
18.00 50 90 -0.00073  
16.00 50 90 -0.00170  
14.00 50 90 -0.00454  
13.00 50 90 -0.00797  
12.00 50 90 -0.01507  
11.00 50 90 -0.03173  
10.50 50 90 -0.04845  
10.00 50 90 -0.07679  
9.75 50 90 -0.09800  
9.50 50 90 -0.12614  
9.25 50 90 -0.16361  
9.00 50 90 -0.21366  
8.75 50 90 -0.28062  
8.50 50 90 -0.37024  
8.25 50 90 -0.49012  
8.00 50 90 -0.65023  
7.75 50 90 -0.86361  
7.50 50 90 -1.14724  
7.25 50 90 -1.52322  
7.00 50 90 -2.02044  
6.75 50 90 -2.67693  
6.50 50 90 -3.54337  
6.25 50 90 -4.68833  
6.00 50 90 -6.20572  
5.75 50 90 -8.22447  
5.50 50 90 -10.91832  
5.25 50 90 -14.50709  
5.00 50 90 -19.22520  
4.75 50 90 -25.19569  
4.50 50 90 -32.06569  
4.25 50 90 -38.08667  
4.00 50 90 -37.97742  
3.75 50 90 -18.25706  
3.50 50 90 52.41996  
3.25 50 90 242.29580  
3.00 50 90 692.10962  
2.75 50 90 1677.98676  
2.50 50 90 3714.77330  
2.25 50 90 7245.27815  
100.00 50 100 -0.00000  
50.00 50 100 -0.00000  
40.00 50 100 -0.00000  
30.00 50 100 -0.00002  
25.00 50 100 -0.00008  
20.00 50 100 -0.00037  
18.00 50 100 -0.00077

16.00 50 100 -0.00177  
 14.00 50 100 -0.00465  
 13.00 50 100 -0.00808  
 12.00 50 100 -0.01500  
 11.00 50 100 -0.03051  
 10.50 50 100 -0.04551  
 10.00 50 100 -0.07026  
 9.75 50 100 -0.08847  
 9.50 50 100 -0.11239  
 9.25 50 100 -0.14399  
 9.00 50 100 -0.18596  
 8.75 50 100 -0.24194  
 8.50 50 100 -0.31681  
 8.25 50 100 -0.41719  
 8.00 50 100 -0.55194  
 7.75 50 100 -0.73295  
 7.50 50 100 -0.97612  
 7.25 50 100 -1.30278  
 7.00 50 100 -1.74155  
 6.75 50 100 -2.33102  
 6.50 50 100 -3.12355  
 6.25 50 100 -4.19059  
 6.00 50 100 -5.63002  
 5.75 50 100 -7.57531  
 5.50 50 100 -10.20476  
 5.25 50 100 -13.74359  
 5.00 50 100 -18.43939  
 4.75 50 100 -24.46058  
 4.50 50 100 -31.60163  
 4.25 50 100 -38.53670  
 4.00 50 100 -41.07567  
 3.75 50 100 -28.31221  
 3.50 50 100 25.51533  
 3.25 50 100 177.60410  
 3.00 50 100 549.36999  
 2.75 50 100 1389.87911  
 2.50 50 100 3197.35682  
 2.25 50 100 6752.58960  
 100.00 50 110 -0.00000  
 50.00 50 110 -0.00000  
 40.00 50 110 -0.00000  
 30.00 50 110 -0.00003  
 25.00 50 110 -0.00010  
 20.00 50 110 -0.00043  
 18.00 50 110 -0.00088  
 16.00 50 110 -0.00200  
 14.00 50 110 -0.00519  
 13.00 50 110 -0.00893  
 12.00 50 110 -0.01632  
 11.00 50 110 -0.03232  
 10.50 50 110 -0.04729  
 10.00 50 110 -0.07140  
 9.75 50 110 -0.08886  
 9.50 50 110 -0.11156  
 9.25 50 110 -0.14131  
 9.00 50 110 -0.18059  
 8.75 50 110 -0.23278  
 8.50 50 110 -0.30255  
 8.25 50 110 -0.39630  
 8.00 50 110 -0.52281  
 7.75 50 110 -0.69417  
 7.50 50 110 -0.92697  
 7.25 50 110 -1.24402  
 7.00 50 110 -1.67669  
 6.75 50 110 -2.26811  
 6.50 50 110 -3.07760  
 6.25 50 110 -4.18665  
 6.00 50 110 -5.70664  
 5.75 50 110 -7.78816  
 5.50 50 110 -10.62992  
 5.25 50 110 -14.48120  
 5.00 50 110 -19.62124  
 4.75 50 110 -26.27565  
 4.50 50 110 -34.37755  
 4.25 50 110 -42.97011  
 4.00 50 110 -48.81232  
 3.75 50 110 -43.25687  
 3.50 50 110 -5.41954  
 3.25 50 110 112.63573  
 3.00 50 110 418.16465  
 2.75 50 110 1149.03411  
 2.50 50 110 2834.10416  
 2.25 50 110 6528.42878  
 100.00 50 120 -0.00000  
 50.00 50 120 -0.00000  
 40.00 50 120 -0.00001  
 30.00 50 120 -0.00004  
 25.00 50 120 -0.00012  
 20.00 50 120 -0.00053  
 18.00 50 120 -0.00108  
 16.00 50 120 -0.00244  
 14.00 50 120 -0.00627  
 13.00 50 120 -0.01073  
 12.00 50 120 -0.01943  
 11.00 50 120 -0.03794  
 10.50 50 120 -0.05496  
 10.00 50 120 -0.08201  
 9.75 50 120 -0.10144  
 9.50 50 120 -0.12662  
 9.25 50 120 -0.15954  
 9.00 50 120 -0.20300  
 8.75 50 120 -0.26087  
 8.50 50 120 -0.33858

8.25 50 120 -0.44371  
8.00 50 120 -0.58691  
7.75 50 120 -0.78305  
7.50 50 120 -1.05290  
7.25 50 120 -1.42542  
7.00 50 120 -1.94076  
6.75 50 120 -2.65430  
6.50 50 120 -3.64199  
6.25 50 120 -5.00691  
6.00 50 120 -6.88727  
5.75 50 120 -9.46470  
5.50 50 120 -12.97002  
5.25 50 120 -17.67903  
5.00 50 120 -23.88024  
4.75 50 120 -31.77433  
4.50 50 120 -41.21807  
4.25 50 120 -51.12693  
4.00 50 120 -58.14119  
3.75 50 120 -53.69153  
3.50 50 120 -17.49006  
3.25 50 120 97.31093  
3.00 50 120 399.25955  
2.75 50 120 1144.72145  
2.50 50 120 2952.55260  
2.25 50 120 7012.91155  
100.00 50 130 -0.00000  
50.00 50 130 -0.00000  
40.00 50 130 -0.00001  
30.00 50 130 -0.00005  
25.00 50 130 -0.00016  
20.00 50 130 -0.00068  
18.00 50 130 -0.00138  
16.00 50 130 -0.00311  
14.00 50 130 -0.00800  
13.00 50 130 -0.01369  
12.00 50 130 -0.02482  
11.00 50 130 -0.04854  
10.50 50 130 -0.07046  
10.00 50 130 -0.10556  
9.75 50 130 -0.13100  
9.50 50 130 -0.16421  
9.25 50 130 -0.20807  
9.00 50 130 -0.26663  
8.75 50 130 -0.34561  
8.50 50 130 -0.45315  
8.25 50 130 -0.60076  
8.00 50 130 -0.80466  
7.75 50 130 -1.08768  
7.50 50 130 -1.48159  
7.25 50 130 -2.03031  
7.00 50 130 -2.79382  
6.75 50 130 -3.85292  
6.50 50 130 -5.31458  
6.25 50 130 -7.31716  
6.00 50 130 -10.03337  
5.75 50 130 -13.66630  
5.50 50 130 -18.42736  
5.25 50 130 -24.47234  
5.00 50 130 -31.74763  
4.75 50 130 -39.65343  
4.50 50 130 -46.35377  
4.25 50 130 -47.43108  
4.00 50 130 -33.34180  
3.75 50 130 15.38002  
3.50 50 130 137.48896  
3.25 50 130 410.68115  
3.00 50 130 996.52549  
2.75 50 130 2250.73321  
2.50 50 130 5004.80419  
2.25 50 130 8507.95521  
100.00 50 140 -0.00000  
50.00 50 140 -0.00000  
40.00 50 140 -0.00001  
30.00 50 140 -0.00006  
25.00 50 140 -0.00020  
20.00 50 140 -0.00086  
18.00 50 140 -0.00177  
16.00 50 140 -0.00400  
14.00 50 140 -0.01036  
13.00 50 140 -0.01787  
12.00 50 140 -0.03275  
11.00 50 140 -0.06521  
10.50 50 140 -0.09602  
10.00 50 140 -0.14675  
9.75 50 140 -0.18440  
9.50 50 140 -0.23451  
9.25 50 140 -0.30201  
9.00 50 140 -0.39396  
8.75 50 140 -0.52045  
8.50 50 140 -0.69586  
8.25 50 140 -0.94051  
8.00 50 140 -1.28293  
7.75 50 140 -1.76260  
7.50 50 140 -2.43339  
7.25 50 140 -3.36741  
7.00 50 140 -4.65873  
6.75 50 140 -6.42578  
6.50 50 140 -8.80925  
6.25 50 140 -11.95837  
6.00 50 140 -15.98961  
5.75 50 140 -20.88268  
5.50 50 140 -26.24207  
5.25 50 140 -30.78534

5.00 50 140 -31.31607  
4.75 50 140 -20.80784  
4.50 50 140 14.87834  
4.25 50 140 102.09772  
4.00 50 140 286.62481  
3.75 50 140 643.38871  
3.50 50 140 1291.39428  
3.25 50 140 2423.97859  
3.00 50 140 4380.41699  
2.75 50 140 7303.83050  
2.50 50 140 8926.07788  
2.25 50 140 9524.95225  
100.00 50 150 -0.00000  
50.00 50 150 -0.00000  
40.00 50 150 -0.00001  
30.00 50 150 -0.00007  
25.00 50 150 -0.00024  
20.00 50 150 -0.00106  
18.00 50 150 -0.00219  
16.00 50 150 -0.00501  
14.00 50 150 -0.01318  
13.00 50 150 -0.02298  
12.00 50 150 -0.04285  
11.00 50 150 -0.08782  
10.50 50 150 -0.13226  
10.00 50 150 -0.20831  
9.75 50 150 -0.26651  
9.50 50 150 -0.34569  
9.25 50 150 -0.45467  
9.00 50 150 -0.60613  
8.75 50 150 -0.81822  
8.50 50 150 -1.11668  
8.25 50 150 -1.53753  
8.00 50 150 -2.13037  
7.75 50 150 -2.96207  
7.50 50 150 -4.12014  
7.25 50 150 -5.71427  
7.00 50 150 -7.87187  
6.75 50 150 -10.71850  
6.50 50 150 -14.32042  
6.25 50 150 -18.53710  
6.00 50 150 -22.66517  
5.75 50 150 -24.61942  
5.50 50 150 -19.14190  
5.25 50 150 5.87889  
5.00 50 150 76.38330  
4.75 50 150 243.93272  
4.50 50 150 602.39786  
4.25 50 150 1304.74651  
4.00 50 150 2566.89468  
3.75 50 150 4644.06052  
3.50 50 150 7295.18367  
3.25 50 150 8699.96790  
3.00 50 150 9289.90828  
2.75 50 150 9591.06216  
2.50 50 150 9762.71916  
2.25 50 150 9858.65763  
100.00 50 160 -0.00000  
50.00 50 160 -0.00000  
40.00 50 160 -0.00001  
30.00 50 160 -0.00008  
25.00 50 160 -0.00028  
20.00 50 160 -0.00125  
18.00 50 160 -0.00259  
16.00 50 160 -0.00597  
14.00 50 160 -0.01597  
13.00 50 160 -0.02820  
12.00 50 160 -0.05354  
11.00 50 160 -0.11324  
10.50 50 160 -0.17472  
10.00 50 160 -0.28383  
9.75 50 160 -0.36962  
9.50 50 160 -0.48846  
9.25 50 160 -0.65475  
9.00 50 160 -0.88921  
8.75 50 160 -1.22135  
8.50 50 160 -1.69258  
8.25 50 160 -2.35996  
8.00 50 160 -3.30013  
7.75 50 160 -4.61216  
7.50 50 160 -6.41646  
7.25 50 160 -8.84207  
7.00 50 160 -11.98330  
6.75 50 160 -15.77819  
6.50 50 160 -19.69043  
6.25 50 160 -21.90886  
6.00 50 160 -17.39949  
5.75 50 160 6.65478  
5.50 50 160 81.00809  
5.25 50 160 275.44341  
5.00 50 160 738.21069  
4.75 50 160 1757.31406  
4.50 50 160 3821.07807  
4.25 50 160 7169.64384  
4.00 50 160 8865.52158  
3.75 50 160 9397.49395  
3.50 50 160 9642.22261  
3.25 50 160 9780.05984  
3.00 50 160 9861.90610  
2.75 50 160 9912.14952  
2.50 50 160 9943.64833  
2.25 50 160 9963.66217  
100.00 50 170 -0.00000

50.00 50 170 -0.00000  
40.00 50 170 -0.00001  
30.00 50 170 -0.00009  
25.00 50 170 -0.00031  
20.00 50 170 -0.00138  
18.00 50 170 -0.00287  
16.00 50 170 -0.00668  
14.00 50 170 -0.01808  
13.00 50 170 -0.03221  
12.00 50 170 -0.06201  
11.00 50 170 -0.13439  
10.50 50 170 -0.21119  
10.00 50 170 -0.35094  
9.75 50 170 -0.46275  
9.50 50 170 -0.61937  
9.25 50 170 -0.84065  
9.00 50 170 -1.15510  
8.75 50 170 -1.60307  
8.50 50 170 -2.24070  
8.25 50 170 -3.14407  
8.00 50 170 -4.41263  
7.75 50 170 -6.16857  
7.50 50 170 -8.54415  
7.25 50 170 -11.63614  
7.00 50 170 -15.37240  
6.75 50 170 -19.14826  
6.50 50 170 -20.86682  
6.25 50 170 -14.46934  
6.00 50 170 16.24552  
5.75 50 170 112.54228  
5.50 50 170 374.97802  
5.25 50 170 1035.87773  
5.00 50 170 2591.45647  
4.75 50 170 5936.76344  
4.50 50 170 8709.95866  
4.25 50 170 9434.44447  
4.00 50 170 9713.13175  
3.75 50 170 9847.05003  
3.50 50 170 9916.28800  
3.25 50 170 9953.53082  
3.00 50 170 9974.00319  
2.75 50 170 9985.39322  
2.50 50 170 9991.77299  
2.25 50 170 9995.35997  
100.00 50 180 -0.00000  
50.00 50 180 -0.00000  
40.00 50 180 -0.00002  
30.00 50 180 -0.00010  
25.00 50 180 -0.00032  
20.00 50 180 -0.00143  
18.00 50 180 -0.00298  
16.00 50 180 -0.00694  
14.00 50 180 -0.01887  
13.00 50 180 -0.03373  
12.00 50 180 -0.06528  
11.00 50 180 -0.14278  
10.50 50 180 -0.22589  
10.00 50 180 -0.37850  
9.75 50 180 -0.50131  
9.50 50 180 -0.67397  
9.25 50 180 -0.91867  
9.00 50 180 -1.26723  
8.75 50 180 -1.76460  
8.50 50 180 -2.47301  
8.25 50 180 -3.47627  
8.00 50 180 -4.88244  
7.75 50 180 -6.82073  
7.50 50 180 -9.42105  
7.25 50 180 -12.74621  
7.00 50 180 -16.59703  
6.75 50 180 -19.97982  
6.50 50 180 -19.68929  
6.25 50 180 -6.61997  
6.00 50 180 43.58607  
5.75 50 180 193.43309  
5.50 50 180 596.76760  
5.25 50 180 1611.87193  
5.00 50 180 4000.39471  
4.75 50 180 7900.61029  
4.50 50 180 9253.37450  
4.25 50 180 9651.45982  
4.00 50 180 9825.25986  
3.75 50 180 9909.24976  
3.50 50 180 9952.01248  
3.25 50 180 9974.38445  
3.00 50 180 9986.25794  
2.75 50 180 9992.60801  
2.50 50 180 9996.01806  
2.25 50 180 9997.85334  
100.00 60 0 -0.00000  
50.00 60 0 -0.00000  
40.00 60 0 -0.00001  
30.00 60 0 -0.00006  
25.00 60 0 -0.00019  
20.00 60 0 -0.00080  
18.00 60 0 -0.00163  
16.00 60 0 -0.00374  
14.00 60 0 -0.01036  
13.00 60 0 -0.01937  
12.00 60 0 -0.04112  
11.00 60 0 -0.10290  
10.50 60 0 -0.17313  
10.00 60 0 -0.30114

9.75 60 0 -0.40096  
 9.50 60 0 -0.53638  
 9.25 60 0 -0.72011  
 9.00 60 0 -0.96931  
 8.75 60 0 -1.30728  
 8.50 60 0 -1.76604  
 8.25 60 0 -2.39025  
 8.00 60 0 -3.24338  
 7.75 60 0 -4.41703  
 7.50 60 0 -6.04342  
 7.25 60 0 -8.30692  
 7.00 60 0 -11.43608  
 6.75 60 0 -15.61641  
 6.50 60 0 -20.65429  
 6.25 60 0 -24.94782  
 6.00 60 0 -22.66597  
 5.75 60 0 3.45008  
 5.50 60 0 99.48087  
 5.25 60 0 380.41160  
 5.00 60 0 1118.53187  
 4.75 60 0 2931.14102  
 4.50 60 0 6911.09834  
 4.25 60 0 9182.15976  
 4.00 60 0 9719.58977  
 3.75 60 0 9891.57014  
 3.50 60 0 9956.13496  
 3.25 60 0 9981.93370  
 3.00 60 0 9992.50458  
 2.75 60 0 9996.88086  
 2.50 60 0 9998.70037  
 2.25 60 0 9999.45821  
 100.00 60 10 -0.00000  
 50.00 60 10 -0.00000  
 40.00 60 10 -0.00001  
 30.00 60 10 -0.00006  
 25.00 60 10 -0.00018  
 20.00 60 10 -0.00078  
 18.00 60 10 -0.00160  
 16.00 60 10 -0.00367  
 14.00 60 10 -0.01012  
 13.00 60 10 -0.01888  
 12.00 60 10 -0.03998  
 11.00 60 10 -0.09974  
 10.50 60 10 -0.16756  
 10.00 60 10 -0.29095  
 9.75 60 10 -0.38702  
 9.50 60 10 -0.51716  
 9.25 60 10 -0.69338  
 9.00 60 10 -0.93176  
 8.75 60 10 -1.25396  
 8.50 60 10 -1.68934  
 8.25 60 10 -2.27829  
 8.00 60 10 -3.07737  
 7.75 60 10 -4.16725  
 7.50 60 10 -5.66394  
 7.25 60 10 -7.73128  
 7.00 60 10 -10.58375  
 6.75 60 10 -14.44160  
 6.50 60 10 -19.32970  
 6.25 60 10 -24.43609  
 6.00 60 10 -26.33842  
 5.75 60 10 -14.51203  
 5.50 60 10 39.30576  
 5.25 60 10 204.80377  
 5.00 60 10 642.59736  
 4.75 60 10 1700.26392  
 4.50 60 10 4082.11132  
 4.25 60 10 7907.32944  
 4.00 60 10 9306.88785  
 3.75 60 10 9717.99540  
 3.50 60 10 9874.99591  
 3.25 60 10 9942.49391  
 3.00 60 10 9973.09746  
 2.75 60 10 9987.31611  
 2.50 60 10 9993.99798  
 2.25 60 10 9997.15494  
 100.00 60 20 -0.00000  
 50.00 60 20 -0.00000  
 40.00 60 20 -0.00001  
 30.00 60 20 -0.00006  
 25.00 60 20 -0.00017  
 20.00 60 20 -0.00074  
 18.00 60 20 -0.00151  
 16.00 60 20 -0.00345  
 14.00 60 20 -0.00946  
 13.00 60 20 -0.01754  
 12.00 60 20 -0.03687  
 11.00 60 20 -0.09121  
 10.50 60 20 -0.15261  
 10.00 60 20 -0.26391  
 9.75 60 20 -0.35026  
 9.50 60 20 -0.46687  
 9.25 60 20 -0.62411  
 9.00 60 20 -0.83567  
 8.75 60 20 -1.11958  
 8.50 60 20 -1.49957  
 8.25 60 20 -2.00709  
 8.00 60 20 -2.68448  
 7.75 60 20 -3.58983  
 7.50 60 20 -4.80450  
 7.25 60 20 -6.44395  
 7.00 60 20 -8.66985  
 6.75 60 20 -11.69406

6.50 60 20 -15.74307  
6.25 60 20 -20.89756  
6.00 60 20 -26.59950  
5.75 60 20 -30.36207  
5.50 60 20 -24.72222  
5.25 60 20 9.38203  
5.00 60 20 115.89739  
4.75 60 20 388.09681  
4.50 60 20 1009.22231  
4.25 60 20 2312.45566  
4.00 60 20 4859.64985  
3.75 60 20 8055.81964  
3.50 60 20 9225.12924  
3.25 60 20 9631.86558  
3.00 60 20 9812.59321  
2.75 60 20 9901.13042  
2.50 60 20 9946.86442  
2.25 60 20 9971.16065  
100.00 60 30 -0.00000  
50.00 60 30 -0.00000  
40.00 60 30 -0.00001  
30.00 60 30 -0.00005  
25.00 60 30 -0.00016  
20.00 60 30 -0.00067  
18.00 60 30 -0.00137  
16.00 60 30 -0.00314  
14.00 60 30 -0.00852  
13.00 60 30 -0.01567  
12.00 60 30 -0.03256  
11.00 60 30 -0.07954  
10.50 60 30 -0.13231  
10.00 60 30 -0.22759  
9.75 60 30 -0.30129  
9.50 60 30 -0.40056  
9.25 60 30 -0.53401  
9.00 60 30 -0.71283  
8.75 60 30 -0.95148  
8.50 60 30 -1.26849  
8.25 60 30 -1.68754  
8.00 60 30 -2.23897  
7.75 60 30 -2.96221  
7.50 60 30 -3.90955  
7.25 60 30 -5.15237  
7.00 60 30 -6.79061  
6.75 60 30 -8.96532  
6.50 60 30 -11.86992  
6.25 60 30 -15.74369  
6.00 60 30 -20.80185  
5.75 60 30 -26.99190  
5.50 60 30 -33.33303  
5.25 60 30 -36.34089  
5.00 60 30 -26.57870  
4.75 60 30 18.42060  
4.50 60 30 147.94161  
4.25 60 30 463.78152  
4.00 60 30 1165.98813  
3.75 60 30 2628.51862  
3.50 60 30 5500.86247  
3.25 60 30 8405.89681  
3.00 60 30 9327.72005  
2.75 60 30 9647.62948  
2.50 60 30 9796.93879  
2.25 60 30 9879.97108  
100.00 60 40 -0.00000  
50.00 60 40 -0.00000  
40.00 60 40 -0.00001  
30.00 60 40 -0.00004  
25.00 60 40 -0.00014  
20.00 60 40 -0.00060  
18.00 60 40 -0.00122  
16.00 60 40 -0.00278  
14.00 60 40 -0.00748  
13.00 60 40 -0.01362  
12.00 60 40 -0.02789  
11.00 60 40 -0.06698  
10.50 60 40 -0.11054  
10.00 60 40 -0.18890  
9.75 60 40 -0.24941  
9.50 60 40 -0.33082  
9.25 60 40 -0.44016  
9.00 60 40 -0.58649  
8.75 60 40 -0.78148  
8.50 60 40 -1.03988  
8.25 60 40 -1.38018  
8.00 60 40 -1.82543  
7.75 60 40 -2.40436  
7.50 60 40 -3.15313  
7.25 60 40 -4.11834  
7.00 60 40 -5.36211  
6.75 60 40 -6.97012  
6.50 60 40 -9.06319  
6.25 60 40 -11.80945  
6.00 60 40 -15.42620  
5.75 60 40 -20.13882  
5.50 60 40 -26.01646  
5.25 60 40 -32.50219  
5.00 60 40 -37.25127  
4.75 60 40 -33.49813  
4.50 60 40 -4.46134  
4.25 60 40 87.86487  
4.00 60 40 323.66346  
3.75 60 40 860.58953  
3.50 60 40 1982.63413

3.25 60 40 4139.25032  
 3.00 60 40 7351.54343  
 2.75 60 40 8882.62887  
 2.50 60 40 9387.83524  
 2.25 60 40 9599.38796  
 100.00 60 50 -0.00000  
 50.00 60 50 -0.00000  
 40.00 60 50 -0.00001  
 30.00 60 50 -0.00004  
 25.00 60 50 -0.00012  
 20.00 60 50 -0.00052  
 18.00 60 50 -0.00106  
 16.00 60 50 -0.00242  
 14.00 60 50 -0.00647  
 13.00 60 50 -0.01167  
 12.00 60 50 -0.02349  
 11.00 60 50 -0.05517  
 10.50 60 50 -0.09007  
 10.00 60 50 -0.15254  
 9.75 60 50 -0.20068  
 9.50 60 50 -0.26544  
 9.25 60 50 -0.35243  
 9.00 60 50 -0.46895  
 8.75 60 50 -0.62442  
 8.50 60 50 -0.83074  
 8.25 60 50 -1.10287  
 8.00 60 50 -1.45933  
 7.75 60 50 -1.92291  
 7.50 60 50 -2.52161  
 7.25 60 50 -3.29025  
 7.00 60 50 -4.27305  
 6.75 60 50 -5.52827  
 6.50 60 50 -7.13534  
 6.25 60 50 -9.20484  
 6.00 60 50 -11.88814  
 5.75 60 50 -15.37570  
 5.50 60 50 -19.85302  
 5.25 60 50 -25.33947  
 5.00 60 50 -31.24482  
 4.75 60 50 -35.30036  
 4.50 60 50 -31.19534  
 4.25 60 50 -3.70548  
 4.00 60 50 80.64367  
 3.75 60 50 289.86988  
 3.50 60 50 751.05723  
 3.25 60 50 1677.75926  
 3.00 60 50 3378.34204  
 2.75 60 50 6150.33647  
 2.50 60 50 8308.66121  
 2.25 60 50 9115.80362  
 100.00 60 60 -0.00000  
 50.00 60 60 -0.00000  
 40.00 60 60 -0.00001  
 30.00 60 60 -0.00003  
 25.00 60 60 -0.00010  
 20.00 60 60 -0.00045  
 18.00 60 60 -0.00092  
 16.00 60 60 -0.00210  
 14.00 60 60 -0.00560  
 13.00 60 60 -0.01000  
 12.00 60 60 -0.01976  
 11.00 60 60 -0.04513  
 10.50 60 60 -0.07258  
 10.00 60 60 -0.12132  
 9.75 60 60 -0.15876  
 9.50 60 60 -0.20907  
 9.25 60 60 -0.27665  
 9.00 60 60 -0.36730  
 8.75 60 60 -0.48851  
 8.50 60 60 -0.64988  
 8.25 60 60 -0.86359  
 8.00 60 60 -1.14481  
 7.75 60 60 -1.51236  
 7.50 60 60 -1.98936  
 7.25 60 60 -2.60428  
 7.00 60 60 -3.39258  
 6.75 60 60 -4.39952  
 6.50 60 60 -5.68473  
 6.25 60 60 -7.32940  
 6.00 60 60 -9.44567  
 5.75 60 60 -12.18524  
 5.50 60 60 -15.73591  
 5.25 60 60 -20.27683  
 5.00 60 60 -25.82331  
 4.75 60 60 -31.81314  
 4.50 60 60 -36.13531  
 4.25 60 60 -33.03728  
 4.00 60 60 -8.93068  
 3.75 60 60 65.40640  
 3.50 60 60 248.04616  
 3.25 60 60 645.62542  
 3.00 60 60 1437.69784  
 2.75 60 60 2899.96430  
 2.50 60 60 5424.91197  
 2.25 60 60 8074.99059  
 100.00 60 70 -0.00000  
 50.00 60 70 -0.00000  
 40.00 60 70 -0.00000  
 30.00 60 70 -0.00003  
 25.00 60 70 -0.00009  
 20.00 60 70 -0.00039  
 18.00 60 70 -0.00081  
 16.00 60 70 -0.00185

14.00 60 70 -0.00492  
 13.00 60 70 -0.00872  
 12.00 60 70 -0.01689  
 11.00 60 70 -0.03734  
 10.50 60 70 -0.05892  
 10.00 60 70 -0.09672  
 9.75 60 70 -0.12557  
 9.50 60 70 -0.16423  
 9.25 60 70 -0.21610  
 9.00 60 70 -0.28569  
 8.75 60 70 -0.37891  
 8.50 60 70 -0.50342  
 8.25 60 70 -0.66906  
 8.00 60 70 -0.88832  
 7.75 60 70 -1.17689  
 7.50 60 70 -1.55432  
 7.25 60 70 -2.04493  
 7.00 60 70 -2.67904  
 6.75 60 70 -3.49502  
 6.50 60 70 -4.54255  
 6.25 60 70 -5.88791  
 6.00 60 70 -7.62185  
 5.75 60 70 -9.86996  
 5.50 60 70 -12.80207  
 5.25 60 70 -16.62991  
 5.00 60 70 -21.56370  
 4.75 60 70 -27.66006  
 4.50 60 70 -34.41454  
 4.25 60 70 -39.80127  
 4.00 60 70 -38.18736  
 3.75 60 70 -16.08507  
 3.50 60 70 56.01895  
 3.25 60 70 238.55789  
 3.00 60 70 648.81984  
 2.75 60 70 1505.05832  
 2.50 60 70 3202.57451  
 2.25 60 70 6359.67197  
 100.00 60 80 -0.00000  
 50.00 60 80 -0.00000  
 40.00 60 80 -0.00000  
 30.00 60 80 -0.00002  
 25.00 60 80 -0.00008  
 20.00 60 80 -0.00035  
 18.00 60 80 -0.00074  
 16.00 60 80 -0.00169  
 14.00 60 80 -0.00449  
 13.00 60 80 -0.00788  
 12.00 60 80 -0.01498  
 11.00 60 80 -0.03196  
 10.50 60 80 -0.04932  
 10.00 60 80 -0.07914  
 9.75 60 80 -0.10164  
 9.50 60 80 -0.13164  
 9.25 60 80 -0.17175  
 9.00 60 80 -0.22546  
 8.75 60 80 -0.29742  
 8.50 60 80 -0.39373  
 8.25 60 80 -0.52234  
 8.00 60 80 -0.69357  
 7.75 60 80 -0.92058  
 7.50 60 80 -1.22019  
 7.25 60 80 -1.61368  
 7.00 60 80 -2.12805  
 6.75 60 80 -2.79776  
 6.50 60 80 -3.66746  
 6.25 60 80 -4.79621  
 6.00 60 80 -6.26394  
 5.75 60 80 -8.18075  
 5.50 60 80 -10.69822  
 5.25 60 80 -14.01842  
 5.00 60 80 -18.38608  
 4.75 60 80 -24.02651  
 4.50 60 80 -30.94086  
 4.25 60 80 -38.36480  
 4.00 60 80 -43.48410  
 3.75 60 80 -38.59155  
 3.50 60 80 -5.09968  
 3.25 60 80 98.60617  
 3.00 60 80 361.18089  
 2.75 60 80 965.02334  
 2.50 60 80 2275.59740  
 2.25 60 80 5004.78645  
 100.00 60 90 -0.00000  
 50.00 60 90 -0.00000  
 40.00 60 90 -0.00000  
 30.00 60 90 -0.00002  
 25.00 60 90 -0.00008  
 20.00 60 90 -0.00034  
 18.00 60 90 -0.00071  
 16.00 60 90 -0.00164  
 14.00 60 90 -0.00433  
 13.00 60 90 -0.00754  
 12.00 60 90 -0.01406  
 11.00 60 90 -0.02899  
 10.50 60 90 -0.04371  
 10.00 60 90 -0.06836  
 9.75 60 90 -0.08668  
 9.50 60 90 -0.11089  
 9.25 60 90 -0.14304  
 9.00 60 90 -0.18590  
 8.75 60 90 -0.24319  
 8.50 60 90 -0.31984  
 8.25 60 90 -0.42244

8.00 60 90 -0.55965  
7.75 60 90 -0.74283  
7.50 60 90 -0.98680  
7.25 60 90 -1.31084  
7.00 60 90 -1.74002  
6.75 60 90 -2.30702  
6.50 60 90 -3.05484  
6.25 60 90 -4.04069  
6.00 60 90 -5.34176  
5.75 60 90 -7.06337  
5.50 60 90 -9.34933  
5.25 60 90 -12.39207  
5.00 60 90 -16.43294  
4.75 60 90 -21.72670  
4.50 60 90 -28.40551  
4.25 60 90 -36.09302  
4.00 60 90 -42.94208  
3.75 60 90 -43.40613  
3.50 60 90 -23.32379  
3.25 60 90 50.57828  
3.00 60 90 252.68533  
2.75 60 90 744.17927  
2.50 60 90 1866.86084  
2.25 60 90 4329.04962  
100.00 60 100 -0.00000  
50.00 60 100 -0.00000  
40.00 60 100 -0.00000  
30.00 60 100 -0.00002  
25.00 60 100 -0.00008  
20.00 60 100 -0.00037  
18.00 60 100 -0.00076  
16.00 60 100 -0.00173  
14.00 60 100 -0.00451  
13.00 60 100 -0.00778  
12.00 60 100 -0.01427  
11.00 60 100 -0.02854  
10.50 60 100 -0.04211  
10.00 60 100 -0.06422  
9.75 60 100 -0.08036  
9.50 60 100 -0.10146  
9.25 60 100 -0.12923  
9.00 60 100 -0.16599  
8.75 60 100 -0.21488  
8.50 60 100 -0.28017  
8.25 60 100 -0.36760  
8.00 60 100 -0.48493  
7.75 60 100 -0.64254  
7.50 60 100 -0.85438  
7.25 60 100 -1.13909  
7.00 60 100 -1.52161  
6.75 60 100 -2.03538  
6.50 60 100 -2.72533  
6.25 60 100 -3.65212  
6.00 60 100 -4.89806  
5.75 60 100 -6.57487  
5.50 60 100 -8.83345  
5.25 60 100 -11.87301  
5.00 60 100 -15.94233  
4.75 60 100 -21.31205  
4.50 60 100 -28.16588  
4.25 60 100 -36.28845  
4.00 60 100 -44.27543  
3.75 60 100 -47.66313  
3.50 60 100 -34.66974  
3.25 60 100 23.30423  
3.00 60 100 192.73534  
2.75 60 100 624.76849  
2.50 60 100 1658.99956  
2.25 60 100 4047.79220  
100.00 60 110 -0.00000  
50.00 60 110 -0.00000  
40.00 60 110 -0.00000  
30.00 60 110 -0.00003  
25.00 60 110 -0.00010  
20.00 60 110 -0.00043  
18.00 60 110 -0.00088  
16.00 60 110 -0.00199  
14.00 60 110 -0.00512  
13.00 60 110 -0.00875  
12.00 60 110 -0.01585  
11.00 60 110 -0.03099  
10.50 60 110 -0.04498  
10.00 60 110 -0.06727  
9.75 60 110 -0.08329  
9.50 60 110 -0.10403  
9.25 60 110 -0.13110  
9.00 60 110 -0.16671  
8.75 60 110 -0.21388  
8.50 60 110 -0.27678  
8.25 60 110 -0.36113  
8.00 60 110 -0.47483  
7.75 60 110 -0.62869  
7.50 60 110 -0.83763  
7.25 60 110 -1.12209  
7.00 60 110 -1.51013  
6.75 60 110 -2.04020  
6.50 60 110 -2.76487  
6.25 60 110 -3.75585  
6.00 60 110 -5.11055  
5.75 60 110 -6.96026  
5.50 60 110 -9.47930  
5.25 60 110 -12.89267  
5.00 60 110 -17.47468

4.75 60 110 -23.51947  
 4.50 60 110 -31.23746  
 4.25 60 110 -40.47082  
 4.00 60 110 -49.98283  
 3.75 60 110 -55.75989  
 3.50 60 110 -47.02544  
 3.25 60 110 3.11086  
 3.00 60 110 159.79011  
 2.75 60 110 579.31445  
 2.50 60 110 1635.27438  
 2.25 60 110 4210.17732  
 100.00 60 120 -0.00000  
 50.00 60 120 -0.00000  
 40.00 60 120 -0.00001  
 30.00 60 120 -0.00004  
 25.00 60 120 -0.00012  
 20.00 60 120 -0.00054  
 18.00 60 120 -0.00109  
 16.00 60 120 -0.00245  
 14.00 60 120 -0.00626  
 13.00 60 120 -0.01066  
 12.00 60 120 -0.01919  
 11.00 60 120 -0.03715  
 10.50 60 120 -0.05352  
 10.00 60 120 -0.07938  
 9.75 60 120 -0.09786  
 9.50 60 120 -0.12173  
 9.25 60 120 -0.15286  
 9.00 60 120 -0.19384  
 8.75 60 120 -0.24829  
 8.50 60 120 -0.32127  
 8.25 60 120 -0.41988  
 8.00 60 120 -0.55406  
 7.75 60 120 -0.73773  
 7.50 60 120 -0.99031  
 7.25 60 120 -1.33886  
 7.00 60 120 -1.82082  
 6.75 60 120 -2.48772  
 6.50 60 120 -3.40988  
 6.25 60 120 -4.68229  
 6.00 60 120 -6.43158  
 5.75 60 120 -8.82329  
 5.50 60 120 -12.06752  
 5.25 60 120 -16.41747  
 5.00 60 120 -22.14849  
 4.75 60 120 -29.48969  
 4.50 60 120 -38.44754  
 4.25 60 120 -48.39036  
 4.00 60 120 -57.10824  
 3.75 60 120 -58.70565  
 3.50 60 120 -38.81398  
 3.25 60 120 36.59773  
 3.00 60 120 248.25215  
 2.75 60 120 790.46956  
 2.50 60 120 2137.34554  
 2.25 60 120 5440.84503  
 100.00 60 130 -0.00000  
 50.00 60 130 -0.00000  
 40.00 60 130 -0.00001  
 30.00 60 130 -0.00005  
 25.00 60 130 -0.00016  
 20.00 60 130 -0.00069  
 18.00 60 130 -0.00139  
 16.00 60 130 -0.00313  
 14.00 60 130 -0.00802  
 13.00 60 130 -0.01369  
 12.00 60 130 -0.02474  
 11.00 60 130 -0.04815  
 10.50 60 130 -0.06969  
 10.00 60 130 -0.10407  
 9.75 60 130 -0.12892  
 9.50 60 130 -0.16133  
 9.25 60 130 -0.20406  
 9.00 60 130 -0.26105  
 8.75 60 130 -0.33785  
 8.50 60 130 -0.44235  
 8.25 60 130 -0.58571  
 8.00 60 130 -0.78368  
 7.75 60 130 -1.05839  
 7.50 60 130 -1.44066  
 7.25 60 130 -1.97301  
 7.00 60 130 -2.71344  
 6.75 60 130 -3.73987  
 6.50 60 130 -5.15510  
 6.25 60 130 -7.09140  
 6.00 60 130 -9.71279  
 5.75 60 130 -13.21010  
 5.50 60 130 -17.77833  
 5.25 60 130 -23.55340  
 5.00 60 130 -30.46272  
 4.75 60 130 -37.90183  
 4.50 60 130 -44.07781  
 4.25 60 130 -44.73834  
 4.00 60 130 -30.78673  
 3.75 60 130 16.17152  
 3.50 60 130 132.40373  
 3.25 60 130 389.65983  
 3.00 60 130 934.26972  
 2.75 60 130 2079.91991  
 2.50 60 130 4537.11472  
 2.25 60 130 8191.05003  
 100.00 60 140 -0.00000  
 50.00 60 140 -0.00000

40.00 60 140 -0.00001  
 30.00 60 140 -0.00006  
 25.00 60 140 -0.00020  
 20.00 60 140 -0.00087  
 18.00 60 140 -0.00178  
 16.00 60 140 -0.00402  
 14.00 60 140 -0.01040  
 13.00 60 140 -0.01791  
 12.00 60 140 -0.03277  
 11.00 60 140 -0.06509  
 10.50 60 140 -0.09571  
 10.00 60 140 -0.14606  
 9.75 60 140 -0.18339  
 9.50 60 140 -0.23305  
 9.25 60 140 -0.29991  
 9.00 60 140 -0.39097  
 8.75 60 140 -0.51620  
 8.50 60 140 -0.68983  
 8.25 60 140 -0.93198  
 8.00 60 140 -1.27085  
 7.75 60 140 -1.74550  
 7.50 60 140 -2.40918  
 7.25 60 140 -3.33308  
 7.00 60 140 -4.60997  
 6.75 60 140 -6.35637  
 6.50 60 140 -8.71015  
 6.25 60 140 -11.81646  
 6.00 60 140 -15.78577  
 5.75 60 140 -20.58920  
 5.50 60 140 -25.81908  
 5.25 60 140 -30.17657  
 5.00 60 140 -30.44440  
 4.75 60 140 -19.57239  
 4.50 60 140 16.60026  
 4.25 60 140 104.43767  
 4.00 60 140 289.68667  
 3.75 60 140 647.14774  
 3.50 60 140 1295.36045  
 3.25 60 140 2425.90125  
 3.00 60 140 4371.24100  
 2.75 60 140 7272.87806  
 2.50 60 140 8901.15008  
 2.25 60 140 9506.73146  
 100.00 60 150 -0.00000  
 50.00 60 150 -0.00000  
 40.00 60 150 -0.00001  
 30.00 60 150 -0.00007  
 25.00 60 150 -0.00024  
 20.00 60 150 -0.00107  
 18.00 60 150 -0.00220  
 16.00 60 150 -0.00502  
 14.00 60 150 -0.01321  
 13.00 60 150 -0.02303  
 12.00 60 150 -0.04290  
 11.00 60 150 -0.08784  
 10.50 60 150 -0.13220  
 10.00 60 150 -0.20809  
 9.75 60 150 -0.26614  
 9.50 60 150 -0.34511  
 9.25 60 150 -0.45379  
 9.00 60 150 -0.60481  
 8.75 60 150 -0.81629  
 8.50 60 150 -1.11386  
 8.25 60 150 -1.53344  
 8.00 60 150 -2.12445  
 7.75 60 150 -2.95353  
 7.50 60 150 -4.10785  
 7.25 60 150 -5.69655  
 7.00 60 150 -7.84632  
 6.75 60 150 -10.68155  
 6.50 60 150 -14.26681  
 6.25 60 150 -18.45899  
 6.00 60 150 -22.55079  
 5.75 60 150 -24.45087  
 5.50 60 150 -18.89173  
 5.25 60 150 6.25333  
 5.00 60 150 76.94899  
 4.75 60 150 244.79600  
 4.50 60 150 603.72837  
 4.25 60 150 1306.81371  
 4.00 60 150 2570.11819  
 3.75 60 150 4649.06313  
 3.50 60 150 7299.45941  
 3.25 60 150 8701.64986  
 3.00 60 150 9290.45937  
 2.75 60 150 9590.97729  
 2.50 60 150 9762.31018  
 2.25 60 150 9858.21305  
 100.00 60 160 -0.00000  
 50.00 60 160 -0.00000  
 40.00 60 160 -0.00001  
 30.00 60 160 -0.00009  
 25.00 60 160 -0.00028  
 20.00 60 160 -0.00125  
 18.00 60 160 -0.00259  
 16.00 60 160 -0.00598  
 14.00 60 160 -0.01599  
 13.00 60 160 -0.02823  
 12.00 60 160 -0.05358  
 11.00 60 160 -0.11329  
 10.50 60 160 -0.17475  
 10.00 60 160 -0.28381  
 9.75 60 160 -0.36955

9.50 60 160 -0.48831  
 9.25 60 160 -0.65450  
 9.00 60 160 -0.88880  
 8.75 60 160 -1.22071  
 8.50 60 160 -1.69160  
 8.25 60 160 -2.35849  
 8.00 60 160 -3.29794  
 7.75 60 160 -4.60891  
 7.50 60 160 -6.41167  
 7.25 60 160 -8.83501  
 7.00 60 160 -11.97286  
 6.75 60 160 -15.76269  
 6.50 60 160 -19.66719  
 6.25 60 160 -21.87353  
 6.00 60 160 -17.34471  
 5.75 60 160 6.74216  
 5.50 60 160 81.15257  
 5.25 60 160 275.69232  
 5.00 60 160 738.65639  
 4.75 60 160 1758.13275  
 4.50 60 160 3822.58331  
 4.25 60 160 7171.25778  
 4.00 60 160 8866.06277  
 3.75 60 160 9397.74401  
 3.50 60 160 9642.37879  
 3.25 60 160 9780.16220  
 3.00 60 160 9861.97509  
 2.75 60 160 9912.19673  
 2.50 60 160 9943.68090  
 2.25 60 160 9963.68472  
 100.00 60 170 -0.00000  
 50.00 60 170 -0.00000  
 40.00 60 170 -0.00001  
 30.00 60 170 -0.00009  
 25.00 60 170 -0.00031  
 20.00 60 170 -0.00138  
 18.00 60 170 -0.00288  
 16.00 60 170 -0.00668  
 14.00 60 170 -0.01808  
 13.00 60 170 -0.03222  
 12.00 60 170 -0.06203  
 11.00 60 170 -0.13441  
 10.50 60 170 -0.21120  
 10.00 60 170 -0.35095  
 9.75 60 170 -0.46276  
 9.50 60 170 -0.61936  
 9.25 60 170 -0.84063  
 9.00 60 170 -1.15505  
 8.75 60 170 -1.60298  
 8.50 60 170 -2.24053  
 8.25 60 170 -3.14381  
 8.00 60 170 -4.41223  
 7.75 60 170 -6.16794  
 7.50 60 170 -8.54319  
 7.25 60 170 -11.63465  
 7.00 60 170 -15.37007  
 6.75 60 170 -19.14454  
 6.50 60 170 -20.86067  
 6.25 60 170 -14.45864  
 6.00 60 170 16.26532  
 5.75 60 170 112.58154  
 5.50 60 170 375.06071  
 5.25 60 170 1036.05889  
 5.00 60 170 2591.85650  
 4.75 60 170 5937.54398  
 4.50 60 170 8710.21367  
 4.25 60 170 9434.53612  
 4.00 60 170 9713.17928  
 3.75 60 170 9847.07674  
 3.50 60 170 9916.30363  
 3.25 60 170 9953.54014  
 3.00 60 170 9974.00880  
 2.75 60 170 9985.39660  
 2.50 60 170 9991.77503  
 2.25 60 170 9995.36119  
 100.00 60 180 -0.00000  
 50.00 60 180 -0.00000  
 40.00 60 180 -0.00002  
 30.00 60 180 -0.00010  
 25.00 60 180 -0.00032  
 20.00 60 180 -0.00143  
 18.00 60 180 -0.00298  
 16.00 60 180 -0.00694  
 14.00 60 180 -0.01887  
 13.00 60 180 -0.03373  
 12.00 60 180 -0.06528  
 11.00 60 180 -0.14278  
 10.50 60 180 -0.22589  
 10.00 60 180 -0.37850  
 9.75 60 180 -0.50131  
 9.50 60 180 -0.67397  
 9.25 60 180 -0.91867  
 9.00 60 180 -1.26723  
 8.75 60 180 -1.76460  
 8.50 60 180 -2.47301  
 8.25 60 180 -3.47627  
 8.00 60 180 -4.88244  
 7.75 60 180 -6.82073  
 7.50 60 180 -9.42105  
 7.25 60 180 -12.74621  
 7.00 60 180 -16.59703  
 6.75 60 180 -19.97982  
 6.50 60 180 -19.68929

6.25 60 180 -6.61997  
6.00 60 180 43.58607  
5.75 60 180 193.43309  
5.50 60 180 596.76760  
5.25 60 180 1611.87193  
5.00 60 180 4000.39471  
4.75 60 180 7900.61029  
4.50 60 180 9253.37450  
4.25 60 180 9651.45982  
4.00 60 180 9825.25986  
3.75 60 180 9909.24976  
3.50 60 180 9952.01248  
3.25 60 180 9974.38445  
3.00 60 180 9986.25794  
2.75 60 180 9992.60801  
2.50 60 180 9996.01806  
2.25 60 180 9997.85334  
100.00 70 0 -0.00000  
50.00 70 0 -0.00000  
40.00 70 0 -0.00001  
30.00 70 0 -0.00006  
25.00 70 0 -0.00019  
20.00 70 0 -0.00080  
18.00 70 0 -0.00163  
16.00 70 0 -0.00374  
14.00 70 0 -0.01036  
13.00 70 0 -0.01937  
12.00 70 0 -0.04112  
11.00 70 0 -0.10290  
10.50 70 0 -0.17313  
10.00 70 0 -0.30114  
9.75 70 0 -0.40096  
9.50 70 0 -0.53638  
9.25 70 0 -0.72011  
9.00 70 0 -0.96931  
8.75 70 0 -1.30728  
8.50 70 0 -1.76604  
8.25 70 0 -2.39025  
8.00 70 0 -3.24338  
7.75 70 0 -4.41703  
7.50 70 0 -6.04342  
7.25 70 0 -8.30692  
7.00 70 0 -11.43608  
6.75 70 0 -15.61641  
6.50 70 0 -20.65429  
6.25 70 0 -24.94782  
6.00 70 0 -22.66597  
5.75 70 0 3.45008  
5.50 70 0 99.48087  
5.25 70 0 380.41160  
5.00 70 0 1118.53187  
4.75 70 0 2931.14102  
4.50 70 0 6911.09834  
4.25 70 0 9182.15976  
4.00 70 0 9719.58977  
3.75 70 0 9891.57014  
3.50 70 0 9956.13496  
3.25 70 0 9981.93370  
3.00 70 0 9992.50458  
2.75 70 0 9996.88086  
2.50 70 0 9998.70037  
2.25 70 0 9999.45821  
100.00 70 10 -0.00000  
50.00 70 10 -0.00000  
40.00 70 10 -0.00001  
30.00 70 10 -0.00006  
25.00 70 10 -0.00018  
20.00 70 10 -0.00078  
18.00 70 10 -0.00159  
16.00 70 10 -0.00366  
14.00 70 10 -0.01010  
13.00 70 10 -0.01882  
12.00 70 10 -0.03983  
11.00 70 10 -0.09926  
10.50 70 10 -0.16669  
10.00 70 10 -0.28936  
9.75 70 10 -0.38488  
9.50 70 10 -0.51428  
9.25 70 10 -0.68952  
9.00 70 10 -0.92664  
8.75 70 10 -1.24720  
8.50 70 10 -1.68050  
8.25 70 10 -2.26680  
8.00 70 10 -3.06253  
7.75 70 10 -4.14812  
7.50 70 10 -5.63916  
7.25 70 10 -7.69873  
7.00 70 10 -10.53971  
6.75 70 10 -14.37903  
6.50 70 10 -19.23460  
6.25 70 10 -24.27954  
6.00 70 10 -26.05966  
5.75 70 10 -13.98231  
5.50 70 10 40.35803  
5.25 70 10 206.94028  
5.00 70 10 646.93105  
4.75 70 10 1708.82780  
4.50 70 10 4098.05054  
4.25 70 10 7917.11915  
4.00 70 10 9308.43584  
3.75 70 10 9718.14612  
3.50 70 10 9874.89378  
3.25 70 10 9942.37485

3.00 70 10 9973.00863  
 2.75 70 10 9987.25862  
 2.50 70 10 9993.96335  
 2.25 70 10 9997.13499  
 100.00 70 20 -0.00000  
 50.00 70 20 -0.00000  
 40.00 70 20 -0.00001  
 30.00 70 20 -0.00006  
 25.00 70 20 -0.00017  
 20.00 70 20 -0.00073  
 18.00 70 20 -0.00150  
 16.00 70 20 -0.00342  
 14.00 70 20 -0.00937  
 13.00 70 20 -0.01735  
 12.00 70 20 -0.03634  
 11.00 70 20 -0.08957  
 10.50 70 20 -0.14960  
 10.00 70 20 -0.25838  
 9.75 70 20 -0.34280  
 9.50 70 20 -0.45683  
 9.25 70 20 -0.61067  
 9.00 70 20 -0.81780  
 8.75 70 20 -1.09598  
 8.50 70 20 -1.46863  
 8.25 70 20 -1.96685  
 8.00 70 20 -2.63245  
 7.75 70 20 -3.52279  
 7.50 70 20 -4.71802  
 7.25 70 20 -6.33139  
 7.00 70 20 -8.52035  
 6.75 70 20 -11.48854  
 6.50 70 20 -15.44627  
 6.25 70 20 -20.44237  
 6.00 70 20 -25.85592  
 5.75 70 20 -29.07670  
 5.50 70 20 -22.40353  
 5.25 70 20 13.66629  
 5.00 70 20 123.82325  
 4.75 70 20 402.34460  
 4.50 70 20 1032.95067  
 4.25 70 20 2345.43400  
 4.00 70 20 4884.04507  
 3.75 70 20 8036.11404  
 3.50 70 20 9203.48420  
 3.25 70 20 9615.78142  
 3.00 70 20 9801.80537  
 2.75 70 20 9894.02896  
 2.50 70 20 9942.25933  
 2.25 70 20 9968.21699  
 100.00 70 30 -0.00000  
 50.00 70 30 -0.00000  
 40.00 70 30 -0.00001  
 30.00 70 30 -0.00005  
 25.00 70 30 -0.00016  
 20.00 70 30 -0.00067  
 18.00 70 30 -0.00135  
 16.00 70 30 -0.00309  
 14.00 70 30 -0.00836  
 13.00 70 30 -0.01531  
 12.00 70 30 -0.03161  
 11.00 70 30 -0.07659  
 10.50 70 30 -0.12692  
 10.00 70 30 -0.21770  
 9.75 70 30 -0.28793  
 9.50 70 30 -0.38257  
 9.25 70 30 -0.50989  
 9.00 70 30 -0.68071  
 8.75 70 30 -0.90898  
 8.50 70 30 -1.21268  
 8.25 70 30 -1.61481  
 8.00 70 30 -2.14486  
 7.75 70 30 -2.84109  
 7.50 70 30 -3.75401  
 7.25 70 30 -4.95202  
 7.00 70 30 -6.52978  
 6.75 70 30 -8.61892  
 6.50 70 30 -11.39606  
 6.25 70 30 -15.07136  
 6.00 70 30 -19.81124  
 5.75 70 30 -25.48566  
 5.50 70 30 -31.00178  
 5.25 70 30 -32.74694  
 5.00 70 30 -21.25235  
 4.75 70 30 25.46470  
 4.50 70 30 154.37813  
 4.25 70 30 459.53315  
 4.00 70 30 1118.98211  
 3.75 70 30 2452.32142  
 3.50 70 30 4998.80635  
 3.25 70 30 8069.78613  
 3.00 70 30 9195.60092  
 2.75 70 30 9586.32633  
 2.50 70 30 9766.10683  
 2.25 70 30 9863.67736  
 100.00 70 40 -0.00000  
 50.00 70 40 -0.00000  
 40.00 70 40 -0.00001  
 30.00 70 40 -0.00004  
 25.00 70 40 -0.00014  
 20.00 70 40 -0.00059  
 18.00 70 40 -0.00119  
 16.00 70 40 -0.00271  
 14.00 70 40 -0.00725

13.00 70 40 -0.01313  
 12.00 70 40 -0.02662  
 11.00 70 40 -0.06311  
 10.50 70 40 -0.10351  
 10.00 70 40 -0.17604  
 9.75 70 40 -0.23202  
 9.50 70 40 -0.30738  
 9.25 70 40 -0.40868  
 9.00 70 40 -0.54447  
 8.75 70 40 -0.72574  
 8.50 70 40 -0.96649  
 8.25 70 40 -1.28431  
 8.00 70 40 -1.70116  
 7.75 70 40 -2.24439  
 7.50 70 40 -2.94824  
 7.25 70 40 -3.85637  
 7.00 70 40 -5.02610  
 6.75 70 40 -6.53518  
 6.50 70 40 -8.49153  
 6.25 70 40 -11.04388  
 6.00 70 40 -14.38407  
 5.75 70 40 -18.71432  
 5.50 70 40 -24.11330  
 5.25 70 40 -30.15403  
 5.00 70 40 -34.97042  
 4.75 70 40 -33.18656  
 4.50 70 40 -11.64909  
 4.25 70 40 58.79963  
 4.00 70 40 238.05778  
 3.75 70 40 640.64535  
 3.50 70 40 1468.30306  
 3.25 70 40 3039.37915  
 3.00 70 40 5762.43160  
 2.75 70 40 8221.67158  
 2.50 70 40 9113.14538  
 2.25 70 40 9460.95481  
 100.00 70 50 -0.00000  
 50.00 70 50 -0.00000  
 40.00 70 50 -0.00001  
 30.00 70 50 -0.00004  
 25.00 70 50 -0.00012  
 20.00 70 50 -0.00051  
 18.00 70 50 -0.00103  
 16.00 70 50 -0.00234  
 14.00 70 50 -0.00621  
 13.00 70 50 -0.01111  
 12.00 70 50 -0.02210  
 11.00 70 50 -0.05102  
 10.50 70 50 -0.08258  
 10.00 70 50 -0.13885  
 9.75 70 50 -0.18219  
 9.50 70 50 -0.24048  
 9.25 70 50 -0.31887  
 9.00 70 50 -0.42404  
 8.75 70 50 -0.56466  
 8.50 70 50 -0.75178  
 8.25 70 50 -0.99935  
 8.00 70 50 -1.32469  
 7.75 70 50 -1.74917  
 7.50 70 50 -2.29897  
 7.25 70 50 -3.00636  
 7.00 70 50 -3.91175  
 6.75 70 50 -5.06737  
 6.50 70 50 -6.54334  
 6.25 70 50 -8.43691  
 6.00 70 50 -10.88370  
 5.75 70 50 -14.06504  
 5.50 70 50 -18.19239  
 5.25 70 50 -23.42144  
 5.00 70 50 -29.59005  
 4.75 70 50 -35.56303  
 4.50 70 50 -37.77195  
 4.25 70 50 -27.23202  
 4.00 70 50 16.07465  
 3.75 70 50 132.82716  
 3.50 70 50 398.84969  
 3.25 70 50 942.52553  
 3.00 70 50 1956.64430  
 2.75 70 50 3688.74189  
 2.50 70 50 6324.29991  
 2.25 70 50 8309.70188  
 100.00 70 60 -0.00000  
 50.00 70 60 -0.00000  
 40.00 70 60 -0.00001  
 30.00 70 60 -0.00003  
 25.00 70 60 -0.00010  
 20.00 70 60 -0.00043  
 18.00 70 60 -0.00089  
 16.00 70 60 -0.00202  
 14.00 70 60 -0.00533  
 13.00 70 60 -0.00945  
 12.00 70 60 -0.01842  
 11.00 70 60 -0.04124  
 10.50 70 60 -0.06563  
 10.00 70 60 -0.10869  
 9.75 70 60 -0.14170  
 9.50 70 60 -0.18603  
 9.25 70 60 -0.24563  
 9.00 70 60 -0.32567  
 8.75 70 60 -0.43292  
 8.50 70 60 -0.57613  
 8.25 70 60 -0.76641  
 8.00 70 60 -1.01776

7.75 70 60 -1.34758  
7.50 70 60 -1.77730  
7.25 70 60 -2.33321  
7.00 70 60 -3.04773  
6.75 70 60 -3.96157  
6.50 70 60 -5.12745  
6.25 70 60 -6.61631  
6.00 70 60 -8.52683  
5.75 70 60 -10.99790  
5.50 70 60 -14.21952  
5.25 70 60 -18.42824  
5.00 70 60 -23.85071  
4.75 70 60 -30.51545  
4.50 70 60 -37.77090  
4.25 70 60 -43.20768  
4.00 70 60 -40.47027  
3.75 70 60 -15.17286  
3.50 70 60 62.09076  
3.25 70 60 246.61288  
3.00 70 60 634.89137  
2.75 70 60 1385.64355  
2.50 70 60 2756.16375  
2.25 70 60 5196.46916  
100.00 70 70 -0.00000  
50.00 70 70 -0.00000  
40.00 70 70 -0.00000  
30.00 70 70 -0.00003  
25.00 70 70 -0.00009  
20.00 70 70 -0.00038  
18.00 70 70 -0.00078  
16.00 70 70 -0.00178  
14.00 70 70 -0.00468  
13.00 70 70 -0.00823  
12.00 70 70 -0.01572  
11.00 70 70 -0.03404  
10.50 70 70 -0.05308  
10.00 70 70 -0.08618  
9.75 70 70 -0.11135  
9.50 70 70 -0.14503  
9.25 70 70 -0.19021  
9.00 70 70 -0.25087  
8.75 70 70 -0.33224  
8.50 70 70 -0.44120  
8.25 70 70 -0.58659  
8.00 70 70 -0.77977  
7.75 70 70 -1.03505  
7.50 70 70 -1.37038  
7.25 70 70 -1.80807  
7.00 70 70 -2.37585  
6.75 70 70 -3.10837  
6.50 70 70 -4.04985  
6.25 70 70 -5.25825  
6.00 70 70 -6.81228  
5.75 70 70 -8.82200  
5.50 70 70 -11.44292  
5.25 70 70 -14.89044  
5.00 70 70 -19.44250  
4.75 70 70 -25.39974  
4.50 70 70 -32.93282  
4.25 70 70 -41.67183  
4.00 70 70 -49.75433  
3.75 70 70 -51.80853  
3.50 70 70 -34.93329  
3.25 70 70 29.00338  
3.00 70 70 197.92189  
2.75 70 70 587.64031  
2.50 70 70 1428.98885  
2.25 70 70 3188.90269  
100.00 70 80 -0.00000  
50.00 70 80 -0.00000  
40.00 70 80 -0.00000  
30.00 70 80 -0.00002  
25.00 70 80 -0.00008  
20.00 70 80 -0.00034  
18.00 70 80 -0.00071  
16.00 70 80 -0.00163  
14.00 70 80 -0.00429  
13.00 70 80 -0.00747  
12.00 70 80 -0.01402  
11.00 70 80 -0.02934  
10.50 70 80 -0.04474  
10.00 70 80 -0.07093  
9.75 70 80 -0.09060  
9.50 70 80 -0.11674  
9.25 70 80 -0.15164  
9.00 70 80 -0.19836  
8.75 70 80 -0.26097  
8.50 70 80 -0.34488  
8.25 70 80 -0.45718  
8.00 70 80 -0.60711  
7.75 70 80 -0.80659  
7.50 70 80 -1.07085  
7.25 70 80 -1.41926  
7.00 70 80 -1.87637  
6.75 70 80 -2.47333  
6.50 70 80 -3.25001  
6.25 70 80 -4.25842  
6.00 70 80 -5.56796  
5.75 70 80 -7.27373  
5.50 70 80 -9.50859  
5.25 70 80 -12.45871  
5.00 70 80 -16.37829  
4.75 70 80 -21.58909

4.50 70 80 -28.42676  
 4.25 70 80 -37.04466  
 4.00 70 80 -46.87806  
 3.75 70 80 -55.34964  
 3.50 70 80 -54.93928  
 3.25 70 80 -26.78156  
 3.00 70 80 73.11507  
 2.75 70 80 343.45306  
 2.50 70 80 1000.95404  
 2.25 70 80 2512.44741  
 100.00 70 90 -0.00000  
 50.00 70 90 -0.00000  
 40.00 70 90 -0.00000  
 30.00 70 90 -0.00002  
 25.00 70 90 -0.00007  
 20.00 70 90 -0.00034  
 18.00 70 90 -0.00070  
 16.00 70 90 -0.00160  
 14.00 70 90 -0.00418  
 13.00 70 90 -0.00722  
 12.00 70 90 -0.01333  
 11.00 70 90 -0.02701  
 10.50 70 90 -0.04028  
 10.00 70 90 -0.06226  
 9.75 70 90 -0.07849  
 9.50 70 90 -0.09986  
 9.25 70 90 -0.12815  
 9.00 70 90 -0.16580  
 8.75 70 90 -0.21606  
 8.50 70 90 -0.28330  
 8.25 70 90 -0.37337  
 8.00 70 90 -0.49401  
 7.75 70 90 -0.65541  
 7.50 70 90 -0.87093  
 7.25 70 90 -1.15802  
 7.00 70 90 -1.53933  
 6.75 70 90 -2.04439  
 6.50 70 90 -2.71173  
 6.25 70 90 -3.59215  
 6.00 70 90 -4.75345  
 5.75 70 90 -6.28751  
 5.50 70 90 -8.32029  
 5.25 70 90 -11.02505  
 5.00 70 90 -14.63622  
 4.75 70 90 -19.45443  
 4.50 70 90 -25.81529  
 4.25 70 90 -33.95240  
 4.00 70 90 -43.58884  
 3.75 70 90 -52.87736  
 3.50 70 90 -55.83366  
 3.25 70 90 -36.35015  
 3.00 70 90 45.47800  
 2.75 70 90 284.15669  
 2.50 70 90 896.87560  
 2.25 70 90 2367.87160  
 100.00 70 100 -0.00000  
 50.00 70 100 -0.00000  
 40.00 70 100 -0.00000  
 30.00 70 100 -0.00002  
 25.00 70 100 -0.00008  
 20.00 70 100 -0.00036  
 18.00 70 100 -0.00075  
 16.00 70 100 -0.00171  
 14.00 70 100 -0.00441  
 13.00 70 100 -0.00756  
 12.00 70 100 -0.01375  
 11.00 70 100 -0.02712  
 10.50 70 100 -0.03965  
 10.00 70 100 -0.05986  
 9.75 70 100 -0.07451  
 9.50 70 100 -0.09357  
 9.25 70 100 -0.11857  
 9.00 70 100 -0.15156  
 8.75 70 100 -0.19534  
 8.50 70 100 -0.25372  
 8.25 70 100 -0.33185  
 8.00 70 100 -0.43669  
 7.75 70 100 -0.57764  
 7.50 70 100 -0.76732  
 7.25 70 100 -1.02265  
 7.00 70 100 -1.36632  
 6.75 70 100 -1.82869  
 6.50 70 100 -2.45043  
 6.25 70 100 -3.28621  
 6.00 70 100 -4.40970  
 5.75 70 100 -5.92054  
 5.50 70 100 -7.95349  
 5.25 70 100 -10.68960  
 5.00 70 100 -14.36682  
 4.75 70 100 -19.28127  
 4.50 70 100 -25.75470  
 4.25 70 100 -34.00488  
 4.00 70 100 -43.76333  
 3.75 70 100 -53.26752  
 3.50 70 100 -56.74539  
 3.25 70 100 -38.32127  
 3.00 70 100 42.47842  
 2.75 70 100 284.64503  
 2.50 70 100 923.15068  
 2.25 70 100 2497.71518  
 100.00 70 110 -0.00000  
 50.00 70 110 -0.00000  
 40.00 70 110 -0.00000

30.00 70 110 -0.00003  
 25.00 70 110 -0.00010  
 20.00 70 110 -0.00043  
 18.00 70 110 -0.00088  
 16.00 70 110 -0.00198  
 14.00 70 110 -0.00507  
 13.00 70 110 -0.00863  
 12.00 70 110 -0.01552  
 11.00 70 110 -0.03004  
 10.50 70 110 -0.04332  
 10.00 70 110 -0.06429  
 9.75 70 110 -0.07927  
 9.50 70 110 -0.09859  
 9.25 70 110 -0.12372  
 9.00 70 110 -0.15668  
 8.75 70 110 -0.20023  
 8.50 70 110 -0.25819  
 8.25 70 110 -0.33582  
 8.00 70 110 -0.44038  
 7.75 70 110 -0.58187  
 7.50 70 110 -0.77406  
 7.25 70 110 -1.03590  
 7.00 70 110 -1.39342  
 6.75 70 110 -1.88224  
 6.50 70 110 -2.55101  
 6.25 70 110 -3.46592  
 6.00 70 110 -4.71656  
 5.75 70 110 -6.42332  
 5.50 70 110 -8.74608  
 5.25 70 110 -11.89299  
 5.00 70 110 -16.12533  
 4.75 70 110 -21.74747  
 4.50 70 110 -29.05438  
 4.25 70 110 -38.16817  
 4.00 70 110 -48.59621  
 3.75 70 110 -58.10164  
 3.50 70 110 -59.88623  
 3.25 70 110 -35.64394  
 3.00 70 110 61.42932  
 2.75 70 110 347.68308  
 2.50 70 110 1105.76175  
 2.25 70 110 3001.85349  
 100.00 70 120 -0.00000  
 50.00 70 120 -0.00000  
 40.00 70 120 -0.00001  
 30.00 70 120 -0.00004  
 25.00 70 120 -0.00012  
 20.00 70 120 -0.00054  
 18.00 70 120 -0.00110  
 16.00 70 120 -0.00246  
 14.00 70 120 -0.00625  
 13.00 70 120 -0.01061  
 12.00 70 120 -0.01902  
 11.00 70 120 -0.03658  
 10.50 70 120 -0.05249  
 10.00 70 120 -0.07747  
 9.75 70 120 -0.09526  
 9.50 70 120 -0.11818  
 9.25 70 120 -0.14800  
 9.00 70 120 -0.18718  
 8.75 70 120 -0.23915  
 8.50 70 120 -0.30872  
 8.25 70 120 -0.40265  
 8.00 70 120 -0.53037  
 7.75 70 120 -0.70518  
 7.50 70 120 -0.94559  
 7.25 70 120 -1.27743  
 7.00 70 120 -1.73644  
 6.75 70 120 -2.37174  
 6.50 70 120 -3.25029  
 6.25 70 120 -4.46231  
 6.00 70 120 -6.12768  
 5.75 70 120 -8.40256  
 5.50 70 120 -11.48444  
 5.25 70 120 -15.61115  
 5.00 70 120 -21.04309  
 4.75 70 120 -28.00555  
 4.50 70 120 -36.54004  
 4.25 70 120 -46.15354  
 4.00 70 120 -55.01989  
 3.75 70 120 -58.17363  
 3.50 70 120 -43.37795  
 3.25 70 120 18.52931  
 3.00 70 120 196.66768  
 2.75 70 120 655.70890  
 2.50 70 120 1789.25101  
 2.25 70 120 4529.22993  
 100.00 70 130 -0.00000  
 50.00 70 130 -0.00000  
 40.00 70 130 -0.00001  
 30.00 70 130 -0.00005  
 25.00 70 130 -0.00016  
 20.00 70 130 -0.00069  
 18.00 70 130 -0.00140  
 16.00 70 130 -0.00315  
 14.00 70 130 -0.00804  
 13.00 70 130 -0.01370  
 12.00 70 130 -0.02469  
 11.00 70 130 -0.04788  
 10.50 70 130 -0.06914  
 10.00 70 130 -0.10299  
 9.75 70 130 -0.12741  
 9.50 70 130 -0.15921

9.25 70 130 -0.20112  
 9.00 70 130 -0.25695  
 8.75 70 130 -0.33215  
 8.50 70 130 -0.43442  
 8.25 70 130 -0.57468  
 8.00 70 130 -0.76834  
 7.75 70 130 -1.03705  
 7.50 70 130 -1.41097  
 7.25 70 130 -1.93170  
 7.00 70 130 -2.65590  
 6.75 70 130 -3.65965  
 6.50 70 130 -5.04308  
 6.25 70 130 -6.93468  
 6.00 70 130 -9.49305  
 5.75 70 130 -12.90147  
 5.50 70 130 -17.34454  
 5.25 70 130 -22.94473  
 5.00 70 130 -29.61369  
 4.75 70 130 -36.73245  
 4.50 70 130 -42.50420  
 4.25 70 130 -42.70435  
 4.00 70 130 -28.33955  
 3.75 70 130 18.70742  
 3.50 70 130 133.98807  
 3.25 70 130 387.24065  
 3.00 70 130 918.48009  
 2.75 70 130 2020.41416  
 2.50 70 130 4334.51866  
 2.25 70 130 7980.35578  
 100.00 70 140 -0.00000  
 50.00 70 140 -0.00000  
 40.00 70 140 -0.00001  
 30.00 70 140 -0.00006  
 25.00 70 140 -0.00020  
 20.00 70 140 -0.00088  
 18.00 70 140 -0.00179  
 16.00 70 140 -0.00404  
 14.00 70 140 -0.01044  
 13.00 70 140 -0.01795  
 12.00 70 140 -0.03279  
 11.00 70 140 -0.06502  
 10.50 70 140 -0.09549  
 10.00 70 140 -0.14555  
 9.75 70 140 -0.18264  
 9.50 70 140 -0.23197  
 9.25 70 140 -0.29835  
 9.00 70 140 -0.38874  
 8.75 70 140 -0.51303  
 8.50 70 140 -0.68533  
 8.25 70 140 -0.92561  
 8.00 70 140 -1.26184  
 7.75 70 140 -1.73278  
 7.50 70 140 -2.39122  
 7.25 70 140 -3.30772  
 7.00 70 140 -4.57413  
 6.75 70 140 -6.30564  
 6.50 70 140 -8.63824  
 6.25 70 140 -11.71428  
 6.00 70 140 -15.64024  
 5.75 70 140 -20.38146  
 5.50 70 140 -25.52206  
 5.25 70 140 -29.75166  
 5.00 70 140 -29.83715  
 4.75 70 140 -18.70698  
 4.50 70 140 17.82854  
 4.25 70 140 106.17441  
 4.00 70 140 292.14011  
 3.75 70 140 650.62164  
 3.50 70 140 1300.24038  
 3.25 70 140 2432.21426  
 3.00 70 140 4376.07982  
 2.75 70 140 7265.12160  
 2.50 70 140 8889.22386  
 2.25 70 140 9495.88307  
 100.00 70 150 -0.00000  
 50.00 70 150 -0.00000  
 40.00 70 150 -0.00001  
 30.00 70 150 -0.00007  
 25.00 70 150 -0.00024  
 20.00 70 150 -0.00107  
 18.00 70 150 -0.00221  
 16.00 70 150 -0.00504  
 14.00 70 150 -0.01325  
 13.00 70 150 -0.02308  
 12.00 70 150 -0.04295  
 11.00 70 150 -0.08786  
 10.50 70 150 -0.13217  
 10.00 70 150 -0.20793  
 9.75 70 150 -0.26587  
 9.50 70 150 -0.34468  
 9.25 70 150 -0.45313  
 9.00 70 150 -0.60382  
 8.75 70 150 -0.81482  
 8.50 70 150 -1.11172  
 8.25 70 150 -1.53032  
 8.00 70 150 -2.11995  
 7.75 70 150 -2.94704  
 7.50 70 150 -4.09851  
 7.25 70 150 -5.68312  
 7.00 70 150 -7.82698  
 6.75 70 150 -10.65365  
 6.50 70 150 -14.22644  
 6.25 70 150 -18.40033

6.00 70 150 -22.46505  
5.75 70 150 -24.32463  
5.50 70 150 -18.70412  
5.25 70 150 6.53541  
5.00 70 150 77.37902  
4.75 70 150 245.46162  
4.50 70 150 604.77375  
4.25 70 150 1308.47345  
4.00 70 150 2572.76298  
3.75 70 150 4653.24943  
3.50 70 150 7303.10293  
3.25 70 150 8703.13524  
3.00 70 150 9291.01051  
2.75 70 150 9591.01405  
2.50 70 150 9762.08072  
2.25 70 150 9857.93714  
100.00 70 160 -0.00000  
50.00 70 160 -0.00000  
40.00 70 160 -0.00001  
30.00 70 160 -0.00009  
25.00 70 160 -0.00028  
20.00 70 160 -0.00125  
18.00 70 160 -0.00260  
16.00 70 160 -0.00599  
14.00 70 160 -0.01601  
13.00 70 160 -0.02826  
12.00 70 160 -0.05362  
11.00 70 160 -0.11333  
10.50 70 160 -0.17477  
10.00 70 160 -0.28379  
9.75 70 160 -0.36950  
9.50 70 160 -0.48821  
9.25 70 160 -0.65431  
9.00 70 160 -0.88850  
8.75 70 160 -1.22022  
8.50 70 160 -1.69085  
8.25 70 160 -2.35737  
8.00 70 160 -3.29626  
7.75 70 160 -4.60642  
7.50 70 160 -6.40799  
7.25 70 160 -8.82957  
7.00 70 160 -11.96480  
6.75 70 160 -15.75065  
6.50 70 160 -19.64902  
6.25 70 160 -21.84564  
6.00 70 160 -17.30078  
5.75 70 160 6.81378  
5.50 70 160 81.27447  
5.25 70 160 275.90957  
5.00 70 160 739.05908  
4.75 70 160 1758.89495  
4.50 70 160 3824.01379  
4.25 70 160 7172.80115  
4.00 70 160 8866.57404  
3.75 70 160 9397.97280  
3.50 70 160 9642.51984  
3.25 70 160 9780.25369  
3.00 70 160 9862.03624  
2.75 70 160 9912.23831  
2.50 70 160 9943.70941  
2.25 70 160 9963.70436  
100.00 70 170 -0.00000  
50.00 70 170 -0.00000  
40.00 70 170 -0.00001  
30.00 70 170 -0.00009  
25.00 70 170 -0.00031  
20.00 70 170 -0.00138  
18.00 70 170 -0.00288  
16.00 70 170 -0.00669  
14.00 70 170 -0.01809  
13.00 70 170 -0.03223  
12.00 70 170 -0.06204  
11.00 70 170 -0.13443  
10.50 70 170 -0.21122  
10.00 70 170 -0.35097  
9.75 70 170 -0.46277  
9.50 70 170 -0.61936  
9.25 70 170 -0.84061  
9.00 70 170 -1.15501  
8.75 70 170 -1.60291  
8.50 70 170 -2.24042  
8.25 70 170 -3.14363  
8.00 70 170 -4.41194  
7.75 70 170 -6.16749  
7.50 70 170 -8.54248  
7.25 70 170 -11.63353  
7.00 70 170 -15.36828  
6.75 70 170 -19.14159  
6.50 70 170 -20.85561  
6.25 70 170 -14.44943  
6.00 70 170 16.28325  
5.75 70 170 112.61886  
5.50 70 170 375.14263  
5.25 70 170 1036.24401  
5.00 70 170 2592.27365  
4.75 70 170 5938.36667  
4.50 70 170 8710.48257  
4.25 70 170 9434.63180  
4.00 70 170 9713.22865  
3.75 70 170 9847.10438  
3.50 70 170 9916.31975  
3.25 70 170 9953.54973  
3.00 70 170 9974.01455

2.75 70 170 9985.40006  
2.50 70 170 9991.77711  
2.25 70 170 9995.36244  
100.00 70 180 -0.00000  
50.00 70 180 -0.00000  
40.00 70 180 -0.00002  
30.00 70 180 -0.00010  
25.00 70 180 -0.00032  
20.00 70 180 -0.00143  
18.00 70 180 -0.00298  
16.00 70 180 -0.00694  
14.00 70 180 -0.01887  
13.00 70 180 -0.03373  
12.00 70 180 -0.06528  
11.00 70 180 -0.14278  
10.50 70 180 -0.22589  
10.00 70 180 -0.37850  
9.75 70 180 -0.50131  
9.50 70 180 -0.67397  
9.25 70 180 -0.91867  
9.00 70 180 -1.26723  
8.75 70 180 -1.76460  
8.50 70 180 -2.47301  
8.25 70 180 -3.47627  
8.00 70 180 -4.88244  
7.75 70 180 -6.82073  
7.50 70 180 -9.42105  
7.25 70 180 -12.74621  
7.00 70 180 -16.59703  
6.75 70 180 -19.97982  
6.50 70 180 -19.68929  
6.25 70 180 -6.61997  
6.00 70 180 43.58607  
5.75 70 180 193.43309  
5.50 70 180 596.76760  
5.25 70 180 1611.87193  
5.00 70 180 4000.39471  
4.75 70 180 7900.61029  
4.50 70 180 9253.37450  
4.25 70 180 9651.45982  
4.00 70 180 9825.25986  
3.75 70 180 9909.24976  
3.50 70 180 9952.01248  
3.25 70 180 9974.38445  
3.00 70 180 9986.25794  
2.75 70 180 9992.60801  
2.50 70 180 9996.01806  
2.25 70 180 9997.85334  
100.00 80 0 -0.00000  
50.00 80 0 -0.00000  
40.00 80 0 -0.00001  
30.00 80 0 -0.00006  
25.00 80 0 -0.00019  
20.00 80 0 -0.00080  
18.00 80 0 -0.00163  
16.00 80 0 -0.00374  
14.00 80 0 -0.01036  
13.00 80 0 -0.01937  
12.00 80 0 -0.04112  
11.00 80 0 -0.10290  
10.50 80 0 -0.17313  
10.00 80 0 -0.30114  
9.75 80 0 -0.40096  
9.50 80 0 -0.53638  
9.25 80 0 -0.72011  
9.00 80 0 -0.96931  
8.75 80 0 -1.30728  
8.50 80 0 -1.76604  
8.25 80 0 -2.39025  
8.00 80 0 -3.24338  
7.75 80 0 -4.41703  
7.50 80 0 -6.04342  
7.25 80 0 -8.30692  
7.00 80 0 -11.43608  
6.75 80 0 -15.61641  
6.50 80 0 -20.65429  
6.25 80 0 -24.94782  
6.00 80 0 -22.66597  
5.75 80 0 3.45008  
5.50 80 0 99.48087  
5.25 80 0 380.41160  
5.00 80 0 1118.53187  
4.75 80 0 2931.14102  
4.50 80 0 6911.09834  
4.25 80 0 9182.15976  
4.00 80 0 9719.58977  
3.75 80 0 9891.57014  
3.50 80 0 9956.13496  
3.25 80 0 9981.93370  
3.00 80 0 9992.50458  
2.75 80 0 9996.88086  
2.50 80 0 9998.70037  
2.25 80 0 9999.45821  
100.00 80 10 -0.00000  
50.00 80 10 -0.00000  
40.00 80 10 -0.00001  
30.00 80 10 -0.00006  
25.00 80 10 -0.00018  
20.00 80 10 -0.00078  
18.00 80 10 -0.00159  
16.00 80 10 -0.00366  
14.00 80 10 -0.01008  
13.00 80 10 -0.01879

12.00 80 10 -0.03973  
 11.00 80 10 -0.09895  
 10.50 80 10 -0.16612  
 10.00 80 10 -0.28833  
 9.75 80 10 -0.38348  
 9.50 80 10 -0.51240  
 9.25 80 10 -0.68701  
 9.00 80 10 -0.92330  
 8.75 80 10 -1.24281  
 8.50 80 10 -1.67476  
 8.25 80 10 -2.25935  
 8.00 80 10 -3.05290  
 7.75 80 10 -4.13573  
 7.50 80 10 -5.62315  
 7.25 80 10 -7.67776  
 7.00 80 10 -10.51143  
 6.75 80 10 -14.33895  
 6.50 80 10 -19.17369  
 6.25 80 10 -24.17903  
 6.00 80 10 -25.87965  
 5.75 80 10 -13.63739  
 5.50 80 10 41.04996  
 5.25 80 10 208.36004  
 5.00 80 10 649.84393  
 4.75 80 10 1714.66267  
 4.50 80 10 4109.12473  
 4.25 80 10 7924.12988  
 4.00 80 10 9309.67833  
 3.75 80 10 9718.35539  
 3.50 80 10 9874.88477  
 3.25 80 10 9942.32796  
 3.00 80 10 9972.96718  
 2.75 80 10 9987.22990  
 2.50 80 10 9993.94539  
 2.25 80 10 9997.12440  
 100.00 80 20 -0.00000  
 50.00 80 20 -0.00000  
 40.00 80 20 -0.00001  
 30.00 80 20 -0.00006  
 25.00 80 20 -0.00017  
 20.00 80 20 -0.00073  
 18.00 80 20 -0.00149  
 16.00 80 20 -0.00341  
 14.00 80 20 -0.00932  
 13.00 80 20 -0.01722  
 12.00 80 20 -0.03600  
 11.00 80 20 -0.08851  
 10.50 80 20 -0.14766  
 10.00 80 20 -0.25483  
 9.75 80 20 -0.33799  
 9.50 80 20 -0.45036  
 9.25 80 20 -0.60202  
 9.00 80 20 -0.80630  
 8.75 80 20 -1.08080  
 8.50 80 20 -1.44876  
 8.25 80 20 -1.94101  
 8.00 80 20 -2.59911  
 7.75 80 20 -3.47994  
 7.50 80 20 -4.66295  
 7.25 80 20 -6.26008  
 7.00 80 20 -8.42626  
 6.75 80 20 -11.36019  
 6.50 80 20 -15.26235  
 6.25 80 20 -20.16189  
 6.00 80 20 -25.39860  
 5.75 80 20 -28.28388  
 5.50 80 20 -20.96265  
 5.25 80 20 16.35902  
 5.00 80 20 128.88123  
 4.75 80 20 411.63241  
 4.50 80 20 1048.97350  
 4.25 80 20 2369.53558  
 4.00 80 20 4909.23338  
 3.75 80 20 8032.94169  
 3.50 80 20 9193.99051  
 3.25 80 20 9607.73634  
 3.00 80 20 9796.10079  
 2.75 80 20 9890.14382  
 2.50 80 20 9939.67583  
 2.25 80 20 9966.53100  
 100.00 80 30 -0.00000  
 50.00 80 30 -0.00000  
 40.00 80 30 -0.00001  
 30.00 80 30 -0.00005  
 25.00 80 30 -0.00016  
 20.00 80 30 -0.00066  
 18.00 80 30 -0.00134  
 16.00 80 30 -0.00306  
 14.00 80 30 -0.00825  
 13.00 80 30 -0.01508  
 12.00 80 30 -0.03100  
 11.00 80 30 -0.07471  
 10.50 80 30 -0.12350  
 10.00 80 30 -0.21143  
 9.75 80 30 -0.27945  
 9.50 80 30 -0.37116  
 9.25 80 30 -0.49460  
 9.00 80 30 -0.66034  
 8.75 80 30 -0.88205  
 8.50 80 30 -1.17734  
 8.25 80 30 -1.56881  
 8.00 80 30 -2.08547  
 7.75 80 30 -2.76490

7.50 80 30 -3.65664  
7.25 80 30 -4.82745  
7.00 80 30 -6.36911  
6.75 80 30 -8.40799  
6.50 80 30 -11.11116  
6.25 80 30 -14.67174  
6.00 80 30 -19.22648  
5.75 80 30 -24.59523  
5.50 80 30 -29.60492  
5.25 80 30 -30.52745  
5.00 80 30 -17.77165  
4.75 80 30 30.61818  
4.50 80 30 160.88303  
4.25 80 30 463.99949  
4.00 80 30 1108.52255  
3.75 80 30 2389.49566  
3.50 80 30 4792.73163  
3.25 80 30 7882.12349  
3.00 80 30 9116.75094  
2.75 80 30 9548.44651  
2.50 80 30 9746.28056  
2.25 80 30 9852.65324  
100.00 80 40 -0.00000  
50.00 80 40 -0.00000  
40.00 80 40 -0.00001  
30.00 80 40 -0.00004  
25.00 80 40 -0.00014  
20.00 80 40 -0.00058  
18.00 80 40 -0.00118  
16.00 80 40 -0.00266  
14.00 80 40 -0.00711  
13.00 80 40 -0.01282  
12.00 80 40 -0.02583  
11.00 80 40 -0.06070  
10.50 80 40 -0.09913  
10.00 80 40 -0.16801  
9.75 80 40 -0.22116  
9.50 80 40 -0.29274  
9.25 80 40 -0.38903  
9.00 80 40 -0.51823  
8.75 80 40 -0.69095  
8.50 80 40 -0.92070  
8.25 80 40 -1.22454  
8.00 80 40 -1.62381  
7.75 80 40 -2.14509  
7.50 80 40 -2.82160  
7.25 80 40 -3.69548  
7.00 80 40 -4.82153  
6.75 80 40 -6.27332  
6.50 80 40 -8.15180  
6.25 80 40 -10.59460  
6.00 80 40 -13.77765  
5.75 80 40 -17.88424  
5.50 80 40 -22.98118  
5.25 80 40 -28.66910  
5.00 80 40 -33.23823  
4.75 80 40 -31.82557  
4.50 80 40 -12.70057  
4.25 80 40 49.69116  
4.00 80 40 206.75751  
3.75 80 40 554.51125  
3.50 80 40 1258.25059  
3.25 80 40 2574.55112  
3.00 80 40 4845.83715  
2.75 80 40 7616.89825  
2.50 80 40 8861.93630  
2.25 80 40 9338.32954  
100.00 80 50 -0.00000  
50.00 80 50 -0.00000  
40.00 80 50 -0.00001  
30.00 80 50 -0.00004  
25.00 80 50 -0.00012  
20.00 80 50 -0.00050  
18.00 80 50 -0.00101  
16.00 80 50 -0.00229  
14.00 80 50 -0.00605  
13.00 80 50 -0.01077  
12.00 80 50 -0.02124  
11.00 80 50 -0.04847  
10.50 80 50 -0.07797  
10.00 80 50 -0.13045  
9.75 80 50 -0.17081  
9.50 80 50 -0.22513  
9.25 80 50 -0.29821  
9.00 80 50 -0.39638  
8.75 80 50 -0.52784  
8.50 80 50 -0.70313  
8.25 80 50 -0.93556  
8.00 80 50 -1.24178  
7.75 80 50 -1.64234  
7.50 80 50 -2.16243  
7.25 80 50 -2.83297  
7.00 80 50 -3.69238  
6.75 80 50 -4.78974  
6.50 80 50 -6.19014  
6.25 80 50 -7.98314  
6.00 80 50 -10.29414  
5.75 80 50 -13.29459  
5.50 80 50 -17.19733  
5.25 80 50 -22.20116  
5.00 80 50 -28.30418  
4.75 80 50 -34.82263  
4.50 80 50 -39.31365

4.25 80 50 -35.39766  
 4.00 80 50 -8.74456  
 3.75 80 50 69.61465  
 3.50 80 50 253.05960  
 3.25 80 50 630.97692  
 3.00 80 50 1337.59982  
 2.75 80 50 2551.26055  
 2.50 80 50 4489.61298  
 2.25 80 50 7099.58127  
 100.00 80 60 -0.00000  
 50.00 80 60 -0.00000  
 40.00 80 60 -0.00001  
 30.00 80 60 -0.00003  
 25.00 80 60 -0.00010  
 20.00 80 60 -0.00043  
 18.00 80 60 -0.00087  
 16.00 80 60 -0.00197  
 14.00 80 60 -0.00517  
 13.00 80 60 -0.00912  
 12.00 80 60 -0.01761  
 11.00 80 60 -0.03888  
 10.50 80 60 -0.06142  
 10.00 80 60 -0.10103  
 9.75 80 60 -0.13133  
 9.50 80 60 -0.17203  
 9.25 80 60 -0.22675  
 9.00 80 60 -0.30032  
 8.75 80 60 -0.39904  
 8.50 80 60 -0.53113  
 8.25 80 60 -0.70708  
 8.00 80 60 -0.94016  
 7.75 80 60 -1.24696  
 7.50 80 60 -1.64792  
 7.25 80 60 -2.16813  
 7.00 80 60 -2.83839  
 6.75 80 60 -3.69696  
 6.50 80 60 -4.79275  
 6.25 80 60 -6.19084  
 6.00 80 60 -7.98148  
 5.75 80 60 -10.29359  
 5.50 80 60 -13.31105  
 5.25 80 60 -17.28483  
 5.00 80 60 -22.51930  
 4.75 80 60 -29.28332  
 4.50 80 60 -37.54517  
 4.25 80 60 -46.34585  
 4.00 80 60 -52.50497  
 3.75 80 60 -48.21186  
 3.50 80 60 -16.93885  
 3.25 80 60 72.93996  
 3.00 80 60 277.70306  
 2.75 80 60 693.98300  
 2.50 80 60 1493.15168  
 2.25 80 60 3017.40790  
 100.00 80 70 -0.00000  
 50.00 80 70 -0.00000  
 40.00 80 70 -0.00000  
 30.00 80 70 -0.00003  
 25.00 80 70 -0.00008  
 20.00 80 70 -0.00037  
 18.00 80 70 -0.00076  
 16.00 80 70 -0.00173  
 14.00 80 70 -0.00454  
 13.00 80 70 -0.00793  
 12.00 80 70 -0.01502  
 11.00 80 70 -0.03205  
 10.50 80 70 -0.04957  
 10.00 80 70 -0.07984  
 9.75 80 70 -0.10278  
 9.50 80 70 -0.13346  
 9.25 80 70 -0.17459  
 9.00 80 70 -0.22984  
 8.75 80 70 -0.30403  
 8.50 80 70 -0.40353  
 8.25 80 70 -0.53661  
 8.00 80 70 -0.71390  
 7.75 80 70 -0.94894  
 7.50 80 70 -1.25870  
 7.25 80 70 -1.66438  
 7.00 80 70 -2.19222  
 6.75 80 70 -2.87491  
 6.50 80 70 -3.75365  
 6.25 80 70 -4.88182  
 6.00 80 70 -6.33120  
 5.75 80 70 -8.20214  
 5.50 80 70 -10.63921  
 5.25 80 70 -13.85243  
 5.00 80 70 -18.14019  
 4.75 80 70 -23.90019  
 4.50 80 70 -31.59363  
 4.25 80 70 -41.58700  
 4.00 80 70 -53.72115  
 3.75 80 70 -66.32360  
 3.50 80 70 -74.12950  
 3.25 80 70 -64.05414  
 3.00 80 70 -6.49707  
 2.75 80 70 163.46928  
 2.50 80 70 589.36075  
 2.25 80 70 1595.70985  
 100.00 80 80 -0.00000  
 50.00 80 80 -0.00000  
 40.00 80 80 -0.00000  
 30.00 80 80 -0.00002

25.00 80 80 -0.00008  
 20.00 80 80 -0.00034  
 18.00 80 80 -0.00070  
 16.00 80 80 -0.00159  
 14.00 80 80 -0.00417  
 13.00 80 80 -0.00722  
 12.00 80 80 -0.01345  
 11.00 80 80 -0.02777  
 10.50 80 80 -0.04200  
 10.00 80 80 -0.06602  
 9.75 80 80 -0.08398  
 9.50 80 80 -0.10781  
 9.25 80 80 -0.13958  
 9.00 80 80 -0.18208  
 8.75 80 80 -0.23906  
 8.50 80 80 -0.31548  
 8.25 80 80 -0.41791  
 8.00 80 80 -0.55497  
 7.75 80 80 -0.73779  
 7.50 80 80 -0.98071  
 7.25 80 80 -1.30200  
 7.00 80 80 -1.72483  
 6.75 80 80 -2.27856  
 6.50 80 80 -3.00057  
 6.25 80 80 -3.93913  
 6.00 80 80 -5.15809  
 5.75 80 80 -6.74434  
 5.50 80 80 -8.81987  
 5.25 80 80 -11.55965  
 5.00 80 80 -15.21583  
 4.75 80 80 -20.14428  
 4.50 80 80 -26.81835  
 4.25 80 80 -35.78772  
 4.00 80 80 -47.48028  
 3.75 80 80 -61.61079  
 3.50 80 80 -75.65947  
 3.25 80 80 -81.19419  
 3.00 80 80 -55.20159  
 2.75 80 80 60.14642  
 2.50 80 80 404.18494  
 2.25 80 80 1302.32466  
 100.00 80 90 -0.00000  
 50.00 80 90 -0.00000  
 40.00 80 90 -0.00000  
 30.00 80 90 -0.00002  
 25.00 80 90 -0.00007  
 20.00 80 90 -0.00033  
 18.00 80 90 -0.00069  
 16.00 80 90 -0.00157  
 14.00 80 90 -0.00409  
 13.00 80 90 -0.00704  
 12.00 80 90 -0.01289  
 11.00 80 90 -0.02584  
 10.50 80 90 -0.03824  
 10.00 80 90 -0.05862  
 9.75 80 90 -0.07360  
 9.50 80 90 -0.09327  
 9.25 80 90 -0.11925  
 9.00 80 90 -0.15377  
 8.75 80 90 -0.19981  
 8.50 80 90 -0.26140  
 8.25 80 90 -0.34395  
 8.00 80 90 -0.45463  
 7.75 80 90 -0.60297  
 7.50 80 90 -0.80147  
 7.25 80 90 -1.06654  
 7.00 80 90 -1.41952  
 6.75 80 90 -1.88823  
 6.50 80 90 -2.50892  
 6.25 80 90 -3.32917  
 6.00 80 90 -4.41211  
 5.75 80 90 -5.84284  
 5.50 80 90 -7.73808  
 5.25 80 90 -10.26022  
 5.00 80 90 -13.63627  
 4.75 80 90 -18.17918  
 4.50 80 90 -24.30000  
 4.25 80 90 -32.47533  
 4.00 80 90 -43.07484  
 3.75 80 90 -55.80805  
 3.50 80 90 -68.20396  
 3.25 80 90 -71.72414  
 3.00 80 90 -42.24113  
 2.75 80 90 82.53480  
 2.50 80 90 454.69547  
 2.25 80 90 1428.28670  
 100.00 80 100 -0.00000  
 50.00 80 100 -0.00000  
 40.00 80 100 -0.00000  
 30.00 80 100 -0.00002  
 25.00 80 100 -0.00008  
 20.00 80 100 -0.00036  
 18.00 80 100 -0.00075  
 16.00 80 100 -0.00169  
 14.00 80 100 -0.00435  
 13.00 80 100 -0.00744  
 12.00 80 100 -0.01344  
 11.00 80 100 -0.02628  
 10.50 80 100 -0.03819  
 10.00 80 100 -0.05726  
 9.75 80 100 -0.07102  
 9.50 80 100 -0.08887  
 9.25 80 100 -0.11221

9.00 80 100 -0.14294  
 8.75 80 100 -0.18367  
 8.50 80 100 -0.23792  
 8.25 80 100 -0.31048  
 8.00 80 100 -0.40788  
 7.75 80 100 -0.53892  
 7.50 80 100 -0.71546  
 7.25 80 100 -0.95348  
 7.00 80 100 -1.27442  
 6.75 80 100 -1.70704  
 6.50 80 100 -2.28983  
 6.25 80 100 -3.07450  
 6.00 80 100 -4.13053  
 5.75 80 100 -5.55171  
 5.50 80 100 -7.46486  
 5.25 80 100 -10.04146  
 5.00 80 100 -13.51136  
 4.75 80 100 -18.17465  
 4.50 80 100 -24.39823  
 4.25 80 100 -32.55719  
 4.00 80 100 -42.81503  
 3.75 80 100 -54.46839  
 3.50 80 100 -64.17136  
 3.25 80 100 -61.37375  
 3.00 80 100 -17.04784  
 2.75 80 100 143.17382  
 2.50 80 100 600.29311  
 2.25 80 100 1773.44833  
 100.00 80 110 -0.00000  
 50.00 80 110 -0.00000  
 40.00 80 110 -0.00000  
 30.00 80 110 -0.00003  
 25.00 80 110 -0.00010  
 20.00 80 110 -0.00043  
 18.00 80 110 -0.00088  
 16.00 80 110 -0.00198  
 14.00 80 110 -0.00504  
 13.00 80 110 -0.00856  
 12.00 80 110 -0.01533  
 11.00 80 110 -0.02948  
 10.50 80 110 -0.04232  
 10.00 80 110 -0.06251  
 9.75 80 110 -0.07687  
 9.50 80 110 -0.09534  
 9.25 80 110 -0.11932  
 9.00 80 110 -0.15069  
 8.75 80 110 -0.19208  
 8.50 80 110 -0.24709  
 8.25 80 110 -0.32071  
 8.00 80 110 -0.41984  
 7.75 80 110 -0.55400  
 7.50 80 110 -0.73632  
 7.25 80 110 -0.98493  
 7.00 80 110 -1.32473  
 6.75 80 110 -1.78986  
 6.50 80 110 -2.42698  
 6.25 80 110 -3.29951  
 6.00 80 110 -4.49323  
 5.75 80 110 -6.12323  
 5.50 80 110 -8.34234  
 5.25 80 110 -11.35001  
 5.00 80 110 -15.39900  
 4.75 80 110 -20.79194  
 4.50 80 110 -27.84666  
 4.25 80 110 -36.77629  
 4.00 80 110 -47.34631  
 3.75 80 110 -57.96024  
 3.50 80 110 -63.30614  
 3.25 80 110 -48.43726  
 3.00 80 110 25.78436  
 2.75 80 110 257.50108  
 2.50 80 110 883.91914  
 2.25 80 110 2454.69752  
 100.00 80 120 -0.00000  
 50.00 80 120 -0.00000  
 40.00 80 120 -0.00001  
 30.00 80 120 -0.00004  
 25.00 80 120 -0.00012  
 20.00 80 120 -0.00054  
 18.00 80 120 -0.00110  
 16.00 80 120 -0.00246  
 14.00 80 120 -0.00625  
 13.00 80 120 -0.01059  
 12.00 80 120 -0.01892  
 11.00 80 120 -0.03624  
 10.50 80 120 -0.05187  
 10.00 80 120 -0.07633  
 9.75 80 120 -0.09371  
 9.50 80 120 -0.11606  
 9.25 80 120 -0.14509  
 9.00 80 120 -0.18319  
 8.75 80 120 -0.23367  
 8.50 80 120 -0.30120  
 8.25 80 120 -0.39232  
 8.00 80 120 -0.51621  
 7.75 80 120 -0.68576  
 7.50 80 120 -0.91900  
 7.25 80 120 -1.24105  
 7.00 80 120 -1.68671  
 6.75 80 120 -2.30384  
 6.50 80 120 -3.15762  
 6.25 80 120 -4.33582  
 6.00 80 120 -5.95492

5.75 80 120 -8.16639  
5.50 80 120 -11.16141  
5.25 80 120 -15.16974  
5.00 80 120 -20.44277  
4.75 80 120 -27.19889  
4.50 80 120 -35.48326  
4.25 80 120 -44.83719  
4.00 80 120 -53.54404  
3.75 80 120 -56.92115  
3.50 80 120 -43.41835  
3.25 80 120 14.42209  
3.00 80 120 181.16601  
2.75 80 120 608.34059  
2.50 80 120 1650.17207  
2.25 80 120 4122.64392  
100.00 80 130 -0.00000  
50.00 80 130 -0.00000  
40.00 80 130 -0.00001  
30.00 80 130 -0.00005  
25.00 80 130 -0.00016  
20.00 80 130 -0.00069  
18.00 80 130 -0.00141  
16.00 80 130 -0.00316  
14.00 80 130 -0.00806  
13.00 80 130 -0.01371  
12.00 80 130 -0.02466  
11.00 80 130 -0.04772  
10.50 80 130 -0.06882  
10.00 80 130 -0.10234  
9.75 80 130 -0.12650  
9.50 80 130 -0.15794  
9.25 80 130 -0.19934  
9.00 80 130 -0.25448  
8.75 80 130 -0.32871  
8.50 80 130 -0.42963  
8.25 80 130 -0.56802  
8.00 80 130 -0.75910  
7.75 80 130 -1.02422  
7.50 80 130 -1.39318  
7.25 80 130 -1.90702  
7.00 80 130 -2.62169  
6.75 80 130 -3.61221  
6.50 80 130 -4.97728  
6.25 80 130 -6.84336  
6.00 80 130 -9.36619  
5.75 80 130 -12.72505  
5.50 80 130 -17.09908  
5.25 80 130 -22.60345  
5.00 80 130 -29.14054  
4.75 80 130 -36.08054  
4.50 80 130 -41.61559  
4.25 80 130 -41.51245  
4.00 80 130 -26.77647  
3.75 80 130 20.68977  
3.50 80 130 136.33197  
3.25 80 130 389.37631  
3.00 80 130 917.52771  
2.75 80 130 2004.08746  
2.50 80 130 4256.17072  
2.25 80 130 7870.18352  
100.00 80 140 -0.00000  
50.00 80 140 -0.00000  
40.00 80 140 -0.00001  
30.00 80 140 -0.00006  
25.00 80 140 -0.00020  
20.00 80 140 -0.00088  
18.00 80 140 -0.00180  
16.00 80 140 -0.00405  
14.00 80 140 -0.01046  
13.00 80 140 -0.01798  
12.00 80 140 -0.03281  
11.00 80 140 -0.06498  
10.50 80 140 -0.09537  
10.00 80 140 -0.14525  
9.75 80 140 -0.18220  
9.50 80 140 -0.23131  
9.25 80 140 -0.29741  
9.00 80 140 -0.38738  
8.75 80 140 -0.51110  
8.50 80 140 -0.68259  
8.25 80 140 -0.92173  
8.00 80 140 -1.25637  
7.75 80 140 -1.72505  
7.50 80 140 -2.38033  
7.25 80 140 -3.29238  
7.00 80 140 -4.55251  
6.75 80 140 -6.27516  
6.50 80 140 -8.59520  
6.25 80 140 -11.65344  
6.00 80 140 -15.55406  
5.75 80 140 -20.25912  
5.50 80 140 -25.34805  
5.25 80 140 -29.50370  
5.00 80 140 -29.48324  
4.75 80 140 -18.20097  
4.50 80 140 18.55445  
4.25 80 140 107.22353  
4.00 80 140 293.67907  
3.75 80 140 652.93194  
3.50 80 140 1303.78004  
3.25 80 140 2437.51286  
3.00 80 140 4382.56876  
2.75 80 140 7265.28135

2.50 80 140 8884.28953  
 2.25 80 140 9490.34947  
 100.00 80 150 -0.00000  
 50.00 80 150 -0.00000  
 40.00 80 150 -0.00001  
 30.00 80 150 -0.00007  
 25.00 80 150 -0.00024  
 20.00 80 150 -0.00108  
 18.00 80 150 -0.00221  
 16.00 80 150 -0.00505  
 14.00 80 150 -0.01327  
 13.00 80 150 -0.02310  
 12.00 80 150 -0.04299  
 11.00 80 150 -0.08788  
 10.50 80 150 -0.13216  
 10.00 80 150 -0.20783  
 9.75 80 150 -0.26571  
 9.50 80 150 -0.34443  
 9.25 80 150 -0.45273  
 9.00 80 150 -0.60322  
 8.75 80 150 -0.81393  
 8.50 80 150 -1.11041  
 8.25 80 150 -1.52842  
 8.00 80 150 -2.11720  
 7.75 80 150 -2.94309  
 7.50 80 150 -4.09282  
 7.25 80 150 -5.67493  
 7.00 80 150 -7.81518  
 6.75 80 150 -10.63663  
 6.50 80 150 -14.20179  
 6.25 80 150 -18.36443  
 6.00 80 150 -22.41239  
 5.75 80 150 -24.24660  
 5.50 80 150 -18.58690  
 5.25 80 150 6.71453  
 5.00 80 150 77.65823  
 4.75 80 150 245.90576  
 4.50 80 150 605.49188  
 4.25 80 150 1309.64252  
 4.00 80 150 2574.65224  
 3.75 80 150 4656.23028  
 3.50 80 150 7305.63360  
 3.25 80 150 8704.12689  
 3.00 80 150 9291.36142  
 2.75 80 150 9591.03205  
 2.50 80 150 9761.93707  
 2.25 80 150 9857.76672  
 100.00 80 160 -0.00000  
 50.00 80 160 -0.00000  
 40.00 80 160 -0.00001  
 30.00 80 160 -0.00009  
 25.00 80 160 -0.00028  
 20.00 80 160 -0.00126  
 18.00 80 160 -0.00260  
 16.00 80 160 -0.00600  
 14.00 80 160 -0.01603  
 13.00 80 160 -0.02828  
 12.00 80 160 -0.05364  
 11.00 80 160 -0.11335  
 10.50 80 160 -0.17479  
 10.00 80 160 -0.28379  
 9.75 80 160 -0.36948  
 9.50 80 160 -0.48816  
 9.25 80 160 -0.65421  
 9.00 80 160 -0.88832  
 8.75 80 160 -1.21995  
 8.50 80 160 -1.69042  
 8.25 80 160 -2.35671  
 8.00 80 160 -3.29527  
 7.75 80 160 -4.60495  
 7.50 80 160 -6.40580  
 7.25 80 160 -8.82630  
 7.00 80 160 -11.95990  
 6.75 80 160 -15.74324  
 6.50 80 160 -19.63762  
 6.25 80 160 -21.82766  
 6.00 80 160 -17.27139  
 5.75 80 160 6.86410  
 5.50 80 160 81.36520  
 5.25 80 160 276.08137  
 5.00 80 160 739.39569  
 4.75 80 160 1759.56043  
 4.50 80 160 3825.29769  
 4.25 80 160 7174.19693  
 4.00 80 160 8867.02835  
 3.75 80 160 9398.16668  
 3.50 80 160 9642.63684  
 3.25 80 160 9780.32829  
 3.00 80 160 9862.08539  
 2.75 80 160 9912.27132  
 2.50 80 160 9943.73183  
 2.25 80 160 9963.71967  
 100.00 80 170 -0.00000  
 50.00 80 170 -0.00000  
 40.00 80 170 -0.00001  
 30.00 80 170 -0.00009  
 25.00 80 170 -0.00031  
 20.00 80 170 -0.00138  
 18.00 80 170 -0.00288  
 16.00 80 170 -0.00669  
 14.00 80 170 -0.01809  
 13.00 80 170 -0.03223  
 12.00 80 170 -0.06205

11.00 80 170 -0.13444  
 10.50 80 170 -0.21123  
 10.00 80 170 -0.35098  
 9.75 80 170 -0.46278  
 9.50 80 170 -0.61937  
 9.25 80 170 -0.84061  
 9.00 80 170 -1.15500  
 8.75 80 170 -1.60289  
 8.50 80 170 -2.24038  
 8.25 80 170 -3.14355  
 8.00 80 170 -4.41181  
 7.75 80 170 -6.16727  
 7.50 80 170 -8.54212  
 7.25 80 170 -11.63293  
 7.00 80 170 -15.36726  
 6.75 80 170 -19.13977  
 6.50 80 170 -20.85218  
 6.25 80 170 -14.44258  
 6.00 80 170 16.29788  
 5.75 80 170 112.65177  
 5.50 80 170 375.21923  
 5.25 80 170 1036.42416  
 5.00 80 170 2592.68980  
 4.75 80 170 5939.19777  
 4.50 80 170 8710.75437  
 4.25 80 170 9434.72739  
 4.00 80 170 9713.27769  
 3.75 80 170 9847.13170  
 3.50 80 170 9916.33563  
 3.25 80 170 9953.55914  
 3.00 80 170 9974.02018  
 2.75 80 170 9985.40344  
 2.50 80 170 9991.77914  
 2.25 80 170 9995.36366  
 100.00 80 180 -0.00000  
 50.00 80 180 -0.00000  
 40.00 80 180 -0.00002  
 30.00 80 180 -0.00010  
 25.00 80 180 -0.00032  
 20.00 80 180 -0.00143  
 18.00 80 180 -0.00298  
 16.00 80 180 -0.00694  
 14.00 80 180 -0.01887  
 13.00 80 180 -0.03373  
 12.00 80 180 -0.06528  
 11.00 80 180 -0.14278  
 10.50 80 180 -0.22589  
 10.00 80 180 -0.37850  
 9.75 80 180 -0.50131  
 9.50 80 180 -0.67397  
 9.25 80 180 -0.91867  
 9.00 80 180 -1.26723  
 8.75 80 180 -1.76460  
 8.50 80 180 -2.47301  
 8.25 80 180 -3.47627  
 8.00 80 180 -4.88244  
 7.75 80 180 -6.82073  
 7.50 80 180 -9.42105  
 7.25 80 180 -12.74621  
 7.00 80 180 -16.59703  
 6.75 80 180 -19.97982  
 6.50 80 180 -19.68929  
 6.25 80 180 -6.61997  
 6.00 80 180 43.58607  
 5.75 80 180 193.43309  
 5.50 80 180 596.76760  
 5.25 80 180 1611.87193  
 5.00 80 180 4000.39471  
 4.75 80 180 7900.61029  
 4.50 80 180 9253.37450  
 4.25 80 180 9651.45982  
 4.00 80 180 9825.25986  
 3.75 80 180 9909.24976  
 3.50 80 180 9952.01248  
 3.25 80 180 9974.38445  
 3.00 80 180 9986.25794  
 2.75 80 180 9992.60801  
 2.50 80 180 9996.01806  
 2.25 80 180 9997.85334  
 100.00 90 0 -0.00000  
 50.00 90 0 -0.00000  
 40.00 90 0 -0.00001  
 30.00 90 0 -0.00006  
 25.00 90 0 -0.00019  
 20.00 90 0 -0.00080  
 18.00 90 0 -0.00163  
 16.00 90 0 -0.00374  
 14.00 90 0 -0.01036  
 13.00 90 0 -0.01937  
 12.00 90 0 -0.04112  
 11.00 90 0 -0.10290  
 10.50 90 0 -0.17313  
 10.00 90 0 -0.30114  
 9.75 90 0 -0.40096  
 9.50 90 0 -0.53638  
 9.25 90 0 -0.72011  
 9.00 90 0 -0.96931  
 8.75 90 0 -1.30728  
 8.50 90 0 -1.76604  
 8.25 90 0 -2.39025  
 8.00 90 0 -3.24338  
 7.75 90 0 -4.41703  
 7.50 90 0 -6.04342

7.25 90 0 -8.30692  
7.00 90 0 -11.43608  
6.75 90 0 -15.61641  
6.50 90 0 -20.65429  
6.25 90 0 -24.94782  
6.00 90 0 -22.66597  
5.75 90 0 3.45008  
5.50 90 0 99.48087  
5.25 90 0 380.41160  
5.00 90 0 1118.53187  
4.75 90 0 2931.14102  
4.50 90 0 6911.09834  
4.25 90 0 9182.15976  
4.00 90 0 9719.58977  
3.75 90 0 9891.57014  
3.50 90 0 9956.13496  
3.25 90 0 9981.93370  
3.00 90 0 9992.50458  
2.75 90 0 9996.88086  
2.50 90 0 9998.70037  
2.25 90 0 9999.45821  
100.00 90 10 -0.00000  
50.00 90 10 -0.00000  
40.00 90 10 -0.00001  
30.00 90 10 -0.00006  
25.00 90 10 -0.00018  
20.00 90 10 -0.00078  
18.00 90 10 -0.00159  
16.00 90 10 -0.00365  
14.00 90 10 -0.01008  
13.00 90 10 -0.01878  
12.00 90 10 -0.03970  
11.00 90 10 -0.09885  
10.50 90 10 -0.16593  
10.00 90 10 -0.28797  
9.75 90 10 -0.38299  
9.50 90 10 -0.51175  
9.25 90 10 -0.68614  
9.00 90 10 -0.92215  
8.75 90 10 -1.24129  
8.50 90 10 -1.67277  
8.25 90 10 -2.25677  
8.00 90 10 -3.04960  
7.75 90 10 -4.13149  
7.50 90 10 -5.61771  
7.25 90 10 -7.67068  
7.00 90 10 -10.50193  
6.75 90 10 -14.32551  
6.50 90 10 -19.15312  
6.25 90 10 -24.14439  
6.00 90 10 -25.81560  
5.75 90 10 -13.50984  
5.50 90 10 41.31643  
5.25 90 10 208.92910  
5.00 90 10 651.05878  
4.75 90 10 1717.20306  
4.50 90 10 4114.21650  
4.25 90 10 7927.63520  
4.00 90 10 9310.44452  
3.75 90 10 9718.57191  
3.50 90 10 9874.95185  
3.25 90 10 9942.34768  
3.00 90 10 9972.97156  
2.75 90 10 9987.22973  
2.50 90 10 9993.94426  
2.25 90 10 9997.12336  
100.00 90 20 -0.00000  
50.00 90 20 -0.00000  
40.00 90 20 -0.00001  
30.00 90 20 -0.00006  
25.00 90 20 -0.00017  
20.00 90 20 -0.00073  
18.00 90 20 -0.00149  
16.00 90 20 -0.00340  
14.00 90 20 -0.00930  
13.00 90 20 -0.01718  
12.00 90 20 -0.03589  
11.00 90 20 -0.08814  
10.50 90 20 -0.14699  
10.00 90 20 -0.25360  
9.75 90 20 -0.33633  
9.50 90 20 -0.44813  
9.25 90 20 -0.59903  
9.00 90 20 -0.80233  
8.75 90 20 -1.07557  
8.50 90 20 -1.44190  
8.25 90 20 -1.93212  
8.00 90 20 -2.58765  
7.75 90 20 -3.46525  
7.50 90 20 -4.64414  
7.25 90 20 -6.23583  
7.00 90 20 -8.39443  
6.75 90 20 -11.31701  
6.50 90 20 -15.20070  
6.25 90 20 -20.06788  
6.00 90 20 -25.24451  
5.75 90 20 -28.01385  
5.50 90 20 -20.46446  
5.25 90 20 17.30668  
5.00 90 20 130.69654  
4.75 90 20 415.04188  
4.50 90 20 1055.03691  
4.25 90 20 2379.16774

4.00 90 20 4921.06243  
 3.75 90 20 8034.31580  
 3.50 90 20 9191.73597  
 3.25 90 20 9605.45859  
 3.00 90 20 9794.39021  
 2.75 90 20 9888.94260  
 2.50 90 20 9938.86070  
 2.25 90 20 9965.99089  
 100.00 90 30 -0.00000  
 50.00 90 30 -0.00000  
 40.00 90 30 -0.00001  
 30.00 90 30 -0.00005  
 25.00 90 30 -0.00016  
 20.00 90 30 -0.00066  
 18.00 90 30 -0.00134  
 16.00 90 30 -0.00305  
 14.00 90 30 -0.00822  
 13.00 90 30 -0.01500  
 12.00 90 30 -0.03080  
 11.00 90 30 -0.07407  
 10.50 90 30 -0.12233  
 10.00 90 30 -0.20928  
 9.75 90 30 -0.27655  
 9.50 90 30 -0.36725  
 9.25 90 30 -0.48936  
 9.00 90 30 -0.65336  
 8.75 90 30 -0.87283  
 8.50 90 30 -1.16525  
 8.25 90 30 -1.55308  
 8.00 90 30 -2.06519  
 7.75 90 30 -2.73893  
 7.50 90 30 -3.62353  
 7.25 90 30 -4.78525  
 7.00 90 30 -6.31496  
 6.75 90 30 -8.33731  
 6.50 90 30 -11.01632  
 6.25 90 30 -14.53946  
 6.00 90 30 -19.03350  
 5.75 90 30 -24.30096  
 5.50 90 30 -29.13982  
 5.25 90 30 -29.77730  
 5.00 90 30 -16.56498  
 4.75 90 30 32.48510  
 4.50 90 30 163.47097  
 4.25 90 30 466.58937  
 4.00 90 30 1107.79258  
 3.75 90 30 2375.15740  
 3.50 90 30 4738.97392  
 3.25 90 30 7824.90881  
 3.00 90 30 9091.44180  
 2.75 90 30 9535.92789  
 2.50 90 30 9739.54249  
 2.25 90 30 9848.79270  
 100.00 90 40 -0.00000  
 50.00 90 40 -0.00000  
 40.00 90 40 -0.00001  
 30.00 90 40 -0.00004  
 25.00 90 40 -0.00014  
 20.00 90 40 -0.00058  
 18.00 90 40 -0.00117  
 16.00 90 40 -0.00265  
 14.00 90 40 -0.00706  
 13.00 90 40 -0.01271  
 12.00 90 40 -0.02556  
 11.00 90 40 -0.05988  
 10.50 90 40 -0.09764  
 10.00 90 40 -0.16528  
 9.75 90 40 -0.21747  
 9.50 90 40 -0.28777  
 9.25 90 40 -0.38235  
 9.00 90 40 -0.50932  
 8.75 90 40 -0.67913  
 8.50 90 40 -0.90514  
 8.25 90 40 -1.20424  
 8.00 90 40 -1.59757  
 7.75 90 40 -2.11144  
 7.50 90 40 -2.77877  
 7.25 90 40 -3.64119  
 7.00 90 40 -4.75275  
 6.75 90 40 -6.18569  
 6.50 90 40 -8.03869  
 6.25 90 40 -10.44575  
 6.00 90 40 -13.57736  
 5.75 90 40 -17.60978  
 5.50 90 40 -22.60353  
 5.25 90 40 -28.16202  
 5.00 90 40 -32.61090  
 4.75 90 40 -31.21703  
 4.50 90 40 -12.62579  
 4.25 90 40 47.74292  
 4.00 90 40 198.96558  
 3.75 90 40 531.90284  
 3.50 90 40 1201.52789  
 3.25 90 40 2446.36163  
 3.00 90 40 4583.37943  
 2.75 90 40 7375.49819  
 2.50 90 40 8757.38530  
 2.25 90 40 9287.17241  
 100.00 90 50 -0.00000  
 50.00 90 50 -0.00000  
 40.00 90 50 -0.00001  
 30.00 90 50 -0.00004  
 25.00 90 50 -0.00012

20.00 90 50 -0.00049  
 18.00 90 50 -0.00100  
 16.00 90 50 -0.00227  
 14.00 90 50 -0.00599  
 13.00 90 50 -0.01065  
 12.00 90 50 -0.02095  
 11.00 90 50 -0.04761  
 10.50 90 50 -0.07643  
 10.00 90 50 -0.12761  
 9.75 90 50 -0.16698  
 9.50 90 50 -0.21996  
 9.25 90 50 -0.29125  
 9.00 90 50 -0.38706  
 8.75 90 50 -0.51543  
 8.50 90 50 -0.68672  
 8.25 90 50 -0.91405  
 8.00 90 50 -1.21382  
 7.75 90 50 -1.60632  
 7.50 90 50 -2.11643  
 7.25 90 50 -2.77463  
 7.00 90 50 -3.61872  
 6.75 90 50 -4.69677  
 6.50 90 50 -6.07223  
 6.25 90 50 -7.83207  
 6.00 90 50 -10.09807  
 5.75 90 50 -13.03760  
 5.50 90 50 -16.86181  
 5.25 90 50 -21.77846  
 5.00 90 50 -27.82604  
 4.75 90 50 -34.44110  
 4.50 90 50 -39.48768  
 4.25 90 50 -37.30417  
 4.00 90 50 -15.13754  
 3.75 90 50 52.71491  
 3.50 90 50 213.30766  
 3.25 90 50 544.80629  
 3.00 90 50 1163.84995  
 2.75 90 50 2225.87791  
 2.50 90 50 3926.79563  
 2.25 90 50 6460.15611  
 100.00 90 60 -0.00000  
 50.00 90 60 -0.00000  
 40.00 90 60 -0.00001  
 30.00 90 60 -0.00003  
 25.00 90 60 -0.00010  
 20.00 90 60 -0.00042  
 18.00 90 60 -0.00086  
 16.00 90 60 -0.00195  
 14.00 90 60 -0.00512  
 13.00 90 60 -0.00900  
 12.00 90 60 -0.01733  
 11.00 90 60 -0.03809  
 10.50 90 60 -0.06001  
 10.00 90 60 -0.09846  
 9.75 90 60 -0.12787  
 9.50 90 60 -0.16734  
 9.25 90 60 -0.22043  
 9.00 90 60 -0.29182  
 8.75 90 60 -0.38769  
 8.50 90 60 -0.51604  
 8.25 90 60 -0.68717  
 8.00 90 60 -0.91412  
 7.75 90 60 -1.21317  
 7.50 90 60 -1.60448  
 7.25 90 60 -2.11274  
 7.00 90 60 -2.76821  
 6.75 90 60 -3.60837  
 6.50 90 60 -4.68091  
 6.25 90 60 -6.04892  
 6.00 90 60 -7.79974  
 5.75 90 60 -10.05846  
 5.50 90 60 -13.00566  
 5.25 90 60 -16.89388  
 5.00 90 60 -22.04590  
 4.75 90 60 -28.79392  
 4.50 90 60 -37.27595  
 4.25 90 60 -46.93718  
 4.00 90 60 -55.48974  
 3.75 90 60 -56.98124  
 3.50 90 60 -38.54741  
 3.25 90 60 24.62729  
 3.00 90 60 176.99616  
 2.75 90 60 496.24454  
 2.50 90 60 1125.93795  
 2.25 90 60 2370.45864  
 100.00 90 70 -0.00000  
 50.00 90 70 -0.00000  
 40.00 90 70 -0.00000  
 30.00 90 70 -0.00003  
 25.00 90 70 -0.00008  
 20.00 90 70 -0.00037  
 18.00 90 70 -0.00075  
 16.00 90 70 -0.00172  
 14.00 90 70 -0.00449  
 13.00 90 70 -0.00783  
 12.00 90 70 -0.01478  
 11.00 90 70 -0.03139  
 10.50 90 70 -0.04841  
 10.00 90 70 -0.07773  
 9.75 90 70 -0.09993  
 9.50 90 70 -0.12961  
 9.25 90 70 -0.16939  
 9.00 90 70 -0.22283

8.75 90 70 -0.29462  
8.50 90 70 -0.39095  
8.25 90 70 -0.51991  
8.00 90 70 -0.69189  
7.75 90 70 -0.92014  
7.50 90 70 -1.22135  
7.25 90 70 -1.61631  
7.00 90 70 -2.13082  
6.75 90 70 -2.79691  
6.50 90 70 -3.65485  
6.25 90 70 -4.75652  
6.00 90 70 -6.17139  
5.75 90 70 -7.99648  
5.50 90 70 -10.37225  
5.25 90 70 -13.50556  
5.00 90 70 -17.69815  
4.75 90 70 -23.37197  
4.50 90 70 -31.06661  
4.25 90 70 -41.35331  
4.00 90 70 -54.55310  
3.75 90 70 -70.04387  
3.50 90 70 -84.74032  
3.25 90 70 -89.88094  
3.00 90 70 -64.09017  
2.75 90 70 42.51737  
2.50 90 70 346.94101  
2.25 90 70 1128.67123  
100.00 90 80 -0.00000  
50.00 90 80 -0.00000  
40.00 90 80 -0.00000  
30.00 90 80 -0.00002  
25.00 90 80 -0.00008  
20.00 90 80 -0.00034  
18.00 90 80 -0.00069  
16.00 90 80 -0.00158  
14.00 90 80 -0.00413  
13.00 90 80 -0.00714  
12.00 90 80 -0.01326  
11.00 90 80 -0.02725  
10.50 90 80 -0.04109  
10.00 90 80 -0.06439  
9.75 90 80 -0.08178  
9.50 90 80 -0.10485  
9.25 90 80 -0.13558  
9.00 90 80 -0.17668  
8.75 90 80 -0.23177  
8.50 90 80 -0.30570  
8.25 90 80 -0.40485  
8.00 90 80 -0.53760  
7.75 90 80 -0.71487  
7.50 90 80 -0.95067  
7.25 90 80 -1.26292  
7.00 90 80 -1.67435  
6.75 90 80 -2.21375  
6.50 90 80 -2.91771  
6.25 90 80 -3.83337  
6.00 90 80 -5.02279  
5.75 90 80 -6.57027  
5.50 90 80 -8.59420  
5.25 90 80 -11.26549  
5.00 90 80 -14.83426  
4.75 90 80 -19.66384  
4.50 90 80 -26.26320  
4.25 90 80 -35.28934  
4.00 90 80 -47.44401  
3.75 90 80 -63.08069  
3.50 90 80 -81.08320  
3.25 90 80 -95.97197  
3.00 90 80 -90.73893  
2.75 90 80 -19.46007  
2.50 90 80 234.07640  
2.25 90 80 951.38087  
100.00 90 90 -0.00000  
50.00 90 90 -0.00000  
40.00 90 90 -0.00000  
30.00 90 90 -0.00002  
25.00 90 90 -0.00007  
20.00 90 90 -0.00033  
18.00 90 90 -0.00069  
16.00 90 90 -0.00157  
14.00 90 90 -0.00406  
13.00 90 90 -0.00698  
12.00 90 90 -0.01275  
11.00 90 90 -0.02545  
10.50 90 90 -0.03756  
10.00 90 90 -0.05742  
9.75 90 90 -0.07198  
9.50 90 90 -0.09108  
9.25 90 90 -0.11630  
9.00 90 90 -0.14978  
8.75 90 90 -0.19442  
8.50 90 90 -0.25414  
8.25 90 90 -0.33419  
8.00 90 90 -0.44156  
7.75 90 90 -0.58556  
7.50 90 90 -0.77841  
7.25 90 90 -1.03618  
7.00 90 90 -1.37979  
6.75 90 90 -1.83653  
6.50 90 90 -2.44195  
6.25 90 90 -3.24263  
6.00 90 90 -4.30030  
5.75 90 90 -5.69803

5.50 90 90 -7.54969  
5.25 90 90 -10.01416  
5.00 90 90 -13.31556  
4.75 90 90 -17.76878  
4.50 90 90 -23.80321  
4.25 90 90 -31.95826  
4.00 90 90 -42.77485  
3.75 90 90 -56.38100  
3.50 90 90 -71.26221  
3.25 90 90 -80.97082  
3.00 90 90 -65.82065  
2.75 90 90 27.17883  
2.50 90 90 330.71535  
2.25 90 90 1158.47280  
100.00 90 100 -0.00000  
50.00 90 100 -0.00000  
40.00 90 100 -0.00000  
30.00 90 100 -0.00002  
25.00 90 100 -0.00008  
20.00 90 100 -0.00036  
18.00 90 100 -0.00075  
16.00 90 100 -0.00169  
14.00 90 100 -0.00434  
13.00 90 100 -0.00739  
12.00 90 100 -0.01334  
11.00 90 100 -0.02600  
10.50 90 100 -0.03771  
10.00 90 100 -0.05640  
9.75 90 100 -0.06986  
9.50 90 100 -0.08731  
9.25 90 100 -0.11010  
9.00 90 100 -0.14009  
8.75 90 100 -0.17980  
8.50 90 100 -0.23268  
8.25 90 100 -0.30341  
8.00 90 100 -0.39834  
7.75 90 100 -0.52610  
7.50 90 100 -0.69830  
7.25 90 100 -0.93061  
7.00 90 100 -1.24409  
6.75 90 100 -1.66697  
6.50 90 100 -2.23711  
6.25 90 100 -3.00530  
6.00 90 100 -4.03980  
5.75 90 100 -5.43265  
5.50 90 100 -7.30835  
5.25 90 100 -9.83545  
5.00 90 100 -13.24104  
4.75 90 100 -17.82525  
4.50 90 100 -23.96510  
4.25 90 100 -32.07420  
4.00 90 100 -42.42515  
3.75 90 100 -54.58755  
3.50 90 100 -65.85238  
3.25 90 100 -67.09877  
3.00 90 100 -32.45985  
2.75 90 100 105.38752  
2.50 90 100 511.39273  
2.25 90 100 1567.46486  
100.00 90 110 -0.00000  
50.00 90 110 -0.00000  
40.00 90 110 -0.00000  
30.00 90 110 -0.00003  
25.00 90 110 -0.00010  
20.00 90 110 -0.00043  
18.00 90 110 -0.00088  
16.00 90 110 -0.00198  
14.00 90 110 -0.00503  
13.00 90 110 -0.00853  
12.00 90 110 -0.01526  
11.00 90 110 -0.02930  
10.50 90 110 -0.04200  
10.00 90 110 -0.06192  
9.75 90 110 -0.07608  
9.50 90 110 -0.09427  
9.25 90 110 -0.11786  
9.00 90 110 -0.14871  
8.75 90 110 -0.18938  
8.50 90 110 -0.24342  
8.25 90 110 -0.31572  
8.00 90 110 -0.41305  
7.75 90 110 -0.54479  
7.50 90 110 -0.72387  
7.25 90 110 -0.96813  
7.00 90 110 -1.30213  
6.75 90 110 -1.75957  
6.50 90 110 -2.38645  
6.25 90 110 -3.24539  
6.00 90 110 -4.42102  
5.75 90 110 -6.02689  
5.50 90 110 -8.21373  
5.25 90 110 -11.17841  
5.00 90 110 -15.17095  
4.75 90 110 -20.49261  
4.50 90 110 -27.46551  
4.25 90 110 -36.32327  
4.00 90 110 -46.89229  
3.75 90 110 -57.73150  
3.50 90 110 -63.89923  
3.25 90 110 -51.31398  
3.00 90 110 17.09965  
2.75 90 110 234.33725  
2.50 90 110 824.16738

2.25 90 110 2300.62171  
 100.00 90 120 -0.00000  
 50.00 90 120 -0.00000  
 40.00 90 120 -0.00001  
 30.00 90 120 -0.00004  
 25.00 90 120 -0.00013  
 20.00 90 120 -0.00054  
 18.00 90 120 -0.00110  
 16.00 90 120 -0.00246  
 14.00 90 120 -0.00625  
 13.00 90 120 -0.01058  
 12.00 90 120 -0.01889  
 11.00 90 120 -0.03614  
 10.50 90 120 -0.05167  
 10.00 90 120 -0.07596  
 9.75 90 120 -0.09319  
 9.50 90 120 -0.11535  
 9.25 90 120 -0.14413  
 9.00 90 120 -0.18187  
 8.75 90 120 -0.23186  
 8.50 90 120 -0.29872  
 8.25 90 120 -0.38891  
 8.00 90 120 -0.51153  
 7.75 90 120 -0.67935  
 7.50 90 120 -0.91023  
 7.25 90 120 -1.22907  
 7.00 90 120 -1.67039  
 6.75 90 120 -2.28161  
 6.50 90 120 -3.12739  
 6.25 90 120 -4.29474  
 6.00 90 120 -5.89912  
 5.75 90 120 -8.09058  
 5.50 90 120 -11.05841  
 5.25 90 120 -15.02994  
 5.00 90 120 -20.25368  
 4.75 90 120 -26.94534  
 4.50 90 120 -35.14935  
 4.25 90 120 -44.41246  
 4.00 90 120 -53.03909  
 3.75 90 120 -56.40478  
 3.50 90 120 -43.10942  
 3.25 90 120 13.90154  
 3.00 90 120 178.01324  
 2.75 90 120 597.06526  
 2.50 90 120 1613.64215  
 2.25 90 120 4008.41209  
 100.00 90 130 -0.00000  
 50.00 90 130 -0.00000  
 40.00 90 130 -0.00001  
 30.00 90 130 -0.00005  
 25.00 90 130 -0.00016  
 20.00 90 130 -0.00070  
 18.00 90 130 -0.00141  
 16.00 90 130 -0.00316  
 14.00 90 130 -0.00806  
 13.00 90 130 -0.01371  
 12.00 90 130 -0.02466  
 11.00 90 130 -0.04767  
 10.50 90 130 -0.06871  
 10.00 90 130 -0.10213  
 9.75 90 130 -0.12620  
 9.50 90 130 -0.15752  
 9.25 90 130 -0.19876  
 9.00 90 130 -0.25367  
 8.75 90 130 -0.32758  
 8.50 90 130 -0.42806  
 8.25 90 130 -0.56584  
 8.00 90 130 -0.75606  
 7.75 90 130 -1.02001  
 7.50 90 130 -1.38733  
 7.25 90 130 -1.89892  
 7.00 90 130 -2.61048  
 6.75 90 130 -3.59671  
 6.50 90 130 -4.95584  
 6.25 90 130 -6.81369  
 6.00 90 130 -9.32510  
 5.75 90 130 -12.66813  
 5.50 90 130 -17.02018  
 5.25 90 130 -22.49412  
 5.00 90 130 -28.98931  
 4.75 90 130 -35.87216  
 4.50 90 130 -41.33016  
 4.25 90 130 -41.12448  
 4.00 90 130 -26.25314  
 3.75 90 130 21.39045  
 3.50 90 130 137.25168  
 3.25 90 130 390.46326  
 3.00 90 130 918.13574  
 2.75 90 130 2000.85573  
 2.50 90 130 4235.34479  
 2.25 90 130 7836.27590  
 100.00 90 140 -0.00000  
 50.00 90 140 -0.00000  
 40.00 90 140 -0.00001  
 30.00 90 140 -0.00006  
 25.00 90 140 -0.00020  
 20.00 90 140 -0.00088  
 18.00 90 140 -0.00180  
 16.00 90 140 -0.00406  
 14.00 90 140 -0.01047  
 13.00 90 140 -0.01799  
 12.00 90 140 -0.03282  
 11.00 90 140 -0.06497

10.50 90 140 -0.09533  
10.00 90 140 -0.14516  
9.75 90 140 -0.18206  
9.50 90 140 -0.23111  
9.25 90 140 -0.29711  
9.00 90 140 -0.38695  
8.75 90 140 -0.51048  
8.50 90 140 -0.68171  
8.25 90 140 -0.92048  
8.00 90 140 -1.25460  
7.75 90 140 -1.72256  
7.50 90 140 -2.37682  
7.25 90 140 -3.28743  
7.00 90 140 -4.54553  
6.75 90 140 -6.26531  
6.50 90 140 -8.58128  
6.25 90 140 -11.63371  
6.00 90 140 -15.52602  
5.75 90 140 -20.21914  
5.50 90 140 -25.29078  
5.25 90 140 -29.42130  
5.00 90 140 -29.36409  
4.75 90 140 -18.02770  
4.50 90 140 18.80791  
4.25 90 140 107.59676  
4.00 90 140 294.23272  
3.75 90 140 653.75865  
3.50 90 140 1305.01037  
3.25 90 140 2439.25723  
3.00 90 140 4384.51211  
2.75 90 140 7265.02002  
2.50 90 140 8882.54932  
2.25 90 140 9488.48862  
100.00 90 150 -0.00000  
50.00 90 150 -0.00000  
40.00 90 150 -0.00001  
30.00 90 150 -0.00007  
25.00 90 150 -0.00024  
20.00 90 150 -0.00108  
18.00 90 150 -0.00222  
16.00 90 150 -0.00505  
14.00 90 150 -0.01327  
13.00 90 150 -0.02312  
12.00 90 150 -0.04300  
11.00 90 150 -0.08789  
10.50 90 150 -0.13216  
10.00 90 150 -0.20782  
9.75 90 150 -0.26568  
9.50 90 150 -0.34436  
9.25 90 150 -0.45262  
9.00 90 150 -0.60305  
8.75 90 150 -0.81368  
8.50 90 150 -1.11003  
8.25 90 150 -1.52787  
8.00 90 150 -2.11639  
7.75 90 150 -2.94191  
7.50 90 150 -4.09111  
7.25 90 150 -5.67245  
7.00 90 150 -7.81158  
6.75 90 150 -10.63135  
6.50 90 150 -14.19399  
6.25 90 150 -18.35277  
6.00 90 150 -22.39465  
5.75 90 150 -24.21899  
5.50 90 150 -18.54272  
5.25 90 150 6.78750  
5.00 90 150 77.78247  
4.75 90 150 246.12182  
4.50 90 150 605.86921  
4.25 90 150 1310.28891  
4.00 90 150 2575.70726  
3.75 90 150 4657.81446  
3.50 90 150 7306.80110  
3.25 90 150 8704.46075  
3.00 90 150 9291.39435  
2.75 90 150 9590.94204  
2.50 90 150 9761.81414  
2.25 90 150 9857.65521  
100.00 90 160 -0.00000  
50.00 90 160 -0.00000  
40.00 90 160 -0.00001  
30.00 90 160 -0.00009  
25.00 90 160 -0.00028  
20.00 90 160 -0.00126  
18.00 90 160 -0.00260  
16.00 90 160 -0.00600  
14.00 90 160 -0.01603  
13.00 90 160 -0.02828  
12.00 90 160 -0.05366  
11.00 90 160 -0.11337  
10.50 90 160 -0.17481  
10.00 90 160 -0.28380  
9.75 90 160 -0.36948  
9.50 90 160 -0.48816  
9.25 90 160 -0.65420  
9.00 90 160 -0.88830  
8.75 90 160 -1.21990  
8.50 90 160 -1.69035  
8.25 90 160 -2.35659  
8.00 90 160 -3.29507  
7.75 90 160 -4.60464  
7.50 90 160 -6.40531  
7.25 90 160 -8.82552

7.00 90 160 -11.95864  
6.75 90 160 -15.74113  
6.50 90 160 -19.63397  
6.25 90 160 -21.82102  
6.00 90 160 -17.25866  
5.75 90 160 6.88984  
5.50 90 160 81.41955  
5.25 90 160 276.19898  
5.00 90 160 739.65078  
4.75 90 160 1760.10093  
4.50 90 160 3826.38264  
4.25 90 160 7175.38855  
4.00 90 160 8867.40631  
3.75 90 160 9398.31640  
3.50 90 160 9642.72389  
3.25 90 160 9780.38205  
3.00 90 160 9862.11986  
2.75 90 160 9912.29392  
2.50 90 160 9943.74685  
2.25 90 160 9963.72973  
100.00 90 170 -0.00000  
50.00 90 170 -0.00000  
40.00 90 170 -0.00001  
30.00 90 170 -0.00009  
25.00 90 170 -0.00031  
20.00 90 170 -0.00138  
18.00 90 170 -0.00288  
16.00 90 170 -0.00669  
14.00 90 170 -0.01810  
13.00 90 170 -0.03223  
12.00 90 170 -0.06205  
11.00 90 170 -0.13445  
10.50 90 170 -0.21124  
10.00 90 170 -0.35099  
9.75 90 170 -0.46279  
9.50 90 170 -0.61939  
9.25 90 170 -0.84063  
9.00 90 170 -1.15503  
8.75 90 170 -1.60292  
8.50 90 170 -2.24042  
8.25 90 170 -3.14360  
8.00 90 170 -4.41186  
7.75 90 170 -6.16733  
7.50 90 170 -8.54218  
7.25 90 170 -11.63295  
7.00 90 170 -15.36714  
6.75 90 170 -19.13929  
6.50 90 170 -20.85074  
6.25 90 170 -14.43864  
6.00 90 170 16.30821  
5.75 90 170 112.67842  
5.50 90 170 375.28687  
5.25 90 170 1036.59181  
5.00 90 170 2593.08891  
4.75 90 170 5940.00664  
4.50 90 170 8711.01909  
4.25 90 170 9434.81924  
4.00 90 170 9713.32448  
3.75 90 170 9847.15763  
3.50 90 170 9916.35062  
3.25 90 170 9953.56800  
3.00 90 170 9974.02546  
2.75 90 170 9985.40660  
2.50 90 170 9991.78103  
2.25 90 170 9995.36479  
100.00 90 180 -0.00000  
50.00 90 180 -0.00000  
40.00 90 180 -0.00002  
30.00 90 180 -0.00010  
25.00 90 180 -0.00032  
20.00 90 180 -0.00143  
18.00 90 180 -0.00298  
16.00 90 180 -0.00694  
14.00 90 180 -0.01887  
13.00 90 180 -0.03373  
12.00 90 180 -0.06528  
11.00 90 180 -0.14278  
10.50 90 180 -0.22589  
10.00 90 180 -0.37850  
9.75 90 180 -0.50131  
9.50 90 180 -0.67397  
9.25 90 180 -0.91867  
9.00 90 180 -1.26723  
8.75 90 180 -1.76460  
8.50 90 180 -2.47301  
8.25 90 180 -3.47627  
8.00 90 180 -4.88244  
7.75 90 180 -6.82073  
7.50 90 180 -9.42105  
7.25 90 180 -12.74621  
7.00 90 180 -16.59703  
6.75 90 180 -19.97982  
6.50 90 180 -19.68929  
6.25 90 180 -6.61997  
6.00 90 180 43.58607  
5.75 90 180 193.43309  
5.50 90 180 596.76760  
5.25 90 180 1611.87193  
5.00 90 180 4000.39471  
4.75 90 180 7900.61029  
4.50 90 180 9253.37450  
4.25 90 180 9651.45982  
4.00 90 180 9825.25986

3.75 90 180 9909.24976  
3.50 90 180 9952.01248  
3.25 90 180 9974.38445  
3.00 90 180 9986.25794  
2.75 90 180 9992.60801  
2.50 90 180 9996.01806  
2.25 90 180 9997.85334  
100.00 100 0 -0.00000  
50.00 100 0 -0.00000  
40.00 100 0 -0.00001  
30.00 100 0 -0.00006  
25.00 100 0 -0.00019  
20.00 100 0 -0.00080  
18.00 100 0 -0.00163  
16.00 100 0 -0.00374  
14.00 100 0 -0.01036  
13.00 100 0 -0.01937  
12.00 100 0 -0.04112  
11.00 100 0 -0.10290  
10.50 100 0 -0.17313  
10.00 100 0 -0.30114  
9.75 100 0 -0.40096  
9.50 100 0 -0.53638  
9.25 100 0 -0.72011  
9.00 100 0 -0.96931  
8.75 100 0 -1.30728  
8.50 100 0 -1.76604  
8.25 100 0 -2.39025  
8.00 100 0 -3.24338  
7.75 100 0 -4.41703  
7.50 100 0 -6.04342  
7.25 100 0 -8.30692  
7.00 100 0 -11.43608  
6.75 100 0 -15.61641  
6.50 100 0 -20.65429  
6.25 100 0 -24.94782  
6.00 100 0 -22.66597  
5.75 100 0 3.45008  
5.50 100 0 99.48087  
5.25 100 0 380.41160  
5.00 100 0 1118.53187  
4.75 100 0 2931.14102  
4.50 100 0 6911.09834  
4.25 100 0 9182.15976  
4.00 100 0 9719.58977  
3.75 100 0 9891.57014  
3.50 100 0 9956.13496  
3.25 100 0 9981.93370  
3.00 100 0 9992.50458  
2.75 100 0 9996.88086  
2.50 100 0 9998.70037  
2.25 100 0 9999.45821  
100.00 100 10 -0.00000  
50.00 100 10 -0.00000  
40.00 100 10 -0.00001  
30.00 100 10 -0.00006  
25.00 100 10 -0.00018  
20.00 100 10 -0.00078  
18.00 100 10 -0.00159  
16.00 100 10 -0.00366  
14.00 100 10 -0.01008  
13.00 100 10 -0.01879  
12.00 100 10 -0.03973  
11.00 100 10 -0.09895  
10.50 100 10 -0.16612  
10.00 100 10 -0.28832  
9.75 100 10 -0.38347  
9.50 100 10 -0.51239  
9.25 100 10 -0.68700  
9.00 100 10 -0.92330  
8.75 100 10 -1.24281  
8.50 100 10 -1.67476  
8.25 100 10 -2.25938  
8.00 100 10 -3.05298  
7.75 100 10 -4.13588  
7.50 100 10 -5.62344  
7.25 100 10 -7.67827  
7.00 100 10 -10.51225  
6.75 100 10 -14.34013  
6.50 100 10 -19.17493  
6.25 100 10 -24.17890  
6.00 100 10 -25.87331  
5.75 100 10 -13.61076  
5.50 100 10 41.13488  
5.25 100 10 208.60022  
5.00 100 10 650.47611  
4.75 100 10 1716.24194  
4.50 100 10 4112.90624  
4.25 100 10 7927.36344  
4.00 100 10 9310.66477  
3.75 100 10 9718.77201  
3.50 100 10 9875.08577  
3.25 100 10 9942.43019  
3.00 100 10 9973.02014  
2.75 100 10 9987.25743  
2.50 100 10 9993.95968  
2.25 100 10 9997.13177  
100.00 100 20 -0.00000  
50.00 100 20 -0.00000  
40.00 100 20 -0.00001  
30.00 100 20 -0.00006  
25.00 100 20 -0.00017  
20.00 100 20 -0.00073

18.00 100 20 -0.00149  
 16.00 100 20 -0.00341  
 14.00 100 20 -0.00932  
 13.00 100 20 -0.01722  
 12.00 100 20 -0.03600  
 11.00 100 20 -0.08850  
 10.50 100 20 -0.14766  
 10.00 100 20 -0.25482  
 9.75 100 20 -0.33798  
 9.50 100 20 -0.45035  
 9.25 100 20 -0.60200  
 9.00 100 20 -0.80628  
 8.75 100 20 -1.08078  
 8.50 100 20 -1.44874  
 8.25 100 20 -1.94102  
 8.00 100 20 -2.59915  
 7.75 100 20 -3.48006  
 7.50 100 20 -4.66321  
 7.25 100 20 -6.26057  
 7.00 100 20 -8.42712  
 6.75 100 20 -11.36156  
 6.50 100 20 -15.26425  
 6.25 100 20 -20.16382  
 6.00 100 20 -25.39836  
 5.75 100 20 -28.27466  
 5.50 100 20 -20.92615  
 5.25 100 20 16.46779  
 5.00 100 20 129.16502  
 4.75 100 20 412.30943  
 4.50 100 20 1050.47051  
 4.25 100 20 2372.60437  
 4.00 100 20 4915.01846  
 3.75 100 20 8036.25925  
 3.50 100 20 9194.94590  
 3.25 100 20 9608.07065  
 3.00 100 20 9796.22794  
 2.75 100 20 9890.19189  
 2.50 100 20 9939.69214  
 2.25 100 20 9966.53474  
 100.00 100 30 -0.00000  
 50.00 100 30 -0.00000  
 40.00 100 30 -0.00001  
 30.00 100 30 -0.00005  
 25.00 100 30 -0.00016  
 20.00 100 30 -0.00066  
 18.00 100 30 -0.00134  
 16.00 100 30 -0.00306  
 14.00 100 30 -0.00825  
 13.00 100 30 -0.01508  
 12.00 100 30 -0.03100  
 11.00 100 30 -0.07471  
 10.50 100 30 -0.12349  
 10.00 100 30 -0.21141  
 9.75 100 30 -0.27944  
 9.50 100 30 -0.37114  
 9.25 100 30 -0.49458  
 9.00 100 30 -0.66031  
 8.75 100 30 -0.88201  
 8.50 100 30 -1.17730  
 8.25 100 30 -1.56877  
 8.00 100 30 -2.08544  
 7.75 100 30 -2.76491  
 7.50 100 30 -3.65671  
 7.25 100 30 -4.82763  
 7.00 100 30 -6.36949  
 6.75 100 30 -8.40868  
 6.50 100 30 -11.11229  
 6.25 100 30 -14.67337  
 6.00 100 30 -19.22836  
 5.75 100 30 -24.59619  
 5.50 100 30 -29.60138  
 5.25 100 30 -30.51027  
 5.00 100 30 -17.71988  
 4.75 100 30 30.74833  
 4.50 100 30 161.17534  
 4.25 100 30 464.59930  
 4.00 100 30 1109.65443  
 3.75 100 30 2391.46194  
 3.50 100 30 4795.88428  
 3.25 100 30 7883.92882  
 3.00 100 30 9117.27903  
 2.75 100 30 9548.67868  
 2.50 100 30 9746.43500  
 2.25 100 30 9852.75751  
 100.00 100 40 -0.00000  
 50.00 100 40 -0.00000  
 40.00 100 40 -0.00001  
 30.00 100 40 -0.00004  
 25.00 100 40 -0.00014  
 20.00 100 40 -0.00058  
 18.00 100 40 -0.00118  
 16.00 100 40 -0.00266  
 14.00 100 40 -0.00711  
 13.00 100 40 -0.01282  
 12.00 100 40 -0.02583  
 11.00 100 40 -0.06069  
 10.50 100 40 -0.09912  
 10.00 100 40 -0.16800  
 9.75 100 40 -0.22115  
 9.50 100 40 -0.29272  
 9.25 100 40 -0.38900  
 9.00 100 40 -0.51820  
 8.75 100 40 -0.69091

8.50 100 40 -0.92065  
8.25 100 40 -1.22448  
8.00 100 40 -1.62375  
7.75 100 40 -2.14504  
7.50 100 40 -2.82156  
7.25 100 40 -3.69546  
7.00 100 40 -4.82157  
6.75 100 40 -6.27347  
6.50 100 40 -8.15210  
6.25 100 40 -10.59513  
6.00 100 40 -13.77846  
5.75 100 40 -17.88530  
5.50 100 40 -22.98216  
5.25 100 40 -28.66895  
5.00 100 40 -33.23424  
4.75 100 40 -31.81173  
4.50 100 40 -12.66486  
4.25 100 40 49.77038  
4.00 100 40 206.91498  
3.75 100 40 554.79556  
3.50 100 40 1258.71863  
3.25 100 40 2575.25696  
3.00 100 40 4846.82992  
2.75 100 40 7617.53007  
2.50 100 40 8862.17404  
2.25 100 40 9338.44875  
100.00 100 50 -0.00000  
50.00 100 50 -0.00000  
40.00 100 50 -0.00001  
30.00 100 50 -0.00004  
25.00 100 50 -0.00012  
20.00 100 50 -0.00050  
18.00 100 50 -0.00101  
16.00 100 50 -0.00229  
14.00 100 50 -0.00605  
13.00 100 50 -0.01077  
12.00 100 50 -0.02124  
11.00 100 50 -0.04847  
10.50 100 50 -0.07797  
10.00 100 50 -0.13044  
9.75 100 50 -0.17080  
9.50 100 50 -0.22512  
9.25 100 50 -0.29820  
9.00 100 50 -0.39636  
8.75 100 50 -0.52782  
8.50 100 50 -0.70310  
8.25 100 50 -0.93553  
8.00 100 50 -1.24174  
7.75 100 50 -1.64230  
7.50 100 50 -2.16238  
7.25 100 50 -2.83293  
7.00 100 50 -3.69235  
6.75 100 50 -4.78974  
6.50 100 50 -6.19017  
6.25 100 50 -7.98323  
6.00 100 50 -10.29430  
5.75 100 50 -13.29486  
5.50 100 50 -17.19772  
5.25 100 50 -22.20169  
5.00 100 50 -28.30476  
4.75 100 50 -34.82297  
4.50 100 50 -39.31309  
4.25 100 50 -35.39488  
4.00 100 50 -8.73756  
3.75 100 50 69.62785  
3.50 100 50 253.07857  
3.25 100 50 630.99364  
3.00 100 50 1337.59106  
2.75 100 50 2551.17949  
2.50 100 50 4489.37677  
2.25 100 50 7099.23487  
100.00 100 60 -0.00000  
50.00 100 60 -0.00000  
40.00 100 60 -0.00001  
30.00 100 60 -0.00003  
25.00 100 60 -0.00010  
20.00 100 60 -0.00043  
18.00 100 60 -0.00087  
16.00 100 60 -0.00197  
14.00 100 60 -0.00517  
13.00 100 60 -0.00912  
12.00 100 60 -0.01761  
11.00 100 60 -0.03888  
10.50 100 60 -0.06142  
10.00 100 60 -0.10102  
9.75 100 60 -0.13133  
9.50 100 60 -0.17202  
9.25 100 60 -0.22675  
9.00 100 60 -0.30031  
8.75 100 60 -0.39904  
8.50 100 60 -0.53112  
8.25 100 60 -0.70707  
8.00 100 60 -0.94016  
7.75 100 60 -1.24695  
7.50 100 60 -1.64792  
7.25 100 60 -2.16814  
7.00 100 60 -2.83841  
6.75 100 60 -3.69699  
6.50 100 60 -4.79280  
6.25 100 60 -6.19091  
6.00 100 60 -7.98157  
5.75 100 60 -10.29370  
5.50 100 60 -13.31120

5.25 100 60 -17.28505  
 5.00 100 60 -22.51966  
 4.75 100 60 -29.28398  
 4.50 100 60 -37.54640  
 4.25 100 60 -46.34813  
 4.00 100 60 -52.50915  
 3.75 100 60 -48.21950  
 3.50 100 60 -16.95319  
 3.25 100 60 72.91180  
 3.00 100 60 277.64480  
 2.75 100 60 693.85740  
 2.50 100 60 1492.87538  
 2.25 100 60 3016.80409  
 100.00 100 70 -0.00000  
 50.00 100 70 -0.00000  
 40.00 100 70 -0.00000  
 30.00 100 70 -0.00003  
 25.00 100 70 -0.00008  
 20.00 100 70 -0.00037  
 18.00 100 70 -0.00076  
 16.00 100 70 -0.00173  
 14.00 100 70 -0.00454  
 13.00 100 70 -0.00793  
 12.00 100 70 -0.01501  
 11.00 100 70 -0.03205  
 10.50 100 70 -0.04957  
 10.00 100 70 -0.07984  
 9.75 100 70 -0.10278  
 9.50 100 70 -0.13346  
 9.25 100 70 -0.17460  
 9.00 100 70 -0.22984  
 8.75 100 70 -0.30403  
 8.50 100 70 -0.40354  
 8.25 100 70 -0.53662  
 8.00 100 70 -0.71393  
 7.75 100 70 -0.94897  
 7.50 100 70 -1.25875  
 7.25 100 70 -1.66444  
 7.00 100 70 -2.19230  
 6.75 100 70 -2.87502  
 6.50 100 70 -3.75378  
 6.25 100 70 -4.88199  
 6.00 100 70 -6.33139  
 5.75 100 70 -8.20235  
 5.50 100 70 -10.63946  
 5.25 100 70 -13.85271  
 5.00 100 70 -18.14053  
 4.75 100 70 -23.90066  
 4.50 100 70 -31.59437  
 4.25 100 70 -41.58825  
 4.00 100 70 -53.72333  
 3.75 100 70 -66.32737  
 3.50 100 70 -74.13609  
 3.25 100 70 -64.06634  
 3.00 100 70 -6.52212  
 2.75 100 70 163.41234  
 2.50 100 70 589.22520  
 2.25 100 70 1595.39637  
 100.00 100 80 -0.00000  
 50.00 100 80 -0.00000  
 40.00 100 80 -0.00000  
 30.00 100 80 -0.00002  
 25.00 100 80 -0.00008  
 20.00 100 80 -0.00034  
 18.00 100 80 -0.00070  
 16.00 100 80 -0.00159  
 14.00 100 80 -0.00417  
 13.00 100 80 -0.00722  
 12.00 100 80 -0.01345  
 11.00 100 80 -0.02777  
 10.50 100 80 -0.04200  
 10.00 100 80 -0.06602  
 9.75 100 80 -0.08398  
 9.50 100 80 -0.10781  
 9.25 100 80 -0.13959  
 9.00 100 80 -0.18209  
 8.75 100 80 -0.23907  
 8.50 100 80 -0.31550  
 8.25 100 80 -0.41794  
 8.00 100 80 -0.55501  
 7.75 100 80 -0.73785  
 7.50 100 80 -0.98079  
 7.25 100 80 -1.30210  
 7.00 100 80 -1.72496  
 6.75 100 80 -2.27872  
 6.50 100 80 -3.00077  
 6.25 100 80 -3.93937  
 6.00 100 80 -5.15837  
 5.75 100 80 -6.74466  
 5.50 100 80 -8.82023  
 5.25 100 80 -11.56004  
 5.00 100 80 -15.21625  
 4.75 100 80 -20.14475  
 4.50 100 80 -26.81890  
 4.25 100 80 -35.78841  
 4.00 100 80 -47.48117  
 3.75 100 80 -61.61189  
 3.50 100 80 -75.66071  
 3.25 100 80 -81.19561  
 3.00 100 80 -55.20429  
 2.75 100 80 60.13750  
 2.50 100 80 404.15586  
 2.25 100 80 1302.25149

100.00 100 90 -0.00000  
50.00 100 90 -0.00000  
40.00 100 90 -0.00000  
30.00 100 90 -0.00002  
25.00 100 90 -0.00007  
20.00 100 90 -0.00033  
18.00 100 90 -0.00069  
16.00 100 90 -0.00157  
14.00 100 90 -0.00409  
13.00 100 90 -0.00704  
12.00 100 90 -0.01289  
11.00 100 90 -0.02584  
10.50 100 90 -0.03824  
10.00 100 90 -0.05863  
9.75 100 90 -0.07361  
9.50 100 90 -0.09327  
9.25 100 90 -0.11926  
9.00 100 90 -0.15378  
8.75 100 90 -0.19983  
8.50 100 90 -0.26143  
8.25 100 90 -0.34398  
8.00 100 90 -0.45468  
7.75 100 90 -0.60303  
7.50 100 90 -0.80156  
7.25 100 90 -1.06665  
7.00 100 90 -1.41966  
6.75 100 90 -1.88841  
6.50 100 90 -2.50915  
6.25 100 90 -3.32944  
6.00 100 90 -4.41242  
5.75 100 90 -5.84320  
5.50 100 90 -7.73848  
5.25 100 90 -10.26064  
5.00 100 90 -13.63670  
4.75 100 90 -18.17958  
4.50 100 90 -24.30033  
4.25 100 90 -32.47552  
4.00 100 90 -43.07470  
3.75 100 90 -55.80715  
3.50 100 90 -68.20143  
3.25 100 90 -71.71848  
3.00 100 90 -42.23049  
2.75 100 90 82.55149  
2.50 100 90 454.71803  
2.25 100 90 1428.32759  
100.00 100 100 -0.00000  
50.00 100 100 -0.00000  
40.00 100 100 -0.00000  
30.00 100 100 -0.00002  
25.00 100 100 -0.00008  
20.00 100 100 -0.00036  
18.00 100 100 -0.00075  
16.00 100 100 -0.00169  
14.00 100 100 -0.00435  
13.00 100 100 -0.00744  
12.00 100 100 -0.01345  
11.00 100 100 -0.02628  
10.50 100 100 -0.03819  
10.00 100 100 -0.05726  
9.75 100 100 -0.07102  
9.50 100 100 -0.08887  
9.25 100 100 -0.11222  
9.00 100 100 -0.14296  
8.75 100 100 -0.18369  
8.50 100 100 -0.23794  
8.25 100 100 -0.31052  
8.00 100 100 -0.40793  
7.75 100 100 -0.53898  
7.50 100 100 -0.71554  
7.25 100 100 -0.95359  
7.00 100 100 -1.27457  
6.75 100 100 -1.70722  
6.50 100 100 -2.29007  
6.25 100 100 -3.07478  
6.00 100 100 -4.13087  
5.75 100 100 -5.55209  
5.50 100 100 -7.46528  
5.25 100 100 -10.04189  
5.00 100 100 -13.51174  
4.75 100 100 -18.17494  
4.50 100 100 -24.39831  
4.25 100 100 -32.55691  
4.00 100 100 -42.81411  
3.75 100 100 -54.46639  
3.50 100 100 -64.16768  
3.25 100 100 -61.36819  
3.00 100 100 -17.04253  
2.75 100 100 143.16984  
2.50 100 100 600.25856  
2.25 100 100 1773.36498  
100.00 100 110 -0.00000  
50.00 100 110 -0.00000  
40.00 100 110 -0.00000  
30.00 100 110 -0.00003  
25.00 100 110 -0.00010  
20.00 100 110 -0.00043  
18.00 100 110 -0.00088  
16.00 100 110 -0.00198  
14.00 100 110 -0.00504  
13.00 100 110 -0.00856  
12.00 100 110 -0.01533  
11.00 100 110 -0.02948  
10.50 100 110 -0.04233

10.00 100 110 -0.06251  
9.75 100 110 -0.07688  
9.50 100 110 -0.09535  
9.25 100 110 -0.11933  
9.00 100 110 -0.15071  
8.75 100 110 -0.19210  
8.50 100 110 -0.24712  
8.25 100 110 -0.32076  
8.00 100 110 -0.41990  
7.75 100 110 -0.55407  
7.50 100 110 -0.73642  
7.25 100 110 -0.98505  
7.00 100 110 -1.32489  
6.75 100 110 -1.79007  
6.50 100 110 -2.42725  
6.25 100 110 -3.29984  
6.00 100 110 -4.49361  
5.75 100 110 -6.12367  
5.50 100 110 -8.34281  
5.25 100 110 -11.35047  
5.00 100 110 -15.39938  
4.75 100 110 -20.79214  
4.50 100 110 -27.84655  
4.25 100 110 -36.77581  
4.00 100 110 -47.34554  
3.75 100 110 -57.95996  
3.50 100 110 -63.30908  
3.25 100 110 -48.45155  
3.00 100 110 25.73705  
2.75 100 110 257.36880  
2.50 100 110 883.59384  
2.25 100 110 2454.00532  
100.00 100 120 -0.00000  
50.00 100 120 -0.00000  
40.00 100 120 -0.00001  
30.00 100 120 -0.00004  
25.00 100 120 -0.00012  
20.00 100 120 -0.00054  
18.00 100 120 -0.00110  
16.00 100 120 -0.00246  
14.00 100 120 -0.00625  
13.00 100 120 -0.01059  
12.00 100 120 -0.01892  
11.00 100 120 -0.03625  
10.50 100 120 -0.05188  
10.00 100 120 -0.07634  
9.75 100 120 -0.09372  
9.50 100 120 -0.11607  
9.25 100 120 -0.14511  
9.00 100 120 -0.18321  
8.75 100 120 -0.23371  
8.50 100 120 -0.30125  
8.25 100 120 -0.39238  
8.00 100 120 -0.51629  
7.75 100 120 -0.68586  
7.50 100 120 -0.91913  
7.25 100 120 -1.24122  
7.00 100 120 -1.68695  
6.75 100 120 -2.30414  
6.50 100 120 -3.15800  
6.25 100 120 -4.33630  
6.00 100 120 -5.95549  
5.75 100 120 -8.16703  
5.50 100 120 -11.16208  
5.25 100 120 -15.17035  
5.00 100 120 -20.44318  
4.75 100 120 -27.19893  
4.50 100 120 -35.48288  
4.25 100 120 -44.83681  
4.00 100 120 -53.54553  
3.75 100 120 -56.93026  
3.50 100 120 -43.45032  
3.25 100 120 14.33024  
3.00 100 120 180.93024  
2.75 100 120 607.78241  
2.50 100 120 1648.94046  
2.25 100 120 4120.11794  
100.00 100 130 -0.00000  
50.00 100 130 -0.00000  
40.00 100 130 -0.00001  
30.00 100 130 -0.00005  
25.00 100 130 -0.00016  
20.00 100 130 -0.00070  
18.00 100 130 -0.00141  
16.00 100 130 -0.00316  
14.00 100 130 -0.00806  
13.00 100 130 -0.01371  
12.00 100 130 -0.02467  
11.00 100 130 -0.04773  
10.50 100 130 -0.06883  
10.00 100 130 -0.10236  
9.75 100 130 -0.12652  
9.50 100 130 -0.15797  
9.25 100 130 -0.19937  
9.00 100 130 -0.25452  
8.75 100 130 -0.32876  
8.50 100 130 -0.42971  
8.25 100 130 -0.56812  
8.00 100 130 -0.75923  
7.75 100 130 -1.02440  
7.50 100 130 -1.39341  
7.25 100 130 -1.90733  
7.00 100 130 -2.62211

6.75 100 130 -3.61276  
6.50 100 130 -4.97798  
6.25 100 130 -6.84421  
6.00 100 130 -9.36718  
5.75 100 130 -12.72610  
5.50 100 130 -17.10002  
5.25 100 130 -22.60395  
5.00 100 130 -29.14009  
4.75 100 130 -36.07848  
4.50 100 130 -41.61148  
4.25 100 130 -41.50743  
4.00 100 130 -26.77708  
3.75 100 130 20.66218  
3.50 100 130 136.22027  
3.25 100 130 389.04547  
3.00 100 130 916.68837  
2.75 100 130 2002.17071  
2.50 100 130 4252.13884  
2.25 100 130 7867.12373  
100.00 100 140 -0.00000  
50.00 100 140 -0.00000  
40.00 100 140 -0.00001  
30.00 100 140 -0.00006  
25.00 100 140 -0.00020  
20.00 100 140 -0.00088  
18.00 100 140 -0.00180  
16.00 100 140 -0.00405  
14.00 100 140 -0.01046  
13.00 100 140 -0.01798  
12.00 100 140 -0.03282  
11.00 100 140 -0.06499  
10.50 100 140 -0.09538  
10.00 100 140 -0.14527  
9.75 100 140 -0.18223  
9.50 100 140 -0.23135  
9.25 100 140 -0.29746  
9.00 100 140 -0.38745  
8.75 100 140 -0.51119  
8.50 100 140 -0.68271  
8.25 100 140 -0.92190  
8.00 100 140 -1.25660  
7.75 100 140 -1.72537  
7.50 100 140 -2.38076  
7.25 100 140 -3.29295  
7.00 100 140 -4.55327  
6.75 100 140 -6.27614  
6.50 100 140 -8.59642  
6.25 100 140 -11.65484  
6.00 100 140 -15.55547  
5.75 100 140 -20.26009  
5.50 100 140 -25.34757  
5.25 100 140 -29.49972  
5.00 100 140 -29.47190  
4.75 100 140 -18.17557  
4.50 100 140 18.60384  
4.25 100 140 107.30734  
4.00 100 140 293.79564  
3.75 100 140 653.03123  
3.50 100 140 1303.68048  
3.25 100 140 2436.74221  
3.00 100 140 4380.10742  
2.75 100 140 7261.79641  
2.50 100 140 8882.76153  
2.25 100 140 9489.71098  
100.00 100 150 -0.00000  
50.00 100 150 -0.00000  
40.00 100 150 -0.00001  
30.00 100 150 -0.00007  
25.00 100 150 -0.00024  
20.00 100 150 -0.00108  
18.00 100 150 -0.00221  
16.00 100 150 -0.00505  
14.00 100 150 -0.01327  
13.00 100 150 -0.02311  
12.00 100 150 -0.04299  
11.00 100 150 -0.08789  
10.50 100 150 -0.13217  
10.00 100 150 -0.20787  
9.75 100 150 -0.26576  
9.50 100 150 -0.34448  
9.25 100 150 -0.45280  
9.00 100 150 -0.60332  
8.75 100 150 -0.81407  
8.50 100 150 -1.11060  
8.25 100 150 -1.52868  
8.00 100 150 -2.11756  
7.75 100 150 -2.94358  
7.50 100 150 -4.09349  
7.25 100 150 -5.67583  
7.00 100 150 -7.81634  
6.75 100 150 -10.63805  
6.50 100 150 -14.20335  
6.25 100 150 -18.36573  
6.00 100 150 -22.41230  
5.75 100 150 -24.24240  
5.50 100 150 -18.57228  
5.25 100 150 6.75343  
5.00 100 150 77.75033  
4.75 100 150 246.10699  
4.50 100 150 605.89952  
4.25 100 150 1310.39826  
4.00 100 150 2575.89580  
3.75 100 150 4657.93172

3.50 100 150 7306.52367  
3.25 100 150 8704.08664  
3.00 100 150 9291.07406  
2.75 100 150 9590.71696  
2.50 100 150 9761.69167  
2.25 100 150 9857.58786  
100.00 100 160 -0.00000  
50.00 100 160 -0.00000  
40.00 100 160 -0.00001  
30.00 100 160 -0.00009  
25.00 100 160 -0.00028  
20.00 100 160 -0.00126  
18.00 100 160 -0.00260  
16.00 100 160 -0.00600  
14.00 100 160 -0.01603  
13.00 100 160 -0.02828  
12.00 100 160 -0.05365  
11.00 100 160 -0.11337  
10.50 100 160 -0.17481  
10.00 100 160 -0.28383  
9.75 100 160 -0.36952  
9.50 100 160 -0.48821  
9.25 100 160 -0.65429  
9.00 100 160 -0.88844  
8.75 100 160 -1.22010  
8.50 100 160 -1.69064  
8.25 100 160 -2.35701  
8.00 100 160 -3.29570  
7.75 100 160 -4.60553  
7.50 100 160 -6.40659  
7.25 100 160 -8.82732  
7.00 100 160 -11.96114  
6.75 100 160 -15.74452  
6.50 100 160 -19.63837  
6.25 100 160 -21.82621  
6.00 100 160 -17.26337  
5.75 100 160 6.88970  
5.50 100 160 81.43512  
5.25 100 160 276.25778  
5.00 100 160 739.81511  
4.75 100 160 1760.49772  
4.50 100 160 3827.23184  
4.25 100 160 7176.33600  
4.00 100 160 8867.69490  
3.75 100 160 9398.41645  
3.50 100 160 9642.77766  
3.25 100 160 9780.41284  
3.00 100 160 9862.13822  
2.75 100 160 9912.30515  
2.50 100 160 9943.75384  
2.25 100 160 9963.73412  
100.00 100 170 -0.00000  
50.00 100 170 -0.00000  
40.00 100 170 -0.00001  
30.00 100 170 -0.00009  
25.00 100 170 -0.00031  
20.00 100 170 -0.00138  
18.00 100 170 -0.00288  
16.00 100 170 -0.00669  
14.00 100 170 -0.01810  
13.00 100 170 -0.03223  
12.00 100 170 -0.06205  
11.00 100 170 -0.13445  
10.50 100 170 -0.21125  
10.00 100 170 -0.35100  
9.75 100 170 -0.46281  
9.50 100 170 -0.61941  
9.25 100 170 -0.84067  
9.00 100 170 -1.15508  
8.75 100 170 -1.60300  
8.50 100 170 -2.24054  
8.25 100 170 -3.14377  
8.00 100 170 -4.41211  
7.75 100 170 -6.16768  
7.50 100 170 -8.54267  
7.25 100 170 -11.63361  
7.00 100 170 -15.36798  
6.75 100 170 -19.14023  
6.50 100 170 -20.85141  
6.25 100 170 -14.43788  
6.00 100 170 16.31375  
5.75 100 170 112.69774  
5.50 100 170 375.34307  
5.25 100 170 1036.74117  
5.00 100 170 2593.45772  
4.75 100 170 5940.76690  
4.50 100 170 8711.26810  
4.25 100 170 9434.90431  
4.00 100 170 9713.36746  
3.75 100 170 9847.18129  
3.50 100 170 9916.36423  
3.25 100 170 9953.57599  
3.00 100 170 9974.03021  
2.75 100 170 9985.40943  
2.50 100 170 9991.78272  
2.25 100 170 9995.36580  
100.00 100 180 -0.00000  
50.00 100 180 -0.00000  
40.00 100 180 -0.00002  
30.00 100 180 -0.00010  
25.00 100 180 -0.00032  
20.00 100 180 -0.00143  
18.00 100 180 -0.00298

16.00 100 180 -0.00694  
 14.00 100 180 -0.01887  
 13.00 100 180 -0.03373  
 12.00 100 180 -0.06528  
 11.00 100 180 -0.14278  
 10.50 100 180 -0.22589  
 10.00 100 180 -0.37850  
 9.75 100 180 -0.50131  
 9.50 100 180 -0.67397  
 9.25 100 180 -0.91867  
 9.00 100 180 -1.26723  
 8.75 100 180 -1.76460  
 8.50 100 180 -2.47301  
 8.25 100 180 -3.47627  
 8.00 100 180 -4.88244  
 7.75 100 180 -6.82073  
 7.50 100 180 -9.42105  
 7.25 100 180 -12.74621  
 7.00 100 180 -16.59703  
 6.75 100 180 -19.97982  
 6.50 100 180 -19.68929  
 6.25 100 180 -6.61997  
 6.00 100 180 43.58607  
 5.75 100 180 193.43309  
 5.50 100 180 596.76760  
 5.25 100 180 1611.87193  
 5.00 100 180 4000.39471  
 4.75 100 180 7900.61029  
 4.50 100 180 9253.37450  
 4.25 100 180 9651.45982  
 4.00 100 180 9825.25986  
 3.75 100 180 9909.24976  
 3.50 100 180 9952.01248  
 3.25 100 180 9974.38445  
 3.00 100 180 9986.25794  
 2.75 100 180 9992.60801  
 2.50 100 180 9996.01806  
 2.25 100 180 9997.85334  
 100.00 110 0 -0.00000  
 50.00 110 0 -0.00000  
 40.00 110 0 -0.00001  
 30.00 110 0 -0.00006  
 25.00 110 0 -0.00019  
 20.00 110 0 -0.00080  
 18.00 110 0 -0.00163  
 16.00 110 0 -0.00374  
 14.00 110 0 -0.01036  
 13.00 110 0 -0.01937  
 12.00 110 0 -0.04112  
 11.00 110 0 -0.10290  
 10.50 110 0 -0.17313  
 10.00 110 0 -0.30114  
 9.75 110 0 -0.40096  
 9.50 110 0 -0.53638  
 9.25 110 0 -0.72011  
 9.00 110 0 -0.96931  
 8.75 110 0 -1.30728  
 8.50 110 0 -1.76604  
 8.25 110 0 -2.39025  
 8.00 110 0 -3.24338  
 7.75 110 0 -4.41703  
 7.50 110 0 -6.04342  
 7.25 110 0 -8.30692  
 7.00 110 0 -11.43608  
 6.75 110 0 -15.61641  
 6.50 110 0 -20.65429  
 6.25 110 0 -24.94782  
 6.00 110 0 -22.66597  
 5.75 110 0 3.45008  
 5.50 110 0 99.48087  
 5.25 110 0 380.41160  
 5.00 110 0 1118.53187  
 4.75 110 0 2931.14102  
 4.50 110 0 6911.09834  
 4.25 110 0 9182.15976  
 4.00 110 0 9719.58977  
 3.75 110 0 9891.57014  
 3.50 110 0 9956.13496  
 3.25 110 0 9981.93370  
 3.00 110 0 9992.50458  
 2.75 110 0 9996.88086  
 2.50 110 0 9998.70037  
 2.25 110 0 9999.45821  
 100.00 110 10 -0.00000  
 50.00 110 10 -0.00000  
 40.00 110 10 -0.00001  
 30.00 110 10 -0.00006  
 25.00 110 10 -0.00018  
 20.00 110 10 -0.00078  
 18.00 110 10 -0.00159  
 16.00 110 10 -0.00366  
 14.00 110 10 -0.01010  
 13.00 110 10 -0.01882  
 12.00 110 10 -0.03983  
 11.00 110 10 -0.09926  
 10.50 110 10 -0.16668  
 10.00 110 10 -0.28935  
 9.75 110 10 -0.38486  
 9.50 110 10 -0.51426  
 9.25 110 10 -0.68951  
 9.00 110 10 -0.92662  
 8.75 110 10 -1.24720  
 8.50 110 10 -1.68051

8.25 110 10 -2.26686  
8.00 110 10 -3.06267  
7.75 110 10 -4.14842  
7.50 110 10 -5.63973  
7.25 110 10 -7.69973  
7.00 110 10 -10.54134  
6.75 110 10 -14.38136  
6.50 110 10 -19.23704  
6.25 110 10 -24.27927  
6.00 110 10 -26.04715  
5.75 110 10 -13.92985  
5.50 110 10 40.52525  
5.25 110 10 207.41312  
5.00 110 10 648.17547  
4.75 110 10 1711.93627  
4.50 110 10 4105.49306  
4.25 110 10 7923.51108  
4.00 110 10 9310.38111  
3.75 110 10 9718.96587  
3.50 110 10 9875.28863  
3.25 110 10 9942.57542  
3.00 110 10 9973.11240  
2.75 110 10 9987.31251  
2.50 110 10 9993.99127  
2.25 110 10 9997.14939  
100.00 110 20 -0.00000  
50.00 110 20 -0.00000  
40.00 110 20 -0.00001  
30.00 110 20 -0.00006  
25.00 110 20 -0.00017  
20.00 110 20 -0.00073  
18.00 110 20 -0.00150  
16.00 110 20 -0.00342  
14.00 110 20 -0.00937  
13.00 110 20 -0.01735  
12.00 110 20 -0.03634  
11.00 110 20 -0.08956  
10.50 110 20 -0.14959  
10.00 110 20 -0.25836  
9.75 110 20 -0.34277  
9.50 110 20 -0.45679  
9.25 110 20 -0.61063  
9.00 110 20 -0.81776  
8.75 110 20 -1.09594  
8.50 110 20 -1.46860  
8.25 110 20 -1.96685  
8.00 110 20 -2.63253  
7.75 110 20 -3.52302  
7.50 110 20 -4.71852  
7.25 110 20 -6.33235  
7.00 110 20 -8.52202  
6.75 110 20 -11.49120  
6.50 110 20 -15.44997  
6.25 110 20 -20.44609  
6.00 110 20 -25.85536  
5.75 110 20 -29.05853  
5.50 110 20 -22.33193  
5.25 110 20 13.87932  
5.00 110 20 124.37845  
4.75 110 20 403.66785  
4.50 110 20 1035.87333  
4.25 110 20 2351.41564  
4.00 110 20 4895.29216  
3.75 110 20 8042.50887  
3.50 110 20 9205.27584  
3.25 110 20 9616.39123  
3.00 110 20 9802.03097  
2.75 110 20 9894.11058  
2.50 110 20 9942.28459  
2.25 110 20 9968.22081  
100.00 110 30 -0.00000  
50.00 110 30 -0.00000  
40.00 110 30 -0.00001  
30.00 110 30 -0.00005  
25.00 110 30 -0.00016  
20.00 110 30 -0.00067  
18.00 110 30 -0.00135  
16.00 110 30 -0.00309  
14.00 110 30 -0.00836  
13.00 110 30 -0.01531  
12.00 110 30 -0.03161  
11.00 110 30 -0.07658  
10.50 110 30 -0.12691  
10.00 110 30 -0.21767  
9.75 110 30 -0.28789  
9.50 110 30 -0.38253  
9.25 110 30 -0.50984  
9.00 110 30 -0.68064  
8.75 110 30 -0.90891  
8.50 110 30 -1.21260  
8.25 110 30 -1.61473  
8.00 110 30 -2.14480  
7.75 110 30 -2.84109  
7.50 110 30 -3.75413  
7.25 110 30 -4.95236  
7.00 110 30 -6.53050  
6.75 110 30 -8.62023  
6.50 110 30 -11.39821  
6.25 110 30 -15.07446  
6.00 110 30 -19.81485  
5.75 110 30 -25.48758  
5.50 110 30 -30.99529  
5.25 110 30 -32.71492

5.00 110 30 -21.15574  
4.75 110 30 25.70705  
4.50 110 30 154.91984  
4.25 110 30 460.63604  
4.00 110 30 1121.03883  
3.75 110 30 2455.83303  
3.50 110 30 5004.30682  
3.25 110 30 8072.40368  
3.00 110 30 9196.34494  
2.75 110 30 9586.67226  
2.50 110 30 9766.36683  
2.25 110 30 9863.86603  
100.00 110 40 -0.00000  
50.00 110 40 -0.00000  
40.00 110 40 -0.00001  
30.00 110 40 -0.00004  
25.00 110 40 -0.00014  
20.00 110 40 -0.00059  
18.00 110 40 -0.00119  
16.00 110 40 -0.00271  
14.00 110 40 -0.00725  
13.00 110 40 -0.01313  
12.00 110 40 -0.02662  
11.00 110 40 -0.06310  
10.50 110 40 -0.10350  
10.00 110 40 -0.17602  
9.75 110 40 -0.23199  
9.50 110 40 -0.30734  
9.25 110 40 -0.40863  
9.00 110 40 -0.54441  
8.75 110 40 -0.72567  
8.50 110 40 -0.96640  
8.25 110 40 -1.28420  
8.00 110 40 -1.70105  
7.75 110 40 -2.24427  
7.50 110 40 -2.94814  
7.25 110 40 -3.85633  
7.00 110 40 -5.02617  
6.75 110 40 -6.53543  
6.50 110 40 -8.49209  
6.25 110 40 -11.04487  
6.00 110 40 -14.38564  
5.75 110 40 -18.71647  
5.50 110 40 -24.11561  
5.25 110 40 -30.15499  
5.00 110 40 -34.96609  
4.75 110 40 -33.16819  
4.50 110 40 -11.59972  
4.25 110 40 58.90878  
4.00 110 40 238.26802  
3.75 110 40 641.00288  
3.50 110 40 1468.83934  
3.25 110 40 3040.09367  
3.00 110 40 5763.28653  
2.75 110 40 8222.04597  
2.50 110 40 9113.33679  
2.25 110 40 9461.08983  
100.00 110 50 -0.00000  
50.00 110 50 -0.00000  
40.00 110 50 -0.00001  
30.00 110 50 -0.00004  
25.00 110 50 -0.00012  
20.00 110 50 -0.00051  
18.00 110 50 -0.00103  
16.00 110 50 -0.00234  
14.00 110 50 -0.00621  
13.00 110 50 -0.01111  
12.00 110 50 -0.02210  
11.00 110 50 -0.05101  
10.50 110 50 -0.08257  
10.00 110 50 -0.13884  
9.75 110 50 -0.18217  
9.50 110 50 -0.24046  
9.25 110 50 -0.31884  
9.00 110 50 -0.42400  
8.75 110 50 -0.56461  
8.50 110 50 -0.75173  
8.25 110 50 -0.99928  
8.00 110 50 -1.32462  
7.75 110 50 -1.74909  
7.50 110 50 -2.29889  
7.25 110 50 -3.00629  
7.00 110 50 -3.91169  
6.75 110 50 -5.06735  
6.50 110 50 -6.54339  
6.25 110 50 -8.43707  
6.00 110 50 -10.88402  
5.75 110 50 -14.06562  
5.50 110 50 -18.19336  
5.25 110 50 -23.42302  
5.00 110 50 -29.59255  
4.75 110 50 -35.56690  
4.50 110 50 -37.77793  
4.25 110 50 -27.24163  
4.00 110 50 16.05763  
3.75 110 50 132.79309  
3.50 110 50 398.77633  
3.25 110 50 942.36877  
3.00 110 50 1956.33227  
2.75 110 50 3688.17832  
2.50 110 50 6323.50426  
2.25 110 50 8309.27326  
100.00 110 60 -0.00000

50.00 110 60 -0.00000  
40.00 110 60 -0.00001  
30.00 110 60 -0.00003  
25.00 110 60 -0.00010  
20.00 110 60 -0.00043  
18.00 110 60 -0.00089  
16.00 110 60 -0.00202  
14.00 110 60 -0.00533  
13.00 110 60 -0.00945  
12.00 110 60 -0.01842  
11.00 110 60 -0.04124  
10.50 110 60 -0.06563  
10.00 110 60 -0.10869  
9.75 110 60 -0.14169  
9.50 110 60 -0.18603  
9.25 110 60 -0.24562  
9.00 110 60 -0.32566  
8.75 110 60 -0.43292  
8.50 110 60 -0.57612  
8.25 110 60 -0.76640  
8.00 110 60 -1.01776  
7.75 110 60 -1.34759  
7.50 110 60 -1.77732  
7.25 110 60 -2.33325  
7.00 110 60 -3.04779  
6.75 110 60 -3.96166  
6.50 110 60 -5.12757  
6.25 110 60 -6.61647  
6.00 110 60 -8.52705  
5.75 110 60 -10.99817  
5.50 110 60 -14.21991  
5.25 110 60 -18.42886  
5.00 110 60 -23.85177  
4.75 110 60 -30.51739  
4.50 110 60 -37.77449  
4.25 110 60 -43.21425  
4.00 110 60 -40.48207  
3.75 110 60 -15.19378  
3.50 110 60 62.05343  
3.25 110 60 246.54411  
3.00 110 60 634.75718  
2.75 110 60 1385.36143  
2.50 110 60 2755.52907  
2.25 110 60 5195.01005  
100.00 110 70 -0.00000  
50.00 110 70 -0.00000  
40.00 110 70 -0.00000  
30.00 110 70 -0.00003  
25.00 110 70 -0.00009  
20.00 110 70 -0.00038  
18.00 110 70 -0.00078  
16.00 110 70 -0.00178  
14.00 110 70 -0.00468  
13.00 110 70 -0.00823  
12.00 110 70 -0.01572  
11.00 110 70 -0.03404  
10.50 110 70 -0.05308  
10.00 110 70 -0.08618  
9.75 110 70 -0.11135  
9.50 110 70 -0.14503  
9.25 110 70 -0.19022  
9.00 110 70 -0.25088  
8.75 110 70 -0.33226  
8.50 110 70 -0.44123  
8.25 110 70 -0.58663  
8.00 110 70 -0.77982  
7.75 110 70 -1.03513  
7.50 110 70 -1.37049  
7.25 110 70 -1.80822  
7.00 110 70 -2.37604  
6.75 110 70 -3.10862  
6.50 110 70 -4.05015  
6.25 110 70 -5.25861  
6.00 110 70 -6.81270  
5.75 110 70 -8.82247  
5.50 110 70 -11.44345  
5.25 110 70 -14.89104  
5.00 110 70 -19.44323  
4.75 110 70 -25.40070  
4.50 110 70 -32.93423  
4.25 110 70 -41.67398  
4.00 110 70 -49.75763  
3.75 110 70 -51.81359  
3.50 110 70 -34.94144  
3.25 110 70 28.98784  
3.00 110 70 197.88433  
2.75 110 70 587.53506  
2.50 110 70 1428.69080  
2.25 110 70 3188.12143  
100.00 110 80 -0.00000  
50.00 110 80 -0.00000  
40.00 110 80 -0.00000  
30.00 110 80 -0.00002  
25.00 110 80 -0.00008  
20.00 110 80 -0.00034  
18.00 110 80 -0.00071  
16.00 110 80 -0.00163  
14.00 110 80 -0.00429  
13.00 110 80 -0.00747  
12.00 110 80 -0.01402  
11.00 110 80 -0.02934  
10.50 110 80 -0.04474  
10.00 110 80 -0.07093

9.75 110 80 -0.09060  
 9.50 110 80 -0.11675  
 9.25 110 80 -0.15166  
 9.00 110 80 -0.19838  
 8.75 110 80 -0.26101  
 8.50 110 80 -0.34493  
 8.25 110 80 -0.45725  
 8.00 110 80 -0.60720  
 7.75 110 80 -0.80671  
 7.50 110 80 -1.07101  
 7.25 110 80 -1.41947  
 7.00 110 80 -1.87665  
 6.75 110 80 -2.47367  
 6.50 110 80 -3.25043  
 6.25 110 80 -4.25892  
 6.00 110 80 -5.56854  
 5.75 110 80 -7.27439  
 5.50 110 80 -9.50931  
 5.25 110 80 -12.45949  
 5.00 110 80 -16.37914  
 4.75 110 80 -21.59003  
 4.50 110 80 -28.42783  
 4.25 110 80 -37.04590  
 4.00 110 80 -46.87942  
 3.75 110 80 -55.35080  
 3.50 110 80 -54.93944  
 3.25 110 80 -26.77957  
 3.00 110 80 73.11882  
 2.75 110 80 343.44976  
 2.50 110 80 1000.90868  
 2.25 110 80 2512.27008  
 100.00 110 90 -0.00000  
 50.00 110 90 -0.00000  
 40.00 110 90 -0.00000  
 30.00 110 90 -0.00002  
 25.00 110 90 -0.00007  
 20.00 110 90 -0.00034  
 18.00 110 90 -0.00070  
 16.00 110 90 -0.00160  
 14.00 110 90 -0.00418  
 13.00 110 90 -0.00722  
 12.00 110 90 -0.01333  
 11.00 110 90 -0.02702  
 10.50 110 90 -0.04028  
 10.00 110 90 -0.06227  
 9.75 110 90 -0.07850  
 9.50 110 90 -0.09987  
 9.25 110 90 -0.12817  
 9.00 110 90 -0.16582  
 8.75 110 90 -0.21609  
 8.50 110 90 -0.28336  
 8.25 110 90 -0.37345  
 8.00 110 90 -0.49411  
 7.75 110 90 -0.65554  
 7.50 110 90 -0.87111  
 7.25 110 90 -1.15825  
 7.00 110 90 -1.53963  
 6.75 110 90 -2.04476  
 6.50 110 90 -2.71219  
 6.25 110 90 -3.59271  
 6.00 110 90 -4.75411  
 5.75 110 90 -6.28826  
 5.50 110 90 -8.32111  
 5.25 110 90 -11.02592  
 5.00 110 90 -14.63711  
 4.75 110 90 -19.45529  
 4.50 110 90 -25.81605  
 4.25 110 90 -33.95283  
 4.00 110 90 -43.58833  
 3.75 110 90 -52.87435  
 3.50 110 90 -55.82451  
 3.25 110 90 -36.32744  
 3.00 110 90 45.52738  
 2.75 110 90 284.25160  
 2.50 110 90 897.03586  
 2.25 110 90 2368.11299  
 100.00 110 100 -0.00000  
 50.00 110 100 -0.00000  
 40.00 110 100 -0.00000  
 30.00 110 100 -0.00002  
 25.00 110 100 -0.00008  
 20.00 110 100 -0.00036  
 18.00 110 100 -0.00075  
 16.00 110 100 -0.00171  
 14.00 110 100 -0.00441  
 13.00 110 100 -0.00756  
 12.00 110 100 -0.01376  
 11.00 110 100 -0.02713  
 10.50 110 100 -0.03966  
 10.00 110 100 -0.05987  
 9.75 110 100 -0.07452  
 9.50 110 100 -0.09359  
 9.25 110 100 -0.11859  
 9.00 110 100 -0.15159  
 8.75 110 100 -0.19538  
 8.50 110 100 -0.25378  
 8.25 110 100 -0.33192  
 8.00 110 100 -0.43679  
 7.75 110 100 -0.57777  
 7.50 110 100 -0.76750  
 7.25 110 100 -1.02289  
 7.00 110 100 -1.36663  
 6.75 110 100 -1.82907

6.50 110 100 -2.45091  
6.25 110 100 -3.28679  
6.00 110 100 -4.41040  
5.75 110 100 -5.92133  
5.50 110 100 -7.95436  
5.25 110 100 -10.69051  
5.00 110 100 -14.36769  
4.75 110 100 -19.28198  
4.50 110 100 -25.75503  
4.25 110 100 -34.00432  
4.00 110 100 -43.76076  
3.75 110 100 -53.26047  
3.50 110 100 -56.72869  
3.25 110 100 -38.28550  
3.00 110 100 42.54743  
2.75 110 100 284.76158  
2.50 110 100 923.31459  
2.25 110 100 2497.89921  
100.00 110 110 -0.00000  
50.00 110 110 -0.00000  
40.00 110 110 -0.00000  
30.00 110 110 -0.00003  
25.00 110 110 -0.00010  
20.00 110 110 -0.00043  
18.00 110 110 -0.00088  
16.00 110 110 -0.00198  
14.00 110 110 -0.00507  
13.00 110 110 -0.00863  
12.00 110 110 -0.01553  
11.00 110 110 -0.03005  
10.50 110 110 -0.04332  
10.00 110 110 -0.06430  
9.75 110 110 -0.07929  
9.50 110 110 -0.09861  
9.25 110 110 -0.12375  
9.00 110 110 -0.15672  
8.75 110 110 -0.20028  
8.50 110 110 -0.25825  
8.25 110 110 -0.33591  
8.00 110 110 -0.44049  
7.75 110 110 -0.58201  
7.50 110 110 -0.77425  
7.25 110 110 -1.03616  
7.00 110 110 -1.39375  
6.75 110 110 -1.88266  
6.50 110 110 -2.55155  
6.25 110 110 -3.46659  
6.00 110 110 -4.71736  
5.75 110 110 -6.42425  
5.50 110 110 -8.74709  
5.25 110 110 -11.89403  
5.00 110 110 -16.12627  
4.75 110 110 -21.74811  
4.50 110 110 -29.05441  
4.25 110 110 -38.16716  
4.00 110 110 -48.59349  
3.75 110 110 -58.09642  
3.50 110 110 -59.87836  
3.25 110 110 -35.63729  
3.00 110 110 61.41627  
2.75 110 110 347.58987  
2.50 110 110 1105.43135  
2.25 110 110 3000.96992  
100.00 110 120 -0.00000  
50.00 110 120 -0.00000  
40.00 110 120 -0.00001  
30.00 110 120 -0.00004  
25.00 110 120 -0.00012  
20.00 110 120 -0.00054  
18.00 110 120 -0.00110  
16.00 110 120 -0.00246  
14.00 110 120 -0.00625  
13.00 110 120 -0.01061  
12.00 110 120 -0.01903  
11.00 110 120 -0.03659  
10.50 110 120 -0.05250  
10.00 110 120 -0.07749  
9.75 110 120 -0.09529  
9.50 110 120 -0.11821  
9.25 110 120 -0.14804  
9.00 110 120 -0.18723  
8.75 110 120 -0.23922  
8.50 110 120 -0.30881  
8.25 110 120 -0.40276  
8.00 110 120 -0.53053  
7.75 110 120 -0.70538  
7.50 110 120 -0.94586  
7.25 110 120 -1.27779  
7.00 110 120 -1.73691  
6.75 110 120 -2.37235  
6.50 110 120 -3.25107  
6.25 110 120 -4.46329  
6.00 110 120 -6.12885  
5.75 110 120 -8.40390  
5.50 110 120 -11.48587  
5.25 110 120 -15.61251  
5.00 110 120 -21.04412  
4.75 110 120 -28.00595  
4.50 110 120 -36.53963  
4.25 110 120 -46.15282  
4.00 110 120 -55.02162  
3.75 110 120 -58.18670  
3.50 110 120 -43.42658

3.25 110 120 18.38478  
3.00 110 120 196.28680  
2.75 110 120 654.78423  
2.50 110 120 1787.15473  
2.25 110 120 4524.79535  
100.00 110 130 -0.00000  
50.00 110 130 -0.00000  
40.00 110 130 -0.00001  
30.00 110 130 -0.00005  
25.00 110 130 -0.00016  
20.00 110 130 -0.00069  
18.00 110 130 -0.00141  
16.00 110 130 -0.00315  
14.00 110 130 -0.00804  
13.00 110 130 -0.01371  
12.00 110 130 -0.02470  
11.00 110 130 -0.04790  
10.50 110 130 -0.06917  
10.00 110 130 -0.10302  
9.75 110 130 -0.12745  
9.50 110 130 -0.15926  
9.25 110 130 -0.20118  
9.00 110 130 -0.25703  
8.75 110 130 -0.33226  
8.50 110 130 -0.43456  
8.25 110 130 -0.57487  
8.00 110 130 -0.76860  
7.75 110 130 -1.03740  
7.50 110 130 -1.41144  
7.25 110 130 -1.93232  
7.00 110 130 -2.65674  
6.75 110 130 -3.66074  
6.50 110 130 -5.04446  
6.25 110 130 -6.93638  
6.00 110 130 -9.49504  
5.75 110 130 -12.90361  
5.50 110 130 -17.34650  
5.25 110 130 -22.94590  
5.00 110 130 -29.61307  
4.75 110 130 -36.72873  
4.50 110 130 -42.49649  
4.25 110 130 -42.69465  
4.00 110 130 -28.33995  
3.75 110 130 18.65687  
3.50 110 130 133.77964  
3.25 110 130 386.61888  
3.00 110 130 916.89629  
2.75 110 130 2016.78697  
2.50 110 130 4326.86820  
2.25 110 130 7975.03038  
100.00 110 140 -0.00000  
50.00 110 140 -0.00000  
40.00 110 140 -0.00001  
30.00 110 140 -0.00006  
25.00 110 140 -0.00020  
20.00 110 140 -0.00088  
18.00 110 140 -0.00179  
16.00 110 140 -0.00404  
14.00 110 140 -0.01044  
13.00 110 140 -0.01796  
12.00 110 140 -0.03281  
11.00 110 140 -0.06504  
10.50 110 140 -0.09552  
10.00 110 140 -0.14560  
9.75 110 140 -0.18271  
9.50 110 140 -0.23204  
9.25 110 140 -0.29845  
9.00 110 140 -0.38887  
8.75 110 140 -0.51320  
8.50 110 140 -0.68557  
8.25 110 140 -0.92594  
8.00 110 140 -1.26230  
7.75 110 140 -1.73340  
7.50 110 140 -2.39207  
7.25 110 140 -3.30886  
7.00 110 140 -4.57564  
6.75 110 140 -6.30759  
6.50 110 140 -8.64065  
6.25 110 140 -11.71707  
6.00 110 140 -15.64306  
5.75 110 140 -20.38343  
5.50 110 140 -25.52121  
5.25 110 140 -29.74398  
5.00 110 140 -29.81503  
4.75 110 140 -18.65725  
4.50 110 140 17.92546  
4.25 110 140 106.33919  
4.00 110 140 292.36996  
3.75 110 140 650.81928  
3.50 110 140 1300.05125  
3.25 110 140 2430.71521  
3.00 110 140 4371.27724  
2.75 110 140 7258.30870  
2.50 110 140 8886.26072  
2.25 110 140 9494.66154  
100.00 110 150 -0.00000  
50.00 110 150 -0.00000  
40.00 110 150 -0.00001  
30.00 110 150 -0.00007  
25.00 110 150 -0.00024  
20.00 110 150 -0.00107  
18.00 110 150 -0.00221  
16.00 110 150 -0.00504

14.00 110 150 -0.01325  
13.00 110 150 -0.02308  
12.00 110 150 -0.04296  
11.00 110 150 -0.08788  
10.50 110 150 -0.13221  
10.00 110 150 -0.20799  
9.75 110 150 -0.26595  
9.50 110 150 -0.34479  
9.25 110 150 -0.45327  
9.00 110 150 -0.60402  
8.75 110 150 -0.81509  
8.50 110 150 -1.11208  
8.25 110 150 -1.53083  
8.00 110 150 -2.12065  
7.75 110 150 -2.94802  
7.50 110 150 -4.09984  
7.25 110 150 -5.68489  
7.00 110 150 -7.82927  
6.75 110 150 -10.65646  
6.50 110 150 -14.22953  
6.25 110 150 -18.40289  
6.00 110 150 -22.46490  
5.75 110 150 -24.31639  
5.50 110 150 -18.67538  
5.25 110 150 6.61196  
5.00 110 150 77.56029  
4.75 110 150 245.85775  
4.50 110 150 605.57635  
4.25 110 150 1309.96161  
4.00 110 150 2575.21207  
3.75 110 150 4656.60093  
3.50 110 150 7304.85935  
3.25 110 150 8703.05702  
3.00 110 150 9290.44476  
2.75 110 150 9590.39375  
2.50 110 150 9761.59848  
2.25 110 150 9857.58616  
100.00 110 160 -0.00000  
50.00 110 160 -0.00000  
40.00 110 160 -0.00001  
30.00 110 160 -0.00009  
25.00 110 160 -0.00028  
20.00 110 160 -0.00125  
18.00 110 160 -0.00260  
16.00 110 160 -0.00599  
14.00 110 160 -0.01602  
13.00 110 160 -0.02826  
12.00 110 160 -0.05363  
11.00 110 160 -0.11335  
10.50 110 160 -0.17481  
10.00 110 160 -0.28386  
9.75 110 160 -0.36958  
9.50 110 160 -0.48832  
9.25 110 160 -0.65447  
9.00 110 160 -0.88872  
8.75 110 160 -1.22053  
8.50 110 160 -1.69128  
8.25 110 160 -2.35797  
8.00 110 160 -3.29709  
7.75 110 160 -4.60757  
7.50 110 160 -6.40954  
7.25 110 160 -8.83158  
7.00 110 160 -11.96723  
6.75 110 160 -15.75318  
6.50 110 160 -19.65049  
6.25 110 160 -21.84279  
6.00 110 160 -17.28499  
5.75 110 160 6.86419  
5.50 110 160 81.41216  
5.25 110 160 276.25699  
5.00 110 160 739.88510  
4.75 110 160 1760.74093  
4.50 110 160 3827.82311  
4.25 110 160 7177.01486  
4.00 110 160 8867.88708  
3.75 110 160 9398.46482  
3.50 110 160 9642.79723  
3.25 110 160 9780.42026  
3.00 110 160 9862.14031  
2.75 110 160 9912.30496  
2.50 110 160 9943.75276  
2.25 110 160 9963.73283  
100.00 110 170 -0.00000  
50.00 110 170 -0.00000  
40.00 110 170 -0.00001  
30.00 110 170 -0.00009  
25.00 110 170 -0.00031  
20.00 110 170 -0.00138  
18.00 110 170 -0.00288  
16.00 110 170 -0.00669  
14.00 110 170 -0.01809  
13.00 110 170 -0.03223  
12.00 110 170 -0.06205  
11.00 110 170 -0.13444  
10.50 110 170 -0.21125  
10.00 110 170 -0.35101  
9.75 110 170 -0.46282  
9.50 110 170 -0.61944  
9.25 110 170 -0.84072  
9.00 110 170 -1.15517  
8.75 110 170 -1.60313  
8.50 110 170 -2.24073  
8.25 110 170 -3.14406

8.00 110 170 -4.41254  
7.75 110 170 -6.16830  
7.50 110 170 -8.54355  
7.25 110 170 -11.63487  
7.00 110 170 -15.36971  
6.75 110 170 -19.14250  
6.50 110 170 -20.85409  
6.25 110 170 -14.44018  
6.00 110 170 16.31452  
5.75 110 170 112.70940  
5.50 110 170 375.38656  
5.25 110 170 1036.86840  
5.00 110 170 2593.78615  
4.75 110 170 5941.45728  
4.50 110 170 8711.49444  
4.25 110 170 9434.98026  
4.00 110 170 9713.40548  
3.75 110 170 9847.20204  
3.50 110 170 9916.37608  
3.25 110 170 9953.58292  
3.00 110 170 9974.03430  
2.75 110 170 9985.41186  
2.50 110 170 9991.78416  
2.25 110 170 9995.36665  
100.00 110 180 -0.00000  
50.00 110 180 -0.00000  
40.00 110 180 -0.00002  
30.00 110 180 -0.00010  
25.00 110 180 -0.00032  
20.00 110 180 -0.00143  
18.00 110 180 -0.00298  
16.00 110 180 -0.00694  
14.00 110 180 -0.01887  
13.00 110 180 -0.03373  
12.00 110 180 -0.06528  
11.00 110 180 -0.14278  
10.50 110 180 -0.22589  
10.00 110 180 -0.37850  
9.75 110 180 -0.50131  
9.50 110 180 -0.67397  
9.25 110 180 -0.91867  
9.00 110 180 -1.26723  
8.75 110 180 -1.76460  
8.50 110 180 -2.47301  
8.25 110 180 -3.47627  
8.00 110 180 -4.88244  
7.75 110 180 -6.82073  
7.50 110 180 -9.42105  
7.25 110 180 -12.74621  
7.00 110 180 -16.59703  
6.75 110 180 -19.97982  
6.50 110 180 -19.68929  
6.25 110 180 -6.61997  
6.00 110 180 43.58607  
5.75 110 180 193.43309  
5.50 110 180 596.76760  
5.25 110 180 1611.87193  
5.00 110 180 4000.39471  
4.75 110 180 7900.61029  
4.50 110 180 9253.37450  
4.25 110 180 9651.45982  
4.00 110 180 9825.25986  
3.75 110 180 9909.24976  
3.50 110 180 9952.01248  
3.25 110 180 9974.38445  
3.00 110 180 9986.25794  
2.75 110 180 9992.60801  
2.50 110 180 9996.01806  
2.25 110 180 9997.85334  
100.00 120 0 -0.00000  
50.00 120 0 -0.00000  
40.00 120 0 -0.00001  
30.00 120 0 -0.00006  
25.00 120 0 -0.00019  
20.00 120 0 -0.00080  
18.00 120 0 -0.00163  
16.00 120 0 -0.00374  
14.00 120 0 -0.01036  
13.00 120 0 -0.01937  
12.00 120 0 -0.04112  
11.00 120 0 -0.10290  
10.50 120 0 -0.17313  
10.00 120 0 -0.30114  
9.75 120 0 -0.40096  
9.50 120 0 -0.53638  
9.25 120 0 -0.72011  
9.00 120 0 -0.96931  
8.75 120 0 -1.30728  
8.50 120 0 -1.76604  
8.25 120 0 -2.39025  
8.00 120 0 -3.24338  
7.75 120 0 -4.41703  
7.50 120 0 -6.04342  
7.25 120 0 -8.30692  
7.00 120 0 -11.43608  
6.75 120 0 -15.61641  
6.50 120 0 -20.65429  
6.25 120 0 -24.94782  
6.00 120 0 -22.66597  
5.75 120 0 3.45008  
5.50 120 0 99.48087  
5.25 120 0 380.41160  
5.00 120 0 1118.53187

4.75 120 0 2931.14102  
 4.50 120 0 6911.09834  
 4.25 120 0 9182.15976  
 4.00 120 0 9719.58977  
 3.75 120 0 9891.57014  
 3.50 120 0 9956.13496  
 3.25 120 0 9981.93370  
 3.00 120 0 9992.50458  
 2.75 120 0 9996.88086  
 2.50 120 0 9998.70037  
 2.25 120 0 9999.45821  
 100.00 120 10 -0.00000  
 50.00 120 10 -0.00000  
 40.00 120 10 -0.00001  
 30.00 120 10 -0.00006  
 25.00 120 10 -0.00018  
 20.00 120 10 -0.00078  
 18.00 120 10 -0.00159  
 16.00 120 10 -0.00367  
 14.00 120 10 -0.01012  
 13.00 120 10 -0.01888  
 12.00 120 10 -0.03998  
 11.00 120 10 -0.09973  
 10.50 120 10 -0.16755  
 10.00 120 10 -0.29094  
 9.75 120 10 -0.38700  
 9.50 120 10 -0.51714  
 9.25 120 10 -0.69336  
 9.00 120 10 -0.93174  
 8.75 120 10 -1.25395  
 8.50 120 10 -1.68936  
 8.25 120 10 -2.27838  
 8.00 120 10 -3.07758  
 7.75 120 10 -4.16769  
 7.50 120 10 -5.66477  
 7.25 120 10 -7.73274  
 7.00 120 10 -10.58612  
 6.75 120 10 -14.44497  
 6.50 120 10 -19.33324  
 6.25 120 10 -24.43565  
 6.00 120 10 -26.32010  
 5.75 120 10 -14.43532  
 5.50 120 10 39.55010  
 5.25 120 10 205.49449  
 5.00 120 10 644.41481  
 4.75 120 10 1704.80321  
 4.50 120 10 4092.97819  
 4.25 120 10 7916.72442  
 4.00 120 10 9309.73609  
 3.75 120 10 9719.19139  
 3.50 120 10 9875.57050  
 3.25 120 10 9942.78515  
 3.00 120 10 9973.24785  
 2.75 120 10 9987.39407  
 2.50 120 10 9994.03830  
 2.25 120 10 9997.17570  
 100.00 120 20 -0.00000  
 50.00 120 20 -0.00000  
 40.00 120 20 -0.00001  
 30.00 120 20 -0.00006  
 25.00 120 20 -0.00017  
 20.00 120 20 -0.00074  
 18.00 120 20 -0.00151  
 16.00 120 20 -0.00345  
 14.00 120 20 -0.00946  
 13.00 120 20 -0.01754  
 12.00 120 20 -0.03686  
 11.00 120 20 -0.09121  
 10.50 120 20 -0.15260  
 10.00 120 20 -0.26388  
 9.75 120 20 -0.35023  
 9.50 120 20 -0.46682  
 9.25 120 20 -0.62405  
 9.00 120 20 -0.83561  
 8.75 120 20 -1.11952  
 8.50 120 20 -1.49952  
 8.25 120 20 -2.00709  
 8.00 120 20 -2.68460  
 7.75 120 20 -3.59015  
 7.50 120 20 -4.80521  
 7.25 120 20 -6.44532  
 7.00 120 20 -8.67224  
 6.75 120 20 -11.69786  
 6.50 120 20 -15.74834  
 6.25 120 20 -20.90282  
 6.00 120 20 -26.59849  
 5.75 120 20 -30.33550  
 5.50 120 20 -24.61836  
 5.25 120 20 9.69006  
 5.00 120 20 116.69864  
 4.75 120 20 390.00323  
 4.50 120 20 1013.42452  
 4.25 120 20 2321.03122  
 4.00 120 20 4875.69937  
 3.75 120 20 8064.70451  
 3.50 120 20 9227.49749  
 3.25 120 20 9632.63251  
 3.00 120 20 9812.86313  
 2.75 120 20 9901.22000  
 2.50 120 20 9946.88663  
 2.25 120 20 9971.15919  
 100.00 120 30 -0.00000  
 50.00 120 30 -0.00000

40.00 120 30 -0.00001  
30.00 120 30 -0.00005  
25.00 120 30 -0.00016  
20.00 120 30 -0.00067  
18.00 120 30 -0.00137  
16.00 120 30 -0.00314  
14.00 120 30 -0.00852  
13.00 120 30 -0.01567  
12.00 120 30 -0.03256  
11.00 120 30 -0.07953  
10.50 120 30 -0.13229  
10.00 120 30 -0.22755  
9.75 120 30 -0.30124  
9.50 120 30 -0.40050  
9.25 120 30 -0.53393  
9.00 120 30 -0.71274  
8.75 120 30 -0.95137  
8.50 120 30 -1.26837  
8.25 120 30 -1.68741  
8.00 120 30 -2.23887  
7.75 120 30 -2.96219  
7.50 120 30 -3.90969  
7.25 120 30 -5.15281  
7.00 120 30 -6.79157  
6.75 120 30 -8.96709  
6.50 120 30 -11.87283  
6.25 120 30 -15.74792  
6.00 120 30 -20.80683  
5.75 120 30 -26.99473  
5.50 120 30 -33.32490  
5.25 120 30 -36.29949  
5.00 120 30 -26.45364  
4.75 120 30 18.73228  
4.50 120 30 148.62984  
4.25 120 30 465.15584  
4.00 120 30 1168.47584  
3.75 120 30 2632.57900  
3.50 120 30 5506.67952  
3.25 120 30 8407.77527  
3.00 120 30 9328.24647  
2.75 120 30 9647.92445  
2.50 120 30 9797.23484  
2.25 120 30 9880.21730  
100.00 120 40 -0.00000  
50.00 120 40 -0.00000  
40.00 120 40 -0.00001  
30.00 120 40 -0.00004  
25.00 120 40 -0.00014  
20.00 120 40 -0.00060  
18.00 120 40 -0.00122  
16.00 120 40 -0.00278  
14.00 120 40 -0.00747  
13.00 120 40 -0.01361  
12.00 120 40 -0.02788  
11.00 120 40 -0.06697  
10.50 120 40 -0.11052  
10.00 120 40 -0.18887  
9.75 120 40 -0.24937  
9.50 120 40 -0.33077  
9.25 120 40 -0.44009  
9.00 120 40 -0.58641  
8.75 120 40 -0.78138  
8.50 120 40 -1.03975  
8.25 120 40 -1.38003  
8.00 120 40 -1.82526  
7.75 120 40 -2.40418  
7.50 120 40 -3.15297  
7.25 120 40 -4.11825  
7.00 120 40 -5.36214  
6.75 120 40 -6.97039  
6.50 120 40 -9.06383  
6.25 120 40 -11.81067  
6.00 120 40 -15.42823  
5.75 120 40 -20.14192  
5.50 120 40 -26.02068  
5.25 120 40 -32.50710  
5.00 120 40 -37.25547  
4.75 120 40 -33.49876  
4.50 120 40 -4.45502  
4.25 120 40 87.87642  
4.00 120 40 323.65625  
3.75 120 40 860.48062  
3.50 120 40 1982.23218  
3.25 120 40 4138.26088  
3.00 120 40 7350.60162  
2.75 120 40 8882.42378  
2.50 120 40 9387.85370  
2.25 120 40 9599.42671  
100.00 120 50 -0.00000  
50.00 120 50 -0.00000  
40.00 120 50 -0.00001  
30.00 120 50 -0.00004  
25.00 120 50 -0.00012  
20.00 120 50 -0.00052  
18.00 120 50 -0.00106  
16.00 120 50 -0.00242  
14.00 120 50 -0.00647  
13.00 120 50 -0.01166  
12.00 120 50 -0.02349  
11.00 120 50 -0.05516  
10.50 120 50 -0.09006  
10.00 120 50 -0.15252  
9.75 120 50 -0.20066

9.50 120 50 -0.26541  
 9.25 120 50 -0.35239  
 9.00 120 50 -0.46891  
 8.75 120 50 -0.62436  
 8.50 120 50 -0.83067  
 8.25 120 50 -1.10279  
 8.00 120 50 -1.45923  
 7.75 120 50 -1.92280  
 7.50 120 50 -2.52151  
 7.25 120 50 -3.29014  
 7.00 120 50 -4.27297  
 6.75 120 50 -5.52823  
 6.50 120 50 -7.13538  
 6.25 120 50 -9.20501  
 6.00 120 50 -11.88854  
 5.75 120 50 -15.37655  
 5.50 120 50 -19.85473  
 5.25 120 50 -25.34291  
 5.00 120 50 -31.25175  
 4.75 120 50 -35.31431  
 4.50 120 50 -31.22329  
 4.25 120 50 -3.76117  
 4.00 120 50 80.53383  
 3.75 120 50 289.65714  
 3.50 120 50 750.65916  
 3.25 120 50 1677.05681  
 3.00 120 50 3377.20682  
 2.75 120 50 6148.89417  
 2.50 120 50 8308.08341  
 2.25 120 50 9115.53863  
 100.00 120 60 -0.00000  
 50.00 120 60 -0.00000  
 40.00 120 60 -0.00001  
 30.00 120 60 -0.00003  
 25.00 120 60 -0.00010  
 20.00 120 60 -0.00045  
 18.00 120 60 -0.00092  
 16.00 120 60 -0.00210  
 14.00 120 60 -0.00560  
 13.00 120 60 -0.01000  
 12.00 120 60 -0.01976  
 11.00 120 60 -0.04512  
 10.50 120 60 -0.07258  
 10.00 120 60 -0.12132  
 9.75 120 60 -0.15875  
 9.50 120 60 -0.20906  
 9.25 120 60 -0.27665  
 9.00 120 60 -0.36730  
 8.75 120 60 -0.48851  
 8.50 120 60 -0.64989  
 8.25 120 60 -0.86360  
 8.00 120 60 -1.14484  
 7.75 120 60 -1.51240  
 7.50 120 60 -1.98942  
 7.25 120 60 -2.60437  
 7.00 120 60 -3.39271  
 6.75 120 60 -4.39969  
 6.50 120 60 -5.68495  
 6.25 120 60 -7.32968  
 6.00 120 60 -9.44603  
 5.75 120 60 -12.18570  
 5.50 120 60 -15.73658  
 5.25 120 60 -20.27790  
 5.00 120 60 -25.82518  
 4.75 120 60 -31.81650  
 4.50 120 60 -36.14126  
 4.25 120 60 -33.04740  
 4.00 120 60 -8.94684  
 3.75 120 60 65.38244  
 3.50 120 60 248.01309  
 3.25 120 60 645.57976  
 3.00 120 60 1437.61601  
 2.75 120 60 2899.73073  
 2.50 120 60 5424.12470  
 2.25 120 60 8074.18138  
 100.00 120 70 -0.00000  
 50.00 120 70 -0.00000  
 40.00 120 70 -0.00000  
 30.00 120 70 -0.00003  
 25.00 120 70 -0.00009  
 20.00 120 70 -0.00039  
 18.00 120 70 -0.00081  
 16.00 120 70 -0.00185  
 14.00 120 70 -0.00492  
 13.00 120 70 -0.00872  
 12.00 120 70 -0.01689  
 11.00 120 70 -0.03734  
 10.50 120 70 -0.05892  
 10.00 120 70 -0.09673  
 9.75 120 70 -0.12558  
 9.50 120 70 -0.16424  
 9.25 120 70 -0.21611  
 9.00 120 70 -0.28571  
 8.75 120 70 -0.37895  
 8.50 120 70 -0.50348  
 8.25 120 70 -0.66914  
 8.00 120 70 -0.88843  
 7.75 120 70 -1.17704  
 7.50 120 70 -1.55452  
 7.25 120 70 -2.04519  
 7.00 120 70 -2.67938  
 6.75 120 70 -3.49544  
 6.50 120 70 -4.54306

6.25 120 70 -5.88850  
6.00 120 70 -7.62252  
5.75 120 70 -9.87071  
5.50 120 70 -12.80288  
5.25 120 70 -16.63076  
5.00 120 70 -21.56456  
4.75 120 70 -27.66086  
4.50 120 70 -34.41501  
4.25 120 70 -39.80072  
4.00 120 70 -38.18419  
3.75 120 70 -16.07619  
3.50 120 70 56.03808  
3.25 120 70 238.58975  
3.00 120 70 648.84892  
2.75 120 70 1505.00059  
2.50 120 70 3202.15380  
2.25 120 70 6358.45410  
100.00 120 80 -0.00000  
50.00 120 80 -0.00000  
40.00 120 80 -0.00000  
30.00 120 80 -0.00002  
25.00 120 80 -0.00008  
20.00 120 80 -0.00035  
18.00 120 80 -0.00074  
16.00 120 80 -0.00169  
14.00 120 80 -0.00449  
13.00 120 80 -0.00788  
12.00 120 80 -0.01497  
11.00 120 80 -0.03196  
10.50 120 80 -0.04932  
10.00 120 80 -0.07915  
9.75 120 80 -0.10166  
9.50 120 80 -0.13166  
9.25 120 80 -0.17178  
9.00 120 80 -0.22551  
8.75 120 80 -0.29748  
8.50 120 80 -0.39381  
8.25 120 80 -0.52246  
8.00 120 80 -0.69372  
7.75 120 80 -0.92079  
7.50 120 80 -1.22047  
7.25 120 80 -1.61404  
7.00 120 80 -2.12850  
6.75 120 80 -2.79831  
6.50 120 80 -3.66813  
6.25 120 80 -4.79699  
6.00 120 80 -6.26484  
5.75 120 80 -8.18174  
5.50 120 80 -10.69928  
5.25 120 80 -14.01951  
5.00 120 80 -18.38718  
4.75 120 80 -24.02759  
4.50 120 80 -30.94191  
4.25 120 80 -38.36575  
4.00 120 80 -43.48479  
3.75 120 80 -38.59154  
3.50 120 80 -5.09825  
3.25 120 80 98.60941  
3.00 120 80 361.18199  
2.75 120 80 964.99856  
2.50 120 80 2275.45683  
2.25 120 80 5004.26096  
100.00 120 90 -0.00000  
50.00 120 90 -0.00000  
40.00 120 90 -0.00000  
30.00 120 90 -0.00002  
25.00 120 90 -0.00008  
20.00 120 90 -0.00034  
18.00 120 90 -0.00071  
16.00 120 90 -0.00164  
14.00 120 90 -0.00433  
13.00 120 90 -0.00754  
12.00 120 90 -0.01406  
11.00 120 90 -0.02900  
10.50 120 90 -0.04371  
10.00 120 90 -0.06837  
9.75 120 90 -0.08669  
9.50 120 90 -0.11091  
9.25 120 90 -0.14307  
9.00 120 90 -0.18595  
8.75 120 90 -0.24325  
8.50 120 90 -0.31993  
8.25 120 90 -0.42256  
8.00 120 90 -0.55982  
7.75 120 90 -0.74305  
7.50 120 90 -0.98709  
7.25 120 90 -1.31122  
7.00 120 90 -1.74049  
6.75 120 90 -2.30761  
6.50 120 90 -3.05556  
6.25 120 90 -4.04155  
6.00 120 90 -5.34276  
5.75 120 90 -7.06448  
5.50 120 90 -9.35053  
5.25 120 90 -12.39333  
5.00 120 90 -16.43422  
4.75 120 90 -21.72797  
4.50 120 90 -28.40671  
4.25 120 90 -36.09389  
4.00 120 90 -42.94171  
3.75 120 90 -43.40175  
3.50 120 90 -23.30808  
3.25 120 90 50.62217

3.00 120 90 252.79073  
 2.75 120 90 744.39830  
 2.50 120 90 1867.23510  
 2.25 120 90 4329.47340  
 100.00 120 100 -0.00000  
 50.00 120 100 -0.00000  
 40.00 120 100 -0.00000  
 30.00 120 100 -0.00002  
 25.00 120 100 -0.00008  
 20.00 120 100 -0.00037  
 18.00 120 100 -0.00076  
 16.00 120 100 -0.00173  
 14.00 120 100 -0.00451  
 13.00 120 100 -0.00778  
 12.00 120 100 -0.01428  
 11.00 120 100 -0.02855  
 10.50 120 100 -0.04211  
 10.00 120 100 -0.06423  
 9.75 120 100 -0.08038  
 9.50 120 100 -0.10149  
 9.25 120 100 -0.12926  
 9.00 120 100 -0.16603  
 8.75 120 100 -0.21494  
 8.50 120 100 -0.28025  
 8.25 120 100 -0.36772  
 8.00 120 100 -0.48509  
 7.75 120 100 -0.64276  
 7.50 120 100 -0.85466  
 7.25 120 100 -1.13946  
 7.00 120 100 -1.52209  
 6.75 120 100 -2.03598  
 6.50 120 100 -2.72607  
 6.25 120 100 -3.65303  
 6.00 120 100 -4.89912  
 5.75 120 100 -6.57610  
 5.50 120 100 -8.83481  
 5.25 120 100 -11.87445  
 5.00 120 100 -15.94377  
 4.75 120 100 -21.31333  
 4.50 120 100 -28.16657  
 4.25 120 100 -36.28743  
 4.00 120 100 -44.26974  
 3.75 120 100 -47.64538  
 3.50 120 100 -34.62291  
 3.25 120 100 23.41555  
 3.00 120 100 192.97527  
 2.75 120 100 625.22851  
 2.50 120 100 1659.74120  
 2.25 120 100 4048.62890  
 100.00 120 110 -0.00000  
 50.00 120 110 -0.00000  
 40.00 120 110 -0.00000  
 30.00 120 110 -0.00003  
 25.00 120 110 -0.00010  
 20.00 120 110 -0.00043  
 18.00 120 110 -0.00088  
 16.00 120 110 -0.00199  
 14.00 120 110 -0.00512  
 13.00 120 110 -0.00876  
 12.00 120 110 -0.01586  
 11.00 120 110 -0.03100  
 10.50 120 110 -0.04499  
 10.00 120 110 -0.06729  
 9.75 120 110 -0.08332  
 9.50 120 110 -0.10406  
 9.25 120 110 -0.13114  
 9.00 120 110 -0.16676  
 8.75 120 110 -0.21395  
 8.50 120 110 -0.27687  
 8.25 120 110 -0.36126  
 8.00 120 110 -0.47500  
 7.75 120 110 -0.62892  
 7.50 120 110 -0.83793  
 7.25 120 110 -1.12248  
 7.00 120 110 -1.51065  
 6.75 120 110 -2.04087  
 6.50 120 110 -2.76571  
 6.25 120 110 -3.75690  
 6.00 120 110 -5.11182  
 5.75 120 110 -6.96175  
 5.50 120 110 -9.48098  
 5.25 120 110 -12.89447  
 5.00 120 110 -17.47645  
 4.75 120 110 -23.52089  
 4.50 120 110 -31.23784  
 4.25 120 110 -40.46862  
 4.00 120 110 -49.97451  
 3.75 120 110 -55.73760  
 3.50 120 110 -46.97319  
 3.25 120 110 3.22171  
 3.00 120 110 159.99916  
 2.75 120 110 579.64156  
 2.50 120 110 1635.60238  
 2.25 120 110 4209.94696  
 100.00 120 120 -0.00000  
 50.00 120 120 -0.00000  
 40.00 120 120 -0.00001  
 30.00 120 120 -0.00004  
 25.00 120 120 -0.00012  
 20.00 120 120 -0.00054  
 18.00 120 120 -0.00109  
 16.00 120 120 -0.00245  
 14.00 120 120 -0.00626

13.00 120 120 -0.01066  
12.00 120 120 -0.01920  
11.00 120 120 -0.03716  
10.50 120 120 -0.05354  
10.00 120 120 -0.07941  
9.75 120 120 -0.09790  
9.50 120 120 -0.12178  
9.25 120 120 -0.15292  
9.00 120 120 -0.19391  
8.75 120 120 -0.24838  
8.50 120 120 -0.32140  
8.25 120 120 -0.42006  
8.00 120 120 -0.55429  
7.75 120 120 -0.73803  
7.50 120 120 -0.99072  
7.25 120 120 -1.33940  
7.00 120 120 -1.82153  
6.75 120 120 -2.48865  
6.50 120 120 -3.41107  
6.25 120 120 -4.68379  
6.00 120 120 -6.43340  
5.75 120 120 -8.82543  
5.50 120 120 -12.06989  
5.25 120 120 -16.41987  
5.00 120 120 -22.15058  
4.75 120 120 -29.49099  
4.50 120 120 -38.44749  
4.25 120 120 -48.38866  
4.00 120 120 -57.10597  
3.75 120 120 -58.70834  
3.50 120 120 -38.83970  
3.25 120 120 36.49807  
3.00 120 120 247.94575  
2.75 120 120 789.62885  
2.50 120 120 2135.20383  
2.25 120 120 5435.82269  
100.00 120 130 -0.00000  
50.00 120 130 -0.00000  
40.00 120 130 -0.00001  
30.00 120 130 -0.00005  
25.00 120 130 -0.00016  
20.00 120 130 -0.00069  
18.00 120 130 -0.00140  
16.00 120 130 -0.00313  
14.00 120 130 -0.00802  
13.00 120 130 -0.01370  
12.00 120 130 -0.02475  
11.00 120 130 -0.04818  
10.50 120 130 -0.06973  
10.00 120 130 -0.10412  
9.75 120 130 -0.12898  
9.50 120 130 -0.16140  
9.25 120 130 -0.20415  
9.00 120 130 -0.26117  
8.75 120 130 -0.33801  
8.50 120 130 -0.44256  
8.25 120 130 -0.58599  
8.00 120 130 -0.78406  
7.75 120 130 -1.05890  
7.50 120 130 -1.44135  
7.25 120 130 -1.97394  
7.00 120 130 -2.71467  
6.75 120 130 -3.74149  
6.50 120 130 -5.15717  
6.25 120 130 -7.09397  
6.00 120 130 -9.71582  
5.75 120 130 -13.21341  
5.50 120 130 -17.78148  
5.25 120 130 -23.55554  
5.00 120 130 -30.46243  
4.75 120 130 -37.89721  
4.50 120 130 -44.06729  
4.25 120 130 -44.72403  
4.00 120 130 -30.78393  
3.75 120 130 16.11036  
3.50 120 130 132.13526  
3.25 120 130 388.84115  
3.00 120 130 932.15938  
2.75 120 130 2075.04477  
2.50 120 130 4526.74072  
2.25 120 130 8185.02260  
100.00 120 140 -0.00000  
50.00 120 140 -0.00000  
40.00 120 140 -0.00001  
30.00 120 140 -0.00006  
25.00 120 140 -0.00020  
20.00 120 140 -0.00087  
18.00 120 140 -0.00178  
16.00 120 140 -0.00402  
14.00 120 140 -0.01041  
13.00 120 140 -0.01792  
12.00 120 140 -0.03279  
11.00 120 140 -0.06513  
10.50 120 140 -0.09576  
10.00 120 140 -0.14613  
9.75 120 140 -0.18348  
9.50 120 140 -0.23316  
9.25 120 140 -0.30006  
9.00 120 140 -0.39116  
8.75 120 140 -0.51646  
8.50 120 140 -0.69018  
8.25 120 140 -0.93246  
8.00 120 140 -1.27152

7.75 120 140 -1.74641  
7.50 120 140 -2.41042  
7.25 120 140 -3.33476  
7.00 120 140 -4.61219  
6.75 120 140 -6.35924  
6.50 120 140 -8.71371  
6.25 120 140 -11.82059  
6.00 120 140 -15.78998  
5.75 120 140 -20.59221  
5.50 120 140 -25.81805  
5.25 120 140 -30.16568  
5.00 120 140 -30.41256  
4.75 120 140 -19.50039  
4.50 120 140 16.74115  
4.25 120 140 104.67812  
4.00 120 140 290.02400  
3.75 120 140 647.44337  
3.50 120 140 1295.10471  
3.25 120 140 2423.76374  
3.00 120 140 4364.34680  
2.75 120 140 7263.10968  
2.50 120 140 8896.96659  
2.25 120 140 9505.04501  
100.00 120 150 -0.00000  
50.00 120 150 -0.00000  
40.00 120 150 -0.00001  
30.00 120 150 -0.00007  
25.00 120 150 -0.00024  
20.00 120 150 -0.00107  
18.00 120 150 -0.00220  
16.00 120 150 -0.00503  
14.00 120 150 -0.01322  
13.00 120 150 -0.02304  
12.00 120 150 -0.04292  
11.00 120 150 -0.08788  
10.50 120 150 -0.13226  
10.00 120 150 -0.20818  
9.75 120 150 -0.26626  
9.50 120 150 -0.34527  
9.25 120 150 -0.45399  
9.00 120 150 -0.60510  
8.75 120 150 -0.81668  
8.50 120 150 -1.11440  
8.25 120 150 -1.53418  
8.00 120 150 -2.12548  
7.75 120 150 -2.95496  
7.50 120 150 -4.10979  
7.25 120 150 -5.69915  
7.00 120 150 -7.84967  
6.75 120 150 -10.68567  
6.50 120 150 -14.27135  
6.25 120 150 -18.46277  
6.00 120 150 -22.55061  
5.75 120 150 -24.43890  
5.50 120 150 -18.84985  
5.25 120 150 6.36503  
5.00 120 150 77.21365  
4.75 120 150 245.37463  
4.50 120 150 604.90103  
4.25 120 150 1308.98849  
4.00 120 150 2573.69809  
3.75 120 150 4653.96395  
3.50 120 150 7302.03534  
3.25 120 150 8701.53843  
3.00 120 150 9289.63332  
2.75 120 150 9590.07178  
2.50 120 150 9761.60835  
2.25 120 150 9857.70352  
100.00 120 160 -0.00000  
50.00 120 160 -0.00000  
40.00 120 160 -0.00001  
30.00 120 160 -0.00009  
25.00 120 160 -0.00028  
20.00 120 160 -0.00125  
18.00 120 160 -0.00259  
16.00 120 160 -0.00598  
14.00 120 160 -0.01600  
13.00 120 160 -0.02824  
12.00 120 160 -0.05360  
11.00 120 160 -0.11332  
10.50 120 160 -0.17480  
10.00 120 160 -0.28390  
9.75 120 160 -0.36967  
9.50 120 160 -0.48848  
9.25 120 160 -0.65473  
9.00 120 160 -0.88912  
8.75 120 160 -1.22116  
8.50 120 160 -1.69222  
8.25 120 160 -2.35937  
8.00 120 160 -3.29916  
7.75 120 160 -4.61059  
7.50 120 160 -6.41394  
7.25 120 160 -8.83794  
7.00 120 160 -11.97643  
6.75 120 160 -15.76639  
6.50 120 160 -19.66934  
6.25 120 160 -21.86937  
6.00 120 160 -17.32165  
5.75 120 160 6.81583  
5.50 120 160 81.35380  
5.25 120 160 276.20013  
5.00 120 160 739.86380  
4.75 120 160 1760.83114

4.50 120 160 3828.15171  
4.25 120 160 7177.41912  
4.00 120 160 8867.98278  
3.75 120 160 9398.46344  
3.50 120 160 9642.78442  
3.25 120 160 9780.40579  
3.00 120 160 9862.12728  
2.75 120 160 9912.29421  
2.50 120 160 9943.74430  
2.25 120 160 9963.72635  
100.00 120 170 -0.00000  
50.00 120 170 -0.00000  
40.00 120 170 -0.00001  
30.00 120 170 -0.00009  
25.00 120 170 -0.00031  
20.00 120 170 -0.00138  
18.00 120 170 -0.00288  
16.00 120 170 -0.00668  
14.00 120 170 -0.01809  
13.00 120 170 -0.03222  
12.00 120 170 -0.06204  
11.00 120 170 -0.13443  
10.50 120 170 -0.21124  
10.00 120 170 -0.35102  
9.75 120 170 -0.46284  
9.50 120 170 -0.61948  
9.25 120 170 -0.84079  
9.00 120 170 -1.15527  
8.75 120 170 -1.60330  
8.50 120 170 -2.24098  
8.25 120 170 -3.14444  
8.00 120 170 -4.41310  
7.75 120 170 -6.16914  
7.50 120 170 -8.54477  
7.25 120 170 -11.63660  
7.00 120 170 -15.37217  
6.75 120 170 -19.14587  
6.50 120 170 -20.85845  
6.25 120 170 -14.44512  
6.00 120 170 16.31103  
5.75 120 170 112.71390  
5.50 120 170 375.41730  
5.25 120 170 1036.97167  
5.00 120 170 2594.06759  
4.75 120 170 5942.06219  
4.50 120 170 8711.69299  
4.25 120 170 9435.04554  
4.00 120 170 9713.43779  
3.75 120 170 9847.21952  
3.50 120 170 9916.38598  
3.25 120 170 9953.58866  
3.00 120 170 9974.03767  
2.75 120 170 9985.41385  
2.50 120 170 9991.78534  
2.25 120 170 9995.36735  
100.00 120 180 -0.00000  
50.00 120 180 -0.00000  
40.00 120 180 -0.00002  
30.00 120 180 -0.00010  
25.00 120 180 -0.00032  
20.00 120 180 -0.00143  
18.00 120 180 -0.00298  
16.00 120 180 -0.00694  
14.00 120 180 -0.01887  
13.00 120 180 -0.03373  
12.00 120 180 -0.06528  
11.00 120 180 -0.14278  
10.50 120 180 -0.22589  
10.00 120 180 -0.37850  
9.75 120 180 -0.50131  
9.50 120 180 -0.67397  
9.25 120 180 -0.91867  
9.00 120 180 -1.26723  
8.75 120 180 -1.76460  
8.50 120 180 -2.47301  
8.25 120 180 -3.47627  
8.00 120 180 -4.88244  
7.75 120 180 -6.82073  
7.50 120 180 -9.42105  
7.25 120 180 -12.74621  
7.00 120 180 -16.59703  
6.75 120 180 -19.97982  
6.50 120 180 -19.68929  
6.25 120 180 -6.61997  
6.00 120 180 43.58607  
5.75 120 180 193.43309  
5.50 120 180 596.76760  
5.25 120 180 1611.87193  
5.00 120 180 4000.39471  
4.75 120 180 7900.61029  
4.50 120 180 9253.37450  
4.25 120 180 9651.45982  
4.00 120 180 9825.25986  
3.75 120 180 9909.24976  
3.50 120 180 9952.01248  
3.25 120 180 9974.38445  
3.00 120 180 9986.25794  
2.75 120 180 9992.60801  
2.50 120 180 9996.01806  
2.25 120 180 9997.85334  
100.00 130 0 -0.00000  
50.00 130 0 -0.00000  
40.00 130 0 -0.00001

30.00 130 0 -0.00006  
 25.00 130 0 -0.00019  
 20.00 130 0 -0.00080  
 18.00 130 0 -0.00163  
 16.00 130 0 -0.00374  
 14.00 130 0 -0.01036  
 13.00 130 0 -0.01937  
 12.00 130 0 -0.04112  
 11.00 130 0 -0.10290  
 10.50 130 0 -0.17313  
 10.00 130 0 -0.30114  
 9.75 130 0 -0.40096  
 9.50 130 0 -0.53638  
 9.25 130 0 -0.72011  
 9.00 130 0 -0.96931  
 8.75 130 0 -1.30728  
 8.50 130 0 -1.76604  
 8.25 130 0 -2.39025  
 8.00 130 0 -3.24338  
 7.75 130 0 -4.41703  
 7.50 130 0 -6.04342  
 7.25 130 0 -8.30692  
 7.00 130 0 -11.43608  
 6.75 130 0 -15.61641  
 6.50 130 0 -20.65429  
 6.25 130 0 -24.94782  
 6.00 130 0 -22.66597  
 5.75 130 0 3.45008  
 5.50 130 0 99.48087  
 5.25 130 0 380.41160  
 5.00 130 0 1118.53187  
 4.75 130 0 2931.14102  
 4.50 130 0 6911.09834  
 4.25 130 0 9182.15976  
 4.00 130 0 9719.58977  
 3.75 130 0 9891.57014  
 3.50 130 0 9956.13496  
 3.25 130 0 9981.93370  
 3.00 130 0 9992.50458  
 2.75 130 0 9996.88086  
 2.50 130 0 9998.70037  
 2.25 130 0 9999.45821  
 100.00 130 10 -0.00000  
 50.00 130 10 -0.00000  
 40.00 130 10 -0.00001  
 30.00 130 10 -0.00006  
 25.00 130 10 -0.00018  
 20.00 130 10 -0.00078  
 18.00 130 10 -0.00160  
 16.00 130 10 -0.00368  
 14.00 130 10 -0.01015  
 13.00 130 10 -0.01895  
 12.00 130 10 -0.04016  
 11.00 130 10 -0.10031  
 10.50 130 10 -0.16861  
 10.00 130 10 -0.29289  
 9.75 130 10 -0.38964  
 9.50 130 10 -0.52069  
 9.25 130 10 -0.69810  
 9.00 130 10 -0.93805  
 8.75 130 10 -1.26228  
 8.50 130 10 -1.70028  
 8.25 130 10 -2.29258  
 8.00 130 10 -3.09599  
 7.75 130 10 -4.19150  
 7.50 130 10 -5.69573  
 7.25 130 10 -7.77362  
 7.00 130 10 -10.64171  
 6.75 130 10 -14.52420  
 6.50 130 10 -19.45348  
 6.25 130 10 -24.63191  
 6.00 130 10 -26.66396  
 5.75 130 10 -15.07430  
 5.50 130 10 38.31369  
 5.25 130 10 203.05539  
 5.00 130 10 639.62281  
 4.75 130 10 1695.69699  
 4.50 130 10 4076.99238  
 4.25 130 10 7908.03504  
 4.00 130 10 9308.93818  
 3.75 130 10 9719.49547  
 3.50 130 10 9875.93913  
 3.25 130 10 9943.05741  
 3.00 130 10 9973.42296  
 2.75 130 10 9987.49922  
 2.50 130 10 9994.09878  
 2.25 130 10 9997.20946  
 100.00 130 20 -0.00000  
 50.00 130 20 -0.00000  
 40.00 130 20 -0.00001  
 30.00 130 20 -0.00006  
 25.00 130 20 -0.00018  
 20.00 130 20 -0.00074  
 18.00 130 20 -0.00152  
 16.00 130 20 -0.00348  
 14.00 130 20 -0.00957  
 13.00 130 20 -0.01778  
 12.00 130 20 -0.03752  
 11.00 130 20 -0.09326  
 10.50 130 20 -0.15636  
 10.00 130 20 -0.27078  
 9.75 130 20 -0.35955  
 9.50 130 20 -0.47937

9.25 130 20 -0.64084  
 9.00 130 20 -0.85796  
 8.75 130 20 -1.14905  
 8.50 130 20 -1.53828  
 8.25 130 20 -2.05761  
 8.00 130 20 -2.75010  
 7.75 130 20 -3.67490  
 7.50 130 20 -4.91518  
 7.25 130 20 -6.58961  
 7.00 130 20 -8.86584  
 6.75 130 20 -11.96708  
 6.50 130 20 -16.14124  
 6.25 130 20 -21.50938  
 6.00 130 20 -27.58916  
 5.75 130 20 -32.03374  
 5.50 130 20 -27.63239  
 5.25 130 20 4.24998  
 5.00 130 20 106.94299  
 4.75 130 20 373.22122  
 4.50 130 20 987.54371  
 4.25 130 20 2291.74906  
 4.00 130 20 4880.74781  
 3.75 130 20 8120.73272  
 3.50 130 20 9267.62638  
 3.25 130 20 9659.09160  
 3.00 130 20 9829.61393  
 2.75 130 20 9911.82041  
 2.50 130 20 9953.54739  
 2.25 130 20 9975.30148  
 100.00 130 30 -0.00000  
 50.00 130 30 -0.00000  
 40.00 130 30 -0.00001  
 30.00 130 30 -0.00005  
 25.00 130 30 -0.00016  
 20.00 130 30 -0.00068  
 18.00 130 30 -0.00140  
 16.00 130 30 -0.00320  
 14.00 130 30 -0.00872  
 13.00 130 30 -0.01612  
 12.00 130 30 -0.03377  
 11.00 130 30 -0.08330  
 10.50 130 30 -0.13917  
 10.00 130 30 -0.24016  
 9.75 130 30 -0.31828  
 9.50 130 30 -0.42344  
 9.25 130 30 -0.56469  
 9.00 130 30 -0.75373  
 8.75 130 30 -1.00567  
 8.50 130 30 -1.33978  
 8.25 130 30 -1.78070  
 8.00 130 30 -2.36005  
 7.75 130 30 -3.11906  
 7.50 130 30 -4.11289  
 7.25 130 30 -5.41773  
 7.00 130 30 -7.14198  
 6.75 130 30 -9.44146  
 6.50 130 30 -12.53484  
 6.25 130 30 -16.70268  
 6.00 130 30 -22.22289  
 5.75 130 30 -29.12608  
 5.50 130 30 -36.50834  
 5.25 130 30 -40.84703  
 5.00 130 30 -32.20226  
 4.75 130 30 13.88107  
 4.50 130 30 152.96349  
 4.25 130 30 504.63290  
 4.00 130 30 1315.25011  
 3.75 130 30 3067.90176  
 3.50 130 30 6512.94828  
 3.25 130 30 8846.15736  
 3.00 130 30 9494.78694  
 2.75 130 30 9725.19831  
 2.50 130 30 9836.20400  
 2.25 130 30 9900.51949  
 100.00 130 40 -0.00000  
 50.00 130 40 -0.00000  
 40.00 130 40 -0.00001  
 30.00 130 40 -0.00005  
 25.00 130 40 -0.00014  
 20.00 130 40 -0.00061  
 18.00 130 40 -0.00125  
 16.00 130 40 -0.00286  
 14.00 130 40 -0.00776  
 13.00 130 40 -0.01425  
 12.00 130 40 -0.02953  
 11.00 130 40 -0.07201  
 10.50 130 40 -0.11969  
 10.00 130 40 -0.20565  
 9.75 130 40 -0.27205  
 9.50 130 40 -0.36134  
 9.25 130 40 -0.48113  
 9.00 130 40 -0.64122  
 8.75 130 40 -0.85413  
 8.50 130 40 -1.13568  
 8.25 130 40 -1.50564  
 8.00 130 40 -1.98873  
 7.75 130 40 -2.61590  
 7.50 130 40 -3.42662  
 7.25 130 40 -4.47276  
 7.00 130 40 -5.82500  
 6.75 130 40 -7.58309  
 6.50 130 40 -9.88956  
 6.25 130 40 -12.94247

6.00 130 40 -16.99020  
5.75 130 40 -22.26033  
5.50 130 40 -28.70487  
5.25 130 40 -35.29344  
5.00 130 40 -38.27254  
4.75 130 40 -27.18111  
4.50 130 40 23.79101  
4.25 130 40 173.60720  
4.00 130 40 548.68336  
3.75 130 40 1401.79025  
3.50 130 40 3191.10341  
3.25 130 40 6499.40139  
3.00 130 40 8717.10378  
2.75 130 40 9372.44917  
2.50 130 40 9621.21987  
2.25 130 40 9760.24128  
100.00 130 50 -0.00000  
50.00 130 50 -0.00000  
40.00 130 50 -0.00001  
30.00 130 50 -0.00004  
25.00 130 50 -0.00012  
20.00 130 50 -0.00054  
18.00 130 50 -0.00110  
16.00 130 50 -0.00252  
14.00 130 50 -0.00681  
13.00 130 50 -0.01239  
12.00 130 50 -0.02533  
11.00 130 50 -0.06069  
10.50 130 50 -0.10003  
10.00 130 50 -0.17073  
9.75 130 50 -0.22527  
9.50 130 50 -0.29861  
9.25 130 50 -0.39702  
9.00 130 50 -0.52862  
8.75 130 50 -0.70382  
8.50 130 50 -0.93572  
8.25 130 50 -1.24072  
8.00 130 50 -1.63910  
7.75 130 50 -2.15593  
7.50 130 50 -2.82233  
7.25 130 50 -3.67772  
7.00 130 50 -4.77350  
6.75 130 50 -6.17913  
6.50 130 50 -7.99083  
6.25 130 50 -10.34137  
6.00 130 50 -13.40279  
5.75 130 50 -17.35851  
5.50 130 50 -22.28420  
5.25 130 50 -27.79783  
5.00 130 50 -32.17516  
4.75 130 50 -30.30294  
4.50 130 50 -9.23384  
4.25 130 50 60.93225  
4.00 130 50 244.55066  
3.75 130 50 670.82538  
3.50 130 50 1577.58609  
3.25 130 50 3349.70112  
3.00 130 50 6390.81483  
2.75 130 50 8528.68130  
2.50 130 50 9235.55518  
2.25 130 50 9524.52509  
100.00 130 60 -0.00000  
50.00 130 60 -0.00000  
40.00 130 60 -0.00001  
30.00 130 60 -0.00003  
25.00 130 60 -0.00011  
20.00 130 60 -0.00047  
18.00 130 60 -0.00096  
16.00 130 60 -0.00221  
14.00 130 60 -0.00594  
13.00 130 60 -0.01073  
12.00 130 60 -0.02156  
11.00 130 60 -0.05038  
10.50 130 60 -0.08198  
10.00 130 60 -0.13841  
9.75 130 60 -0.18183  
9.50 130 60 -0.24019  
9.25 130 60 -0.31854  
9.00 130 60 -0.42347  
8.75 130 60 -0.56347  
8.50 130 60 -0.74932  
8.25 130 60 -0.99463  
8.00 130 60 -1.31630  
7.75 130 60 -1.73524  
7.50 130 60 -2.27729  
7.25 130 60 -2.97459  
7.00 130 60 -3.86803  
6.75 130 60 -5.01102  
6.50 130 60 -6.47553  
6.25 130 60 -8.36009  
6.00 130 60 -10.79719  
5.75 130 60 -13.95054  
5.50 130 60 -17.97629  
5.25 130 60 -22.88524  
5.00 130 60 -28.16705  
4.75 130 60 -31.88370  
4.50 130 60 -28.64785  
4.25 130 60 -5.38422  
4.00 130 60 67.03542  
3.75 130 60 249.10803  
3.50 130 60 657.78888  
3.25 130 60 1500.41595  
3.00 130 60 3104.77400

2.75 130 60 5891.65443  
 2.50 130 60 8315.25314  
 2.25 130 60 9190.78755  
 100.00 130 70 -0.00000  
 50.00 130 70 -0.00000  
 40.00 130 70 -0.00000  
 30.00 130 70 -0.00003  
 25.00 130 70 -0.00009  
 20.00 130 70 -0.00041  
 18.00 130 70 -0.00085  
 16.00 130 70 -0.00195  
 14.00 130 70 -0.00524  
 13.00 130 70 -0.00938  
 12.00 130 70 -0.01849  
 11.00 130 70 -0.04186  
 10.50 130 70 -0.06692  
 10.00 130 70 -0.11116  
 9.75 130 70 -0.14503  
 9.50 130 70 -0.19048  
 9.25 130 70 -0.25146  
 9.00 130 70 -0.33321  
 8.75 130 70 -0.44253  
 8.50 130 70 -0.58817  
 8.25 130 70 -0.78132  
 8.00 130 70 -1.03607  
 7.75 130 70 -1.37004  
 7.50 130 70 -1.80521  
 7.25 130 70 -2.36900  
 7.00 130 70 -3.09604  
 6.75 130 70 -4.03094  
 6.50 130 70 -5.23276  
 6.25 130 70 -6.78173  
 6.00 130 70 -8.78810  
 5.75 130 70 -11.40038  
 5.50 130 70 -14.80341  
 5.25 130 70 -19.18034  
 5.00 130 70 -24.57605  
 4.75 130 70 -30.52282  
 4.50 130 70 -35.13401  
 4.25 130 70 -33.07371  
 4.00 130 70 -11.27489  
 3.75 130 70 59.58615  
 3.50 130 70 241.01642  
 3.25 130 70 654.23735  
 3.00 130 70 1523.41374  
 2.75 130 70 3236.21174  
 2.50 130 70 6334.37367  
 2.25 130 70 8643.25482  
 100.00 130 80 -0.00000  
 50.00 130 80 -0.00000  
 40.00 130 80 -0.00000  
 30.00 130 80 -0.00002  
 25.00 130 80 -0.00008  
 20.00 130 80 -0.00037  
 18.00 130 80 -0.00077  
 16.00 130 80 -0.00178  
 14.00 130 80 -0.00476  
 13.00 130 80 -0.00844  
 12.00 130 80 -0.01629  
 11.00 130 80 -0.03557  
 10.50 130 80 -0.05564  
 10.00 130 80 -0.09047  
 9.75 130 80 -0.11689  
 9.50 130 80 -0.15218  
 9.25 130 80 -0.19944  
 9.00 130 80 -0.26276  
 8.75 130 80 -0.34753  
 8.50 130 80 -0.46081  
 8.25 130 80 -0.61178  
 8.00 130 80 -0.81218  
 7.75 130 80 -1.07703  
 7.50 130 80 -1.42540  
 7.25 130 80 -1.88148  
 7.00 130 80 -2.47618  
 6.75 130 80 -3.24945  
 6.50 130 80 -4.25401  
 6.25 130 80 -5.56107  
 6.00 130 80 -7.26850  
 5.75 130 80 -9.51124  
 5.50 130 80 -12.47004  
 5.25 130 80 -16.36607  
 5.00 130 80 -21.40741  
 4.75 130 80 -27.60517  
 4.50 130 80 -34.27315  
 4.25 130 80 -38.81224  
 4.00 130 80 -33.96764  
 3.75 130 80 -1.99164  
 3.50 130 80 97.12805  
 3.25 130 80 348.14023  
 3.00 130 80 920.90840  
 2.75 130 80 2137.73093  
 2.50 130 80 4573.28849  
 2.25 130 80 7925.09787  
 100.00 130 90 -0.00000  
 50.00 130 90 -0.00000  
 40.00 130 90 -0.00000  
 30.00 130 90 -0.00002  
 25.00 130 90 -0.00008  
 20.00 130 90 -0.00035  
 18.00 130 90 -0.00073  
 16.00 130 90 -0.00170  
 14.00 130 90 -0.00454  
 13.00 130 90 -0.00797

12.00 130 90 -0.01507  
 11.00 130 90 -0.03173  
 10.50 130 90 -0.04846  
 10.00 130 90 -0.07681  
 9.75 130 90 -0.09803  
 9.50 130 90 -0.12617  
 9.25 130 90 -0.16366  
 9.00 130 90 -0.21373  
 8.75 130 90 -0.28072  
 8.50 130 90 -0.37037  
 8.25 130 90 -0.49030  
 8.00 130 90 -0.65047  
 7.75 130 90 -0.86393  
 7.50 130 90 -1.14766  
 7.25 130 90 -1.52376  
 7.00 130 90 -2.02111  
 6.75 130 90 -2.67775  
 6.50 130 90 -3.54434  
 6.25 130 90 -4.68945  
 6.00 130 90 -6.20696  
 5.75 130 90 -8.22579  
 5.50 130 90 -10.91966  
 5.25 130 90 -14.50841  
 5.00 130 90 -19.22652  
 4.75 130 90 -25.19720  
 4.50 130 90 -32.06796  
 4.25 130 90 -38.09088  
 4.00 130 90 -37.98558  
 3.75 130 90 -18.27165  
 3.50 130 90 52.39822  
 3.25 130 90 242.27460  
 3.00 130 90 692.11801  
 2.75 130 90 1678.08257  
 2.50 130 90 3714.96483  
 2.25 130 90 7245.13378  
 100.00 130 100 -0.00000  
 50.00 130 100 -0.00000  
 40.00 130 100 -0.00000  
 30.00 130 100 -0.00002  
 25.00 130 100 -0.00008  
 20.00 130 100 -0.00037  
 18.00 130 100 -0.00077  
 16.00 130 100 -0.00177  
 14.00 130 100 -0.00465  
 13.00 130 100 -0.00808  
 12.00 130 100 -0.01500  
 11.00 130 100 -0.03052  
 10.50 130 100 -0.04552  
 10.00 130 100 -0.07028  
 9.75 130 100 -0.08850  
 9.50 130 100 -0.11242  
 9.25 130 100 -0.14404  
 9.00 130 100 -0.18603  
 8.75 130 100 -0.24203  
 8.50 130 100 -0.31694  
 8.25 130 100 -0.41736  
 8.00 130 100 -0.55217  
 7.75 130 100 -0.73325  
 7.50 130 100 -0.97652  
 7.25 130 100 -1.30329  
 7.00 130 100 -1.74220  
 6.75 130 100 -2.33184  
 6.50 130 100 -3.12455  
 6.25 130 100 -4.19179  
 6.00 130 100 -5.63141  
 5.75 130 100 -7.57689  
 5.50 130 100 -10.20648  
 5.25 130 100 -13.74543  
 5.00 130 100 -18.44128  
 4.75 130 100 -24.46238  
 4.50 130 100 -31.60287  
 4.25 130 100 -38.53574  
 4.00 130 100 -41.06739  
 3.75 130 100 -28.28230  
 3.50 130 100 25.60290  
 3.25 130 100 177.83065  
 3.00 130 100 549.89488  
 2.75 130 100 1390.94291  
 2.50 130 100 3199.08132  
 2.25 130 100 6753.62994  
 100.00 130 110 -0.00000  
 50.00 130 110 -0.00000  
 40.00 130 110 -0.00000  
 30.00 130 110 -0.00003  
 25.00 130 110 -0.00010  
 20.00 130 110 -0.00043  
 18.00 130 110 -0.00088  
 16.00 130 110 -0.00200  
 14.00 130 110 -0.00519  
 13.00 130 110 -0.00893  
 12.00 130 110 -0.01632  
 11.00 130 110 -0.03233  
 10.50 130 110 -0.04731  
 10.00 130 110 -0.07143  
 9.75 130 110 -0.08889  
 9.50 130 110 -0.11160  
 9.25 130 110 -0.14136  
 9.00 130 110 -0.18066  
 8.75 130 110 -0.23288  
 8.50 130 110 -0.30268  
 8.25 130 110 -0.39647  
 8.00 130 110 -0.52305  
 7.75 130 110 -0.69448

7.50 130 110 -0.92738  
7.25 130 110 -1.24456  
7.00 130 110 -1.67740  
6.75 130 110 -2.26902  
6.50 130 110 -3.07876  
6.25 130 110 -4.18809  
6.00 130 110 -5.70839  
5.75 130 110 -7.79025  
5.50 130 110 -10.63235  
5.25 130 110 -14.48390  
5.00 130 110 -19.62402  
4.75 130 110 -26.27794  
4.50 130 110 -34.37779  
4.25 130 110 -42.96408  
4.00 130 110 -48.78925  
3.75 130 110 -43.19074  
3.50 130 110 -5.25162  
3.25 130 110 113.02659  
3.00 130 110 418.99675  
2.75 130 110 1150.60514  
2.50 130 110 2836.50363  
2.25 130 110 6529.96608  
100.00 130 120 -0.00000  
50.00 130 120 -0.00000  
40.00 130 120 -0.00001  
30.00 130 120 -0.00004  
25.00 130 120 -0.00012  
20.00 130 120 -0.00053  
18.00 130 120 -0.00108  
16.00 130 120 -0.00244  
14.00 130 120 -0.00628  
13.00 130 120 -0.01074  
12.00 130 120 -0.01944  
11.00 130 120 -0.03795  
10.50 130 120 -0.05498  
10.00 130 120 -0.08205  
9.75 130 120 -0.10149  
9.50 130 120 -0.12668  
9.25 130 120 -0.15962  
9.00 130 120 -0.20310  
8.75 130 120 -0.26100  
8.50 130 120 -0.33875  
8.25 130 120 -0.44394  
8.00 130 120 -0.58721  
7.75 130 120 -0.78345  
7.50 130 120 -1.05344  
7.25 130 120 -1.42614  
7.00 130 120 -1.94171  
6.75 130 120 -2.65556  
6.50 130 120 -3.64361  
6.25 130 120 -5.00897  
6.00 130 120 -6.88983  
5.75 130 120 -9.46776  
5.50 130 120 -12.97354  
5.25 130 120 -17.68281  
5.00 130 120 -23.88385  
4.75 130 120 -31.77692  
4.50 130 120 -41.21793  
4.25 130 120 -51.12076  
4.00 130 120 -58.12253  
3.75 130 120 -53.64815  
3.50 130 120 -17.40043  
3.25 130 120 97.47790  
3.00 130 120 399.52328  
2.75 130 120 1144.98028  
2.50 130 120 2952.18674  
2.25 130 120 7010.77059  
100.00 130 130 -0.00000  
50.00 130 130 -0.00000  
40.00 130 130 -0.00001  
30.00 130 130 -0.00005  
25.00 130 130 -0.00016  
20.00 130 130 -0.00068  
18.00 130 130 -0.00138  
16.00 130 130 -0.00311  
14.00 130 130 -0.00800  
13.00 130 130 -0.01370  
12.00 130 130 -0.02483  
11.00 130 130 -0.04857  
10.50 130 130 -0.07050  
10.00 130 130 -0.10562  
9.75 130 130 -0.13107  
9.50 130 130 -0.16430  
9.25 130 130 -0.20819  
9.00 130 130 -0.26678  
8.75 130 130 -0.34582  
8.50 130 130 -0.45342  
8.25 130 130 -0.60112  
8.00 130 130 -0.80516  
7.75 130 130 -1.08835  
7.50 130 130 -1.48249  
7.25 130 130 -2.03153  
7.00 130 130 -2.79544  
6.75 130 130 -3.85506  
6.50 130 130 -5.31734  
6.25 130 130 -7.32059  
6.00 130 130 -10.03747  
5.75 130 130 -13.67089  
5.50 130 130 -18.43192  
5.25 130 130 -24.47586  
5.00 130 130 -31.74832  
4.75 130 130 -39.64868  
4.50 130 130 -46.34087

4.25 130 130 -47.41044  
4.00 130 130 -33.32696  
3.75 130 130 15.33665  
3.50 130 130 137.23766  
3.25 130 130 409.85534  
3.00 130 130 994.31900  
2.75 130 130 2245.50926  
2.50 130 130 4993.40083  
2.25 130 130 8503.11744  
100.00 130 140 -0.00000  
50.00 130 140 -0.00000  
40.00 130 140 -0.00001  
30.00 130 140 -0.00006  
25.00 130 140 -0.00020  
20.00 130 140 -0.00086  
18.00 130 140 -0.00177  
16.00 130 140 -0.00400  
14.00 130 140 -0.01037  
13.00 130 140 -0.01788  
12.00 130 140 -0.03277  
11.00 130 140 -0.06525  
10.50 130 140 -0.09608  
10.00 130 140 -0.14684  
9.75 130 140 -0.18451  
9.50 130 140 -0.23465  
9.25 130 140 -0.30220  
9.00 130 140 -0.39421  
8.75 130 140 -0.52078  
8.50 130 140 -0.69631  
8.25 130 140 -0.94114  
8.00 130 140 -1.28379  
7.75 130 140 -1.76378  
7.50 130 140 -2.43500  
7.25 130 140 -3.36958  
7.00 130 140 -4.66161  
6.75 130 140 -6.42951  
6.50 130 140 -8.81388  
6.25 130 140 -11.96378  
6.00 130 140 -15.99517  
5.75 130 140 -20.88681  
5.50 130 140 -26.24115  
5.25 130 140 -30.77195  
5.00 130 140 -31.27603  
4.75 130 140 -20.71641  
4.50 130 140 15.05838  
4.25 130 140 102.40695  
4.00 130 140 287.06301  
3.75 130 140 643.78589  
3.50 130 140 1291.11427  
3.25 130 140 2421.35261  
3.00 130 140 4371.83363  
2.75 130 140 7291.81129  
2.50 130 140 8921.05627  
2.25 130 140 9522.98579  
100.00 130 150 -0.00000  
50.00 130 150 -0.00000  
40.00 130 150 -0.00001  
30.00 130 150 -0.00007  
25.00 130 150 -0.00024  
20.00 130 150 -0.00107  
18.00 130 150 -0.00219  
16.00 130 150 -0.00501  
14.00 130 150 -0.01318  
13.00 130 150 -0.02300  
12.00 130 150 -0.04287  
11.00 130 150 -0.08787  
10.50 130 150 -0.13233  
10.00 130 150 -0.20842  
9.75 130 150 -0.26666  
9.50 130 150 -0.34589  
9.25 130 150 -0.45493  
9.00 130 150 -0.60649  
8.75 130 150 -0.81872  
8.50 130 150 -1.11737  
8.25 130 150 -1.53849  
8.00 130 150 -2.13170  
7.75 130 150 -2.96390  
7.50 130 150 -4.12264  
7.25 130 150 -5.71761  
7.00 130 150 -7.87620  
6.75 130 150 -10.72381  
6.50 130 150 -14.32628  
6.25 130 150 -18.54201  
6.00 130 150 -22.66502  
5.75 130 150 -24.60417  
5.50 130 150 -19.08829  
5.25 130 150 6.02213  
5.00 130 150 76.72299  
4.75 130 150 244.67578  
4.50 130 150 603.90433  
4.25 130 150 1307.54128  
4.00 130 150 2571.49676  
3.75 130 150 4650.36433  
3.50 130 150 7298.51021  
3.25 130 150 8699.83069  
3.00 130 150 9288.84943  
2.75 130 150 9589.90180  
2.50 130 150 9761.82376  
2.25 130 150 9858.00992  
100.00 130 160 -0.00000  
50.00 130 160 -0.00000  
40.00 130 160 -0.00001  
30.00 130 160 -0.00008

25.00 130 160 -0.00028  
 20.00 130 160 -0.00125  
 18.00 130 160 -0.00259  
 16.00 130 160 -0.00597  
 14.00 130 160 -0.01598  
 13.00 130 160 -0.02821  
 12.00 130 160 -0.05356  
 11.00 130 160 -0.11329  
 10.50 130 160 -0.17479  
 10.00 130 160 -0.28395  
 9.75 130 160 -0.36978  
 9.50 130 160 -0.48867  
 9.25 130 160 -0.65505  
 9.00 130 160 -0.88963  
 8.75 130 160 -1.22192  
 8.50 130 160 -1.69338  
 8.25 130 160 -2.36109  
 8.00 130 160 -3.30170  
 7.75 130 160 -4.61432  
 7.50 130 160 -6.41937  
 7.25 130 160 -8.84584  
 7.00 130 160 -11.98788  
 6.75 130 160 -15.78295  
 6.50 130 160 -19.69321  
 6.25 130 160 -21.90352  
 6.00 130 160 -17.36987  
 5.75 130 160 6.74944  
 5.50 130 160 81.26670  
 5.25 130 160 276.09609  
 5.00 130 160 739.76266  
 4.75 130 160 1760.78261  
 4.50 130 160 3828.23594  
 4.25 130 160 7177.56686  
 4.00 130 160 8867.99071  
 3.75 130 160 9398.41909  
 3.50 130 160 9642.74425  
 3.25 130 160 9780.37312  
 3.00 130 160 9862.10185  
 2.75 130 160 9912.27489  
 2.50 130 160 9943.72988  
 2.25 130 160 9963.71573  
 100.00 130 170 -0.00000  
 50.00 130 170 -0.00000  
 40.00 130 170 -0.00001  
 30.00 130 170 -0.00009  
 25.00 130 170 -0.00031  
 20.00 130 170 -0.00138  
 18.00 130 170 -0.00287  
 16.00 130 170 -0.00668  
 14.00 130 170 -0.01808  
 13.00 130 170 -0.03221  
 12.00 130 170 -0.06202  
 11.00 130 170 -0.13442  
 10.50 130 170 -0.21123  
 10.00 130 170 -0.35102  
 9.75 130 170 -0.46286  
 9.50 130 170 -0.61952  
 9.25 130 170 -0.84086  
 9.00 130 170 -1.15539  
 8.75 130 170 -1.60348  
 8.50 130 170 -2.24127  
 8.25 130 170 -3.14488  
 8.00 130 170 -4.41376  
 7.75 130 170 -6.17010  
 7.50 130 170 -8.54618  
 7.25 130 170 -11.63865  
 7.00 130 170 -15.37510  
 6.75 130 170 -19.14997  
 6.50 130 170 -20.86397  
 6.25 130 170 -14.45196  
 6.00 130 170 16.30427  
 5.75 130 170 112.71244  
 5.50 130 170 375.43643  
 5.25 130 170 1037.05115  
 5.00 130 170 2594.29895  
 4.75 130 170 5942.57198  
 4.50 130 170 8711.86051  
 4.25 130 170 9435.09939  
 4.00 130 170 9713.46410  
 3.75 130 170 9847.23359  
 3.50 130 170 9916.39387  
 3.25 130 170 9953.59320  
 3.00 130 170 9974.04031  
 2.75 130 170 9985.41539  
 2.50 130 170 9991.78625  
 2.25 130 170 9995.36788  
 100.00 130 180 -0.00000  
 50.00 130 180 -0.00000  
 40.00 130 180 -0.00002  
 30.00 130 180 -0.00010  
 25.00 130 180 -0.00032  
 20.00 130 180 -0.00143  
 18.00 130 180 -0.00298  
 16.00 130 180 -0.00694  
 14.00 130 180 -0.01887  
 13.00 130 180 -0.03373  
 12.00 130 180 -0.06528  
 11.00 130 180 -0.14278  
 10.50 130 180 -0.22589  
 10.00 130 180 -0.37850  
 9.75 130 180 -0.50131  
 9.50 130 180 -0.67397  
 9.25 130 180 -0.91867

9.00 130 180 -1.26723  
 8.75 130 180 -1.76460  
 8.50 130 180 -2.47301  
 8.25 130 180 -3.47627  
 8.00 130 180 -4.88244  
 7.75 130 180 -6.82073  
 7.50 130 180 -9.42105  
 7.25 130 180 -12.74621  
 7.00 130 180 -16.59703  
 6.75 130 180 -19.97982  
 6.50 130 180 -19.68929  
 6.25 130 180 -6.61997  
 6.00 130 180 43.58607  
 5.75 130 180 193.43309  
 5.50 130 180 596.76760  
 5.25 130 180 1611.87193  
 5.00 130 180 4000.39471  
 4.75 130 180 7900.61029  
 4.50 130 180 9253.37450  
 4.25 130 180 9651.45982  
 4.00 130 180 9825.25986  
 3.75 130 180 9909.24976  
 3.50 130 180 9952.01248  
 3.25 130 180 9974.38445  
 3.00 130 180 9986.25794  
 2.75 130 180 9992.60801  
 2.50 130 180 9996.01806  
 2.25 130 180 9997.85334  
 100.00 140 0 -0.00000  
 50.00 140 0 -0.00000  
 40.00 140 0 -0.00001  
 30.00 140 0 -0.00006  
 25.00 140 0 -0.00019  
 20.00 140 0 -0.00080  
 18.00 140 0 -0.00163  
 16.00 140 0 -0.00374  
 14.00 140 0 -0.01036  
 13.00 140 0 -0.01937  
 12.00 140 0 -0.04112  
 11.00 140 0 -0.10290  
 10.50 140 0 -0.17313  
 10.00 140 0 -0.30114  
 9.75 140 0 -0.40096  
 9.50 140 0 -0.53638  
 9.25 140 0 -0.72011  
 9.00 140 0 -0.96931  
 8.75 140 0 -1.30728  
 8.50 140 0 -1.76604  
 8.25 140 0 -2.39025  
 8.00 140 0 -3.24338  
 7.75 140 0 -4.41703  
 7.50 140 0 -6.04342  
 7.25 140 0 -8.30692  
 7.00 140 0 -11.43608  
 6.75 140 0 -15.61641  
 6.50 140 0 -20.65429  
 6.25 140 0 -24.94782  
 6.00 140 0 -22.66597  
 5.75 140 0 3.45008  
 5.50 140 0 99.48087  
 5.25 140 0 380.41160  
 5.00 140 0 1118.53187  
 4.75 140 0 2931.14102  
 4.50 140 0 6911.09834  
 4.25 140 0 9182.15976  
 4.00 140 0 9719.58977  
 3.75 140 0 9891.57014  
 3.50 140 0 9956.13496  
 3.25 140 0 9981.93370  
 3.00 140 0 9992.50458  
 2.75 140 0 9996.88086  
 2.50 140 0 9998.70037  
 2.25 140 0 9999.45821  
 100.00 140 10 -0.00000  
 50.00 140 10 -0.00000  
 40.00 140 10 -0.00001  
 30.00 140 10 -0.00006  
 25.00 140 10 -0.00018  
 20.00 140 10 -0.00078  
 18.00 140 10 -0.00160  
 16.00 140 10 -0.00368  
 14.00 140 10 -0.01018  
 13.00 140 10 -0.01902  
 12.00 140 10 -0.04036  
 11.00 140 10 -0.10094  
 10.50 140 10 -0.16975  
 10.00 140 10 -0.29499  
 9.75 140 10 -0.39247  
 9.50 140 10 -0.52449  
 9.25 140 10 -0.70319  
 9.00 140 10 -0.94481  
 8.75 140 10 -1.27120  
 8.50 140 10 -1.71197  
 8.25 140 10 -2.30781  
 8.00 140 10 -3.11572  
 7.75 140 10 -4.21706  
 7.50 140 10 -5.72902  
 7.25 140 10 -7.81767  
 7.00 140 10 -10.70180  
 6.75 140 10 -14.61012  
 6.50 140 10 -19.58441  
 6.25 140 10 -24.84632  
 6.00 140 10 -27.04055

5.75 140 10 -15.77505  
5.50 140 10 36.95716  
5.25 140 10 200.38007  
5.00 140 10 634.37204  
4.75 140 10 1685.74307  
4.50 140 10 4059.62865  
4.25 140 10 7898.71997  
4.00 140 10 9308.20282  
3.75 140 10 9719.90548  
3.50 140 10 9876.38517  
3.25 140 10 9943.37864  
3.00 140 10 9973.62707  
2.75 140 10 9987.62084  
2.50 140 10 9994.16834  
2.25 140 10 9997.24812  
100.00 140 20 -0.00000  
50.00 140 20 -0.00000  
40.00 140 20 -0.00001  
30.00 140 20 -0.00006  
25.00 140 20 -0.00018  
20.00 140 20 -0.00075  
18.00 140 20 -0.00153  
16.00 140 20 -0.00351  
14.00 140 20 -0.00968  
13.00 140 20 -0.01805  
12.00 140 20 -0.03823  
11.00 140 20 -0.09550  
10.50 140 20 -0.16045  
10.00 140 20 -0.27830  
9.75 140 20 -0.36969  
9.50 140 20 -0.49302  
9.25 140 20 -0.65913  
9.00 140 20 -0.88230  
8.75 140 20 -1.18125  
8.50 140 20 -1.58058  
8.25 140 20 -2.11286  
8.00 140 20 -2.82196  
7.75 140 20 -3.76829  
7.50 140 20 -5.03718  
7.25 140 20 -6.75115  
7.00 140 20 -9.08513  
6.75 140 20 -12.27606  
6.50 140 20 -16.59780  
6.25 140 20 -22.22016  
6.00 140 20 -28.75137  
5.75 140 20 -34.01026  
5.50 140 20 -31.07874  
5.25 140 20 -1.79952  
5.00 140 20 96.52685  
4.75 140 20 356.42609  
4.50 140 20 964.93837  
4.25 140 20 2277.91491  
4.00 140 20 4941.44922  
3.75 140 20 8225.36182  
3.50 140 20 9327.87923  
3.25 140 20 9695.43405  
3.00 140 20 9851.52316  
2.75 140 20 9925.15999  
2.50 140 20 9961.64690  
2.25 140 20 9980.17937  
100.00 140 30 -0.00000  
50.00 140 30 -0.00000  
40.00 140 30 -0.00001  
30.00 140 30 -0.00005  
25.00 140 30 -0.00016  
20.00 140 30 -0.00070  
18.00 140 30 -0.00142  
16.00 140 30 -0.00326  
14.00 140 30 -0.00895  
13.00 140 30 -0.01663  
12.00 140 30 -0.03511  
11.00 140 30 -0.08749  
10.50 140 30 -0.14682  
10.00 140 30 -0.25420  
9.75 140 30 -0.33725  
9.50 140 30 -0.44901  
9.25 140 30 -0.59898  
9.00 140 30 -0.79949  
8.75 140 30 -1.06636  
8.50 140 30 -1.41980  
8.25 140 30 -1.88565  
8.00 140 30 -2.49718  
7.75 140 30 -3.29816  
7.50 140 30 -4.34783  
7.25 140 30 -5.72945  
7.00 140 30 -7.56359  
6.75 140 30 -10.02694  
6.50 140 30 -13.37205  
6.25 140 30 -17.92995  
6.00 140 30 -24.04122  
5.75 140 30 -31.77951  
5.50 140 30 -40.15306  
5.25 140 30 -45.09947  
5.00 140 30 -34.83142  
4.75 140 30 20.46041  
4.50 140 30 190.73069  
4.25 140 30 632.53443  
4.00 140 30 1682.87519  
3.75 140 30 4031.45516  
3.50 140 30 7847.00526  
3.25 140 30 9261.51353  
3.00 140 30 9658.11153  
2.75 140 30 9814.33643

2.50 140 30 9895.91023  
 2.25 140 30 9940.71133  
 100.00 140 40 -0.00000  
 50.00 140 40 -0.00000  
 40.00 140 40 -0.00001  
 30.00 140 40 -0.00005  
 25.00 140 40 -0.00015  
 20.00 140 40 -0.00063  
 18.00 140 40 -0.00129  
 16.00 140 40 -0.00296  
 14.00 140 40 -0.00809  
 13.00 140 40 -0.01496  
 12.00 140 40 -0.03140  
 11.00 140 40 -0.07776  
 10.50 140 40 -0.13015  
 10.00 140 40 -0.22482  
 9.75 140 40 -0.29797  
 9.50 140 40 -0.39629  
 9.25 140 40 -0.52808  
 9.00 140 40 -0.70399  
 8.75 140 40 -0.93761  
 8.50 140 40 -1.24607  
 8.25 140 40 -1.65091  
 8.00 140 40 -2.17918  
 7.75 140 40 -2.86533  
 7.50 140 40 -3.75434  
 7.25 140 40 -4.90706  
 7.00 140 40 -6.40904  
 6.75 140 40 -8.38363  
 6.50 140 40 -11.00741  
 6.25 140 40 -14.51737  
 6.00 140 40 -19.17585  
 5.75 140 40 -25.10308  
 5.50 140 40 -31.76160  
 5.25 140 40 -36.60798  
 5.00 140 40 -31.87335  
 4.75 140 40 2.68278  
 4.50 140 40 115.38246  
 4.25 140 40 414.88727  
 4.00 140 40 1132.96280  
 3.75 140 40 2732.61347  
 3.50 140 40 6009.33815  
 3.25 140 40 8687.52297  
 3.00 140 40 9426.24101  
 2.75 140 40 9684.61057  
 2.50 140 40 9816.84096  
 2.25 140 40 9891.18875  
 100.00 140 50 -0.00000  
 50.00 140 50 -0.00000  
 40.00 140 50 -0.00001  
 30.00 140 50 -0.00004  
 25.00 140 50 -0.00013  
 20.00 140 50 -0.00056  
 18.00 140 50 -0.00115  
 16.00 140 50 -0.00264  
 14.00 140 50 -0.00719  
 13.00 140 50 -0.01323  
 12.00 140 50 -0.02747  
 11.00 140 50 -0.06714  
 10.50 140 50 -0.11170  
 10.00 140 50 -0.19203  
 9.75 140 50 -0.25406  
 9.50 140 50 -0.33744  
 9.25 140 50 -0.44923  
 9.00 140 50 -0.59854  
 8.75 140 50 -0.79698  
 8.50 140 50 -1.05919  
 8.25 140 50 -1.40350  
 8.00 140 50 -1.85276  
 7.75 140 50 -2.43565  
 7.50 140 50 -3.18871  
 7.25 140 50 -4.15989  
 7.00 140 50 -5.41428  
 6.75 140 50 -7.04267  
 6.50 140 50 -9.17178  
 6.25 140 50 -11.96926  
 6.00 140 50 -15.62114  
 5.75 140 50 -20.22312  
 5.50 140 50 -25.44583  
 5.25 140 50 -29.66629  
 5.00 140 50 -27.92353  
 4.75 140 50 -7.41694  
 4.50 140 50 61.90941  
 4.25 140 50 246.16624  
 4.00 140 50 682.93775  
 3.75 140 50 1641.41816  
 3.50 140 50 3602.41682  
 3.25 140 50 6988.52438  
 3.00 140 50 8858.70959  
 2.75 140 50 9422.18011  
 2.50 140 50 9651.77462  
 2.25 140 50 9782.53444  
 100.00 140 60 -0.00000  
 50.00 140 60 -0.00000  
 40.00 140 60 -0.00001  
 30.00 140 60 -0.00003  
 25.00 140 60 -0.00011  
 20.00 140 60 -0.00049  
 18.00 140 60 -0.00101  
 16.00 140 60 -0.00233  
 14.00 140 60 -0.00635  
 13.00 140 60 -0.01158  
 12.00 140 60 -0.02369

11.00 140 60 -0.05663  
 10.50 140 60 -0.09319  
 10.00 140 60 -0.15876  
 9.75 140 60 -0.20931  
 9.50 140 60 -0.27725  
 9.25 140 60 -0.36840  
 9.00 140 60 -0.49033  
 8.75 140 60 -0.65271  
 8.50 140 60 -0.86784  
 8.25 140 60 -1.15116  
 8.00 140 60 -1.52194  
 7.75 140 60 -2.00422  
 7.50 140 60 -2.62821  
 7.25 140 60 -3.43261  
 7.00 140 60 -4.46834  
 6.75 140 60 -5.80451  
 6.50 140 60 -7.53647  
 6.25 140 60 -9.79383  
 6.00 140 60 -12.73939  
 5.75 140 60 -16.53327  
 5.50 140 60 -21.19924  
 5.25 140 60 -26.25183  
 5.00 140 60 -29.78609  
 4.75 140 60 -26.43137  
 4.50 140 60 -3.01578  
 4.25 140 60 70.18081  
 4.00 140 60 256.18232  
 3.75 140 60 681.08679  
 3.50 140 60 1580.07236  
 3.25 140 60 3348.85667  
 3.00 140 60 6442.75427  
 2.75 140 60 8602.43712  
 2.50 140 60 9305.49971  
 2.25 140 60 9587.15172  
 100.00 140 70 -0.00000  
 50.00 140 70 -0.00000  
 40.00 140 70 -0.00000  
 30.00 140 70 -0.00003  
 25.00 140 70 -0.00009  
 20.00 140 70 -0.00043  
 18.00 140 70 -0.00089  
 16.00 140 70 -0.00207  
 14.00 140 70 -0.00562  
 13.00 140 70 -0.01017  
 12.00 140 70 -0.02040  
 11.00 140 70 -0.04730  
 10.50 140 70 -0.07656  
 10.00 140 70 -0.12856  
 9.75 140 70 -0.16849  
 9.50 140 70 -0.22209  
 9.25 140 70 -0.29402  
 9.00 140 70 -0.39036  
 8.75 140 70 -0.51900  
 8.50 140 70 -0.69005  
 8.25 140 70 -0.91636  
 8.00 140 70 -1.21408  
 7.75 140 70 -1.60351  
 7.50 140 70 -2.11011  
 7.25 140 70 -2.76618  
 7.00 140 70 -3.61348  
 6.75 140 70 -4.70748  
 6.50 140 70 -6.12386  
 6.25 140 70 -7.96748  
 6.00 140 70 -10.38182  
 5.75 140 70 -13.55111  
 5.50 140 70 -17.67279  
 5.25 140 70 -22.84524  
 5.00 140 70 -28.74563  
 4.75 140 70 -33.82880  
 4.50 140 70 -33.49089  
 4.25 140 70 -16.09278  
 4.00 140 70 45.23993  
 3.75 140 70 208.63492  
 3.50 140 70 592.52661  
 3.25 140 70 1422.58448  
 3.00 140 70 3093.44773  
 2.75 140 70 6162.86127  
 2.50 140 70 8566.38839  
 2.25 140 70 9329.11011  
 100.00 140 80 -0.00000  
 50.00 140 80 -0.00000  
 40.00 140 80 -0.00000  
 30.00 140 80 -0.00002  
 25.00 140 80 -0.00008  
 20.00 140 80 -0.00038  
 18.00 140 80 -0.00080  
 16.00 140 80 -0.00187  
 14.00 140 80 -0.00508  
 13.00 140 80 -0.00910  
 12.00 140 80 -0.01787  
 11.00 140 80 -0.03996  
 10.50 140 80 -0.06333  
 10.00 140 80 -0.10422  
 9.75 140 80 -0.13539  
 9.50 140 80 -0.17711  
 9.25 140 80 -0.23302  
 9.00 140 80 -0.30794  
 8.75 140 80 -0.40819  
 8.50 140 80 -0.54203  
 8.25 140 80 -0.72007  
 8.00 140 80 -0.95597  
 7.75 140 80 -1.26711  
 7.50 140 80 -1.67567

7.25 140 80 -2.21006  
7.00 140 80 -2.90715  
6.75 140 80 -3.81567  
6.50 140 80 -5.00169  
6.25 140 80 -6.55673  
6.00 140 80 -8.60871  
5.75 140 80 -11.33365  
5.50 140 80 -14.95876  
5.25 140 80 -19.73011  
5.00 140 80 -25.77652  
4.75 140 80 -32.70792  
4.50 140 80 -38.58712  
4.25 140 80 -37.50523  
4.00 140 80 -14.20173  
3.75 140 80 67.21828  
3.50 140 80 285.46779  
3.25 140 80 801.96847  
3.00 140 80 1922.47836  
2.75 140 80 4163.24804  
2.50 140 80 7524.50562  
2.25 140 80 8990.64937  
100.00 140 90 -0.00000  
50.00 140 90 -0.00000  
40.00 140 90 -0.00000  
30.00 140 90 -0.00002  
25.00 140 90 -0.00008  
20.00 140 90 -0.00036  
18.00 140 90 -0.00076  
16.00 140 90 -0.00178  
14.00 140 90 -0.00478  
13.00 140 90 -0.00849  
12.00 140 90 -0.01630  
11.00 140 90 -0.03508  
10.50 140 90 -0.05426  
10.00 140 90 -0.08712  
9.75 140 90 -0.11186  
9.50 140 90 -0.14480  
9.25 140 90 -0.18879  
9.00 140 90 -0.24764  
8.75 140 90 -0.32646  
8.50 140 90 -0.43199  
8.25 140 90 -0.57313  
8.00 140 90 -0.76155  
7.75 140 90 -1.01251  
7.50 140 90 -1.34597  
7.25 140 90 -1.78811  
7.00 140 90 -2.37356  
6.75 140 90 -3.14870  
6.50 140 90 -4.17671  
6.25 140 90 -5.54482  
6.00 140 90 -7.37438  
5.75 140 90 -9.83204  
5.50 140 90 -13.13565  
5.25 140 90 -17.53377  
5.00 140 90 -23.20366  
4.75 140 90 -29.93302  
4.50 140 90 -36.27673  
4.25 140 90 -37.51555  
4.00 140 90 -21.02278  
3.75 140 90 43.67103  
3.50 140 90 224.88610  
3.25 140 90 665.73160  
3.00 140 90 1642.66034  
2.75 140 90 3629.20141  
2.50 140 90 6975.82620  
2.25 140 90 8807.61789  
100.00 140 100 -0.00000  
50.00 140 100 -0.00000  
40.00 140 100 -0.00000  
30.00 140 100 -0.00002  
25.00 140 100 -0.00008  
20.00 140 100 -0.00037  
18.00 140 100 -0.00078  
16.00 140 100 -0.00181  
14.00 140 100 -0.00482  
13.00 140 100 -0.00845  
12.00 140 100 -0.01588  
11.00 140 100 -0.03293  
10.50 140 100 -0.04969  
10.00 140 100 -0.07768  
9.75 140 100 -0.09843  
9.50 140 100 -0.12581  
9.25 140 100 -0.16214  
9.00 140 100 -0.21054  
8.75 140 100 -0.27526  
8.50 140 100 -0.36203  
8.25 140 100 -0.47853  
8.00 140 100 -0.63512  
7.75 140 100 -0.84571  
7.50 140 100 -1.12898  
7.25 140 100 -1.51014  
7.00 140 100 -2.02340  
6.75 140 100 -2.71547  
6.50 140 100 -3.65068  
6.25 140 100 -4.91814  
6.00 140 100 -6.64097  
5.75 140 100 -8.98625  
5.50 140 100 -12.16917  
5.25 140 100 -16.43268  
5.00 140 100 -21.95332  
4.75 140 100 -28.55500  
4.50 140 100 -34.96046  
4.25 140 100 -36.99004

4.00 140 100 -23.46884  
3.75 140 100 32.63493  
3.50 140 100 192.44431  
3.25 140 100 586.18988  
3.00 140 100 1473.05246  
2.75 140 100 3321.39518  
2.50 140 100 6680.65803  
2.25 140 100 8788.33294  
100.00 140 110 -0.00000  
50.00 140 110 -0.00000  
40.00 140 110 -0.00000  
30.00 140 110 -0.00003  
25.00 140 110 -0.00010  
20.00 140 110 -0.00043  
18.00 140 110 -0.00088  
16.00 140 110 -0.00202  
14.00 140 110 -0.00528  
13.00 140 110 -0.00915  
12.00 140 110 -0.01689  
11.00 140 110 -0.03395  
10.50 140 110 -0.05014  
10.00 140 110 -0.07649  
9.75 140 110 -0.09570  
9.50 140 110 -0.12081  
9.25 140 110 -0.15387  
9.00 140 110 -0.19769  
8.75 140 110 -0.25611  
8.50 140 110 -0.33445  
8.25 140 110 -0.43997  
8.00 140 110 -0.58267  
7.75 140 110 -0.77635  
7.50 140 110 -1.03998  
7.25 140 110 -1.39982  
7.00 140 110 -1.89217  
6.75 140 110 -2.56746  
6.50 140 110 -3.49571  
6.25 140 110 -4.77404  
6.00 140 110 -6.53600  
5.75 140 110 -8.96129  
5.50 140 110 -12.28039  
5.25 140 110 -16.75833  
5.00 140 110 -22.61816  
4.75 140 110 -29.81084  
4.50 140 110 -37.42253  
4.25 140 110 -42.26409  
4.00 140 110 -35.67867  
3.75 140 110 3.42685  
3.50 140 110 123.31594  
3.25 140 110 429.42121  
3.00 140 110 1142.06384  
2.75 140 110 2698.10428  
2.50 140 110 5887.45021  
2.25 140 110 8679.74635  
100.00 140 120 -0.00000  
50.00 140 120 -0.00000  
40.00 140 120 -0.00001  
30.00 140 120 -0.00004  
25.00 140 120 -0.00012  
20.00 140 120 -0.00053  
18.00 140 120 -0.00108  
16.00 140 120 -0.00244  
14.00 140 120 -0.00630  
13.00 140 120 -0.01083  
12.00 140 120 -0.01975  
11.00 140 120 -0.03892  
10.50 140 120 -0.05673  
10.00 140 120 -0.08525  
9.75 140 120 -0.10585  
9.50 140 120 -0.13263  
9.25 140 120 -0.16776  
9.00 140 120 -0.21427  
8.75 140 120 -0.27636  
8.50 140 120 -0.35994  
8.25 140 120 -0.47323  
8.00 140 120 -0.62778  
7.75 140 120 -0.83976  
7.50 140 120 -1.13183  
7.25 140 120 -1.53561  
7.00 140 120 -2.09519  
6.75 140 120 -2.87173  
6.50 140 120 -3.94967  
6.25 140 120 -5.44454  
6.00 140 120 -7.51220  
5.75 140 120 -10.35786  
5.50 140 120 -14.23969  
5.25 140 120 -19.45363  
5.00 140 120 -26.26744  
4.75 140 120 -34.73223  
4.50 140 120 -44.21601  
4.25 140 120 -52.33009  
4.00 140 120 -52.55467  
3.75 140 120 -29.08516  
3.50 140 120 54.31850  
3.25 140 120 278.62543  
3.00 140 120 822.99008  
2.75 140 120 2083.48994  
2.50 140 120 4940.94993  
2.25 140 120 8528.17447  
100.00 140 130 -0.00000  
50.00 140 130 -0.00000  
40.00 140 130 -0.00001  
30.00 140 130 -0.00005  
25.00 140 130 -0.00015

20.00 140 130 -0.00067  
 18.00 140 130 -0.00137  
 16.00 140 130 -0.00310  
 14.00 140 130 -0.00798  
 13.00 140 130 -0.01371  
 12.00 140 130 -0.02495  
 11.00 140 130 -0.04905  
 10.50 140 130 -0.07143  
 10.00 140 130 -0.10743  
 9.75 140 130 -0.13358  
 9.50 140 130 -0.16778  
 9.25 140 130 -0.21302  
 9.00 140 130 -0.27350  
 8.75 140 130 -0.35517  
 8.50 140 130 -0.46647  
 8.25 140 130 -0.61934  
 8.00 140 130 -0.83066  
 7.75 140 130 -1.12412  
 7.50 140 130 -1.53280  
 7.25 140 130 -2.10250  
 7.00 140 130 -2.89593  
 6.75 140 130 -3.99794  
 6.50 140 130 -5.52144  
 6.25 140 130 -7.61344  
 6.00 140 130 -10.45911  
 5.75 140 130 -14.27864  
 5.50 140 130 -19.30487  
 5.25 140 130 -25.71545  
 5.00 140 130 -33.46494  
 4.75 140 130 -41.91078  
 4.50 140 130 -49.03473  
 4.25 140 130 -49.90044  
 4.00 140 130 -33.68616  
 3.75 140 130 22.01775  
 3.50 140 130 162.56463  
 3.25 140 130 480.46894  
 3.00 140 130 1171.29738  
 2.75 140 130 2671.21060  
 2.50 140 130 5976.69780  
 2.25 140 130 8884.56556  
 100.00 140 140 -0.00000  
 50.00 140 140 -0.00000  
 40.00 140 140 -0.00001  
 30.00 140 140 -0.00006  
 25.00 140 140 -0.00020  
 20.00 140 140 -0.00086  
 18.00 140 140 -0.00176  
 16.00 140 140 -0.00398  
 14.00 140 140 -0.01033  
 13.00 140 140 -0.01784  
 12.00 140 140 -0.03276  
 11.00 140 140 -0.06541  
 10.50 140 140 -0.09646  
 10.00 140 140 -0.14768  
 9.75 140 140 -0.18573  
 9.50 140 140 -0.23641  
 9.25 140 140 -0.30470  
 9.00 140 140 -0.39777  
 8.75 140 140 -0.52584  
 8.50 140 140 -0.70348  
 8.25 140 140 -0.95130  
 8.00 140 140 -1.29819  
 7.75 140 140 -1.78422  
 7.50 140 140 -2.46406  
 7.25 140 140 -3.41097  
 7.00 140 140 -4.72074  
 6.75 140 140 -6.51425  
 6.50 140 140 -8.93578  
 6.25 140 140 -12.13975  
 6.00 140 140 -16.25001  
 5.75 140 140 -21.25648  
 5.50 140 140 -26.77686  
 5.25 140 140 -31.54404  
 5.00 140 140 -32.37519  
 4.75 140 140 -22.24632  
 4.50 140 140 13.00952  
 4.25 140 140 99.84034  
 4.00 140 140 284.23994  
 3.75 140 140 641.62081  
 3.50 140 140 1292.16360  
 3.25 140 140 2432.63378  
 3.00 140 140 4413.58871  
 2.75 140 140 7365.76649  
 2.50 140 140 8965.10684  
 2.25 140 140 9549.71893  
 100.00 140 150 -0.00000  
 50.00 140 150 -0.00000  
 40.00 140 150 -0.00001  
 30.00 140 150 -0.00007  
 25.00 140 150 -0.00024  
 20.00 140 150 -0.00106  
 18.00 140 150 -0.00218  
 16.00 140 150 -0.00499  
 14.00 140 150 -0.01315  
 13.00 140 150 -0.02295  
 12.00 140 150 -0.04282  
 11.00 140 150 -0.08787  
 10.50 140 150 -0.13242  
 10.00 140 150 -0.20871  
 9.75 140 150 -0.26712  
 9.50 140 150 -0.34660  
 9.25 140 150 -0.45600  
 9.00 140 150 -0.60807

8.75 140 150 -0.82103  
8.50 140 150 -1.12074  
8.25 140 150 -1.54336  
8.00 140 150 -2.13873  
7.75 140 150 -2.97404  
7.50 140 150 -4.13725  
7.25 140 150 -5.73865  
7.00 140 150 -7.90655  
6.75 140 150 -10.76768  
6.50 140 150 -14.38982  
6.25 140 150 -18.63428  
6.00 140 150 -22.79933  
5.75 140 150 -24.79989  
5.50 140 150 -19.37343  
5.25 140 150 5.60781  
5.00 140 150 76.12403  
4.75 140 150 243.81548  
4.50 140 150 602.67414  
4.25 140 150 1305.77427  
4.00 140 150 2568.90207  
3.75 140 150 4646.39873  
3.50 140 150 7294.98562  
3.25 140 150 8698.34646  
3.00 140 150 9288.35349  
2.75 140 150 9590.04745  
2.50 140 150 9762.33726  
2.25 140 150 9858.55947  
100.00 140 160 -0.00000  
50.00 140 160 -0.00000  
40.00 140 160 -0.00001  
30.00 140 160 -0.00008  
25.00 140 160 -0.00028  
20.00 140 160 -0.00125  
18.00 140 160 -0.00258  
16.00 140 160 -0.00596  
14.00 140 160 -0.01595  
13.00 140 160 -0.02818  
12.00 140 160 -0.05352  
11.00 140 160 -0.11325  
10.50 140 160 -0.17478  
10.00 140 160 -0.28401  
9.75 140 160 -0.36990  
9.50 140 160 -0.48888  
9.25 140 160 -0.65539  
9.00 140 160 -0.89017  
8.75 140 160 -1.22276  
8.50 140 160 -1.69464  
8.25 140 160 -2.36296  
8.00 140 160 -3.30446  
7.75 140 160 -4.61836  
7.50 140 160 -6.42528  
7.25 140 160 -8.85446  
7.00 140 160 -12.00042  
6.75 140 160 -15.80117  
6.50 140 160 -19.71963  
6.25 140 160 -21.94167  
6.00 140 160 -17.42451  
5.75 140 160 6.67247  
5.50 140 160 81.16154  
5.25 140 160 275.96013  
5.00 140 160 739.60335  
4.75 140 160 1760.62633  
4.50 140 160 3828.12213  
4.25 140 160 7177.50501  
4.00 140 160 8867.92982  
3.75 140 160 9398.34396  
3.50 140 160 9642.68528  
3.25 140 160 9780.32834  
3.00 140 160 9862.06837  
2.75 140 160 9912.25014  
2.50 140 160 9943.71174  
2.25 140 160 9963.70255  
100.00 140 170 -0.00000  
50.00 140 170 -0.00000  
40.00 140 170 -0.00001  
30.00 140 170 -0.00009  
25.00 140 170 -0.00031  
20.00 140 170 -0.00138  
18.00 140 170 -0.00287  
16.00 140 170 -0.00668  
14.00 140 170 -0.01807  
13.00 140 170 -0.03220  
12.00 140 170 -0.06201  
11.00 140 170 -0.13441  
10.50 140 170 -0.21122  
10.00 140 170 -0.35103  
9.75 140 170 -0.46288  
9.50 140 170 -0.61956  
9.25 140 170 -0.84093  
9.00 140 170 -1.15551  
8.75 140 170 -1.60368  
8.50 140 170 -2.24157  
8.25 140 170 -3.14533  
8.00 140 170 -4.41444  
7.75 140 170 -6.17111  
7.50 140 170 -8.54765  
7.25 140 170 -11.64080  
7.00 140 170 -15.37818  
6.75 140 170 -19.15434  
6.50 140 170 -20.86998  
6.25 140 170 -14.45973  
6.00 140 170 16.29560  
5.75 140 170 112.70679

5.50 140 170 375.44609  
5.25 140 170 1037.10874  
5.00 140 170 2594.48034  
4.75 140 170 5942.98264  
4.50 140 170 8711.99564  
4.25 140 170 9435.14176  
4.00 140 170 9713.48450  
3.75 140 170 9847.24435  
3.50 140 170 9916.39983  
3.25 140 170 9953.59659  
3.00 140 170 9974.04227  
2.75 140 170 9985.41653  
2.50 140 170 9991.78691  
2.25 140 170 9995.36827  
100.00 140 180 -0.00000  
50.00 140 180 -0.00000  
40.00 140 180 -0.00002  
30.00 140 180 -0.00010  
25.00 140 180 -0.00032  
20.00 140 180 -0.00143  
18.00 140 180 -0.00298  
16.00 140 180 -0.00694  
14.00 140 180 -0.01887  
13.00 140 180 -0.03373  
12.00 140 180 -0.06528  
11.00 140 180 -0.14278  
10.50 140 180 -0.22589  
10.00 140 180 -0.37850  
9.75 140 180 -0.50131  
9.50 140 180 -0.67397  
9.25 140 180 -0.91867  
9.00 140 180 -1.26723  
8.75 140 180 -1.76460  
8.50 140 180 -2.47301  
8.25 140 180 -3.47627  
8.00 140 180 -4.88244  
7.75 140 180 -6.82073  
7.50 140 180 -9.42105  
7.25 140 180 -12.74621  
7.00 140 180 -16.59703  
6.75 140 180 -19.97982  
6.50 140 180 -19.68929  
6.25 140 180 -6.61997  
6.00 140 180 43.58607  
5.75 140 180 193.43309  
5.50 140 180 596.76760  
5.25 140 180 1611.87193  
5.00 140 180 4000.39471  
4.75 140 180 7900.61029  
4.50 140 180 9253.37450  
4.25 140 180 9651.45982  
4.00 140 180 9825.25986  
3.75 140 180 9909.24976  
3.50 140 180 9952.01248  
3.25 140 180 9974.38445  
3.00 140 180 9986.25794  
2.75 140 180 9992.60801  
2.50 140 180 9996.01806  
2.25 140 180 9997.85334  
100.00 150 0 -0.00000  
50.00 150 0 -0.00000  
40.00 150 0 -0.00001  
30.00 150 0 -0.00006  
25.00 150 0 -0.00019  
20.00 150 0 -0.00080  
18.00 150 0 -0.00163  
16.00 150 0 -0.00374  
14.00 150 0 -0.01036  
13.00 150 0 -0.01937  
12.00 150 0 -0.04112  
11.00 150 0 -0.10290  
10.50 150 0 -0.17313  
10.00 150 0 -0.30114  
9.75 150 0 -0.40096  
9.50 150 0 -0.53638  
9.25 150 0 -0.72011  
9.00 150 0 -0.96931  
8.75 150 0 -1.30728  
8.50 150 0 -1.76604  
8.25 150 0 -2.39025  
8.00 150 0 -3.24338  
7.75 150 0 -4.41703  
7.50 150 0 -6.04342  
7.25 150 0 -8.30692  
7.00 150 0 -11.43608  
6.75 150 0 -15.61641  
6.50 150 0 -20.65429  
6.25 150 0 -24.94782  
6.00 150 0 -22.66597  
5.75 150 0 3.45008  
5.50 150 0 99.48087  
5.25 150 0 380.41160  
5.00 150 0 1118.53187  
4.75 150 0 2931.14102  
4.50 150 0 6911.09834  
4.25 150 0 9182.15976  
4.00 150 0 9719.58977  
3.75 150 0 9891.57014  
3.50 150 0 9956.13496  
3.25 150 0 9981.93370  
3.00 150 0 9992.50458  
2.75 150 0 9996.88086  
2.50 150 0 9998.70037

2.25 150 0 9999.45821  
 100.00 150 10 -0.00000  
 50.00 150 10 -0.00000  
 40.00 150 10 -0.00001  
 30.00 150 10 -0.00006  
 25.00 150 10 -0.00019  
 20.00 150 10 -0.00079  
 18.00 150 10 -0.00160  
 16.00 150 10 -0.00369  
 14.00 150 10 -0.01021  
 13.00 150 10 -0.01909  
 12.00 150 10 -0.04054  
 11.00 150 10 -0.10153  
 10.50 150 10 -0.17083  
 10.00 150 10 -0.29697  
 9.75 150 10 -0.39514  
 9.50 150 10 -0.52809  
 9.25 150 10 -0.70799  
 9.00 150 10 -0.95120  
 8.75 150 10 -1.27964  
 8.50 150 10 -1.72303  
 8.25 150 10 -2.32222  
 8.00 150 10 -3.13442  
 7.75 150 10 -4.24130  
 7.50 150 10 -5.76064  
 7.25 150 10 -7.85962  
 7.00 150 10 -10.75919  
 6.75 150 10 -14.69251  
 6.50 150 10 -19.71039  
 6.25 150 10 -25.05324  
 6.00 150 10 -27.40456  
 5.75 150 10 -16.45257  
 5.50 150 10 35.64678  
 5.25 150 10 197.80024  
 5.00 150 10 629.32210  
 4.75 150 10 1676.21281  
 4.50 150 10 4043.16494  
 4.25 150 10 7890.08325  
 4.00 150 10 9307.68161  
 3.75 150 10 9720.40003  
 3.50 150 10 9876.86868  
 3.25 150 10 9943.71715  
 3.00 150 10 9973.83919  
 2.75 150 10 9987.74611  
 2.50 150 10 9994.23953  
 2.25 150 10 9997.28747  
 100.00 150 20 -0.00000  
 50.00 150 20 -0.00000  
 40.00 150 20 -0.00001  
 30.00 150 20 -0.00006  
 25.00 150 20 -0.00018  
 20.00 150 20 -0.00075  
 18.00 150 20 -0.00154  
 16.00 150 20 -0.00355  
 14.00 150 20 -0.00979  
 13.00 150 20 -0.01830  
 12.00 150 20 -0.03891  
 11.00 150 20 -0.09765  
 10.50 150 20 -0.16439  
 10.00 150 20 -0.28551  
 9.75 150 20 -0.37945  
 9.50 150 20 -0.50615  
 9.25 150 20 -0.67671  
 9.00 150 20 -0.90573  
 8.75 150 20 -1.21227  
 8.50 150 20 -1.62140  
 8.25 150 20 -2.16630  
 8.00 150 20 -2.89172  
 7.75 150 20 -3.85943  
 7.50 150 20 -5.15714  
 7.25 150 20 -6.91166  
 7.00 150 20 -9.30585  
 6.75 150 20 -12.59142  
 6.50 150 20 -17.06947  
 6.25 150 20 -22.95927  
 6.00 150 20 -29.95673  
 5.75 150 20 -36.03105  
 5.50 150 20 -34.50580  
 5.25 150 20 -7.55644  
 5.00 150 20 87.26913  
 4.75 150 20 343.23334  
 4.50 150 20 952.52923  
 4.25 150 20 2292.00447  
 4.00 150 20 5078.69756  
 3.75 150 20 8372.50082  
 3.50 150 20 9400.68250  
 3.25 150 20 9736.33085  
 3.00 150 20 9875.17839  
 2.75 150 20 9939.03443  
 2.50 150 20 9969.77240  
 2.25 150 20 9984.90164  
 100.00 150 30 -0.00000  
 50.00 150 30 -0.00000  
 40.00 150 30 -0.00001  
 30.00 150 30 -0.00005  
 25.00 150 30 -0.00016  
 20.00 150 30 -0.00071  
 18.00 150 30 -0.00144  
 16.00 150 30 -0.00332  
 14.00 150 30 -0.00917  
 13.00 150 30 -0.01712  
 12.00 150 30 -0.03643  
 11.00 150 30 -0.09161

10.50 150 30 -0.15435  
10.00 150 30 -0.26802  
9.75 150 30 -0.35594  
9.50 150 30 -0.47420  
9.25 150 30 -0.63280  
9.00 150 30 -0.84467  
8.75 150 30 -1.12642  
8.50 150 30 -1.49927  
8.25 150 30 -1.99043  
8.00 150 30 -2.63520  
7.75 150 30 -3.48054  
7.50 150 30 -4.59109  
7.25 150 30 -6.05936  
7.00 150 30 -8.02182  
6.75 150 30 -10.68123  
6.50 150 30 -14.32944  
6.25 150 30 -19.34618  
6.00 150 30 -26.10241  
5.75 150 30 -34.58631  
5.50 150 30 -43.32707  
5.25 150 30 -46.67394  
5.00 150 30 -28.39630  
4.75 150 30 52.76299  
4.50 150 30 295.01298  
4.25 150 30 923.03751  
4.00 150 30 2434.38323  
3.75 150 30 5857.21728  
3.50 150 30 8829.08399  
3.25 150 30 9555.76811  
3.00 150 30 9787.03706  
2.75 150 30 9890.63875  
2.50 150 30 9942.58945  
2.25 150 30 9969.51526  
100.00 150 40 -0.00000  
50.00 150 40 -0.00000  
40.00 150 40 -0.00001  
30.00 150 40 -0.00005  
25.00 150 40 -0.00015  
20.00 150 40 -0.00064  
18.00 150 40 -0.00132  
16.00 150 40 -0.00305  
14.00 150 40 -0.00841  
13.00 150 40 -0.01567  
12.00 150 40 -0.03328  
11.00 150 40 -0.08356  
10.50 150 40 -0.14071  
10.00 150 40 -0.24419  
9.75 150 40 -0.32417  
9.50 150 40 -0.43165  
9.25 150 40 -0.57564  
9.00 150 40 -0.76772  
8.75 150 40 -1.02263  
8.50 150 40 -1.35910  
8.25 150 40 -1.80079  
8.00 150 40 -2.37800  
7.75 150 40 -3.13022  
7.50 150 40 -4.11078  
7.25 150 40 -5.39457  
7.00 150 40 -7.09010  
6.75 150 40 -9.35564  
6.50 150 40 -12.41207  
6.25 150 40 -16.52608  
6.00 150 40 -21.88691  
5.75 150 40 -28.18255  
5.50 150 40 -33.42419  
5.25 150 40 -31.03303  
5.00 150 40 -3.13265  
4.75 150 40 94.11911  
4.50 150 40 361.49077  
4.25 150 40 1020.28985  
4.00 150 40 2537.80325  
3.75 150 40 5828.90057  
3.50 150 40 8740.85326  
3.25 150 40 9502.14198  
3.00 150 40 9750.79474  
2.75 150 40 9865.85790  
2.50 150 40 9926.13574  
2.25 150 40 9958.82195  
100.00 150 50 -0.00000  
50.00 150 50 -0.00000  
40.00 150 50 -0.00001  
30.00 150 50 -0.00004  
25.00 150 50 -0.00013  
20.00 150 50 -0.00058  
18.00 150 50 -0.00119  
16.00 150 50 -0.00275  
14.00 150 50 -0.00758  
13.00 150 50 -0.01408  
12.00 150 50 -0.02967  
11.00 150 50 -0.07380  
10.50 150 50 -0.12375  
10.00 150 50 -0.21407  
9.75 150 50 -0.28385  
9.50 150 50 -0.37766  
9.25 150 50 -0.50339  
9.00 150 50 -0.67121  
8.75 150 50 -0.89413  
8.50 150 50 -1.18860  
8.25 150 50 -1.57544  
8.00 150 50 -2.08115  
7.75 150 50 -2.73992  
7.50 150 50 -3.59726  
7.25 150 50 -4.71587

7.00 150 50 -6.18471  
6.75 150 50 -8.13087  
6.50 150 50 -10.72798  
6.25 150 50 -14.17946  
6.00 150 50 -18.61466  
5.75 150 50 -23.74370  
5.50 150 50 -27.92054  
5.25 150 50 -25.87236  
5.00 150 50 -3.62060  
4.75 150 50 72.19896  
4.50 150 50 275.74663  
4.25 150 50 763.36072  
4.00 150 50 1850.34032  
3.75 150 50 4140.22556  
3.50 150 50 7731.57276  
3.25 150 50 9172.10151  
3.00 150 50 9599.33745  
2.75 150 50 9771.84669  
2.50 150 50 9865.66332  
2.25 150 50 9919.57840  
100.00 150 60 -0.00000  
50.00 150 60 -0.00000  
40.00 150 60 -0.00001  
30.00 150 60 -0.00003  
25.00 150 60 -0.00011  
20.00 150 60 -0.00051  
18.00 150 60 -0.00106  
16.00 150 60 -0.00246  
14.00 150 60 -0.00676  
13.00 150 60 -0.01247  
12.00 150 60 -0.02591  
11.00 150 60 -0.06320  
10.50 150 60 -0.10498  
10.00 150 60 -0.18020  
9.75 150 60 -0.23826  
9.50 150 60 -0.31631  
9.25 150 60 -0.42100  
9.00 150 60 -0.56094  
8.75 150 60 -0.74717  
8.50 150 60 -0.99372  
8.25 150 60 -1.31834  
8.00 150 60 -1.74348  
7.75 150 60 -2.29778  
7.50 150 60 -3.01851  
7.25 150 60 -3.95563  
7.00 150 60 -5.17817  
6.75 150 60 -6.78358  
6.50 150 60 -8.90800  
6.25 150 60 -11.72875  
6.00 150 60 -15.43216  
5.75 150 60 -20.07720  
5.50 150 60 -25.19551  
5.25 150 60 -28.79004  
5.00 150 60 -25.06555  
4.75 150 60 0.35241  
4.50 150 60 79.93462  
4.25 150 60 282.37352  
4.00 150 60 745.70401  
3.75 150 60 1733.81310  
3.50 150 60 3717.44895  
3.25 150 60 7080.13484  
3.00 150 60 8894.49797  
2.75 150 60 9452.26814  
2.50 150 60 9674.22401  
2.25 150 60 9797.23415  
100.00 150 70 -0.00000  
50.00 150 70 -0.00000  
40.00 150 70 -0.00000  
30.00 150 70 -0.00003  
25.00 150 70 -0.00010  
20.00 150 70 -0.00045  
18.00 150 70 -0.00093  
16.00 150 70 -0.00219  
14.00 150 70 -0.00602  
13.00 150 70 -0.01100  
12.00 150 70 -0.02242  
11.00 150 70 -0.05310  
10.50 150 70 -0.08684  
10.00 150 70 -0.14712  
9.75 150 70 -0.19349  
9.50 150 70 -0.25580  
9.25 150 70 -0.33940  
9.00 150 70 -0.45133  
8.75 150 70 -0.60067  
8.50 150 70 -0.79904  
8.25 150 70 -1.06124  
8.00 150 70 -1.40602  
7.75 150 70 -1.85715  
7.50 150 70 -2.44510  
7.25 150 70 -3.20968  
7.00 150 70 -4.20436  
6.75 150 70 -5.50308  
6.50 150 70 -7.21010  
6.25 150 70 -9.47188  
6.00 150 70 -12.48450  
5.75 150 70 -16.47742  
5.50 150 70 -21.62348  
5.25 150 70 -27.76168  
5.00 150 70 -33.69077  
4.75 150 70 -35.54235  
4.50 150 70 -23.26566  
4.25 150 70 26.65086  
4.00 150 70 165.75123

3.75 150 70 501.60230  
3.50 150 70 1247.59206  
3.25 150 70 2798.11741  
3.00 150 70 5784.85062  
2.75 150 70 8469.84638  
2.50 150 70 9300.32256  
2.25 150 70 9582.31904  
100.00 150 80 -0.00000  
50.00 150 80 -0.00000  
40.00 150 80 -0.00000  
30.00 150 80 -0.00003  
25.00 150 80 -0.00009  
20.00 150 80 -0.00040  
18.00 150 80 -0.00084  
16.00 150 80 -0.00197  
14.00 150 80 -0.00542  
13.00 150 80 -0.00981  
12.00 150 80 -0.01956  
11.00 150 80 -0.04467  
10.50 150 80 -0.07159  
10.00 150 80 -0.11901  
9.75 150 80 -0.15527  
9.50 150 80 -0.20388  
9.25 150 80 -0.26909  
9.00 150 80 -0.35649  
8.75 150 80 -0.47343  
8.50 150 80 -0.62945  
8.25 150 80 -0.83689  
8.00 150 80 -1.11157  
7.75 150 80 -1.47383  
7.50 150 80 -1.94989  
7.25 150 80 -2.57396  
7.00 150 80 -3.39153  
6.75 150 80 -4.46466  
6.50 150 80 -5.88018  
6.25 150 80 -7.76159  
6.00 150 80 -10.28414  
5.75 150 80 -13.68750  
5.50 150 80 -18.26759  
5.25 150 80 -24.29682  
5.00 150 80 -31.74728  
4.75 150 80 -39.52431  
4.50 150 80 -43.55257  
4.25 150 80 -32.28192  
4.00 150 80 23.38929  
3.75 150 80 191.65908  
3.50 150 80 622.85686  
3.25 150 80 1625.28275  
3.00 150 80 3763.28378  
2.75 150 80 7326.51881  
2.50 150 80 8959.77534  
2.25 150 80 9403.07352  
100.00 150 90 -0.00000  
50.00 150 90 -0.00000  
40.00 150 90 -0.00000  
30.00 150 90 -0.00002  
25.00 150 90 -0.00008  
20.00 150 90 -0.00037  
18.00 150 90 -0.00079  
16.00 150 90 -0.00185  
14.00 150 90 -0.00505  
13.00 150 90 -0.00905  
12.00 150 90 -0.01762  
11.00 150 90 -0.03868  
10.50 150 90 -0.06051  
10.00 150 90 -0.09825  
9.75 150 90 -0.12681  
9.50 150 90 -0.16494  
9.25 150 90 -0.21595  
9.00 150 90 -0.28433  
8.75 150 90 -0.37600  
8.50 150 90 -0.49884  
8.25 150 90 -0.66325  
8.00 150 90 -0.88290  
7.75 150 90 -1.17577  
7.50 150 90 -1.56562  
7.25 150 90 -2.08405  
7.00 150 90 -2.77368  
6.75 150 90 -3.69294  
6.50 150 90 -4.92330  
6.25 150 90 -6.57950  
6.00 150 90 -8.82246  
5.75 150 90 -11.87010  
5.50 150 90 -15.99002  
5.25 150 90 -21.42779  
5.00 150 90 -28.15273  
4.75 150 90 -35.13416  
4.50 150 90 -38.48042  
4.25 150 90 -26.92984  
4.00 150 90 28.61461  
3.75 150 90 198.40646  
3.50 150 90 643.02805  
3.25 150 90 1707.08595  
3.00 150 90 4059.73537  
2.75 150 90 7764.35441  
2.50 150 90 9154.86449  
2.25 150 90 9530.63178  
100.00 150 100 -0.00000  
50.00 150 100 -0.00000  
40.00 150 100 -0.00000  
30.00 150 100 -0.00002  
25.00 150 100 -0.00008  
20.00 150 100 -0.00038

18.00 150 100 -0.00079  
16.00 150 100 -0.00186  
14.00 150 100 -0.00500  
13.00 150 100 -0.00884  
12.00 150 100 -0.01684  
11.00 150 100 -0.03554  
10.50 150 100 -0.05420  
10.00 150 100 -0.08569  
9.75 150 100 -0.10919  
9.50 150 100 -0.14033  
9.25 150 100 -0.18178  
9.00 150 100 -0.23719  
8.75 150 100 -0.31149  
8.50 150 100 -0.41133  
8.25 150 100 -0.54570  
8.00 150 100 -0.72674  
7.75 150 100 -0.97085  
7.50 150 100 -1.30031  
7.25 150 100 -1.74554  
7.00 150 100 -2.34843  
6.75 150 100 -3.16723  
6.50 150 100 -4.28352  
6.25 150 100 -5.81149  
6.00 150 100 -7.90864  
5.75 150 100 -10.78215  
5.50 150 100 -14.67374  
5.25 150 100 -19.77567  
5.00 150 100 -25.95936  
4.75 150 100 -32.03404  
4.50 150 100 -33.88077  
4.25 150 100 -19.97709  
4.00 150 100 38.99746  
3.75 150 100 213.64296  
3.50 150 100 666.91988  
3.25 150 100 1757.44628  
3.00 150 100 4216.21670  
2.75 150 100 7980.62747  
2.50 150 100 9270.71478  
2.25 150 100 9628.97935  
100.00 150 110 -0.00000  
50.00 150 110 -0.00000  
40.00 150 110 -0.00000  
30.00 150 110 -0.00003  
25.00 150 110 -0.00009  
20.00 150 110 -0.00043  
18.00 150 110 -0.00088  
16.00 150 110 -0.00204  
14.00 150 110 -0.00538  
13.00 150 110 -0.00940  
12.00 150 110 -0.01752  
11.00 150 110 -0.03570  
10.50 150 110 -0.05319  
10.00 150 110 -0.08195  
9.75 150 110 -0.10307  
9.50 150 110 -0.13079  
9.25 150 110 -0.16744  
9.00 150 110 -0.21620  
8.75 150 110 -0.28146  
8.50 150 110 -0.36924  
8.25 150 110 -0.48786  
8.00 150 110 -0.64878  
7.75 150 110 -0.86790  
7.50 150 110 -1.16726  
7.25 150 110 -1.57764  
7.00 150 110 -2.14210  
6.75 150 110 -2.92113  
6.50 150 110 -3.99979  
6.25 150 110 -5.49688  
6.00 150 110 -7.57519  
5.75 150 110 -10.44790  
5.50 150 110 -14.36618  
5.25 150 110 -19.54913  
5.00 150 110 -25.96044  
4.75 150 110 -32.70956  
4.50 150 110 -36.57234  
4.25 150 110 -28.50449  
4.00 150 110 14.34670  
3.75 150 110 146.57239  
3.50 150 110 493.73424  
3.25 150 110 1333.92582  
3.00 150 110 3248.81492  
2.75 150 110 7013.52212  
2.50 150 110 9042.57536  
2.25 150 110 9573.98131  
100.00 150 120 -0.00000  
50.00 150 120 -0.00000  
40.00 150 120 -0.00001  
30.00 150 120 -0.00004  
25.00 150 120 -0.00012  
20.00 150 120 -0.00052  
18.00 150 120 -0.00107  
16.00 150 120 -0.00243  
14.00 150 120 -0.00634  
13.00 150 120 -0.01095  
12.00 150 120 -0.02009  
11.00 150 120 -0.03997  
10.50 150 120 -0.05862  
10.00 150 120 -0.08870  
9.75 150 120 -0.11053  
9.50 150 120 -0.13902  
9.25 150 120 -0.17652  
9.00 150 120 -0.22631  
8.75 150 120 -0.29299

8.50 150 120 -0.38295  
8.25 150 120 -0.50520  
8.00 150 120 -0.67234  
7.75 150 120 -0.90213  
7.50 150 120 -1.21951  
7.25 150 120 -1.65953  
7.00 150 120 -2.27136  
6.75 150 120 -3.12386  
6.50 150 120 -4.31285  
6.25 150 120 -5.97044  
6.00 150 120 -8.27532  
5.75 150 120 -11.46048  
5.50 150 120 -15.80771  
5.25 150 120 -21.60191  
5.00 150 120 -28.98135  
4.75 150 120 -37.54004  
4.50 150 120 -45.36733  
4.25 150 120 -46.84561  
4.00 150 120 -27.74180  
3.75 150 120 45.57855  
3.50 150 120 249.63231  
3.25 150 120 753.98536  
3.00 150 120 1923.47728  
2.75 150 120 4507.62852  
2.50 150 120 8179.55875  
2.25 150 120 9368.73728  
100.00 150 130 -0.00000  
50.00 150 130 -0.00000  
40.00 150 130 -0.00001  
30.00 150 130 -0.00005  
25.00 150 130 -0.00015  
20.00 150 130 -0.00067  
18.00 150 130 -0.00136  
16.00 150 130 -0.00308  
14.00 150 130 -0.00797  
13.00 150 130 -0.01372  
12.00 150 130 -0.02507  
11.00 150 130 -0.04957  
10.50 150 130 -0.07243  
10.00 150 130 -0.10935  
9.75 150 130 -0.13623  
9.50 150 130 -0.17146  
9.25 150 130 -0.21814  
9.00 150 130 -0.28062  
8.75 150 130 -0.36510  
8.50 150 130 -0.48036  
8.25 150 130 -0.63882  
8.00 150 130 -0.85805  
7.75 150 130 -1.16278  
7.50 150 130 -1.58760  
7.25 150 130 -2.18052  
7.00 150 130 -3.00760  
6.75 150 130 -4.15869  
6.50 150 130 -5.75416  
6.25 150 130 -7.95199  
6.00 150 130 -10.95290  
5.75 150 130 -14.99758  
5.50 150 130 -20.34172  
5.25 150 130 -27.17701  
5.00 150 130 -35.43078  
4.75 150 130 -44.30959  
4.50 150 130 -51.32799  
4.25 150 130 -50.33502  
4.00 150 130 -27.60392  
3.75 150 130 45.92275  
3.50 150 130 230.47748  
3.25 150 130 651.48525  
3.00 150 130 1576.31691  
2.75 150 130 3593.84654  
2.50 150 130 7430.17854  
2.25 150 130 9241.39107  
100.00 150 140 -0.00000  
50.00 150 140 -0.00000  
40.00 150 140 -0.00001  
30.00 150 140 -0.00006  
25.00 150 140 -0.00019  
20.00 150 140 -0.00085  
18.00 150 140 -0.00174  
16.00 150 140 -0.00395  
14.00 150 140 -0.01030  
13.00 150 140 -0.01781  
12.00 150 140 -0.03276  
11.00 150 140 -0.06558  
10.50 150 140 -0.09687  
10.00 150 140 -0.14856  
9.75 150 140 -0.18700  
9.50 150 140 -0.23822  
9.25 150 140 -0.30729  
9.00 150 140 -0.40145  
8.75 150 140 -0.53107  
8.50 150 140 -0.71090  
8.25 150 140 -0.96184  
8.00 150 140 -1.31318  
7.75 150 140 -1.80557  
7.50 150 140 -2.49455  
7.25 150 140 -3.45468  
7.00 150 140 -4.78362  
6.75 150 140 -6.60511  
6.50 150 140 -9.06767  
6.25 150 140 -12.33204  
6.00 150 140 -16.53122  
5.75 150 140 -21.66802  
5.50 150 140 -27.37697

5.25 150 140 -32.40998  
5.00 150 140 -33.59820  
4.75 150 140 -23.90675  
4.50 150 140 10.91418  
4.25 150 140 97.57092  
4.00 150 140 282.71468  
3.75 150 140 643.31213  
3.50 150 140 1303.19008  
3.25 150 140 2467.97246  
3.00 150 140 4510.91680  
2.75 150 140 7500.08293  
2.50 150 140 9030.71415  
2.25 150 140 9583.63404  
100.00 150 150 -0.00000  
50.00 150 150 -0.00000  
40.00 150 150 -0.00001  
30.00 150 150 -0.00007  
25.00 150 150 -0.00024  
20.00 150 150 -0.00106  
18.00 150 150 -0.00217  
16.00 150 150 -0.00497  
14.00 150 150 -0.01311  
13.00 150 150 -0.02290  
12.00 150 150 -0.04277  
11.00 150 150 -0.08787  
10.50 150 150 -0.13252  
10.00 150 150 -0.20901  
9.75 150 150 -0.26759  
9.50 150 150 -0.34732  
9.25 150 150 -0.45707  
9.00 150 150 -0.60965  
8.75 150 150 -0.82335  
8.50 150 150 -1.12411  
8.25 150 150 -1.54824  
8.00 150 150 -2.14579  
7.75 150 150 -2.98422  
7.50 150 150 -4.15195  
7.25 150 150 -5.75990  
7.00 150 150 -7.93733  
6.75 150 150 -10.81237  
6.50 150 150 -14.45494  
6.25 150 150 -18.72945  
6.00 150 150 -22.93882  
5.75 150 150 -25.00469  
5.50 150 150 -19.67399  
5.25 150 150 5.16818  
5.00 150 150 75.48543  
4.75 150 150 242.89758  
4.50 150 150 601.37127  
4.25 150 150 1303.94511  
4.00 150 150 2566.34559  
3.75 150 150 4642.82494  
3.50 150 150 7292.23935  
3.25 150 150 8697.48183  
3.00 150 150 9288.35303  
2.75 150 150 9590.59857  
2.50 150 150 9763.16254  
2.25 150 150 9859.33855  
100.00 150 160 -0.00000  
50.00 150 160 -0.00000  
40.00 150 160 -0.00001  
30.00 150 160 -0.00008  
25.00 150 160 -0.00028  
20.00 150 160 -0.00124  
18.00 150 160 -0.00258  
16.00 150 160 -0.00595  
14.00 150 160 -0.01593  
13.00 150 160 -0.02815  
12.00 150 160 -0.05348  
11.00 150 160 -0.11322  
10.50 150 160 -0.17477  
10.00 150 160 -0.28406  
9.75 150 160 -0.37001  
9.50 150 160 -0.48909  
9.25 150 160 -0.65573  
9.00 150 160 -0.89070  
8.75 150 160 -1.22356  
8.50 150 160 -1.69585  
8.25 150 160 -2.36477  
8.00 150 160 -3.30712  
7.75 150 160 -4.62227  
7.50 150 160 -6.43100  
7.25 150 160 -8.86281  
7.00 150 160 -12.01259  
6.75 150 160 -15.81892  
6.50 150 160 -19.74549  
6.25 150 160 -21.97927  
6.00 150 160 -17.47886  
5.75 150 160 6.59478  
5.50 150 160 81.05288  
5.25 150 160 275.81373  
5.00 150 160 739.41768  
4.75 150 160 1760.41001  
4.50 150 160 3827.88450  
4.25 150 160 7177.30852  
4.00 150 160 8867.82864  
3.75 150 160 9398.25512  
3.50 150 160 9642.61916  
3.25 150 160 9780.27961  
3.00 150 160 9862.03263  
2.75 150 160 9912.22404  
2.50 150 160 9943.69280  
2.25 150 160 9963.68890

100.00 150 170 -0.00000  
50.00 150 170 -0.00000  
40.00 150 170 -0.00001  
30.00 150 170 -0.00009  
25.00 150 170 -0.00031  
20.00 150 170 -0.00138  
18.00 150 170 -0.00287  
16.00 150 170 -0.00668  
14.00 150 170 -0.01807  
13.00 150 170 -0.03219  
12.00 150 170 -0.06200  
11.00 150 170 -0.13439  
10.50 150 170 -0.21121  
10.00 150 170 -0.35103  
9.75 150 170 -0.46290  
9.50 150 170 -0.61960  
9.25 150 170 -0.84100  
9.00 150 170 -1.15562  
8.75 150 170 -1.60385  
8.50 150 170 -2.24185  
8.25 150 170 -3.14575  
8.00 150 170 -4.41506  
7.75 150 170 -6.17204  
7.50 150 170 -8.54902  
7.25 150 170 -11.64280  
7.00 150 170 -15.38108  
6.75 150 170 -19.15847  
6.50 150 170 -20.87573  
6.25 150 170 -14.46736  
6.00 150 170 16.28655  
5.75 150 170 112.69911  
5.50 150 170 375.44906  
5.25 150 170 1037.14764  
5.00 150 170 2594.61446  
4.75 150 170 5943.29483  
4.50 150 170 8712.09850  
4.25 150 170 9435.17321  
4.00 150 170 9713.49941  
3.75 150 170 9847.25210  
3.50 150 170 9916.40407  
3.25 150 170 9953.59897  
3.00 150 170 9974.04363  
2.75 150 170 9985.41731  
2.50 150 170 9991.78736  
2.25 150 170 9995.36853  
100.00 150 180 -0.00000  
50.00 150 180 -0.00000  
40.00 150 180 -0.00002  
30.00 150 180 -0.00010  
25.00 150 180 -0.00032  
20.00 150 180 -0.00143  
18.00 150 180 -0.00298  
16.00 150 180 -0.00694  
14.00 150 180 -0.01887  
13.00 150 180 -0.03373  
12.00 150 180 -0.06528  
11.00 150 180 -0.14278  
10.50 150 180 -0.22589  
10.00 150 180 -0.37850  
9.75 150 180 -0.50131  
9.50 150 180 -0.67397  
9.25 150 180 -0.91867  
9.00 150 180 -1.26723  
8.75 150 180 -1.76460  
8.50 150 180 -2.47301  
8.25 150 180 -3.47627  
8.00 150 180 -4.88244  
7.75 150 180 -6.82073  
7.50 150 180 -9.42105  
7.25 150 180 -12.74621  
7.00 150 180 -16.59703  
6.75 150 180 -19.97982  
6.50 150 180 -19.68929  
6.25 150 180 -6.61997  
6.00 150 180 43.58607  
5.75 150 180 193.43309  
5.50 150 180 596.76760  
5.25 150 180 1611.87193  
5.00 150 180 4000.39471  
4.75 150 180 7900.61029  
4.50 150 180 9253.37450  
4.25 150 180 9651.45982  
4.00 150 180 9825.25986  
3.75 150 180 9909.24976  
3.50 150 180 9952.01248  
3.25 150 180 9974.38445  
3.00 150 180 9986.25794  
2.75 150 180 9992.60801  
2.50 150 180 9996.01806  
2.25 150 180 9997.85334  
100.00 160 0 -0.00000  
50.00 160 0 -0.00000  
40.00 160 0 -0.00001  
30.00 160 0 -0.00006  
25.00 160 0 -0.00019  
20.00 160 0 -0.00080  
18.00 160 0 -0.00163  
16.00 160 0 -0.00374  
14.00 160 0 -0.01036  
13.00 160 0 -0.01937  
12.00 160 0 -0.04112  
11.00 160 0 -0.10290  
10.50 160 0 -0.17313

10.00 160 0 -0.30114  
9.75 160 0 -0.40096  
9.50 160 0 -0.53638  
9.25 160 0 -0.72011  
9.00 160 0 -0.96931  
8.75 160 0 -1.30728  
8.50 160 0 -1.76604  
8.25 160 0 -2.39025  
8.00 160 0 -3.24338  
7.75 160 0 -4.41703  
7.50 160 0 -6.04342  
7.25 160 0 -8.30692  
7.00 160 0 -11.43608  
6.75 160 0 -15.61641  
6.50 160 0 -20.65429  
6.25 160 0 -24.94782  
6.00 160 0 -22.66597  
5.75 160 0 3.45008  
5.50 160 0 99.48087  
5.25 160 0 380.41160  
5.00 160 0 1118.53187  
4.75 160 0 2931.14102  
4.50 160 0 6911.09834  
4.25 160 0 9182.15976  
4.00 160 0 9719.58977  
3.75 160 0 9891.57014  
3.50 160 0 9956.13496  
3.25 160 0 9981.93370  
3.00 160 0 9992.50458  
2.75 160 0 9996.88086  
2.50 160 0 9998.70037  
2.25 160 0 9999.45821  
100.00 160 10 -0.00000  
50.00 160 10 -0.00000  
40.00 160 10 -0.00001  
30.00 160 10 -0.00006  
25.00 160 10 -0.00019  
20.00 160 10 -0.00079  
18.00 160 10 -0.00161  
16.00 160 10 -0.00370  
14.00 160 10 -0.01024  
13.00 160 10 -0.01914  
12.00 160 10 -0.04069  
11.00 160 10 -0.10201  
10.50 160 10 -0.17172  
10.00 160 10 -0.29859  
9.75 160 10 -0.39733  
9.50 160 10 -0.53103  
9.25 160 10 -0.71193  
9.00 160 10 -0.95644  
8.75 160 10 -1.28655  
8.50 160 10 -1.73210  
8.25 160 10 -2.33405  
8.00 160 10 -3.14977  
7.75 160 10 -4.26122  
7.50 160 10 -5.78668  
7.25 160 10 -7.89423  
7.00 160 10 -10.80668  
6.75 160 10 -14.76091  
6.50 160 10 -19.81532  
6.25 160 10 -25.22596  
6.00 160 10 -27.70873  
5.75 160 10 -17.01848  
5.50 160 10 34.55387  
5.25 160 10 195.65355  
5.00 160 10 625.13355  
4.75 160 10 1668.34865  
4.50 160 10 4029.72378  
4.25 160 10 7883.21831  
4.00 160 10 9307.41173  
3.75 160 10 9720.89646  
3.50 160 10 9877.31634  
3.25 160 10 9944.02312  
3.00 160 10 9974.02857  
2.75 160 10 9987.85706  
2.50 160 10 9994.30221  
2.25 160 10 9997.32196  
100.00 160 20 -0.00000  
50.00 160 20 -0.00000  
40.00 160 20 -0.00001  
30.00 160 20 -0.00006  
25.00 160 20 -0.00018  
20.00 160 20 -0.00076  
18.00 160 20 -0.00155  
16.00 160 20 -0.00357  
14.00 160 20 -0.00989  
13.00 160 20 -0.01851  
12.00 160 20 -0.03947  
11.00 160 20 -0.09943  
10.50 160 20 -0.16766  
10.00 160 20 -0.29152  
9.75 160 20 -0.38756  
9.50 160 20 -0.51707  
9.25 160 20 -0.69135  
9.00 160 20 -0.92524  
8.75 160 20 -1.23813  
8.50 160 20 -1.65548  
8.25 160 20 -2.21103  
8.00 160 20 -2.95032  
7.75 160 20 -3.93643  
7.50 160 20 -5.25927  
7.25 160 20 -7.04969  
7.00 160 20 -9.49798

6.75 160 20 -12.86940  
6.50 160 20 -17.48944  
6.25 160 20 -23.61981  
6.00 160 20 -31.02743  
5.75 160 20 -37.79213  
5.50 160 20 -37.38705  
5.25 160 20 -12.11382  
5.00 160 20 80.67851  
4.75 160 20 335.91752  
4.50 160 20 952.84919  
4.25 160 20 2333.35936  
4.00 160 20 5274.57062  
3.75 160 20 8526.69226  
3.50 160 20 9469.38742  
3.25 160 20 9772.94665  
3.00 160 20 9895.68123  
2.75 160 20 9950.66399  
2.50 160 20 9976.35039  
2.25 160 20 9988.59039  
100.00 160 30 -0.00000  
50.00 160 30 -0.00000  
40.00 160 30 -0.00001  
30.00 160 30 -0.00005  
25.00 160 30 -0.00017  
20.00 160 30 -0.00071  
18.00 160 30 -0.00146  
16.00 160 30 -0.00338  
14.00 160 30 -0.00935  
13.00 160 30 -0.01753  
12.00 160 30 -0.03754  
11.00 160 30 -0.09511  
10.50 160 30 -0.16074  
10.00 160 30 -0.27975  
9.75 160 30 -0.37182  
9.50 160 30 -0.49562  
9.25 160 30 -0.66159  
9.00 160 30 -0.88321  
8.75 160 30 -1.17780  
8.50 160 30 -1.56752  
8.25 160 30 -2.08096  
8.00 160 30 -2.75555  
7.75 160 30 -3.64167  
7.50 160 30 -4.80987  
7.25 160 30 -6.36285  
7.00 160 30 -8.45422  
6.75 160 30 -11.31375  
6.50 160 30 -15.26980  
6.25 160 30 -20.73393  
6.00 160 30 -28.04628  
5.75 160 30 -36.92488  
5.50 160 30 -44.91748  
5.25 160 30 -43.51550  
5.00 160 30 -9.01715  
4.75 160 30 118.19718  
4.50 160 30 480.01782  
4.25 160 30 1403.83896  
4.00 160 30 3627.33973  
3.75 160 30 7757.28563  
3.50 160 30 9328.72034  
3.25 160 30 9725.93218  
3.00 160 30 9870.06742  
2.75 160 30 9936.28857  
2.50 160 30 9968.27239  
2.25 160 30 9984.07885  
100.00 160 40 -0.00000  
50.00 160 40 -0.00000  
40.00 160 40 -0.00001  
30.00 160 40 -0.00005  
25.00 160 40 -0.00015  
20.00 160 40 -0.00066  
18.00 160 40 -0.00135  
16.00 160 40 -0.00313  
14.00 160 40 -0.00868  
13.00 160 40 -0.01628  
12.00 160 40 -0.03490  
11.00 160 40 -0.08860  
10.50 160 40 -0.14988  
10.00 160 40 -0.26103  
9.75 160 40 -0.34698  
9.50 160 40 -0.46247  
9.25 160 40 -0.61719  
9.00 160 40 -0.82354  
8.75 160 40 -1.09745  
8.50 160 40 -1.45921  
8.25 160 40 -1.93489  
8.00 160 40 -2.55849  
7.75 160 40 -3.37568  
7.50 160 40 -4.45030  
7.25 160 40 -5.87493  
7.00 160 40 -7.78654  
6.75 160 40 -10.38365  
6.50 160 40 -13.92744  
6.25 160 40 -18.66902  
6.00 160 40 -24.54460  
5.75 160 40 -30.24648  
5.50 160 40 -30.77133  
5.25 160 40 -11.50729  
5.00 160 40 65.13793  
4.75 160 40 288.67280  
4.50 160 40 861.91346  
4.25 160 40 2232.16055  
4.00 160 40 5372.96577  
3.75 160 40 8702.24951

3.50 160 40 9547.51448  
3.25 160 40 9810.56255  
3.00 160 40 9915.79166  
2.75 160 40 9961.58034  
2.50 160 40 9982.26445  
2.25 160 40 9991.76864  
100.00 160 50 -0.00000  
50.00 160 50 -0.00000  
40.00 160 50 -0.00001  
30.00 160 50 -0.00004  
25.00 160 50 -0.00013  
20.00 160 50 -0.00059  
18.00 160 50 -0.00123  
16.00 160 50 -0.00285  
14.00 160 50 -0.00792  
13.00 160 50 -0.01482  
12.00 160 50 -0.03160  
11.00 160 50 -0.07970  
10.50 160 50 -0.13444  
10.00 160 50 -0.23364  
9.75 160 50 -0.31036  
9.50 160 50 -0.41350  
9.25 160 50 -0.55174  
9.00 160 50 -0.73631  
8.75 160 50 -0.98158  
8.50 160 50 -1.30597  
8.25 160 50 -1.73315  
8.00 160 50 -2.29405  
7.75 160 50 -3.03017  
7.50 160 50 -3.99928  
7.25 160 50 -5.28459  
7.00 160 50 -7.00798  
6.75 160 50 -9.34348  
6.50 160 50 -12.51376  
6.25 160 50 -16.71439  
6.00 160 50 -21.81738  
5.75 160 50 -26.49233  
5.50 160 50 -25.93485  
5.25 160 50 -6.51359  
5.00 160 50 65.96806  
4.75 160 50 270.60469  
4.50 160 50 780.15991  
4.25 160 50 1958.80610  
4.00 160 50 4562.12083  
3.75 160 50 8232.19752  
3.50 160 50 9394.44332  
3.25 160 50 9741.37057  
3.00 160 50 9881.20599  
2.75 160 50 9943.63653  
2.50 160 50 9972.84934  
2.25 160 50 9986.82637  
100.00 160 60 -0.00000  
50.00 160 60 -0.00000  
40.00 160 60 -0.00001  
30.00 160 60 -0.00004  
25.00 160 60 -0.00012  
20.00 160 60 -0.00052  
18.00 160 60 -0.00110  
16.00 160 60 -0.00256  
14.00 160 60 -0.00712  
13.00 160 60 -0.01325  
12.00 160 60 -0.02790  
11.00 160 60 -0.06912  
10.50 160 60 -0.11561  
10.00 160 60 -0.19956  
9.75 160 60 -0.26442  
9.50 160 60 -0.35165  
9.25 160 60 -0.46867  
9.00 160 60 -0.62510  
8.75 160 60 -0.83333  
8.50 160 60 -1.10922  
8.25 160 60 -1.47310  
8.00 160 60 -1.95125  
7.75 160 60 -2.57831  
7.50 160 60 -3.40136  
7.25 160 60 -4.48654  
7.00 160 60 -5.92932  
6.75 160 60 -7.86749  
6.50 160 60 -10.49028  
6.25 160 60 -14.01895  
6.00 160 60 -18.59051  
5.75 160 60 -23.87573  
5.50 160 60 -28.05645  
5.25 160 60 -25.39485  
5.00 160 60 -0.94990  
4.75 160 60 80.09152  
4.50 160 60 292.71928  
4.25 160 60 789.25036  
4.00 160 60 1865.71046  
3.75 160 60 4073.73769  
3.50 160 60 7589.37301  
3.25 160 60 9113.21486  
3.00 160 60 9574.31694  
2.75 160 60 9755.13513  
2.50 160 60 9851.29542  
2.25 160 60 9908.23039  
100.00 160 70 -0.00000  
50.00 160 70 -0.00000  
40.00 160 70 -0.00000  
30.00 160 70 -0.00003  
25.00 160 70 -0.00010  
20.00 160 70 -0.00046  
18.00 160 70 -0.00097

16.00 160 70 -0.00229  
 14.00 160 70 -0.00636  
 13.00 160 70 -0.01174  
 12.00 160 70 -0.02425  
 11.00 160 70 -0.05837  
 10.50 160 70 -0.09621  
 10.00 160 70 -0.16405  
 9.75 160 70 -0.21632  
 9.50 160 70 -0.28658  
 9.25 160 70 -0.38089  
 9.00 160 70 -0.50716  
 8.75 160 70 -0.67562  
 8.50 160 70 -0.89942  
 8.25 160 70 -1.19540  
 8.00 160 70 -1.58517  
 7.75 160 70 -2.09667  
 7.50 160 70 -2.76677  
 7.25 160 70 -3.64544  
 7.00 160 70 -4.80256  
 6.75 160 70 -6.33840  
 6.50 160 70 -8.39745  
 6.25 160 70 -11.18151  
 6.00 160 70 -14.94593  
 5.75 160 70 -19.93487  
 5.50 160 70 -26.15146  
 5.25 160 70 -32.73914  
 5.00 160 70 -36.53115  
 4.75 160 70 -28.93777  
 4.50 160 70 10.34854  
 4.25 160 70 125.66235  
 4.00 160 70 409.15000  
 3.75 160 70 1046.22067  
 3.50 160 70 2397.68403  
 3.25 160 70 5123.61665  
 3.00 160 70 8273.18846  
 2.75 160 70 9291.60074  
 2.50 160 70 9616.90780  
 2.25 160 70 9746.00340  
 100.00 160 80 -0.00000  
 50.00 160 80 -0.00000  
 40.00 160 80 -0.00000  
 30.00 160 80 -0.00003  
 25.00 160 80 -0.00009  
 20.00 160 80 -0.00041  
 18.00 160 80 -0.00087  
 16.00 160 80 -0.00206  
 14.00 160 80 -0.00572  
 13.00 160 80 -0.01045  
 12.00 160 80 -0.02110  
 11.00 160 80 -0.04899  
 10.50 160 80 -0.07916  
 10.00 160 80 -0.13258  
 9.75 160 80 -0.17353  
 9.50 160 80 -0.22849  
 9.25 160 80 -0.30226  
 9.00 160 80 -0.40119  
 8.75 160 80 -0.53359  
 8.50 160 80 -0.71027  
 8.25 160 80 -0.94526  
 8.00 160 80 -1.25668  
 7.75 160 80 -1.66808  
 7.50 160 80 -2.21029  
 7.25 160 80 -2.92454  
 7.00 160 80 -3.86718  
 6.75 160 80 -5.11756  
 6.50 160 80 -6.78983  
 6.25 160 80 -9.04972  
 6.00 160 80 -12.13379  
 5.75 160 80 -16.36051  
 5.50 160 80 -22.09939  
 5.25 160 80 -29.61105  
 5.00 160 80 -38.54706  
 4.75 160 80 -46.61844  
 4.50 160 80 -46.30294  
 4.25 160 80 -16.99730  
 4.00 160 80 93.28973  
 3.75 160 80 409.60645  
 3.50 160 80 1220.21107  
 3.25 160 80 3149.91659  
 3.00 160 80 7057.05527  
 2.75 160 80 9080.19305  
 2.50 160 80 9572.13836  
 2.25 160 80 9748.93402  
 100.00 160 90 -0.00000  
 50.00 160 90 -0.00000  
 40.00 160 90 -0.00000  
 30.00 160 90 -0.00002  
 25.00 160 90 -0.00008  
 20.00 160 90 -0.00038  
 18.00 160 90 -0.00081  
 16.00 160 90 -0.00192  
 14.00 160 90 -0.00529  
 13.00 160 90 -0.00955  
 12.00 160 90 -0.01883  
 11.00 160 90 -0.04199  
 10.50 160 90 -0.06627  
 10.00 160 90 -0.10851  
 9.75 160 90 -0.14061  
 9.50 160 90 -0.18354  
 9.25 160 90 -0.24108  
 9.00 160 90 -0.31831  
 8.75 160 90 -0.42199  
 8.50 160 90 -0.56110

8.25 160 90 -0.74752  
8.00 160 90 -0.99700  
7.75 160 90 -1.33043  
7.50 160 90 -1.77577  
7.25 160 90 -2.37087  
7.00 160 90 -3.16784  
6.75 160 90 -4.23966  
6.50 160 90 -5.69005  
6.25 160 90 -7.66682  
6.00 160 90 -10.37623  
5.75 160 90 -14.08765  
5.50 160 90 -19.09437  
5.25 160 90 -25.53795  
5.00 160 90 -32.85954  
4.75 160 90 -38.29514  
4.50 160 90 -32.99683  
4.25 160 90 7.65226  
4.00 160 90 147.81032  
3.75 160 90 548.64470  
3.50 160 90 1603.24238  
3.25 160 90 4232.03332  
3.00 160 90 8311.74261  
2.75 160 90 9466.89322  
2.50 160 90 9768.67748  
2.25 160 90 9887.36214  
100.00 160 100 -0.00000  
50.00 160 100 -0.00000  
40.00 160 100 -0.00000  
30.00 160 100 -0.00002  
25.00 160 100 -0.00008  
20.00 160 100 -0.00038  
18.00 160 100 -0.00081  
16.00 160 100 -0.00190  
14.00 160 100 -0.00517  
13.00 160 100 -0.00921  
12.00 160 100 -0.01771  
11.00 160 100 -0.03794  
10.50 160 100 -0.05836  
10.00 160 100 -0.09310  
9.75 160 100 -0.11916  
9.50 160 100 -0.15379  
9.25 160 100 -0.20004  
9.00 160 100 -0.26202  
8.75 160 100 -0.34534  
8.50 160 100 -0.45759  
8.25 160 100 -0.60908  
8.00 160 100 -0.81380  
7.75 160 100 -1.09086  
7.50 160 100 -1.46650  
7.25 160 100 -1.97710  
7.00 160 100 -2.67355  
6.75 160 100 -3.62775  
6.50 160 100 -4.94148  
6.25 160 100 -6.75740  
6.00 160 100 -9.26797  
5.75 160 100 -12.70846  
5.50 160 100 -17.29385  
5.25 160 100 -22.99436  
5.00 160 100 -28.88845  
4.75 160 100 -31.45986  
4.50 160 100 -20.31814  
4.25 160 100 32.32302  
4.00 160 100 197.32350  
3.75 160 100 651.11245  
3.50 160 100 1826.02349  
3.25 160 100 4757.12770  
3.00 160 100 8606.34812  
2.75 160 100 9557.59941  
2.50 160 100 9824.11415  
2.25 160 100 9925.43824  
100.00 160 110 -0.00000  
50.00 160 110 -0.00000  
40.00 160 110 -0.00000  
30.00 160 110 -0.00003  
25.00 160 110 -0.00009  
20.00 160 110 -0.00043  
18.00 160 110 -0.00089  
16.00 160 110 -0.00205  
14.00 160 110 -0.00548  
13.00 160 110 -0.00962  
12.00 160 110 -0.01809  
11.00 160 110 -0.03731  
10.50 160 110 -0.05601  
10.00 160 110 -0.08700  
9.75 160 110 -0.10989  
9.50 160 110 -0.14004  
9.25 160 110 -0.18005  
9.00 160 110 -0.23346  
8.75 160 110 -0.30517  
8.50 160 110 -0.40195  
8.25 160 110 -0.53316  
8.00 160 110 -0.71180  
7.75 160 110 -0.95601  
7.50 160 110 -1.29123  
7.25 160 110 -1.75329  
7.00 160 110 -2.39299  
6.75 160 110 -3.28249  
6.50 160 110 -4.52406  
6.25 160 110 -6.26045  
6.00 160 110 -8.68347  
5.75 160 110 -12.02854  
5.50 160 110 -16.52177  
5.25 160 110 -22.19363

5.00 160 110 -28.35131  
4.75 160 110 -32.22021  
4.50 160 110 -25.61438  
4.25 160 110 13.02600  
4.00 160 110 137.51233  
3.75 160 110 478.59816  
3.50 160 110 1348.97815  
3.25 160 110 3481.46179  
3.00 160 110 7658.99940  
2.75 160 110 9325.06978  
2.50 160 110 9735.04423  
2.25 160 110 9884.90421  
100.00 160 120 -0.00000  
50.00 160 120 -0.00000  
40.00 160 120 -0.00001  
30.00 160 120 -0.00004  
25.00 160 120 -0.00012  
20.00 160 120 -0.00052  
18.00 160 120 -0.00107  
16.00 160 120 -0.00243  
14.00 160 120 -0.00637  
13.00 160 120 -0.01105  
12.00 160 120 -0.02041  
11.00 160 120 -0.04094  
10.50 160 120 -0.06035  
10.00 160 120 -0.09186  
9.75 160 120 -0.11483  
9.50 160 120 -0.14490  
9.25 160 120 -0.18459  
9.00 160 120 -0.23745  
8.75 160 120 -0.30841  
8.50 160 120 -0.40439  
8.25 160 120 -0.53515  
8.00 160 120 -0.71439  
7.75 160 120 -0.96149  
7.50 160 120 -1.30383  
7.25 160 120 -1.78015  
7.00 160 120 -2.44526  
6.75 160 120 -3.37650  
6.50 160 120 -4.68233  
6.25 160 120 -6.51284  
6.00 160 120 -9.06984  
5.75 160 120 -12.60920  
5.50 160 120 -17.41458  
5.25 160 120 -23.69084  
5.00 160 120 -31.25478  
4.75 160 120 -38.74559  
4.50 160 120 -41.73579  
4.25 160 120 -28.36696  
4.00 160 120 30.57490  
3.75 160 120 204.12660  
3.50 160 120 651.73714  
3.25 160 120 1734.19787  
3.00 160 120 4238.29495  
2.75 160 120 8121.06340  
2.50 160 120 9375.56749  
2.25 160 120 9724.04523  
100.00 160 130 -0.00000  
50.00 160 130 -0.00000  
40.00 160 130 -0.00001  
30.00 160 130 -0.00005  
25.00 160 130 -0.00015  
20.00 160 130 -0.00066  
18.00 160 130 -0.00135  
16.00 160 130 -0.00307  
14.00 160 130 -0.00796  
13.00 160 130 -0.01374  
12.00 160 130 -0.02520  
11.00 160 130 -0.05004  
10.50 160 130 -0.07335  
10.00 160 130 -0.11109  
9.75 160 130 -0.13864  
9.50 160 130 -0.17480  
9.25 160 130 -0.22278  
9.00 160 130 -0.28709  
8.75 160 130 -0.37415  
8.50 160 130 -0.49305  
8.25 160 130 -0.65669  
8.00 160 130 -0.88331  
7.75 160 130 -1.19867  
7.50 160 130 -1.63885  
7.25 160 130 -2.25416  
7.00 160 130 -3.11411  
6.75 160 130 -4.31379  
6.50 160 130 -5.98139  
6.25 160 130 -8.28636  
6.00 160 130 -11.44520  
5.75 160 130 -15.71780  
5.50 160 130 -21.37634  
5.25 160 130 -28.60571  
5.00 160 130 -37.24765  
4.75 160 130 -46.20738  
4.50 160 130 -52.16383  
4.25 160 130 -46.87806  
4.00 160 130 -11.68528  
3.75 160 130 93.81391  
3.50 160 130 355.50934  
3.25 160 130 956.07672  
3.00 160 130 2286.99216  
2.75 160 130 5189.42423  
2.50 160 130 8543.76526  
2.25 160 130 9497.79253  
100.00 160 140 -0.00000

50.00 160 140 -0.00000  
40.00 160 140 -0.00001  
30.00 160 140 -0.00006  
25.00 160 140 -0.00019  
20.00 160 140 -0.00085  
18.00 160 140 -0.00173  
16.00 160 140 -0.00394  
14.00 160 140 -0.01027  
13.00 160 140 -0.01778  
12.00 160 140 -0.03277  
11.00 160 140 -0.06575  
10.50 160 140 -0.09725  
10.00 160 140 -0.14935  
9.75 160 140 -0.18814  
9.50 160 140 -0.23984  
9.25 160 140 -0.30959  
9.00 160 140 -0.40472  
8.75 160 140 -0.53571  
8.50 160 140 -0.71750  
8.25 160 140 -0.97123  
8.00 160 140 -1.32658  
7.75 160 140 -1.82473  
7.50 160 140 -2.52206  
7.25 160 140 -3.49432  
7.00 160 140 -4.84104  
6.75 160 140 -6.68872  
6.50 160 140 -9.19005  
6.25 160 140 -12.51197  
6.00 160 140 -16.79644  
5.75 160 140 -22.05857  
5.50 160 140 -27.94801  
5.25 160 140 -33.23097  
5.00 160 140 -34.74012  
4.75 160 140 -25.39842  
4.50 160 140 9.20172  
4.25 160 140 96.19961  
4.00 160 140 283.30126  
3.75 160 140 649.91723  
3.50 160 140 1325.47839  
3.25 160 140 2528.65500  
3.00 160 140 4663.84006  
2.75 160 140 7676.91860  
2.50 160 140 9106.67272  
2.25 160 140 9618.66862  
100.00 160 150 -0.00000  
50.00 160 150 -0.00000  
40.00 160 150 -0.00001  
30.00 160 150 -0.00007  
25.00 160 150 -0.00024  
20.00 160 150 -0.00105  
18.00 160 150 -0.00217  
16.00 160 150 -0.00496  
14.00 160 150 -0.01308  
13.00 160 150 -0.02286  
12.00 160 150 -0.04274  
11.00 160 150 -0.08789  
10.50 160 150 -0.13261  
10.00 160 150 -0.20928  
9.75 160 150 -0.26800  
9.50 160 150 -0.34794  
9.25 160 150 -0.45800  
9.00 160 150 -0.61102  
8.75 160 150 -0.82535  
8.50 160 150 -1.12702  
8.25 160 150 -1.55246  
8.00 160 150 -2.15188  
7.75 160 150 -2.99304  
7.50 160 150 -4.16470  
7.25 160 150 -5.77839  
7.00 160 150 -7.96421  
6.75 160 150 -10.85159  
6.50 160 150 -14.51236  
6.25 160 150 -18.81383  
6.00 160 150 -23.06321  
5.75 160 150 -25.18834  
5.50 160 150 -19.94489  
5.25 160 150 4.77046  
5.00 160 150 74.90714  
4.75 160 150 242.06971  
4.50 160 150 600.21180  
4.25 160 150 1302.36661  
4.00 160 150 2564.27416  
3.75 160 150 4640.26695  
3.50 160 150 7290.73675  
3.25 160 150 8697.36917  
3.00 160 150 9288.83369  
2.75 160 150 9591.45165  
2.50 160 150 9764.15474  
2.25 160 150 9860.21255  
100.00 160 160 -0.00000  
50.00 160 160 -0.00000  
40.00 160 160 -0.00001  
30.00 160 160 -0.00008  
25.00 160 160 -0.00028  
20.00 160 160 -0.00124  
18.00 160 160 -0.00257  
16.00 160 160 -0.00594  
14.00 160 160 -0.01592  
13.00 160 160 -0.02812  
12.00 160 160 -0.05345  
11.00 160 160 -0.11319  
10.50 160 160 -0.17477  
10.00 160 160 -0.28411

9.75 160 160 -0.37011  
9.50 160 160 -0.48926  
9.25 160 160 -0.65601  
9.00 160 160 -0.89114  
8.75 160 160 -1.22424  
8.50 160 160 -1.69687  
8.25 160 160 -2.36627  
8.00 160 160 -3.30935  
7.75 160 160 -4.62554  
7.50 160 160 -6.43579  
7.25 160 160 -8.86981  
7.00 160 160 -12.02283  
6.75 160 160 -15.83388  
6.50 160 160 -19.76736  
6.25 160 160 -22.01121  
6.00 160 160 -17.52535  
5.75 160 160 6.52770  
5.50 160 160 80.95768  
5.25 160 160 275.68241  
5.00 160 160 739.24421  
4.75 160 160 1760.19255  
4.50 160 160 3827.61573  
4.25 160 160 7177.07025  
4.00 160 160 8867.72136  
3.75 160 160 9398.17218  
3.50 160 160 9642.55909  
3.25 160 160 9780.23603  
3.00 160 160 9862.00098  
2.75 160 160 9912.20111  
2.50 160 160 9943.67626  
2.25 160 160 9963.67702  
100.00 160 170 -0.00000  
50.00 160 170 -0.00000  
40.00 160 170 -0.00001  
30.00 160 170 -0.00009  
25.00 160 170 -0.00031  
20.00 160 170 -0.00138  
18.00 160 170 -0.00287  
16.00 160 170 -0.00667  
14.00 160 170 -0.01806  
13.00 160 170 -0.03219  
12.00 160 170 -0.06199  
11.00 160 170 -0.13438  
10.50 160 170 -0.21121  
10.00 160 170 -0.35103  
9.75 160 170 -0.46291  
9.50 160 170 -0.61962  
9.25 160 170 -0.84105  
9.00 160 170 -1.15571  
8.75 160 170 -1.60400  
8.50 160 170 -2.24207  
8.25 160 170 -3.14609  
8.00 160 170 -4.41557  
7.75 160 170 -6.17280  
7.50 160 170 -8.55014  
7.25 160 170 -11.64442  
7.00 160 170 -15.38344  
6.75 160 170 -19.16185  
6.50 160 170 -20.88049  
6.25 160 170 -14.47376  
6.00 160 170 16.27869  
5.75 160 170 112.69161  
5.50 160 170 375.44835  
5.25 160 170 1037.17164  
5.00 160 170 2594.70549  
4.75 160 170 5943.51233  
4.50 160 170 8712.17025  
4.25 160 170 9435.19463  
4.00 160 170 9713.50941  
3.75 160 170 9847.25723  
3.50 160 170 9916.40683  
3.25 160 170 9953.60050  
3.00 160 170 9974.04449  
2.75 160 170 9985.41780  
2.50 160 170 9991.78764  
2.25 160 170 9995.36869  
100.00 160 180 -0.00000  
50.00 160 180 -0.00000  
40.00 160 180 -0.00002  
30.00 160 180 -0.00010  
25.00 160 180 -0.00032  
20.00 160 180 -0.00143  
18.00 160 180 -0.00298  
16.00 160 180 -0.00694  
14.00 160 180 -0.01887  
13.00 160 180 -0.03373  
12.00 160 180 -0.06528  
11.00 160 180 -0.14278  
10.50 160 180 -0.22589  
10.00 160 180 -0.37850  
9.75 160 180 -0.50131  
9.50 160 180 -0.67397  
9.25 160 180 -0.91867  
9.00 160 180 -1.26723  
8.75 160 180 -1.76460  
8.50 160 180 -2.47301  
8.25 160 180 -3.47627  
8.00 160 180 -4.88244  
7.75 160 180 -6.82073  
7.50 160 180 -9.42105  
7.25 160 180 -12.74621  
7.00 160 180 -16.59703  
6.75 160 180 -19.97982

6.50 160 180 -19.68929  
6.25 160 180 -6.61997  
6.00 160 180 43.58607  
5.75 160 180 193.43309  
5.50 160 180 596.76760  
5.25 160 180 1611.87193  
5.00 160 180 4000.39471  
4.75 160 180 7900.61029  
4.50 160 180 9253.37450  
4.25 160 180 9651.45982  
4.00 160 180 9825.25986  
3.75 160 180 9909.24976  
3.50 160 180 9952.01248  
3.25 160 180 9974.38445  
3.00 160 180 9986.25794  
2.75 160 180 9992.60801  
2.50 160 180 9996.01806  
2.25 160 180 9997.85334  
100.00 170 0 -0.00000  
50.00 170 0 -0.00000  
40.00 170 0 -0.00001  
30.00 170 0 -0.00006  
25.00 170 0 -0.00019  
20.00 170 0 -0.00080  
18.00 170 0 -0.00163  
16.00 170 0 -0.00374  
14.00 170 0 -0.01036  
13.00 170 0 -0.01937  
12.00 170 0 -0.04112  
11.00 170 0 -0.10290  
10.50 170 0 -0.17313  
10.00 170 0 -0.30114  
9.75 170 0 -0.40096  
9.50 170 0 -0.53638  
9.25 170 0 -0.72011  
9.00 170 0 -0.96931  
8.75 170 0 -1.30728  
8.50 170 0 -1.76604  
8.25 170 0 -2.39025  
8.00 170 0 -3.24338  
7.75 170 0 -4.41703  
7.50 170 0 -6.04342  
7.25 170 0 -8.30692  
7.00 170 0 -11.43608  
6.75 170 0 -15.61641  
6.50 170 0 -20.65429  
6.25 170 0 -24.94782  
6.00 170 0 -22.66597  
5.75 170 0 3.45008  
5.50 170 0 99.48087  
5.25 170 0 380.41160  
5.00 170 0 1118.53187  
4.75 170 0 2931.14102  
4.50 170 0 6911.09834  
4.25 170 0 9182.15976  
4.00 170 0 9719.58977  
3.75 170 0 9891.57014  
3.50 170 0 9956.13496  
3.25 170 0 9981.93370  
3.00 170 0 9992.50458  
2.75 170 0 9996.88086  
2.50 170 0 9998.70037  
2.25 170 0 9999.45821  
100.00 170 10 -0.00000  
50.00 170 10 -0.00000  
40.00 170 10 -0.00001  
30.00 170 10 -0.00006  
25.00 170 10 -0.00019  
20.00 170 10 -0.00079  
18.00 170 10 -0.00161  
16.00 170 10 -0.00370  
14.00 170 10 -0.01025  
13.00 170 10 -0.01918  
12.00 170 10 -0.04079  
11.00 170 10 -0.10232  
10.50 170 10 -0.17230  
10.00 170 10 -0.29965  
9.75 170 10 -0.39877  
9.50 170 10 -0.53296  
9.25 170 10 -0.71452  
9.00 170 10 -0.95987  
8.75 170 10 -1.29109  
8.50 170 10 -1.73805  
8.25 170 10 -2.34180  
8.00 170 10 -3.15984  
7.75 170 10 -4.27431  
7.50 170 10 -5.80380  
7.25 170 10 -7.91704  
7.00 170 10 -10.83804  
6.75 170 10 -14.80618  
6.50 170 10 -19.88492  
6.25 170 10 -25.34072  
6.00 170 10 -27.91092  
5.75 170 10 -17.39445  
5.50 170 10 33.82883  
5.25 170 10 194.23241  
5.00 170 10 622.36856  
4.75 170 10 1663.18030  
4.50 170 10 4020.97076  
4.25 170 10 7878.85657  
4.00 170 10 9307.32301  
3.75 170 10 9721.27117  
3.50 170 10 9877.63714

3.25 170 10 9944.23872  
3.00 170 10 9974.16081  
2.75 170 10 9987.93409  
2.50 170 10 9994.34553  
2.25 170 10 9997.34570  
100.00 170 20 -0.00000  
50.00 170 20 -0.00000  
40.00 170 20 -0.00001  
30.00 170 20 -0.00006  
25.00 170 20 -0.00018  
20.00 170 20 -0.00076  
18.00 170 20 -0.00156  
16.00 170 20 -0.00359  
14.00 170 20 -0.00995  
13.00 170 20 -0.01864  
12.00 170 20 -0.03985  
11.00 170 20 -0.10062  
10.50 170 20 -0.16982  
10.00 170 20 -0.29549  
9.75 170 20 -0.39293  
9.50 170 20 -0.52430  
9.25 170 20 -0.70105  
9.00 170 20 -0.93818  
8.75 170 20 -1.25529  
8.50 170 20 -1.67814  
8.25 170 20 -2.24083  
8.00 170 20 -2.98948  
7.75 170 20 -3.98811  
7.50 170 20 -5.32824  
7.25 170 20 -7.14368  
7.00 170 20 -9.63006  
6.75 170 20 -13.06229  
6.50 170 20 -17.78282  
6.25 170 20 -24.08185  
6.00 170 20 -31.77100  
5.75 170 20 -38.99195  
5.50 170 20 -39.27959  
5.25 170 20 -14.91382  
5.00 170 20 77.16317  
4.75 170 20 333.68117  
4.50 170 20 960.35586  
4.25 170 20 2380.50101  
4.00 170 20 5456.13003  
3.75 170 20 8641.08112  
3.50 170 20 9517.17489  
3.25 170 20 9797.55378  
3.00 170 20 9909.14857  
2.75 170 20 9958.10425  
2.50 170 20 9980.43935  
2.25 170 20 9990.81479  
100.00 170 30 -0.00000  
50.00 170 30 -0.00000  
40.00 170 30 -0.00001  
30.00 170 30 -0.00005  
25.00 170 30 -0.00017  
20.00 170 30 -0.00072  
18.00 170 30 -0.00148  
16.00 170 30 -0.00341  
14.00 170 30 -0.00947  
13.00 170 30 -0.01781  
12.00 170 30 -0.03829  
11.00 170 30 -0.09745  
10.50 170 30 -0.16503  
10.00 170 30 -0.28765  
9.75 170 30 -0.38251  
9.50 170 30 -0.51006  
9.25 170 30 -0.68102  
9.00 170 30 -0.90926  
8.75 170 30 -1.21260  
8.50 170 30 -1.61393  
8.25 170 30 -2.14288  
8.00 170 30 -2.83852  
7.75 170 30 -3.75403  
7.50 170 30 -4.96475  
7.25 170 30 -6.58165  
7.00 170 30 -8.77206  
6.75 170 30 -11.78638  
6.50 170 30 -15.97773  
6.25 170 30 -21.76748  
6.00 170 30 -29.42311  
5.75 170 30 -38.31154  
5.50 170 30 -44.83933  
5.25 170 30 -37.32245  
5.00 170 30 16.04053  
4.75 170 30 194.47253  
4.50 170 30 686.14702  
4.25 170 30 1927.83344  
4.00 170 30 4919.19843  
3.75 170 30 8619.69409  
3.50 170 30 9547.60808  
3.25 170 30 9810.35267  
3.00 170 30 9913.54790  
2.75 170 30 9959.59299  
2.50 170 30 9980.89506  
2.25 170 30 9990.91788  
100.00 170 40 -0.00000  
50.00 170 40 -0.00000  
40.00 170 40 -0.00001  
30.00 170 40 -0.00005  
25.00 170 40 -0.00015  
20.00 170 40 -0.00067  
18.00 170 40 -0.00137  
16.00 170 40 -0.00318

14.00 170 40 -0.00887  
13.00 170 40 -0.01669  
12.00 170 40 -0.03600  
11.00 170 40 -0.09203  
10.50 170 40 -0.15616  
10.00 170 40 -0.27258  
9.75 170 40 -0.36262  
9.50 170 40 -0.48365  
9.25 170 40 -0.64579  
9.00 170 40 -0.86209  
8.75 170 40 -1.14934  
8.50 170 40 -1.52910  
8.25 170 40 -2.02941  
8.00 170 40 -2.68746  
7.75 170 40 -3.55440  
7.50 170 40 -4.70345  
7.25 170 40 -6.24304  
7.00 170 40 -8.33479  
6.75 170 40 -11.20931  
6.50 170 40 -15.14856  
6.25 170 40 -20.33940  
6.00 170 40 -26.33986  
5.75 170 40 -30.52366  
5.50 170 40 -24.04800  
5.25 170 40 17.80397  
5.00 170 40 157.48218  
4.75 170 40 543.11855  
4.50 170 40 1514.82262  
4.25 170 40 3857.55640  
4.00 170 40 8032.15135  
3.75 170 40 9452.11101  
3.50 170 40 9807.27590  
3.25 170 40 9925.99259  
3.00 170 40 9970.63596  
2.75 170 40 9988.19931  
2.50 170 40 9995.23333  
2.25 170 40 9998.07063  
100.00 170 50 -0.00000  
50.00 170 50 -0.00000  
40.00 170 50 -0.00001  
30.00 170 50 -0.00004  
25.00 170 50 -0.00014  
20.00 170 50 -0.00060  
18.00 170 50 -0.00125  
16.00 170 50 -0.00292  
14.00 170 50 -0.00815  
13.00 170 50 -0.01533  
12.00 170 50 -0.03294  
11.00 170 50 -0.08379  
10.50 170 50 -0.14187  
10.00 170 50 -0.24728  
9.75 170 50 -0.32884  
9.50 170 50 -0.43854  
9.25 170 50 -0.58561  
9.00 170 50 -0.78207  
8.75 170 50 -1.04339  
8.50 170 50 -1.38957  
8.25 170 50 -1.84677  
8.00 170 50 -2.44995  
7.75 170 50 -3.24747  
7.50 170 50 -4.30881  
7.25 170 50 -5.73688  
7.00 170 50 -7.68425  
6.75 170 50 -10.36506  
6.50 170 50 -14.02930  
6.25 170 50 -18.79897  
6.00 170 50 -24.09862  
5.75 170 50 -27.03262  
5.50 170 50 -18.25354  
5.25 170 50 27.73791  
5.00 170 50 173.97931  
4.75 170 50 566.37129  
4.50 170 50 1530.51224  
4.25 170 50 3798.11104  
4.00 170 50 7909.68993  
3.75 170 50 9416.65063  
3.50 170 50 9794.00518  
3.25 170 50 9920.28571  
3.00 170 50 9968.07383  
2.75 170 50 9987.03884  
2.50 170 50 9994.70928  
2.25 170 50 9997.83553  
100.00 170 60 -0.00000  
50.00 170 60 -0.00000  
40.00 170 60 -0.00001  
30.00 170 60 -0.00004  
25.00 170 60 -0.00012  
20.00 170 60 -0.00054  
18.00 170 60 -0.00112  
16.00 170 60 -0.00264  
14.00 170 60 -0.00738  
13.00 170 60 -0.01380  
12.00 170 60 -0.02930  
11.00 170 60 -0.07328  
10.50 170 60 -0.12309  
10.00 170 60 -0.21321  
9.75 170 60 -0.28289  
9.50 170 60 -0.37664  
9.25 170 60 -0.50244  
9.00 170 60 -0.67069  
8.75 170 60 -0.89483  
8.50 170 60 -1.19220  
8.25 170 60 -1.58537

8.00 170 60 -2.10408  
7.75 170 60 -2.78869  
7.50 170 60 -3.69589  
7.25 170 60 -4.90797  
7.00 170 60 -6.54647  
6.75 170 60 -8.78733  
6.50 170 60 -11.86312  
6.25 170 60 -16.00481  
6.00 170 60 -21.19447  
5.75 170 60 -26.41710  
5.50 170 60 -27.72368  
5.25 170 60 -13.71072  
5.00 170 60 44.18738  
4.75 170 60 211.14119  
4.50 170 60 626.01121  
4.25 170 60 1571.39945  
4.00 170 60 3609.98098  
3.75 170 60 7321.84428  
3.50 170 60 9124.89571  
3.25 170 60 9628.60398  
3.00 170 60 9825.90455  
2.75 170 60 9914.85943  
2.50 170 60 9957.50676  
2.25 170 60 9978.57784  
100.00 170 70 -0.00000  
50.00 170 70 -0.00000  
40.00 170 70 -0.00000  
30.00 170 70 -0.00003  
25.00 170 70 -0.00010  
20.00 170 70 -0.00047  
18.00 170 70 -0.00100  
16.00 170 70 -0.00236  
14.00 170 70 -0.00661  
13.00 170 70 -0.01226  
12.00 170 70 -0.02554  
11.00 170 70 -0.06211  
10.50 170 70 -0.10286  
10.00 170 70 -0.17608  
9.75 170 70 -0.23255  
9.50 170 70 -0.30849  
9.25 170 70 -0.41046  
9.00 170 70 -0.54702  
8.75 170 70 -0.72928  
8.50 170 70 -0.97159  
8.25 170 70 -1.29247  
8.00 170 70 -1.71595  
7.75 170 70 -2.27377  
7.50 170 70 -3.00880  
7.25 170 70 -3.98088  
7.00 170 70 -5.27616  
6.75 170 70 -7.02081  
6.50 170 70 -9.39772  
6.25 170 70 -12.65684  
6.00 170 70 -17.08901  
5.75 170 70 -22.88486  
5.50 170 70 -29.69981  
5.25 170 70 -35.55565  
5.00 170 70 -34.38092  
4.75 170 70 -10.96101  
4.50 170 70 68.80765  
4.25 170 70 276.17174  
4.00 170 70 753.98693  
3.75 170 70 1783.30205  
3.50 170 70 3908.80202  
3.25 170 70 7479.60567  
3.00 170 70 9116.41677  
2.75 170 70 9598.64750  
2.50 170 70 9777.18017  
2.25 170 70 9865.35954  
100.00 170 80 -0.00000  
50.00 170 80 -0.00000  
40.00 170 80 -0.00000  
30.00 170 80 -0.00003  
25.00 170 80 -0.00009  
20.00 170 80 -0.00042  
18.00 170 80 -0.00089  
16.00 170 80 -0.00213  
14.00 170 80 -0.00594  
13.00 170 80 -0.01090  
12.00 170 80 -0.02220  
11.00 170 80 -0.05206  
10.50 170 80 -0.08456  
10.00 170 80 -0.14227  
9.75 170 80 -0.18658  
9.50 170 80 -0.24608  
9.25 170 80 -0.32600  
9.00 170 80 -0.43322  
8.75 170 80 -0.57678  
8.50 170 80 -0.76846  
8.25 170 80 -1.02360  
8.00 170 80 -1.36218  
7.75 170 80 -1.81041  
7.50 170 80 -2.40318  
7.25 170 80 -3.18797  
7.00 170 80 -4.23121  
6.75 170 80 -5.62839  
6.50 170 80 -7.51938  
6.25 170 80 -10.10916  
6.00 170 80 -13.68949  
5.75 170 80 -18.64382  
5.50 170 80 -25.38392  
5.25 170 80 -34.08858  
5.00 170 80 -43.93562

4.75 170 80 -51.10621  
 4.50 170 80 -43.85590  
 4.25 170 80 9.49281  
 4.00 170 80 189.89164  
 3.75 170 80 699.17291  
 3.50 170 80 2029.82323  
 3.25 170 80 5332.46715  
 3.00 170 80 8802.57043  
 2.75 170 80 9586.20210  
 2.50 170 80 9809.01510  
 2.25 170 80 9903.38501  
 100.00 170 90 -0.00000  
 50.00 170 90 -0.00000  
 40.00 170 90 -0.00000  
 30.00 170 90 -0.00002  
 25.00 170 90 -0.00008  
 20.00 170 90 -0.00039  
 18.00 170 90 -0.00083  
 16.00 170 90 -0.00197  
 14.00 170 90 -0.00546  
 13.00 170 90 -0.00991  
 12.00 170 90 -0.01969  
 11.00 170 90 -0.04436  
 10.50 170 90 -0.07039  
 10.00 170 90 -0.11587  
 9.75 170 90 -0.15050  
 9.50 170 90 -0.19689  
 9.25 170 90 -0.25914  
 9.00 170 90 -0.34278  
 8.75 170 90 -0.45518  
 8.50 170 90 -0.60616  
 8.25 170 90 -0.80877  
 8.00 170 90 -1.08038  
 7.75 170 90 -1.44429  
 7.50 170 90 -1.93196  
 7.25 170 90 -2.58661  
 7.00 170 90 -3.46860  
 6.75 170 90 -4.66377  
 6.50 170 90 -6.29536  
 6.25 170 90 -8.53938  
 6.00 170 90 -11.63806  
 5.75 170 90 -15.89225  
 5.50 170 90 -21.57567  
 5.25 170 90 -28.61761  
 5.00 170 90 -35.66101  
 4.75 170 90 -37.50427  
 4.50 170 90 -18.42037  
 4.25 170 90 65.07275  
 4.00 170 90 328.71906  
 3.75 170 90 1076.01609  
 3.50 170 90 3096.29542  
 3.25 170 90 7610.23345  
 3.00 170 90 9412.09298  
 2.75 170 90 9803.44774  
 2.50 170 90 9927.45723  
 2.25 170 90 9972.27338  
 100.00 170 100 -0.00000  
 50.00 170 100 -0.00000  
 40.00 170 100 -0.00000  
 30.00 170 100 -0.00002  
 25.00 170 100 -0.00008  
 20.00 170 100 -0.00039  
 18.00 170 100 -0.00082  
 16.00 170 100 -0.00193  
 14.00 170 100 -0.00529  
 13.00 170 100 -0.00947  
 12.00 170 100 -0.01834  
 11.00 170 100 -0.03965  
 10.50 170 100 -0.06135  
 10.00 170 100 -0.09842  
 9.75 170 100 -0.12632  
 9.50 170 100 -0.16348  
 9.25 170 100 -0.21320  
 9.00 170 100 -0.27997  
 8.75 170 100 -0.36990  
 8.50 170 100 -0.49129  
 8.25 170 100 -0.65548  
 8.00 170 100 -0.87796  
 7.75 170 100 -1.18005  
 7.50 170 100 -1.59130  
 7.25 170 100 -2.15313  
 7.00 170 100 -2.92418  
 6.75 170 100 -3.98804  
 6.50 170 100 -5.46357  
 6.25 170 100 -7.51597  
 6.00 170 100 -10.36073  
 5.75 170 100 -14.23459  
 5.50 170 100 -19.26300  
 5.25 170 100 -25.04035  
 5.00 170 100 -29.46431  
 4.75 170 100 -25.69234  
 4.50 170 100 5.58627  
 4.25 170 100 115.65403  
 4.00 170 100 437.42824  
 3.75 170 100 1313.98512  
 3.50 170 100 3635.89208  
 3.25 170 100 8116.02455  
 3.00 170 100 9519.38564  
 2.75 170 100 9842.52312  
 2.50 170 100 9943.78130  
 2.25 170 100 9979.32527  
 100.00 170 110 -0.00000  
 50.00 170 110 -0.00000

40.00 170 110 -0.00000  
 30.00 170 110 -0.00003  
 25.00 170 110 -0.00009  
 20.00 170 110 -0.00043  
 18.00 170 110 -0.00089  
 16.00 170 110 -0.00207  
 14.00 170 110 -0.00555  
 13.00 170 110 -0.00978  
 12.00 170 110 -0.01850  
 11.00 170 110 -0.03846  
 10.50 170 110 -0.05803  
 10.00 170 110 -0.09062  
 9.75 170 110 -0.11479  
 9.50 170 110 -0.14670  
 9.25 170 110 -0.18914  
 9.00 170 110 -0.24594  
 8.75 170 110 -0.32238  
 8.50 170 110 -0.42580  
 8.25 170 110 -0.56637  
 8.00 170 110 -0.75833  
 7.75 170 110 -1.02165  
 7.50 170 110 -1.38452  
 7.25 170 110 -1.88704  
 7.00 170 110 -2.58652  
 6.75 170 110 -3.56499  
 6.50 170 110 -4.93897  
 6.25 170 110 -6.86993  
 6.00 170 110 -9.56850  
 5.75 170 110 -13.27077  
 5.50 170 110 -18.12891  
 5.25 170 110 -23.86877  
 5.00 170 110 -28.85763  
 4.75 170 110 -27.72942  
 4.50 170 110 -5.53656  
 4.25 170 110 76.48026  
 4.00 170 110 315.65747  
 3.75 170 110 953.97458  
 3.50 170 110 2593.66094  
 3.25 170 110 6589.94191  
 3.00 170 110 9184.04430  
 2.75 170 110 9737.52990  
 2.50 170 110 9903.94942  
 2.25 170 110 9963.20694  
 100.00 170 120 -0.00000  
 50.00 170 120 -0.00000  
 40.00 170 120 -0.00001  
 30.00 170 120 -0.00004  
 25.00 170 120 -0.00012  
 20.00 170 120 -0.00052  
 18.00 170 120 -0.00106  
 16.00 170 120 -0.00243  
 14.00 170 120 -0.00640  
 13.00 170 120 -0.01113  
 12.00 170 120 -0.02064  
 11.00 170 120 -0.04163  
 10.50 170 120 -0.06158  
 10.00 170 120 -0.09411  
 9.75 170 120 -0.11791  
 9.50 170 120 -0.14910  
 9.25 170 120 -0.19038  
 9.00 170 120 -0.24545  
 8.75 170 120 -0.31952  
 8.50 170 120 -0.41990  
 8.25 170 120 -0.55692  
 8.00 170 120 -0.74515  
 7.75 170 120 -1.00524  
 7.50 170 120 -1.36652  
 7.25 170 120 -1.87075  
 7.00 170 120 -2.57730  
 6.75 170 120 -3.57052  
 6.50 170 120 -4.96914  
 6.25 170 120 -6.93737  
 6.00 170 120 -9.69353  
 5.75 170 120 -13.50407  
 5.50 170 120 -18.63023  
 5.25 170 120 -25.14532  
 5.00 170 120 -32.43002  
 4.75 170 120 -37.90277  
 4.50 170 120 -33.98362  
 4.25 170 120 -1.01170  
 4.00 170 120 109.15736  
 3.75 170 120 411.28485  
 3.50 170 120 1175.61986  
 3.25 170 120 3030.96903  
 3.00 170 120 7053.71108  
 2.75 170 120 9189.86015  
 2.50 170 120 9694.91967  
 2.25 170 120 9870.78398  
 100.00 170 130 -0.00000  
 50.00 170 130 -0.00000  
 40.00 170 130 -0.00001  
 30.00 170 130 -0.00005  
 25.00 170 130 -0.00015  
 20.00 170 130 -0.00066  
 18.00 170 130 -0.00135  
 16.00 170 130 -0.00306  
 14.00 170 130 -0.00796  
 13.00 170 130 -0.01376  
 12.00 170 130 -0.02529  
 11.00 170 130 -0.05038  
 10.50 170 130 -0.07399  
 10.00 170 130 -0.11232  
 9.75 170 130 -0.14034

9.50 170 130 -0.17716  
 9.25 170 130 -0.22606  
 9.00 170 130 -0.29167  
 8.75 170 130 -0.38057  
 8.50 170 130 -0.50208  
 8.25 170 130 -0.66945  
 8.00 170 130 -0.90145  
 7.75 170 130 -1.22456  
 7.50 170 130 -1.67607  
 7.25 170 130 -2.30803  
 7.00 170 130 -3.19268  
 6.75 170 130 -4.42919  
 6.50 170 130 -6.15195  
 6.25 170 130 -8.53928  
 6.00 170 130 -11.81950  
 5.75 170 130 -16.26547  
 5.50 170 130 -22.15564  
 5.25 170 130 -29.65111  
 5.00 170 130 -38.47779  
 4.75 170 130 -47.18282  
 4.50 170 130 -51.49444  
 4.25 170 130 -40.83431  
 4.00 170 130 8.98743  
 3.75 170 130 151.15578  
 3.50 170 130 500.87390  
 3.25 170 130 1307.28106  
 3.00 170 130 3107.78039  
 2.75 170 130 6814.01132  
 2.50 170 130 9055.86340  
 2.25 170 130 9636.85221  
 100.00 170 140 -0.00000  
 50.00 170 140 -0.00000  
 40.00 170 140 -0.00001  
 30.00 170 140 -0.00006  
 25.00 170 140 -0.00019  
 20.00 170 140 -0.00084  
 18.00 170 140 -0.00173  
 16.00 170 140 -0.00393  
 14.00 170 140 -0.01025  
 13.00 170 140 -0.01777  
 12.00 170 140 -0.03278  
 11.00 170 140 -0.06587  
 10.50 170 140 -0.09751  
 10.00 170 140 -0.14991  
 9.75 170 140 -0.18893  
 9.50 170 140 -0.24097  
 9.25 170 140 -0.31119  
 9.00 170 140 -0.40699  
 8.75 170 140 -0.53895  
 8.50 170 140 -0.72210  
 8.25 170 140 -0.97779  
 8.00 170 140 -1.33596  
 7.75 170 140 -1.83819  
 7.50 170 140 -2.54145  
 7.25 170 140 -3.52240  
 7.00 170 140 -4.88193  
 6.75 170 140 -6.74860  
 6.50 170 140 -9.27825  
 6.25 170 140 -12.64243  
 6.00 170 140 -16.98977  
 5.75 170 140 -22.34423  
 5.50 170 140 -28.36568  
 5.25 170 140 -33.82767  
 5.00 170 140 -35.55495  
 4.75 170 140 -26.41614  
 4.50 170 140 8.16960  
 4.25 170 140 95.79418  
 4.00 170 140 285.24684  
 3.75 170 140 658.42942  
 3.50 170 140 1350.44364  
 3.25 170 140 2592.95002  
 3.00 170 140 4820.34833  
 2.75 170 140 7832.63163  
 2.50 170 140 9168.62457  
 2.25 170 140 9645.39372  
 100.00 170 150 -0.00000  
 50.00 170 150 -0.00000  
 40.00 170 150 -0.00001  
 30.00 170 150 -0.00007  
 25.00 170 150 -0.00024  
 20.00 170 150 -0.00105  
 18.00 170 150 -0.00216  
 16.00 170 150 -0.00495  
 14.00 170 150 -0.01306  
 13.00 170 150 -0.02284  
 12.00 170 150 -0.04271  
 11.00 170 150 -0.08790  
 10.50 170 150 -0.13268  
 10.00 170 150 -0.20946  
 9.75 170 150 -0.26829  
 9.50 170 150 -0.34837  
 9.25 170 150 -0.45864  
 9.00 170 150 -0.61196  
 8.75 170 150 -0.82672  
 8.50 170 150 -1.12900  
 8.25 170 150 -1.55533  
 8.00 170 150 -2.15604  
 7.75 170 150 -2.99906  
 7.50 170 150 -4.17344  
 7.25 170 150 -5.79108  
 7.00 170 150 -7.98271  
 6.75 170 150 -10.87866  
 6.50 170 150 -14.55214

6.25 170 150 -18.87252  
6.00 170 150 -23.15006  
5.75 170 150 -25.31707  
5.50 170 150 -20.13535  
5.25 170 150 4.49039  
5.00 170 150 74.50033  
4.75 170 150 241.49067  
4.50 170 150 599.41247  
4.25 170 150 1301.31206  
4.00 170 150 2562.98004  
3.75 170 150 4638.90095  
3.50 170 150 7290.29097  
3.25 170 150 8697.69734  
3.00 170 150 9289.45996  
2.75 170 150 9592.26111  
2.50 170 150 9764.99570  
2.25 170 150 9860.92483  
100.00 170 160 -0.00000  
50.00 170 160 -0.00000  
40.00 170 160 -0.00001  
30.00 170 160 -0.00008  
25.00 170 160 -0.00028  
20.00 170 160 -0.00124  
18.00 170 160 -0.00257  
16.00 170 160 -0.00594  
14.00 170 160 -0.01590  
13.00 170 160 -0.02810  
12.00 170 160 -0.05343  
11.00 170 160 -0.11318  
10.50 170 160 -0.17477  
10.00 170 160 -0.28415  
9.75 170 160 -0.37018  
9.50 170 160 -0.48938  
9.25 170 160 -0.65620  
9.00 170 160 -0.89143  
8.75 170 160 -1.22469  
8.50 170 160 -1.69754  
8.25 170 160 -2.36728  
8.00 170 160 -3.31083  
7.75 170 160 -4.62772  
7.50 170 160 -6.43898  
7.25 170 160 -8.87448  
7.00 170 160 -12.02967  
6.75 170 160 -15.84390  
6.50 170 160 -19.78204  
6.25 170 160 -22.03271  
6.00 170 160 -17.55677  
5.75 170 160 6.48210  
5.50 170 160 80.89240  
5.25 170 160 275.59114  
5.00 170 160 739.12101  
4.75 170 160 1760.03259  
4.50 170 160 3827.40814  
4.25 170 160 7176.88174  
4.00 170 160 8867.64091  
3.75 170 160 9398.11359  
3.50 170 160 9642.51724  
3.25 170 160 9780.20593  
3.00 170 160 9861.97926  
2.75 170 160 9912.18544  
2.50 170 160 9943.66498  
2.25 170 160 9963.66894  
100.00 170 170 -0.00000  
50.00 170 170 -0.00000  
40.00 170 170 -0.00001  
30.00 170 170 -0.00009  
25.00 170 170 -0.00031  
20.00 170 170 -0.00138  
18.00 170 170 -0.00287  
16.00 170 170 -0.00667  
14.00 170 170 -0.01806  
13.00 170 170 -0.03218  
12.00 170 170 -0.06198  
11.00 170 170 -0.13437  
10.50 170 170 -0.21120  
10.00 170 170 -0.35104  
9.75 170 170 -0.46292  
9.50 170 170 -0.61964  
9.25 170 170 -0.84109  
9.00 170 170 -1.15577  
8.75 170 170 -1.60409  
8.50 170 170 -2.24222  
8.25 170 170 -3.14631  
8.00 170 170 -4.41591  
7.75 170 170 -6.17329  
7.50 170 170 -8.55087  
7.25 170 170 -11.64549  
7.00 170 170 -15.38498  
6.75 170 170 -19.16407  
6.50 170 170 -20.88362  
6.25 170 170 -14.47801  
6.00 170 170 16.27337  
5.75 170 170 112.68622  
5.50 170 170 375.44666  
5.25 170 170 1037.18430  
5.00 170 170 2594.75783  
4.75 170 170 5943.64004  
4.50 170 170 8712.21241  
4.25 170 170 9435.20698  
4.00 170 170 9713.51510  
3.75 170 170 9847.26011  
3.50 170 170 9916.40837  
3.25 170 170 9953.60134

3.00 170 170 9974.04496  
2.75 170 170 9985.41806  
2.50 170 170 9991.78779  
2.25 170 170 9995.36877  
100.00 170 180 -0.00000  
50.00 170 180 -0.00000  
40.00 170 180 -0.00002  
30.00 170 180 -0.00010  
25.00 170 180 -0.00032  
20.00 170 180 -0.00143  
18.00 170 180 -0.00298  
16.00 170 180 -0.00694  
14.00 170 180 -0.01887  
13.00 170 180 -0.03373  
12.00 170 180 -0.06528  
11.00 170 180 -0.14278  
10.50 170 180 -0.22589  
10.00 170 180 -0.37850  
9.75 170 180 -0.50131  
9.50 170 180 -0.67397  
9.25 170 180 -0.91867  
9.00 170 180 -1.26723  
8.75 170 180 -1.76460  
8.50 170 180 -2.47301  
8.25 170 180 -3.47627  
8.00 170 180 -4.88244  
7.75 170 180 -6.82073  
7.50 170 180 -9.42105  
7.25 170 180 -12.74621  
7.00 170 180 -16.59703  
6.75 170 180 -19.97982  
6.50 170 180 -19.68929  
6.25 170 180 -6.61997  
6.00 170 180 43.58607  
5.75 170 180 193.43309  
5.50 170 180 596.76760  
5.25 170 180 1611.87193  
5.00 170 180 4000.39471  
4.75 170 180 7900.61029  
4.50 170 180 9253.37450  
4.25 170 180 9651.45982  
4.00 170 180 9825.25986  
3.75 170 180 9909.24976  
3.50 170 180 9952.01248  
3.25 170 180 9974.38445  
3.00 170 180 9986.25794  
2.75 170 180 9992.60801  
2.50 170 180 9996.01806  
2.25 170 180 9997.85334  
100.00 180 0 -0.00000  
50.00 180 0 -0.00000  
40.00 180 0 -0.00001  
30.00 180 0 -0.00006  
25.00 180 0 -0.00019  
20.00 180 0 -0.00080  
18.00 180 0 -0.00163  
16.00 180 0 -0.00374  
14.00 180 0 -0.01036  
13.00 180 0 -0.01937  
12.00 180 0 -0.04112  
11.00 180 0 -0.10290  
10.50 180 0 -0.17313  
10.00 180 0 -0.30114  
9.75 180 0 -0.40096  
9.50 180 0 -0.53638  
9.25 180 0 -0.72011  
9.00 180 0 -0.96931  
8.75 180 0 -1.30728  
8.50 180 0 -1.76604  
8.25 180 0 -2.39025  
8.00 180 0 -3.24338  
7.75 180 0 -4.41703  
7.50 180 0 -6.04342  
7.25 180 0 -8.30692  
7.00 180 0 -11.43608  
6.75 180 0 -15.61641  
6.50 180 0 -20.65429  
6.25 180 0 -24.94782  
6.00 180 0 -22.66597  
5.75 180 0 3.45008  
5.50 180 0 99.48087  
5.25 180 0 380.41160  
5.00 180 0 1118.53187  
4.75 180 0 2931.14102  
4.50 180 0 6911.09834  
4.25 180 0 9182.15976  
4.00 180 0 9719.58977  
3.75 180 0 9891.57014  
3.50 180 0 9956.13496  
3.25 180 0 9981.93370  
3.00 180 0 9992.50458  
2.75 180 0 9996.88086  
2.50 180 0 9998.70037  
2.25 180 0 9999.45821  
100.00 180 10 -0.00000  
50.00 180 10 -0.00000  
40.00 180 10 -0.00001  
30.00 180 10 -0.00006  
25.00 180 10 -0.00019  
20.00 180 10 -0.00079  
18.00 180 10 -0.00161  
16.00 180 10 -0.00371  
14.00 180 10 -0.01026

13.00 180 10 -0.01919  
12.00 180 10 -0.04083  
11.00 180 10 -0.10243  
10.50 180 10 -0.17250  
10.00 180 10 -0.30002  
9.75 180 10 -0.39927  
9.50 180 10 -0.53363  
9.25 180 10 -0.71541  
9.00 180 10 -0.96106  
8.75 180 10 -1.29266  
8.50 180 10 -1.74012  
8.25 180 10 -2.34450  
8.00 180 10 -3.16335  
7.75 180 10 -4.27887  
7.50 180 10 -5.80977  
7.25 180 10 -7.92499  
7.00 180 10 -10.84900  
6.75 180 10 -14.82202  
6.50 180 10 -19.90931  
6.25 180 10 -25.38096  
6.00 180 10 -27.98183  
5.75 180 10 -17.52625  
5.50 180 10 33.57489  
5.25 180 10 193.73527  
5.00 180 10 621.40292  
4.75 180 10 1661.37994  
4.50 180 10 4017.93779  
4.25 180 10 7877.36761  
4.00 180 10 9307.30977  
3.75 180 10 9721.41130  
3.50 180 10 9877.75414  
3.25 180 10 9944.31668  
3.00 180 10 9974.20842  
2.75 180 10 9987.96172  
2.50 180 10 9994.36103  
2.25 180 10 9997.35419  
100.00 180 20 -0.00000  
50.00 180 20 -0.00000  
40.00 180 20 -0.00001  
30.00 180 20 -0.00006  
25.00 180 20 -0.00018  
20.00 180 20 -0.00076  
18.00 180 20 -0.00156  
16.00 180 20 -0.00360  
14.00 180 20 -0.00997  
13.00 180 20 -0.01869  
12.00 180 20 -0.03998  
11.00 180 20 -0.10103  
10.50 180 20 -0.17058  
10.00 180 20 -0.29688  
9.75 180 20 -0.39481  
9.50 180 20 -0.52684  
9.25 180 20 -0.70445  
9.00 180 20 -0.94271  
8.75 180 20 -1.26131  
8.50 180 20 -1.68609  
8.25 180 20 -2.25130  
8.00 180 20 -3.00326  
7.75 180 20 -4.00633  
7.50 180 20 -5.35266  
7.25 180 20 -7.17710  
7.00 180 20 -9.67725  
6.75 180 20 -13.13156  
6.50 180 20 -17.88854  
6.25 180 20 -24.24836  
6.00 180 20 -32.03765  
5.75 180 20 -39.41697  
5.50 180 20 -39.93402  
5.25 180 20 -15.83681  
5.00 180 20 76.13765  
4.75 180 20 333.50767  
4.50 180 20 964.65465  
4.25 180 20 2401.46544  
4.00 180 20 5530.77715  
3.75 180 20 8682.76773  
3.50 180 20 9534.07752  
3.25 180 20 9806.11154  
3.00 180 20 9913.77595  
2.75 180 20 9960.62281  
2.50 180 20 9981.80042  
2.25 180 20 9991.54204  
100.00 180 30 -0.00000  
50.00 180 30 -0.00000  
40.00 180 30 -0.00001  
30.00 180 30 -0.00005  
25.00 180 30 -0.00017  
20.00 180 30 -0.00072  
18.00 180 30 -0.00148  
16.00 180 30 -0.00342  
14.00 180 30 -0.00952  
13.00 180 30 -0.01791  
12.00 180 30 -0.03855  
11.00 180 30 -0.09828  
10.50 180 30 -0.16655  
10.00 180 30 -0.29044  
9.75 180 30 -0.38629  
9.50 180 30 -0.51516  
9.25 180 30 -0.68789  
9.00 180 30 -0.91848  
8.75 180 30 -1.22494  
8.50 180 30 -1.63043  
8.25 180 30 -2.16495  
8.00 180 30 -2.86824

7.75 180 30 -3.79455  
7.50 180 30 -5.02108  
7.25 180 30 -6.66204  
7.00 180 30 -8.89003  
6.75 180 30 -11.96318  
6.50 180 30 -16.24309  
6.25 180 30 -22.15112  
6.00 180 30 -29.91508  
5.75 180 30 -38.73348  
5.50 180 30 -44.48497  
5.25 180 30 -34.03885  
5.00 180 30 28.06954  
4.75 180 30 229.90787  
4.50 180 30 780.60885  
4.25 180 30 2167.19156  
4.00 180 30 5509.06246  
3.75 180 30 8839.72459  
3.50 180 30 9609.41842  
3.25 180 30 9838.58730  
3.00 180 30 9929.31685  
2.75 180 30 9968.32527  
2.50 180 30 9985.66007  
2.25 180 30 9993.47803  
100.00 180 40 -0.00000  
50.00 180 40 -0.00000  
40.00 180 40 -0.00001  
30.00 180 40 -0.00005  
25.00 180 40 -0.00015  
20.00 180 40 -0.00067  
18.00 180 40 -0.00138  
16.00 180 40 -0.00320  
14.00 180 40 -0.00893  
13.00 180 40 -0.01684  
12.00 180 40 -0.03640  
11.00 180 40 -0.09326  
10.50 180 40 -0.15840  
10.00 180 40 -0.27670  
9.75 180 40 -0.36821  
9.50 180 40 -0.49122  
9.25 180 40 -0.65601  
9.00 180 40 -0.87590  
8.75 180 40 -1.16798  
8.50 180 40 -1.55432  
8.25 180 40 -2.06371  
8.00 180 40 -2.73466  
7.75 180 40 -3.62053  
7.50 180 40 -4.79841  
7.25 180 40 -6.38316  
7.00 180 40 -8.54630  
6.75 180 40 -11.53038  
6.50 180 40 -15.62167  
6.25 180 40 -20.96690  
6.00 180 40 -26.92766  
5.75 180 40 -30.21963  
5.50 180 40 -20.10773  
5.25 180 40 33.10055  
5.00 180 40 204.19376  
4.75 180 40 671.03792  
4.50 180 40 1846.95078  
4.25 180 40 4717.26168  
4.00 180 40 8616.81158  
3.75 180 40 9605.31563  
3.50 180 40 9862.91248  
3.25 180 40 9949.00062  
3.00 180 40 9980.54928  
2.75 180 40 9992.51177  
2.50 180 40 9997.10677  
2.25 180 40 9998.88059  
100.00 180 50 -0.00000  
50.00 180 50 -0.00000  
40.00 180 50 -0.00001  
30.00 180 50 -0.00004  
25.00 180 50 -0.00014  
20.00 180 50 -0.00061  
18.00 180 50 -0.00126  
16.00 180 50 -0.00294  
14.00 180 50 -0.00823  
13.00 180 50 -0.01551  
12.00 180 50 -0.03342  
11.00 180 50 -0.08526  
10.50 180 50 -0.14455  
10.00 180 50 -0.25219  
9.75 180 50 -0.33550  
9.50 180 50 -0.44756  
9.25 180 50 -0.59784  
9.00 180 50 -0.79863  
8.75 180 50 -1.06583  
8.50 180 50 -1.42008  
8.25 180 50 -1.88855  
8.00 180 50 -2.50787  
7.75 180 50 -3.32928  
7.50 180 50 -4.42726  
7.25 180 50 -5.91304  
7.00 180 50 -7.95187  
6.75 180 50 -10.77327  
6.50 180 50 -14.63278  
6.25 180 50 -19.60110  
6.00 180 50 -24.85225  
5.75 180 50 -26.65383  
5.50 180 50 -13.26245  
5.25 180 50 47.08182  
5.00 180 50 232.80764  
4.75 180 50 726.52359

4.50 180 50 1943.62545  
 4.25 180 50 4864.84460  
 4.00 180 50 8663.63061  
 3.75 180 50 9616.95100  
 3.50 180 50 9866.76129  
 3.25 180 50 9950.44901  
 3.00 180 50 9981.12012  
 2.75 180 50 9992.74043  
 2.50 180 50 9997.19882  
 2.25 180 50 9998.91768  
 100.00 180 60 -0.00000  
 50.00 180 60 -0.00000  
 40.00 180 60 -0.00001  
 30.00 180 60 -0.00004  
 25.00 180 60 -0.00012  
 20.00 180 60 -0.00054  
 18.00 180 60 -0.00113  
 16.00 180 60 -0.00266  
 14.00 180 60 -0.00747  
 13.00 180 60 -0.01399  
 12.00 180 60 -0.02980  
 11.00 180 60 -0.07478  
 10.50 180 60 -0.12580  
 10.00 180 60 -0.21815  
 9.75 180 60 -0.28958  
 9.50 180 60 -0.38570  
 9.25 180 60 -0.51470  
 9.00 180 60 -0.68728  
 8.75 180 60 -0.91728  
 8.50 180 60 -1.22264  
 8.25 180 60 -1.62680  
 8.00 180 60 -2.16100  
 7.75 180 60 -2.86802  
 7.50 180 60 -3.80868  
 7.25 180 60 -5.07229  
 7.00 180 60 -6.79154  
 6.75 180 60 -9.15812  
 6.50 180 60 -12.42010  
 6.25 180 60 -16.80157  
 6.00 180 60 -22.18357  
 5.75 180 60 -27.15841  
 5.50 180 60 -26.60069  
 5.25 180 60 -6.01647  
 5.00 180 60 70.58855  
 4.75 180 60 285.10216  
 4.50 180 60 812.50431  
 4.25 180 60 2013.59061  
 4.00 180 60 4630.36572  
 3.75 180 60 8253.73032  
 3.50 180 60 9404.10553  
 3.25 180 60 9753.57307  
 3.00 180 60 9890.13792  
 2.75 180 60 9949.39193  
 2.50 180 60 9976.33881  
 2.25 180 60 9988.86111  
 100.00 180 70 -0.00000  
 50.00 180 70 -0.00000  
 40.00 180 70 -0.00000  
 30.00 180 70 -0.00003  
 25.00 180 70 -0.00010  
 20.00 180 70 -0.00048  
 18.00 180 70 -0.00101  
 16.00 180 70 -0.00239  
 14.00 180 70 -0.00670  
 13.00 180 70 -0.01245  
 12.00 180 70 -0.02601  
 11.00 180 70 -0.06346  
 10.50 180 70 -0.10527  
 10.00 180 70 -0.18045  
 9.75 180 70 -0.23845  
 9.50 180 70 -0.31647  
 9.25 180 70 -0.42124  
 9.00 180 70 -0.56157  
 8.75 180 70 -0.74890  
 8.50 180 70 -0.99806  
 8.25 180 70 -1.32820  
 8.00 180 70 -1.76440  
 7.75 180 70 -2.33992  
 7.50 180 70 -3.10021  
 7.25 180 70 -4.10938  
 7.00 180 70 -5.46060  
 6.75 180 70 -7.29117  
 6.50 180 70 -9.80001  
 6.25 180 70 -13.25548  
 6.00 180 70 -17.95596  
 5.75 180 70 -24.04630  
 5.50 180 70 -30.97227  
 5.25 180 70 -36.12719  
 5.00 180 70 -31.86178  
 4.75 180 70 0.57365  
 4.50 180 70 102.55209  
 4.25 180 70 359.37504  
 4.00 180 70 940.32395  
 3.75 180 70 2176.75966  
 3.50 180 70 4712.25388  
 3.25 180 70 8122.67786  
 3.00 180 70 9307.20408  
 2.75 180 70 9680.00081  
 2.50 180 70 9827.40761  
 2.25 180 70 9902.03981  
 100.00 180 80 -0.00000  
 50.00 180 80 -0.00000  
 40.00 180 80 -0.00000

30.00 180 80 -0.00003  
 25.00 180 80 -0.00009  
 20.00 180 80 -0.00042  
 18.00 180 80 -0.00090  
 16.00 180 80 -0.00215  
 14.00 180 80 -0.00601  
 13.00 180 80 -0.01107  
 12.00 180 80 -0.02259  
 11.00 180 80 -0.05318  
 10.50 180 80 -0.08652  
 10.00 180 80 -0.14580  
 9.75 180 80 -0.19133  
 9.50 180 80 -0.25250  
 9.25 180 80 -0.33467  
 9.00 180 80 -0.44493  
 8.75 180 80 -0.59258  
 8.50 180 80 -0.78979  
 8.25 180 80 -1.05239  
 8.00 180 80 -1.40110  
 7.75 180 80 -1.86320  
 7.50 180 80 -2.47522  
 7.25 180 80 -3.28725  
 7.00 180 80 -4.36993  
 6.75 180 80 -5.82558  
 6.50 180 80 -7.80491  
 6.25 180 80 -10.52925  
 6.00 180 80 -14.31269  
 5.75 180 80 -19.56279  
 5.50 180 80 -26.69972  
 5.25 180 80 -35.84326  
 5.00 180 80 -45.91151  
 4.75 180 80 -52.29744  
 4.50 180 80 -41.12578  
 4.25 180 80 24.88009  
 4.00 180 80 241.62750  
 3.75 180 80 852.14558  
 3.50 180 80 2464.38468  
 3.25 180 80 6441.50718  
 3.00 180 80 9131.85809  
 2.75 180 80 9693.76103  
 2.50 180 80 9866.46882  
 2.25 180 80 9938.91001  
 100.00 180 90 -0.00000  
 50.00 180 90 -0.00000  
 40.00 180 90 -0.00000  
 30.00 180 90 -0.00002  
 25.00 180 90 -0.00008  
 20.00 180 90 -0.00039  
 18.00 180 90 -0.00083  
 16.00 180 90 -0.00198  
 14.00 180 90 -0.00552  
 13.00 180 90 -0.01004  
 12.00 180 90 -0.02000  
 11.00 180 90 -0.04522  
 10.50 180 90 -0.07190  
 10.00 180 90 -0.11855  
 9.75 180 90 -0.15412  
 9.50 180 90 -0.20177  
 9.25 180 90 -0.26574  
 9.00 180 90 -0.35174  
 8.75 180 90 -0.46736  
 8.50 180 90 -0.62273  
 8.25 180 90 -0.83134  
 8.00 180 90 -1.11123  
 7.75 180 90 -1.48660  
 7.50 180 90 -1.99033  
 7.25 180 90 -2.66781  
 7.00 180 90 -3.58277  
 6.75 180 90 -4.82626  
 6.50 180 90 -6.52944  
 6.25 180 90 -8.87948  
 6.00 180 90 -12.13190  
 5.75 180 90 -16.59589  
 5.50 180 90 -22.52366  
 5.25 180 90 -29.71938  
 5.00 180 90 -36.39307  
 4.75 180 90 -36.05137  
 4.50 180 90 -9.32528  
 4.25 180 90 97.37992  
 4.00 180 90 428.12035  
 3.75 180 90 1367.30670  
 3.50 180 90 3941.19179  
 3.25 180 90 8421.76153  
 3.00 180 90 9589.67292  
 2.75 180 90 9865.36573  
 2.50 180 90 9952.36488  
 2.25 180 90 9982.70340  
 100.00 180 100 -0.00000  
 50.00 180 100 -0.00000  
 40.00 180 100 -0.00000  
 30.00 180 100 -0.00002  
 25.00 180 100 -0.00008  
 20.00 180 100 -0.00039  
 18.00 180 100 -0.00082  
 16.00 180 100 -0.00194  
 14.00 180 100 -0.00533  
 13.00 180 100 -0.00956  
 12.00 180 100 -0.01857  
 11.00 180 100 -0.04028  
 10.50 180 100 -0.06243  
 10.00 180 100 -0.10036  
 9.75 180 100 -0.12894  
 9.50 180 100 -0.16703

9.25 180 100 -0.21803  
 9.00 180 100 -0.28656  
 8.75 180 100 -0.37893  
 8.50 180 100 -0.50372  
 8.25 180 100 -0.67266  
 8.00 180 100 -0.90181  
 7.75 180 100 -1.21336  
 7.50 180 100 -1.63819  
 7.25 180 100 -2.21974  
 7.00 180 100 -3.01976  
 6.75 180 100 -4.12655  
 6.50 180 100 -5.66565  
 6.25 180 100 -7.81074  
 6.00 180 100 -10.78426  
 5.75 180 100 -14.81648  
 5.50 180 100 -19.97620  
 5.25 180 100 -25.64897  
 5.00 180 100 -29.10032  
 4.75 180 100 -21.72546  
 4.50 180 100 20.52375  
 4.25 180 100 161.55081  
 4.00 180 100 568.28117  
 3.75 180 100 1678.03654  
 3.50 180 100 4654.47858  
 3.25 180 100 8751.91852  
 3.00 180 100 9666.36056  
 2.75 180 100 9891.29391  
 2.50 180 100 9962.24411  
 2.25 180 100 9986.59969  
 100.00 180 110 -0.00000  
 50.00 180 110 -0.00000  
 40.00 180 110 -0.00000  
 30.00 180 110 -0.00003  
 25.00 180 110 -0.00009  
 20.00 180 110 -0.00043  
 18.00 180 110 -0.00089  
 16.00 180 110 -0.00207  
 14.00 180 110 -0.00557  
 13.00 180 110 -0.00984  
 12.00 180 110 -0.01865  
 11.00 180 110 -0.03888  
 10.50 180 110 -0.05876  
 10.00 180 110 -0.09195  
 9.75 180 110 -0.11658  
 9.50 180 110 -0.14913  
 9.25 180 110 -0.19247  
 9.00 180 110 -0.25052  
 8.75 180 110 -0.32871  
 8.50 180 110 -0.43460  
 8.25 180 110 -0.57868  
 8.00 180 110 -0.77564  
 7.75 180 110 -1.04618  
 7.50 180 110 -1.41959  
 7.25 180 110 -1.93766  
 7.00 180 110 -2.66030  
 6.75 180 110 -3.67345  
 6.50 180 110 -5.09919  
 6.25 180 110 -7.10597  
 6.00 180 110 -9.91014  
 5.75 180 110 -13.74264  
 5.50 180 110 -18.71035  
 5.25 180 110 -24.37431  
 5.00 180 110 -28.61095  
 4.75 180 110 -24.71599  
 4.50 180 110 5.74990  
 4.25 180 110 110.49346  
 4.00 180 110 409.81351  
 3.75 180 110 1205.72573  
 3.50 180 110 3262.89420  
 3.25 180 110 7673.57389  
 3.00 180 110 9424.87889  
 2.75 180 110 9813.22936  
 2.50 180 110 9933.00338  
 2.25 180 110 9975.12335  
 100.00 180 120 -0.00000  
 50.00 180 120 -0.00000  
 40.00 180 120 -0.00001  
 30.00 180 120 -0.00004  
 25.00 180 120 -0.00012  
 20.00 180 120 -0.00052  
 18.00 180 120 -0.00106  
 16.00 180 120 -0.00243  
 14.00 180 120 -0.00641  
 13.00 180 120 -0.01116  
 12.00 180 120 -0.02072  
 11.00 180 120 -0.04188  
 10.50 180 120 -0.06203  
 10.00 180 120 -0.09493  
 9.75 180 120 -0.11902  
 9.50 180 120 -0.15064  
 9.25 180 120 -0.19249  
 9.00 180 120 -0.24837  
 8.75 180 120 -0.32359  
 8.50 180 120 -0.42560  
 8.25 180 120 -0.56495  
 8.00 180 120 -0.75653  
 7.75 180 120 -1.02148  
 7.50 180 120 -1.38992  
 7.25 180 120 -1.90475  
 7.00 180 120 -2.62716  
 6.75 180 120 -3.64422  
 6.50 180 120 -5.07867  
 6.25 180 120 -7.10006

6.00 180 120 -9.93243  
5.75 180 120 -13.84407  
5.50 180 120 -19.08064  
5.25 180 120 -25.64536  
5.00 180 120 -32.69913  
4.75 180 120 -37.05721  
4.50 180 120 -29.59044  
4.25 180 120 13.20341  
4.00 180 120 148.85813  
3.75 180 120 515.11446  
3.50 180 120 1439.07566  
3.25 180 120 3691.64018  
3.00 180 120 7877.83385  
2.75 180 120 9387.28125  
2.50 180 120 9770.42951  
2.25 180 120 9906.04662  
100.00 180 130 -0.00000  
50.00 180 130 -0.00000  
40.00 180 130 -0.00001  
30.00 180 130 -0.00005  
25.00 180 130 -0.00015  
20.00 180 130 -0.00066  
18.00 180 130 -0.00135  
16.00 180 130 -0.00306  
14.00 180 130 -0.00796  
13.00 180 130 -0.01377  
12.00 180 130 -0.02532  
11.00 180 130 -0.05051  
10.50 180 130 -0.07423  
10.00 180 130 -0.11276  
9.75 180 130 -0.14096  
9.50 180 130 -0.17802  
9.25 180 130 -0.22725  
9.00 180 130 -0.29334  
8.75 180 130 -0.38291  
8.50 180 130 -0.50537  
8.25 180 130 -0.67411  
8.00 180 130 -0.90808  
7.75 180 130 -1.23406  
7.50 180 130 -1.68977  
7.25 180 130 -2.32795  
7.00 180 130 -3.22185  
6.75 180 130 -4.47225  
6.50 180 130 -6.21588  
6.25 180 130 -8.63443  
6.00 180 130 -11.96059  
5.75 180 130 -16.47159  
5.50 180 130 -22.44657  
5.25 180 130 -30.03263  
5.00 180 130 -38.89875  
4.75 180 130 -47.42321  
4.50 180 130 -50.89307  
4.25 180 130 -37.64955  
4.00 180 130 19.05163  
3.75 180 130 178.33760  
3.50 180 130 569.15365  
3.25 180 130 1472.15447  
3.00 180 130 3494.80737  
2.75 180 130 7361.73398  
2.50 180 130 9193.82871  
2.25 180 130 9679.08698  
100.00 180 140 -0.00000  
50.00 180 140 -0.00000  
40.00 180 140 -0.00001  
30.00 180 140 -0.00006  
25.00 180 140 -0.00019  
20.00 180 140 -0.00084  
18.00 180 140 -0.00173  
16.00 180 140 -0.00392  
14.00 180 140 -0.01025  
13.00 180 140 -0.01776  
12.00 180 140 -0.03279  
11.00 180 140 -0.06591  
10.50 180 140 -0.09761  
10.00 180 140 -0.15011  
9.75 180 140 -0.18921  
9.50 180 140 -0.24137  
9.25 180 140 -0.31177  
9.00 180 140 -0.40781  
8.75 180 140 -0.54011  
8.50 180 140 -0.72376  
8.25 180 140 -0.98016  
8.00 180 140 -1.33934  
7.75 180 140 -1.84306  
7.50 180 140 -2.54847  
7.25 180 140 -3.53260  
7.00 180 140 -4.89682  
6.75 180 140 -6.77048  
6.50 180 140 -9.31057  
6.25 180 140 -12.69039  
6.00 180 140 -17.06102  
5.75 180 140 -22.44965  
5.50 180 140 -28.51970  
5.25 180 140 -34.04662  
5.00 180 140 -35.85009  
4.75 180 140 -26.77298  
4.50 180 140 7.84317  
4.25 180 140 95.78963  
4.00 180 140 286.32952  
3.75 180 140 662.45214  
3.50 180 140 1361.73017  
3.25 180 140 2621.45625  
3.00 180 140 4888.88425

2.75 180 140 7894.63751  
 2.50 180 140 9192.46536  
 2.25 180 140 9655.38976  
 100.00 180 150 -0.00000  
 50.00 180 150 -0.00000  
 40.00 180 150 -0.00001  
 30.00 180 150 -0.00007  
 25.00 180 150 -0.00024  
 20.00 180 150 -0.00105  
 18.00 180 150 -0.00216  
 16.00 180 150 -0.00494  
 14.00 180 150 -0.01306  
 13.00 180 150 -0.02283  
 12.00 180 150 -0.04271  
 11.00 180 150 -0.08790  
 10.50 180 150 -0.13270  
 10.00 180 150 -0.20952  
 9.75 180 150 -0.26839  
 9.50 180 150 -0.34852  
 9.25 180 150 -0.45886  
 9.00 180 150 -0.61229  
 8.75 180 150 -0.82720  
 8.50 180 150 -1.12971  
 8.25 180 150 -1.55635  
 8.00 180 150 -2.15752  
 7.75 180 150 -3.00120  
 7.50 180 150 -4.17655  
 7.25 180 150 -5.79561  
 7.00 180 150 -7.98932  
 6.75 180 150 -10.88835  
 6.50 180 150 -14.56640  
 6.25 180 150 -18.89361  
 6.00 180 150 -23.18134  
 5.75 180 150 -25.36351  
 5.50 180 150 -20.20416  
 5.25 180 150 4.38916  
 5.00 180 150 74.35345  
 4.75 180 150 241.28245  
 4.50 180 150 599.12774  
 4.25 180 150 1300.94407  
 4.00 180 150 2562.54907  
 3.75 180 150 4638.50239  
 3.50 180 150 7290.26188  
 3.25 180 150 8697.90285  
 3.00 180 150 9289.74715  
 2.75 180 150 9592.59742  
 2.50 180 150 9765.32918  
 2.25 180 150 9861.20222  
 100.00 180 160 -0.00000  
 50.00 180 160 -0.00000  
 40.00 180 160 -0.00001  
 30.00 180 160 -0.00008  
 25.00 180 160 -0.00028  
 20.00 180 160 -0.00124  
 18.00 180 160 -0.00257  
 16.00 180 160 -0.00594  
 14.00 180 160 -0.01590  
 13.00 180 160 -0.02810  
 12.00 180 160 -0.05342  
 11.00 180 160 -0.11317  
 10.50 180 160 -0.17477  
 10.00 180 160 -0.28416  
 9.75 180 160 -0.37020  
 9.50 180 160 -0.48942  
 9.25 180 160 -0.65626  
 9.00 180 160 -0.89153  
 8.75 180 160 -1.22485  
 8.50 180 160 -1.69778  
 8.25 180 160 -2.36763  
 8.00 180 160 -3.31135  
 7.75 180 160 -4.62848  
 7.50 180 160 -6.44010  
 7.25 180 160 -8.87613  
 7.00 180 160 -12.03207  
 6.75 180 160 -15.84742  
 6.50 180 160 -19.78721  
 6.25 180 160 -22.04030  
 6.00 180 160 -17.56788  
 5.75 180 160 6.46592  
 5.50 180 160 80.86914  
 5.25 180 160 275.55842  
 5.00 180 160 739.07640  
 4.75 180 160 1759.97375  
 4.50 180 160 3827.33023  
 4.25 180 160 7176.81036  
 4.00 180 160 8867.61110  
 3.75 180 160 9398.09244  
 3.50 180 160 9642.50224  
 3.25 180 160 9780.19519  
 3.00 180 160 9861.97153  
 2.75 180 160 9912.17987  
 2.50 180 160 9943.66098  
 2.25 180 160 9963.66608  
 100.00 180 170 -0.00000  
 50.00 180 170 -0.00000  
 40.00 180 170 -0.00001  
 30.00 180 170 -0.00009  
 25.00 180 170 -0.00031  
 20.00 180 170 -0.00138  
 18.00 180 170 -0.00287  
 16.00 180 170 -0.00667  
 14.00 180 170 -0.01806  
 13.00 180 170 -0.03218

```

12.00 180 170 -0.06198
11.00 180 170 -0.13437
10.50 180 170 -0.21120
10.00 180 170 -0.35104
9.75 180 170 -0.46292
9.50 180 170 -0.61965
9.25 180 170 -0.84110
9.00 180 170 -1.15579
8.75 180 170 -1.60412
8.50 180 170 -2.24227
8.25 180 170 -3.14639
8.00 180 170 -4.41602
7.75 180 170 -6.17346
7.50 180 170 -8.55112
7.25 180 170 -11.64586
7.00 180 170 -15.38552
6.75 180 170 -19.16485
6.50 180 170 -20.88471
6.25 180 170 -14.47950
6.00 180 170 16.27148
5.75 180 170 112.68426
5.50 180 170 375.44586
5.25 180 170 1037.18818
5.00 180 170 2594.77478
4.75 180 170 5943.68190
4.50 180 170 8712.22624
4.25 180 170 9435.21098
4.00 180 170 9713.51693
3.75 180 170 9847.26103
3.50 180 170 9916.40885
3.25 180 170 9953.60160
3.00 180 170 9974.04510
2.75 180 170 9985.41814
2.50 180 170 9991.78783
2.25 180 170 9995.36880
100.00 180 180 -0.00000
50.00 180 180 -0.00000
40.00 180 180 -0.00002
30.00 180 180 -0.00010
25.00 180 180 -0.00032
20.00 180 180 -0.00143
18.00 180 180 -0.00298
16.00 180 180 -0.00694
14.00 180 180 -0.01887
13.00 180 180 -0.03373
12.00 180 180 -0.06528
11.00 180 180 -0.14278
10.50 180 180 -0.22589
10.00 180 180 -0.37850
9.75 180 180 -0.50131
9.50 180 180 -0.67397
9.25 180 180 -0.91867
9.00 180 180 -1.26723
8.75 180 180 -1.76460
8.50 180 180 -2.47301
8.25 180 180 -3.47627
8.00 180 180 -4.88244
7.75 180 180 -6.82073
7.50 180 180 -9.42105
7.25 180 180 -12.74621
7.00 180 180 -16.59703
6.75 180 180 -19.97982
6.50 180 180 -19.68929
6.25 180 180 -6.61997
6.00 180 180 43.58607
5.75 180 180 193.43309
5.50 180 180 596.76760
5.25 180 180 1611.87193
5.00 180 180 4000.39471
4.75 180 180 7900.61029
4.50 180 180 9253.37450
4.25 180 180 9651.45982
4.00 180 180 9825.25986
3.75 180 180 9909.24976
3.50 180 180 9952.01248
3.25 180 180 9974.38445
3.00 180 180 9986.25794
2.75 180 180 9992.60801
2.50 180 180 9996.01806
2.25 180 180 9997.85334

#end of grid

```

---

<sup>i</sup> A. G. Császár and G. Fogarasi, *Spectroc. Acta A*, 1989, **45A**, 845.

2 J. Cui, Z. Li and R. V. Krems, *J. Chem. Phys.*, 2015, **143**, 154101.

3 B. A. McGuire, A. M. Burkhardt, S. Kalenskii, C. N. Shingledecker, A. J. Remijan, E.

Herbst and M. C. McCarthy, *Science*, 2018, **359**, 202.
